# Supplementary material
Source: MDPI journal article supplement (https://www.mdpi.com/2504-446X/8/3/115)
Supplement: s1 [file s1]

Archive with 18 entries (18 files):
- Supplementary Material Fig S1-17.pdf
- Table S1 Alligator mississippiensis Framework.csv
- Table S10 Crocodylus rhombifer Framework.csv
- Table S11 Crocodylus suchus Framework.csv
- Table S12 Gavialis gangeticus Framework.csv
- Table S13 Mecistops leptorhynchus Framework.csv
- Table S14 Melanosuchus niger Framework.csv
- Table S15 Osteolaemus tetraspis Framework.csv
- Table S16 Paleosuchus palpebrosus Framework.csv
- Table S17 Paleosuchus trigonatus Framework.csv
- Table S2 Caiman crocodilus Framework.csv
- Table S3 Crocodylus acutus Framework.csv
- Table S4 Crocodylus intermedius Framework.csv
- Table S5 Crocodylus johnstoni Framework.csv
- Table S6 Crocodylus moreletii Framework.csv
- Table S7 Crocodylus niloticus Framework.csv
- Table S8 Crocodylus palustris Framework.csv
- Table S9 Crocodylus porosus Framework.csv
