# Supplementary material
Source: MDPI journal article supplement (https://www.mdpi.com/2504-446X/8/3/115)
Supplement: s1 [file s1 › Table S1 Alligator mississippiensis Framework.csv]

Head Length (cm)	Fit (estimation) (cm)	Lower limit (95% confidence interval) (cm)	Upper limit (95% confidence interval) (cm)
2.70	18.48	16.57	20.61
2.80	19.19	17.20	21.40
2.90	19.90	17.84	22.19
3.00	20.61	18.48	22.99
3.10	21.32	19.12	23.78
3.20	22.04	19.76	24.58
3.30	22.75	20.40	25.37
3.40	23.47	21.04	26.17
3.50	24.18	21.68	26.97
3.60	24.90	22.33	27.77
3.70	25.62	22.97	28.57
3.80	26.33	23.61	29.37
3.90	27.05	24.26	30.17
4.00	27.77	24.90	30.97
4.10	28.49	25.55	31.77
4.20	29.21	26.19	32.58
4.30	29.93	26.84	33.38
4.40	30.66	27.49	34.19
4.50	31.38	28.14	34.99
4.60	32.10	28.78	35.80
4.70	32.82	29.43	36.61
4.80	33.55	30.08	37.41
4.90	34.27	30.73	38.22
5.00	35.00	31.38	39.03
5.10	35.73	32.04	39.84
5.20	36.45	32.69	40.65
5.30	37.18	33.34	41.46
5.40	37.91	33.99	42.27
5.50	38.63	34.64	43.08
5.60	39.36	35.30	43.90
5.70	40.09	35.95	44.71
5.80	40.82	36.60	45.52
5.90	41.55	37.26	46.34
6.00	42.28	37.91	47.15
6.10	43.01	38.57	47.96
6.20	43.74	39.23	48.78
6.30	44.47	39.88	49.60
6.40	45.21	40.54	50.41
6.50	45.94	41.19	51.23
6.60	46.67	41.85	52.05
6.70	47.40	42.51	52.86
6.80	48.14	43.17	53.68
6.90	48.87	43.83	54.50
7.00	49.61	44.48	55.32
7.10	50.34	45.14	56.14
7.20	51.08	45.80	56.96
7.30	51.81	46.46	57.78
7.40	52.55	47.12	58.60
7.50	53.28	47.78	59.42
7.60	54.02	48.44	60.24
7.70	54.76	49.10	61.06
7.80	55.50	49.77	61.89
7.90	56.23	50.43	62.71
8.00	56.97	51.09	63.53
8.10	57.71	51.75	64.35
8.20	58.45	52.41	65.18
8.30	59.19	53.08	66.00
8.40	59.93	53.74	66.83
8.50	60.67	54.40	67.65
8.60	61.41	55.07	68.48
8.70	62.15	55.73	69.30
8.80	62.89	56.39	70.13
8.90	63.63	57.06	70.95
9.00	64.37	57.72	71.78
9.10	65.11	58.39	72.61
9.20	65.85	59.05	73.43
9.30	66.60	59.72	74.26
9.40	67.34	60.39	75.09
9.50	68.08	61.05	75.92
9.60	68.82	61.72	76.75
9.70	69.57	62.38	77.58
9.80	70.31	63.05	78.41
9.90	71.05	63.72	79.23
10.00	71.80	64.39	80.06
10.10	72.54	65.05	80.89
10.20	73.29	65.72	81.72
10.30	74.03	66.39	82.56
10.40	74.78	67.06	83.39
10.50	75.52	67.73	84.22
10.60	76.27	68.40	85.05
10.70	77.02	69.06	85.88
10.80	77.76	69.73	86.71
10.90	78.51	70.40	87.55
11.00	79.25	71.07	88.38
11.10	80.00	71.74	89.21
11.20	80.75	72.41	90.04
11.30	81.50	73.08	90.88
11.40	82.24	73.75	91.71
11.50	82.99	74.42	92.55
11.60	83.74	75.10	93.38
11.70	84.49	75.77	94.22
11.80	85.24	76.44	95.05
11.90	85.99	77.11	95.89
12.00	86.74	77.78	96.72
12.10	87.49	78.45	97.56
12.20	88.23	79.13	98.39
12.30	88.98	79.80	99.23
12.40	89.73	80.47	100.06
12.50	90.48	81.14	100.90
12.60	91.24	81.82	101.74
12.70	91.99	82.49	102.58
12.80	92.74	83.16	103.41
12.90	93.49	83.84	104.25
13.00	94.24	84.51	105.09
13.10	94.99	85.19	105.93
13.20	95.74	85.86	106.76
13.30	96.50	86.53	107.60
13.40	97.25	87.21	108.44
13.50	98.00	87.88	109.28
13.60	98.75	88.56	110.12
13.70	99.51	89.23	110.96
13.80	100.26	89.91	111.80
13.90	101.01	90.58	112.64
14.00	101.76	91.26	113.48
14.10	102.52	91.94	114.32
14.20	103.27	92.61	115.16
14.30	104.03	93.29	116.00
14.40	104.78	93.96	116.84
14.50	105.53	94.64	117.68
14.60	106.29	95.32	118.52
14.70	107.04	95.99	119.37
14.80	107.80	96.67	120.21
14.90	108.55	97.35	121.05
15.00	109.31	98.03	121.89
15.10	110.07	98.70	122.74
15.20	110.82	99.38	123.58
15.30	111.58	100.06	124.42
15.40	112.33	100.74	125.26
15.50	113.09	101.41	126.11
15.60	113.85	102.09	126.95
15.70	114.60	102.77	127.79
15.80	115.36	103.45	128.64
15.90	116.12	104.13	129.48
16.00	116.87	104.81	130.33
16.10	117.63	105.49	131.17
16.20	118.39	106.17	132.02
16.30	119.15	106.85	132.86
16.40	119.90	107.53	133.71
16.50	120.66	108.21	134.55
16.60	121.42	108.89	135.40
16.70	122.18	109.57	136.24
16.80	122.94	110.25	137.09
16.90	123.69	110.93	137.93
17.00	124.45	111.61	138.78
17.10	125.21	112.29	139.63
17.20	125.97	112.97	140.47
17.30	126.73	113.65	141.32
17.40	127.49	114.33	142.17
17.50	128.25	115.01	143.01
17.60	129.01	115.69	143.86
17.70	129.77	116.37	144.71
17.80	130.53	117.06	145.56
17.90	131.29	117.74	146.40
18.00	132.05	118.42	147.25
18.10	132.81	119.10	148.10
18.20	133.57	119.78	148.95
18.30	134.33	120.47	149.80
18.40	135.09	121.15	150.65
18.50	135.86	121.83	151.49
18.60	136.62	122.51	152.34
18.70	137.38	123.20	153.19
18.80	138.14	123.88	154.04
18.90	138.90	124.56	154.89
19.00	139.66	125.25	155.74
19.10	140.43	125.93	156.59
19.20	141.19	126.61	157.44
19.30	141.95	127.30	158.29
19.40	142.71	127.98	159.14
19.50	143.48	128.66	159.99
19.60	144.24	129.35	160.84
19.70	145.00	130.03	161.69
19.80	145.76	130.72	162.54
19.90	146.53	131.40	163.39
20.00	147.29	132.09	164.25
20.10	148.05	132.77	165.10
20.20	148.82	133.45	165.95
20.30	149.58	134.14	166.80
20.40	150.35	134.82	167.65
20.50	151.11	135.51	168.50
20.60	151.87	136.20	169.36
20.70	152.64	136.88	170.21
20.80	153.40	137.57	171.06
20.90	154.17	138.25	171.91
21.00	154.93	138.94	172.77
21.10	155.70	139.62	173.62
21.20	156.46	140.31	174.47
21.30	157.23	141.00	175.33
21.40	157.99	141.68	176.18
21.50	158.76	142.37	177.03
21.60	159.52	143.05	177.89
21.70	160.29	143.74	178.74
21.80	161.05	144.43	179.59
21.90	161.82	145.11	180.45
22.00	162.59	145.80	181.30
22.10	163.35	146.49	182.16
22.20	164.12	147.18	183.01
22.30	164.89	147.86	183.87
22.40	165.65	148.55	184.72
22.50	166.42	149.24	185.58
22.60	167.19	149.93	186.43
22.70	167.95	150.61	187.29
22.80	168.72	151.30	188.14
22.90	169.49	151.99	189.00
23.00	170.25	152.68	189.85
23.10	171.02	153.37	190.71
23.20	171.79	154.05	191.56
23.30	172.56	154.74	192.42
23.40	173.32	155.43	193.28
23.50	174.09	156.12	194.13
23.60	174.86	156.81	194.99
23.70	175.63	157.50	195.85
23.80	176.40	158.19	196.70
23.90	177.16	158.87	197.56
24.00	177.93	159.56	198.42
24.10	178.70	160.25	199.27
24.20	179.47	160.94	200.13
24.30	180.24	161.63	200.99
24.40	181.01	162.32	201.85
24.50	181.78	163.01	202.70
24.60	182.55	163.70	203.56
24.70	183.32	164.39	204.42
24.80	184.09	165.08	205.28
24.90	184.85	165.77	206.14
25.00	185.62	166.46	206.99
25.10	186.39	167.15	207.85
25.20	187.16	167.84	208.71
25.30	187.93	168.53	209.57
25.40	188.70	169.22	210.43
25.50	189.47	169.91	211.29
25.60	190.24	170.60	212.15
25.70	191.02	171.29	213.01
25.80	191.79	171.99	213.87
25.90	192.56	172.68	214.72
26.00	193.33	173.37	215.58
26.10	194.10	174.06	216.44
26.20	194.87	174.75	217.30
26.30	195.64	175.44	218.16
26.40	196.41	176.13	219.02
26.50	197.18	176.82	219.88
26.60	197.95	177.52	220.74
26.70	198.73	178.21	221.60
26.80	199.50	178.90	222.46
26.90	200.27	179.59	223.33
27.00	201.04	180.28	224.19
27.10	201.81	180.98	225.05
27.20	202.58	181.67	225.91
27.30	203.36	182.36	226.77
27.40	204.13	183.05	227.63
27.50	204.90	183.75	228.49
27.60	205.67	184.44	229.35
27.70	206.45	185.13	230.21
27.80	207.22	185.82	231.08
27.90	207.99	186.52	231.94
28.00	208.76	187.21	232.80
28.10	209.54	187.90	233.66
28.20	210.31	188.60	234.52
28.30	211.08	189.29	235.39
28.40	211.86	189.98	236.25
28.50	212.63	190.68	237.11
28.60	213.40	191.37	237.97
28.70	214.18	192.06	238.84
28.80	214.95	192.76	239.70
28.90	215.72	193.45	240.56
29.00	216.50	194.15	241.42
29.10	217.27	194.84	242.29
29.20	218.05	195.53	243.15
29.30	218.82	196.23	244.01
29.40	219.59	196.92	244.88
29.50	220.37	197.62	245.74
29.60	221.14	198.31	246.60
29.70	221.92	199.01	247.47
29.80	222.69	199.70	248.33
29.90	223.47	200.39	249.20
30.00	224.24	201.09	250.06
30.10	225.02	201.78	250.92
30.20	225.79	202.48	251.79
30.30	226.57	203.17	252.65
30.40	227.34	203.87	253.52
30.50	228.12	204.56	254.38
30.60	228.89	205.26	255.25
30.70	229.67	205.96	256.11
30.80	230.44	206.65	256.98
30.90	231.22	207.35	257.84
31.00	232.00	208.04	258.71
31.10	232.77	208.74	259.57
31.20	233.55	209.43	260.44
31.30	234.32	210.13	261.30
31.40	235.10	210.83	262.17
31.50	235.88	211.52	263.03
31.60	236.65	212.22	263.90
31.70	237.43	212.91	264.77
31.80	238.20	213.61	265.63
31.90	238.98	214.31	266.50
32.00	239.76	215.00	267.36
32.10	240.53	215.70	268.23
32.20	241.31	216.40	269.10
32.30	242.09	217.09	269.96
32.40	242.87	217.79	270.83
32.50	243.64	218.49	271.70
32.60	244.42	219.18	272.56
32.70	245.20	219.88	273.43
32.80	245.97	220.58	274.30
32.90	246.75	221.27	275.16
33.00	247.53	221.97	276.03
33.10	248.31	222.67	276.90
33.20	249.08	223.37	277.76
33.30	249.86	224.06	278.63
33.40	250.64	224.76	279.50
33.50	251.42	225.46	280.37
33.60	252.20	226.16	281.24
33.70	252.97	226.85	282.10
33.80	253.75	227.55	282.97
33.90	254.53	228.25	283.84
34.00	255.31	228.95	284.71
34.10	256.09	229.64	285.58
34.20	256.87	230.34	286.44
34.30	257.64	231.04	287.31
34.40	258.42	231.74	288.18
34.50	259.20	232.44	289.05
34.60	259.98	233.14	289.92
34.70	260.76	233.83	290.79
34.80	261.54	234.53	291.65
34.90	262.32	235.23	292.52
35.00	263.10	235.93	293.39
35.10	263.88	236.63	294.26
35.20	264.66	237.33	295.13
35.30	265.44	238.03	296.00
35.40	266.22	238.73	296.87
35.50	266.99	239.43	297.74
35.60	267.77	240.12	298.61
35.70	268.55	240.82	299.48
35.80	269.33	241.52	300.35
35.90	270.11	242.22	301.22
36.00	270.89	242.92	302.09
36.10	271.67	243.62	302.96
36.20	272.45	244.32	303.83
36.30	273.23	245.02	304.70
36.40	274.01	245.72	305.57
36.50	274.80	246.42	306.44
36.60	275.58	247.12	307.31
36.70	276.36	247.82	308.18
36.80	277.14	248.52	309.05
36.90	277.92	249.22	309.92
37.00	278.70	249.92	310.79
37.10	279.48	250.62	311.66
37.20	280.26	251.32	312.53
37.30	281.04	252.02	313.40
37.40	281.82	252.72	314.28
37.50	282.60	253.42	315.15
37.60	283.38	254.12	316.02
37.70	284.17	254.82	316.89
37.80	284.95	255.52	317.76
37.90	285.73	256.22	318.63
38.00	286.51	256.92	319.50
38.10	287.29	257.63	320.38
38.20	288.07	258.33	321.25
38.30	288.86	259.03	322.12
38.40	289.64	259.73	322.99
38.50	290.42	260.43	323.86
38.60	291.20	261.13	324.74
38.70	291.98	261.83	325.61
38.80	292.77	262.53	326.48
38.90	293.55	263.23	327.35
39.00	294.33	263.94	328.23
39.10	295.11	264.64	329.10
39.20	295.90	265.34	329.97
39.30	296.68	266.04	330.84
39.40	297.46	266.74	331.72
39.50	298.24	267.44	332.59
39.60	299.03	268.15	333.46
39.70	299.81	268.85	334.33
39.80	300.59	269.55	335.21
39.90	301.37	270.25	336.08
40.00	302.16	270.95	336.95
40.10	302.94	271.66	337.83
40.20	303.72	272.36	338.70
40.30	304.51	273.06	339.57
40.40	305.29	273.76	340.45
40.50	306.07	274.47	341.32
40.60	306.86	275.17	342.20
40.70	307.64	275.87	343.07
40.80	308.42	276.57	343.94
40.90	309.21	277.28	344.82
41.00	309.99	277.98	345.69
41.10	310.78	278.68	346.57
41.20	311.56	279.38	347.44
41.30	312.34	280.09	348.31
41.40	313.13	280.79	349.19
41.50	313.91	281.49	350.06
41.60	314.70	282.20	350.94
41.70	315.48	282.90	351.81
41.80	316.26	283.60	352.69
41.90	317.05	284.31	353.56
42.00	317.83	285.01	354.44
42.10	318.62	285.71	355.31
42.20	319.40	286.42	356.19
42.30	320.19	287.12	357.06
42.40	320.97	287.82	357.94
42.50	321.76	288.53	358.81
42.60	322.54	289.23	359.69
42.70	323.33	289.93	360.56
42.80	324.11	290.64	361.44
42.90	324.90	291.34	362.31
43.00	325.68	292.05	363.19
43.10	326.47	292.75	364.07
43.20	327.25	293.45	364.94
43.30	328.04	294.16	365.82
43.40	328.82	294.86	366.69
43.50	329.61	295.57	367.57
43.60	330.39	296.27	368.44
43.70	331.18	296.98	369.32
43.80	331.96	297.68	370.20
43.90	332.75	298.38	371.07
44.00	333.54	299.09	371.95
44.10	334.32	299.79	372.83
44.20	335.11	300.50	373.70
44.30	335.89	301.20	374.58
44.40	336.68	301.91	375.46
44.50	337.47	302.61	376.33
44.60	338.25	303.32	377.21
44.70	339.04	304.02	378.09
44.80	339.82	304.73	378.96
44.90	340.61	305.43	379.84
45.00	341.40	306.14	380.72
45.10	342.18	306.84	381.59
45.20	342.97	307.55	382.47
45.30	343.76	308.25	383.35
45.40	344.54	308.96	384.23
45.50	345.33	309.66	385.10
45.60	346.12	310.37	385.98
45.70	346.90	311.08	386.86
45.80	347.69	311.78	387.74
45.90	348.48	312.49	388.61
46.00	349.26	313.19	389.49
46.10	350.05	313.90	390.37
46.20	350.84	314.60	391.25
46.30	351.63	315.31	392.13
46.40	352.41	316.02	393.00
46.50	353.20	316.72	393.88
46.60	353.99	317.43	394.76
46.70	354.78	318.13	395.64
46.80	355.56	318.84	396.52
46.90	356.35	319.55	397.40
47.00	357.14	320.25	398.27
47.10	357.93	320.96	399.15
47.20	358.71	321.67	400.03
47.30	359.50	322.37	400.91
47.40	360.29	323.08	401.79
47.50	361.08	323.78	402.67
47.60	361.87	324.49	403.55
47.70	362.65	325.20	404.43
47.80	363.44	325.90	405.30
47.90	364.23	326.61	406.18
48.00	365.02	327.32	407.06
48.10	365.81	328.02	407.94
48.20	366.60	328.73	408.82
48.30	367.38	329.44	409.70
48.40	368.17	330.15	410.58
48.50	368.96	330.85	411.46
48.60	369.75	331.56	412.34
48.70	370.54	332.27	413.22
48.80	371.33	332.97	414.10
48.90	372.12	333.68	414.98
49.00	372.91	334.39	415.86
49.10	373.69	335.10	416.74
49.20	374.48	335.80	417.62
49.30	375.27	336.51	418.50
49.40	376.06	337.22	419.38
49.50	376.85	337.93	420.26
49.60	377.64	338.63	421.14
49.70	378.43	339.34	422.02
49.80	379.22	340.05	422.90
49.90	380.01	340.76	423.78
50.00	380.80	341.46	424.66
50.10	381.59	342.17	425.54
50.20	382.38	342.88	426.42
50.30	383.17	343.59	427.30
50.40	383.96	344.30	428.18
50.50	384.75	345.00	429.06
50.60	385.54	345.71	429.94
50.70	386.33	346.42	430.83
50.80	387.12	347.13	431.71
50.90	387.91	347.84	432.59
51.00	388.70	348.55	433.47
51.10	389.49	349.25	434.35
51.20	390.28	349.96	435.23
51.30	391.07	350.67	436.11
51.40	391.86	351.38	436.99
51.50	392.65	352.09	437.88
51.60	393.44	352.80	438.76
51.70	394.23	353.51	439.64
51.80	395.02	354.21	440.52
51.90	395.81	354.92	441.40
52.00	396.60	355.63	442.28
52.10	397.39	356.34	443.17
52.20	398.18	357.05	444.05
52.30	398.97	357.76	444.93
52.40	399.76	358.47	445.81
52.50	400.55	359.18	446.69
52.60	401.34	359.89	447.58
52.70	402.13	360.60	448.46
52.80	402.93	361.31	449.34
52.90	403.72	362.01	450.22
53.00	404.51	362.72	451.11
53.10	405.30	363.43	451.99
53.20	406.09	364.14	452.87
53.30	406.88	364.85	453.75
53.40	407.67	365.56	454.64
53.50	408.46	366.27	455.52
53.60	409.26	366.98	456.40
53.70	410.05	367.69	457.28
53.80	410.84	368.40	458.17
53.90	411.63	369.11	459.05
54.00	412.42	369.82	459.93
54.10	413.21	370.53	460.82
54.20	414.01	371.24	461.70
54.30	414.80	371.95	462.58
54.40	415.59	372.66	463.47
54.50	416.38	373.37	464.35
54.60	417.17	374.08	465.23
54.70	417.97	374.79	466.12
54.80	418.76	375.50	467.00
54.90	419.55	376.21	467.88
55.00	420.34	376.92	468.77
55.10	421.13	377.63	469.65
55.20	421.93	378.34	470.53
55.30	422.72	379.05	471.42
55.40	423.51	379.76	472.30
55.50	424.30	380.47	473.18
55.60	425.10	381.18	474.07
55.70	425.89	381.89	474.95
55.80	426.68	382.60	475.84
55.90	427.47	383.32	476.72
56.00	428.27	384.03	477.61
56.10	429.06	384.74	478.49
56.20	429.85	385.45	479.37
56.30	430.65	386.16	480.26
56.40	431.44	386.87	481.14
56.50	432.23	387.58	482.03
56.60	433.03	388.29	482.91
56.70	433.82	389.00	483.80
56.80	434.61	389.71	484.68
56.90	435.40	390.43	485.57
57.00	436.20	391.14	486.45
57.10	436.99	391.85	487.34
57.20	437.78	392.56	488.22
57.30	438.58	393.27	489.10
57.40	439.37	393.98	489.99
57.50	440.16	394.69	490.87
57.60	440.96	395.41	491.76
57.70	441.75	396.12	492.65
57.80	442.55	396.83	493.53
57.90	443.34	397.54	494.42
58.00	444.13	398.25	495.30
58.10	444.93	398.96	496.19
58.20	445.72	399.67	497.07
58.30	446.51	400.39	497.96
58.40	447.31	401.10	498.84
58.50	448.10	401.81	499.73
58.60	448.90	402.52	500.61
58.70	449.69	403.23	501.50
58.80	450.49	403.95	502.39
58.90	451.28	404.66	503.27
59.00	452.07	405.37	504.16
59.10	452.87	406.08	505.04
59.20	453.66	406.80	505.93
59.30	454.46	407.51	506.82
59.40	455.25	408.22	507.70
59.50	456.05	408.93	508.59
59.60	456.84	409.64	509.47
59.70	457.64	410.36	510.36
59.80	458.43	411.07	511.25
59.90	459.22	411.78	512.13
60.00	460.02	412.49	513.02
60.10	460.81	413.21	513.91
60.20	461.61	413.92	514.79
60.30	462.40	414.63	515.68
60.40	463.20	415.35	516.57
60.50	463.99	416.06	517.45
60.60	464.79	416.77	518.34
60.70	465.58	417.48	519.23
60.80	466.38	418.20	520.11
60.90	467.17	418.91	521.00
61.00	467.97	419.62	521.89
61.10	468.76	420.34	522.77
61.20	469.56	421.05	523.66
61.30	470.36	421.76	524.55
61.40	471.15	422.47	525.44
61.50	471.95	423.19	526.32
61.60	472.74	423.90	527.21
61.70	473.54	424.61	528.10
61.80	474.33	425.33	528.98
61.90	475.13	426.04	529.87
62.00	475.92	426.75	530.76
62.10	476.72	427.47	531.65
62.20	477.52	428.18	532.53
62.30	478.31	428.90	533.42
62.40	479.11	429.61	534.31
62.50	479.90	430.32	535.20
62.60	480.70	431.04	536.09
62.70	481.50	431.75	536.97
62.80	482.29	432.46	537.86
62.90	483.09	433.18	538.75
63.00	483.88	433.89	539.64
63.10	484.68	434.60	540.53
63.20	485.48	435.32	541.41
63.30	486.27	436.03	542.30
63.40	487.07	436.75	543.19
63.50	487.87	437.46	544.08
63.60	488.66	438.17	544.97
63.70	489.46	438.89	545.86
63.80	490.26	439.60	546.74
63.90	491.05	440.32	547.63
64.00	491.85	441.03	548.52
64.10	492.65	441.75	549.41
64.20	493.44	442.46	550.30
64.30	494.24	443.17	551.19
64.40	495.04	443.89	552.08
64.50	495.83	444.60	552.96
64.60	496.63	445.32	553.85
64.70	497.43	446.03	554.74
64.80	498.22	446.75	555.63
64.90	499.02	447.46	556.52
65.00	499.82	448.18	557.41
65.10	500.61	448.89	558.30
65.20	501.41	449.61	559.19
65.30	502.21	450.32	560.08
65.40	503.01	451.04	560.97
65.50	503.80	451.75	561.86
65.60	504.60	452.47	562.75
65.70	505.40	453.18	563.63
65.80	506.20	453.89	564.52
65.90	506.99	454.61	565.41
66.00	507.79	455.32	566.30
66.10	508.59	456.04	567.19
66.20	509.39	456.76	568.08
66.30	510.18	457.47	568.97
66.40	510.98	458.19	569.86
66.50	511.78	458.90	570.75
66.60	512.58	459.62	571.64
66.70	513.38	460.33	572.53
66.80	514.17	461.05	573.42
66.90	514.97	461.76	574.31
67.00	515.77	462.48	575.20
67.10	516.57	463.19	576.09
67.20	517.37	463.91	576.98
67.30	518.16	464.62	577.87
67.40	518.96	465.34	578.76
67.50	519.76	466.06	579.65
67.60	520.56	466.77	580.54
67.70	521.36	467.49	581.43
67.80	522.15	468.20	582.32
67.90	522.95	468.92	583.21
68.00	523.75	469.63	584.10
68.10	524.55	470.35	585.00
68.20	525.35	471.07	585.89
68.30	526.15	471.78	586.78
68.40	526.95	472.50	587.67
68.50	527.74	473.21	588.56
68.60	528.54	473.93	589.45
68.70	529.34	474.65	590.34
68.80	530.14	475.36	591.23
68.90	530.94	476.08	592.12
69.00	531.74	476.79	593.01
69.10	532.54	477.51	593.90
69.20	533.34	478.23	594.80
69.30	534.13	478.94	595.69
69.40	534.93	479.66	596.58
69.50	535.73	480.38	597.47
69.60	536.53	481.09	598.36
69.70	537.33	481.81	599.25
69.80	538.13	482.53	600.14
69.90	538.93	483.24	601.03
70.00	539.73	483.96	601.93
70.10	540.53	484.67	602.82
70.20	541.33	485.39	603.71
70.30	542.13	486.11	604.60
70.40	542.93	486.82	605.49
70.50	543.73	487.54	606.38
70.60	544.53	488.26	607.28
70.70	545.32	488.98	608.17
70.80	546.12	489.69	609.06
70.90	546.92	490.41	609.95
71.00	547.72	491.13	610.84
71.10	548.52	491.84	611.74
71.20	549.32	492.56	612.63
71.30	550.12	493.28	613.52
71.40	550.92	493.99	614.41
71.50	551.72	494.71	615.30
71.60	552.52	495.43	616.20
71.70	553.32	496.15	617.09
71.80	554.12	496.86	617.98
71.90	554.92	497.58	618.87
72.00	555.72	498.30	619.77
72.10	556.52	499.01	620.66
72.20	557.32	499.73	621.55
72.30	558.12	500.45	622.44
72.40	558.92	501.17	623.34
72.50	559.72	501.88	624.23
72.60	560.52	502.60	625.12
72.70	561.32	503.32	626.01
72.80	562.12	504.04	626.91
72.90	562.93	504.75	627.80
73.00	563.73	505.47	628.69
73.10	564.53	506.19	629.59
73.20	565.33	506.91	630.48
73.30	566.13	507.63	631.37
73.40	566.93	508.34	632.26
73.50	567.73	509.06	633.16
73.60	568.53	509.78	634.05
73.70	569.33	510.50	634.94
73.80	570.13	511.22	635.84
73.90	570.93	511.93	636.73
74.00	571.73	512.65	637.62
74.10	572.53	513.37	638.52
74.20	573.34	514.09	639.41
74.30	574.14	514.81	640.30
74.40	574.94	515.52	641.20
74.50	575.74	516.24	642.09
74.60	576.54	516.96	642.98
74.70	577.34	517.68	643.88
74.80	578.14	518.40	644.77
74.90	578.94	519.12	645.67
75.00	579.74	519.83	646.56
75.10	580.55	520.55	647.45
75.20	581.35	521.27	648.35
75.30	582.15	521.99	649.24
75.40	582.95	522.71	650.14
75.50	583.75	523.43	651.03
75.60	584.55	524.14	651.92
75.70	585.35	524.86	652.82
75.80	586.16	525.58	653.71
75.90	586.96	526.30	654.61
76.00	587.76	527.02	655.50
76.10	588.56	527.74	656.39
76.20	589.36	528.46	657.29
76.30	590.16	529.18	658.18
76.40	590.97	529.89	659.08
76.50	591.77	530.61	659.97
76.60	592.57	531.33	660.87
76.70	593.37	532.05	661.76
76.80	594.17	532.77	662.66
76.90	594.98	533.49	663.55
77.00	595.78	534.21	664.44
77.10	596.58	534.93	665.34
77.20	597.38	535.65	666.23
77.30	598.18	536.37	667.13
77.40	598.99	537.08	668.02
77.50	599.79	537.80	668.92
77.60	600.59	538.52	669.81
77.70	601.39	539.24	670.71
77.80	602.20	539.96	671.60
77.90	603.00	540.68	672.50
78.00	603.80	541.40	673.39
78.10	604.60	542.12	674.29
78.20	605.41	542.84	675.18
78.30	606.21	543.56	676.08
78.40	607.01	544.28	676.97
78.50	607.81	545.00	677.87
78.60	608.62	545.72	678.76
78.70	609.42	546.44	679.66
78.80	610.22	547.16	680.56
78.90	611.02	547.88	681.45
79.00	611.83	548.60	682.35
79.10	612.63	549.32	683.24
79.20	613.43	550.04	684.14
79.30	614.24	550.76	685.03
79.40	615.04	551.48	685.93
79.50	615.84	552.20	686.82
79.60	616.65	552.92	687.72
79.70	617.45	553.64	688.62
79.80	618.25	554.36	689.51
79.90	619.05	555.08	690.41
80.00	619.86	555.80	691.30
80.10	620.66	556.52	692.20
80.20	621.46	557.24	693.10
80.30	622.27	557.96	693.99
80.40	623.07	558.68	694.89
80.50	623.87	559.40	695.78
80.60	624.68	560.12	696.68
80.70	625.48	560.84	697.58
80.80	626.28	561.56	698.47
80.90	627.09	562.28	699.37
81.00	627.89	563.00	700.26
81.10	628.70	563.72	701.16
81.20	629.50	564.44	702.06
81.30	630.30	565.16	702.95
81.40	631.11	565.88	703.85
81.50	631.91	566.60	704.75
81.60	632.71	567.32	705.64
81.70	633.52	568.04	706.54
81.80	634.32	568.76	707.44
81.90	635.13	569.48	708.33
82.00	635.93	570.20	709.23
82.10	636.73	570.92	710.13
82.20	637.54	571.65	711.02
82.30	638.34	572.37	711.92
82.40	639.15	573.09	712.82
82.50	639.95	573.81	713.71
