# Supplementary material
Source: MDPI journal article supplement (https://www.mdpi.com/2504-446X/8/3/115)
Supplement: s1 [file s1 › Table S2 Caiman crocodilus Framework.csv]

Head Length (cm)	Fit (estimation) (cm)	Lower limit (95% confidence interval) (cm)	Upper limit (95% confidence interval) (cm)
2.70	17.57	15.49	19.94
2.80	18.27	16.11	20.72
2.90	18.96	16.72	21.51
3.00	19.66	17.34	22.29
3.10	20.36	17.95	23.08
3.20	21.06	18.57	23.87
3.30	21.76	19.19	24.66
3.40	22.46	19.82	25.46
3.50	23.16	20.44	26.25
3.60	23.87	21.06	27.05
3.70	24.57	21.69	27.84
3.80	25.28	22.31	28.64
3.90	25.99	22.94	29.44
4.00	26.70	23.57	30.24
4.10	27.41	24.20	31.05
4.20	28.12	24.83	31.85
4.30	28.83	25.46	32.65
4.40	29.55	26.09	33.46
4.50	30.26	26.73	34.27
4.60	30.98	27.36	35.08
4.70	31.70	28.00	35.89
4.80	32.41	28.63	36.70
4.90	33.13	29.27	37.51
5.00	33.85	29.91	38.32
5.10	34.57	30.55	39.14
5.20	35.30	31.18	39.95
5.30	36.02	31.83	40.77
5.40	36.74	32.47	41.58
5.50	37.47	33.11	42.40
5.60	38.19	33.75	43.22
5.70	38.92	34.39	44.04
5.80	39.65	35.04	44.86
5.90	40.37	35.68	45.68
6.00	41.10	36.33	46.50
6.10	41.83	36.97	47.33
6.20	42.56	37.62	48.15
6.30	43.29	38.27	48.98
6.40	44.02	38.92	49.80
6.50	44.76	39.56	50.63
6.60	45.49	40.21	51.46
6.70	46.22	40.86	52.28
6.80	46.96	41.51	53.11
6.90	47.69	42.16	53.94
7.00	48.43	42.82	54.77
7.10	49.16	43.47	55.61
7.20	49.90	44.12	56.44
7.30	50.64	44.78	57.27
7.40	51.38	45.43	58.10
7.50	52.12	46.08	58.94
7.60	52.86	46.74	59.77
7.70	53.60	47.39	60.61
7.80	54.34	48.05	61.45
7.90	55.08	48.71	62.28
8.00	55.82	49.37	63.12
8.10	56.56	50.02	63.96
8.20	57.31	50.68	64.80
8.30	58.05	51.34	65.64
8.40	58.80	52.00	66.48
8.50	59.54	52.66	67.32
8.60	60.29	53.32	68.16
8.70	61.03	53.98	69.00
8.80	61.78	54.64	69.85
8.90	62.53	55.30	70.69
9.00	63.27	55.97	71.53
9.10	64.02	56.63	72.38
9.20	64.77	57.29	73.23
9.30	65.52	57.96	74.07
9.40	66.27	58.62	74.92
9.50	67.02	59.28	75.77
9.60	67.77	59.95	76.61
9.70	68.52	60.62	77.46
9.80	69.27	61.28	78.31
9.90	70.03	61.95	79.16
10.00	70.78	62.61	80.01
10.10	71.53	63.28	80.86
10.20	72.29	63.95	81.71
10.30	73.04	64.62	82.56
10.40	73.80	65.29	83.42
10.50	74.55	65.95	84.27
10.60	75.31	66.62	85.12
10.70	76.06	67.29	85.98
10.80	76.82	67.96	86.83
10.90	77.58	68.63	87.69
11.00	78.33	69.30	88.54
11.10	79.09	69.97	89.40
11.20	79.85	70.65	90.25
11.30	80.61	71.32	91.11
11.40	81.37	71.99	91.97
11.50	82.13	72.66	92.83
11.60	82.89	73.34	93.68
11.70	83.65	74.01	94.54
11.80	84.41	74.68	95.40
11.90	85.17	75.36	96.26
12.00	85.93	76.03	97.12
12.10	86.70	76.71	97.98
12.20	87.46	77.38	98.85
12.30	88.22	78.06	99.71
12.40	88.98	78.73	100.57
12.50	89.75	79.41	101.43
12.60	90.51	80.09	102.30
12.70	91.28	80.76	103.16
12.80	92.04	81.44	104.02
12.90	92.81	82.12	104.89
13.00	93.57	82.79	105.75
13.10	94.34	83.47	106.62
13.20	95.10	84.15	107.48
13.30	95.87	84.83	108.35
13.40	96.64	85.51	109.22
13.50	97.41	86.19	110.08
13.60	98.17	86.87	110.95
13.70	98.94	87.55	111.82
13.80	99.71	88.23	112.69
13.90	100.48	88.91	113.56
14.00	101.25	89.59	114.43
14.10	102.02	90.27	115.30
14.20	102.79	90.95	116.17
14.30	103.56	91.64	117.04
14.40	104.33	92.32	117.91
14.50	105.10	93.00	118.78
14.60	105.87	93.68	119.65
14.70	106.64	94.37	120.52
14.80	107.42	95.05	121.39
14.90	108.19	95.73	122.27
15.00	108.96	96.42	123.14
15.10	109.73	97.10	124.01
15.20	110.51	97.78	124.89
15.30	111.28	98.47	125.76
15.40	112.06	99.15	126.64
15.50	112.83	99.84	127.51
15.60	113.61	100.53	128.39
15.70	114.38	101.21	129.26
15.80	115.16	101.90	130.14
15.90	115.93	102.58	131.02
16.00	116.71	103.27	131.89
16.10	117.48	103.96	132.77
16.20	118.26	104.64	133.65
16.30	119.04	105.33	134.53
16.40	119.81	106.02	135.40
16.50	120.59	106.71	136.28
16.60	121.37	107.40	137.16
16.70	122.15	108.08	138.04
16.80	122.93	108.77	138.92
16.90	123.70	109.46	139.80
17.00	124.48	110.15	140.68
17.10	125.26	110.84	141.56
17.20	126.04	111.53	142.44
17.30	126.82	112.22	143.32
17.40	127.60	112.91	144.21
17.50	128.38	113.60	145.09
17.60	129.16	114.29	145.97
17.70	129.94	114.98	146.85
17.80	130.73	115.67	147.74
17.90	131.51	116.36	148.62
18.00	132.29	117.06	149.50
18.10	133.07	117.75	150.39
18.20	133.85	118.44	151.27
18.30	134.64	119.13	152.16
18.40	135.42	119.82	153.04
18.50	136.20	120.52	153.93
18.60	136.99	121.21	154.81
18.70	137.77	121.90	155.70
18.80	138.55	122.60	156.59
18.90	139.34	123.29	157.47
19.00	140.12	123.98	158.36
19.10	140.91	124.68	159.25
19.20	141.69	125.37	160.14
19.30	142.48	126.07	161.02
19.40	143.26	126.76	161.91
19.50	144.05	127.46	162.80
19.60	144.84	128.15	163.69
19.70	145.62	128.85	164.58
19.80	146.41	129.54	165.47
19.90	147.20	130.24	166.36
20.00	147.98	130.94	167.25
20.10	148.77	131.63	168.14
20.20	149.56	132.33	169.03
20.30	150.35	133.03	169.92
20.40	151.13	133.72	170.81
20.50	151.92	134.42	171.70
20.60	152.71	135.12	172.60
20.70	153.50	135.81	173.49
20.80	154.29	136.51	174.38
20.90	155.08	137.21	175.27
21.00	155.87	137.91	176.17
21.10	156.66	138.61	177.06
21.20	157.45	139.31	177.95
21.30	158.24	140.00	178.85
21.40	159.03	140.70	179.74
21.50	159.82	141.40	180.63
21.60	160.61	142.10	181.53
21.70	161.40	142.80	182.42
21.80	162.19	143.50	183.32
21.90	162.99	144.20	184.22
22.00	163.78	144.90	185.11
22.10	164.57	145.60	186.01
22.20	165.36	146.30	186.90
22.30	166.15	147.00	187.80
22.40	166.95	147.70	188.70
22.50	167.74	148.41	189.59
22.60	168.53	149.11	190.49
22.70	169.33	149.81	191.39
22.80	170.12	150.51	192.29
22.90	170.92	151.21	193.19
23.00	171.71	151.91	194.08
23.10	172.50	152.62	194.98
23.20	173.30	153.32	195.88
23.30	174.09	154.02	196.78
23.40	174.89	154.72	197.68
23.50	175.68	155.43	198.58
23.60	176.48	156.13	199.48
23.70	177.28	156.83	200.38
23.80	178.07	157.54	201.28
23.90	178.87	158.24	202.18
24.00	179.66	158.95	203.08
24.10	180.46	159.65	203.98
24.20	181.26	160.35	204.89
24.30	182.05	161.06	205.79
24.40	182.85	161.76	206.69
24.50	183.65	162.47	207.59
24.60	184.45	163.17	208.50
24.70	185.24	163.88	209.40
24.80	186.04	164.58	210.30
24.90	186.84	165.29	211.20
25.00	187.64	165.99	212.11
25.10	188.44	166.70	213.01
25.20	189.24	167.41	213.92
25.30	190.04	168.11	214.82
25.40	190.84	168.82	215.72
25.50	191.64	169.52	216.63
25.60	192.44	170.23	217.53
25.70	193.23	170.94	218.44
25.80	194.04	171.65	219.35
25.90	194.84	172.35	220.25
26.00	195.64	173.06	221.16
26.10	196.44	173.77	222.06
26.20	197.24	174.48	222.97
26.30	198.04	175.18	223.88
26.40	198.84	175.89	224.78
26.50	199.64	176.60	225.69
26.60	200.44	177.31	226.60
26.70	201.25	178.02	227.51
26.80	202.05	178.72	228.41
26.90	202.85	179.43	229.32
27.00	203.65	180.14	230.23
27.10	204.45	180.85	231.14
27.20	205.26	181.56	232.05
27.30	206.06	182.27	232.96
27.40	206.86	182.98	233.87
27.50	207.67	183.69	234.77
27.60	208.47	184.40	235.68
27.70	209.27	185.11	236.59
27.80	210.08	185.82	237.50
27.90	210.88	186.53	238.41
28.00	211.69	187.24	239.32
28.10	212.49	187.95	240.24
28.20	213.30	188.66	241.15
28.30	214.10	189.37	242.06
28.40	214.91	190.08	242.97
28.50	215.71	190.80	243.88
28.60	216.52	191.51	244.79
28.70	217.32	192.22	245.70
28.80	218.13	192.93	246.62
28.90	218.93	193.64	247.53
29.00	219.74	194.35	248.44
29.10	220.55	195.07	249.36
29.20	221.35	195.78	250.27
29.30	222.16	196.49	251.18
29.40	222.97	197.20	252.10
29.50	223.77	197.92	253.01
29.60	224.58	198.63	253.92
29.70	225.39	199.34	254.84
29.80	226.20	200.06	255.75
29.90	227.00	200.77	256.67
30.00	227.81	201.48	257.58
30.10	228.62	202.20	258.50
30.20	229.43	202.91	259.41
30.30	230.24	203.62	260.33
30.40	231.04	204.34	261.24
30.50	231.85	205.05	262.16
30.60	232.66	205.77	263.07
30.70	233.47	206.48	263.99
30.80	234.28	207.20	264.91
30.90	235.09	207.91	265.82
31.00	235.90	208.62	266.74
31.10	236.71	209.34	267.66
31.20	237.52	210.05	268.57
31.30	238.33	210.77	269.49
31.40	239.14	211.49	270.41
31.50	239.95	212.20	271.33
31.60	240.76	212.92	272.25
31.70	241.57	213.63	273.16
31.80	242.38	214.35	274.08
31.90	243.19	215.06	275.00
32.00	244.00	215.78	275.92
32.10	244.82	216.50	276.84
32.20	245.63	217.21	277.76
32.30	246.44	217.93	278.68
32.40	247.25	218.65	279.60
32.50	248.06	219.36	280.52
32.60	248.88	220.08	281.44
32.70	249.69	220.80	282.36
32.80	250.50	221.52	283.28
32.90	251.31	222.23	284.20
33.00	252.13	222.95	285.12
33.10	252.94	223.67	286.04
33.20	253.75	224.39	286.96
33.30	254.57	225.10	287.88
33.40	255.38	225.82	288.80
33.50	256.19	226.54	289.73
33.60	257.01	227.26	290.65
33.70	257.82	227.98	291.57
33.80	258.63	228.70	292.49
33.90	259.45	229.42	293.41
34.00	260.26	230.13	294.34
34.10	261.08	230.85	295.26
34.20	261.89	231.57	296.18
34.30	262.71	232.29	297.11
34.40	263.52	233.01	298.03
34.50	264.34	233.73	298.95
34.60	265.15	234.45	299.88
34.70	265.97	235.17	300.80
34.80	266.78	235.89	301.72
34.90	267.60	236.61	302.65
35.00	268.42	237.33	303.57
35.10	269.23	238.05	304.50
35.20	270.05	238.77	305.42
35.30	270.86	239.49	306.35
35.40	271.68	240.21	307.27
35.50	272.50	240.93	308.20
35.60	273.31	241.65	309.12
35.70	274.13	242.37	310.05
35.80	274.95	243.10	310.98
35.90	275.77	243.82	311.90
36.00	276.58	244.54	312.83
36.10	277.40	245.26	313.75
36.20	278.22	245.98	314.68
36.30	279.04	246.70	315.61
36.40	279.85	247.42	316.53
36.50	280.67	248.15	317.46
36.60	281.49	248.87	318.39
36.70	282.31	249.59	319.32
36.80	283.13	250.31	320.24
36.90	283.95	251.03	321.17
37.00	284.76	251.76	322.10
37.10	285.58	252.48	323.03
37.20	286.40	253.20	323.96
37.30	287.22	253.93	324.88
37.40	288.04	254.65	325.81
37.50	288.86	255.37	326.74
37.60	289.68	256.10	327.67
37.70	290.50	256.82	328.60
37.80	291.32	257.54	329.53
37.90	292.14	258.27	330.46
38.00	292.96	258.99	331.39
38.10	293.78	259.71	332.32
38.20	294.60	260.44	333.25
38.30	295.42	261.16	334.18
38.40	296.24	261.88	335.11
38.50	297.06	262.61	336.04
38.60	297.89	263.33	336.97
38.70	298.71	264.06	337.90
38.80	299.53	264.78	338.83
38.90	300.35	265.51	339.76
39.00	301.17	266.23	340.69
39.10	301.99	266.96	341.63
39.20	302.81	267.68	342.56
39.30	303.64	268.41	343.49
39.40	304.46	269.13	344.42
39.50	305.28	269.86	345.35
39.60	306.10	270.58	346.29
39.70	306.93	271.31	347.22
39.80	307.75	272.03	348.15
39.90	308.57	272.76	349.08
40.00	309.39	273.49	350.02
40.10	310.22	274.21	350.95
40.20	311.04	274.94	351.88
40.30	311.86	275.66	352.82
40.40	312.69	276.39	353.75
40.50	313.51	277.12	354.68
40.60	314.33	277.84	355.62
40.70	315.16	278.57	356.55
40.80	315.98	279.30	357.49
40.90	316.81	280.02	358.42
41.00	317.63	280.75	359.36
41.10	318.45	281.48	360.29
41.20	319.28	282.20	361.22
41.30	320.10	282.93	362.16
41.40	320.93	283.66	363.09
41.50	321.75	284.39	364.03
41.60	322.58	285.11	364.97
41.70	323.40	285.84	365.90
41.80	324.23	286.57	366.84
41.90	325.05	287.30	367.77
42.00	325.88	288.03	368.71
42.10	326.71	288.75	369.65
42.20	327.53	289.48	370.58
42.30	328.36	290.21	371.52
42.40	329.18	290.94	372.46
42.50	330.01	291.67	373.39
42.60	330.84	292.40	374.33
42.70	331.66	293.12	375.27
42.80	332.49	293.85	376.20
42.90	333.32	294.58	377.14
43.00	334.14	295.31	378.08
43.10	334.97	296.04	379.02
43.20	335.80	296.77	379.95
43.30	336.62	297.50	380.89
43.40	337.45	298.23	381.83
43.50	338.28	298.96	382.77
43.60	339.11	299.69	383.71
43.70	339.93	300.42	384.65
43.80	340.76	301.15	385.58
43.90	341.59	301.88	386.52
44.00	342.42	302.61	387.46
44.10	343.24	303.34	388.40
44.20	344.07	304.07	389.34
44.30	344.90	304.80	390.28
44.40	345.73	305.53	391.22
44.50	346.56	306.26	392.16
44.60	347.39	306.99	393.10
44.70	348.22	307.72	394.04
44.80	349.04	308.45	394.98
44.90	349.87	309.18	395.92
45.00	350.70	309.91	396.86
45.10	351.53	310.64	397.80
45.20	352.36	311.37	398.74
45.30	353.19	312.11	399.68
45.40	354.02	312.84	400.63
45.50	354.85	313.57	401.57
45.60	355.68	314.30	402.51
45.70	356.51	315.03	403.45
45.80	357.34	315.76	404.39
45.90	358.17	316.50	405.33
46.00	359.00	317.23	406.27
46.10	359.83	317.96	407.22
46.20	360.66	318.69	408.16
46.30	361.49	319.42	409.10
46.40	362.32	320.16	410.04
46.50	363.15	320.89	410.99
46.60	363.99	321.62	411.93
46.70	364.82	322.35	412.87
46.80	365.65	323.09	413.82
46.90	366.48	323.82	414.76
47.00	367.31	324.55	415.70
47.10	368.14	325.29	416.65
47.20	368.97	326.02	417.59
47.30	369.81	326.75	418.53
47.40	370.64	327.48	419.48
47.50	371.47	328.22	420.42
47.60	372.30	328.95	421.37
47.70	373.13	329.69	422.31
47.80	373.97	330.42	423.25
47.90	374.80	331.15	424.20
48.00	375.63	331.89	425.14
48.10	376.46	332.62	426.09
48.20	377.30	333.35	427.03
48.30	378.13	334.09	427.98
48.40	378.96	334.82	428.92
48.50	379.80	335.56	429.87
48.60	380.63	336.29	430.81
48.70	381.46	337.03	431.76
48.80	382.30	337.76	432.71
48.90	383.13	338.49	433.65
49.00	383.96	339.23	434.60
49.10	384.80	339.96	435.54
49.20	385.63	340.70	436.49
49.30	386.47	341.43	437.44
49.40	387.30	342.17	438.38
49.50	388.13	342.90	439.33
49.60	388.97	343.64	440.28
49.70	389.80	344.37	441.22
49.80	390.64	345.11	442.17
49.90	391.47	345.84	443.12
50.00	392.31	346.58	444.07
50.10	393.14	347.32	445.01
50.20	393.98	348.05	445.96
50.30	394.81	348.79	446.91
50.40	395.65	349.52	447.86
50.50	396.48	350.26	448.81
50.60	397.32	351.00	449.75
50.70	398.15	351.73	450.70
50.80	398.99	352.47	451.65
50.90	399.82	353.20	452.60
51.00	400.66	353.94	453.55
51.10	401.50	354.68	454.50
51.20	402.33	355.41	455.45
51.30	403.17	356.15	456.39
51.40	404.01	356.89	457.34
51.50	404.84	357.62	458.29
51.60	405.68	358.36	459.24
51.70	406.51	359.10	460.19
51.80	407.35	359.84	461.14
51.90	408.19	360.57	462.09
52.00	409.02	361.31	463.04
52.10	409.86	362.05	463.99
52.20	410.70	362.78	464.94
52.30	411.54	363.52	465.89
52.40	412.37	364.26	466.84
52.50	413.21	365.00	467.79
52.60	414.05	365.74	468.74
52.70	414.89	366.47	469.69
52.80	415.72	367.21	470.65
52.90	416.56	367.95	471.60
53.00	417.40	368.69	472.55
53.10	418.24	369.43	473.50
53.20	419.08	370.16	474.45
53.30	419.91	370.90	475.40
53.40	420.75	371.64	476.35
53.50	421.59	372.38	477.31
53.60	422.43	373.12	478.26
53.70	423.27	373.86	479.21
53.80	424.11	374.59	480.16
53.90	424.95	375.33	481.11
54.00	425.78	376.07	482.07
54.10	426.62	376.81	483.02
54.20	427.46	377.55	483.97
54.30	428.30	378.29	484.93
54.40	429.14	379.03	485.88
54.50	429.98	379.77	486.83
54.60	430.82	380.51	487.78
54.70	431.66	381.25	488.74
54.80	432.50	381.99	489.69
54.90	433.34	382.73	490.64
55.00	434.18	383.47	491.60
55.10	435.02	384.21	492.55
55.20	435.86	384.95	493.51
55.30	436.70	385.69	494.46
55.40	437.54	386.43	495.41
55.50	438.38	387.17	496.37
55.60	439.22	387.91	497.32
55.70	440.06	388.65	498.28
55.80	440.90	389.39	499.23
55.90	441.74	390.13	500.19
56.00	442.58	390.87	501.14
56.10	443.42	391.61	502.10
56.20	444.27	392.35	503.05
56.30	445.11	393.09	504.01
56.40	445.95	393.83	504.96
56.50	446.79	394.57	505.92
56.60	447.63	395.31	506.87
56.70	448.47	396.05	507.83
56.80	449.31	396.79	508.78
56.90	450.16	397.53	509.74
57.00	451.00	398.28	510.70
57.10	451.84	399.02	511.65
57.20	452.68	399.76	512.61
57.30	453.52	400.50	513.57
57.40	454.37	401.24	514.52
57.50	455.21	401.98	515.48
57.60	456.05	402.73	516.44
57.70	456.89	403.47	517.39
57.80	457.74	404.21	518.35
57.90	458.58	404.95	519.31
58.00	459.42	405.69	520.26
58.10	460.26	406.43	521.22
58.20	461.11	407.18	522.18
58.30	461.95	407.92	523.14
58.40	462.79	408.66	524.09
58.50	463.64	409.40	525.05
58.60	464.48	410.15	526.01
58.70	465.32	410.89	526.97
58.80	466.17	411.63	527.93
58.90	467.01	412.37	528.88
59.00	467.85	413.12	529.84
59.10	468.70	413.86	530.80
59.20	469.54	414.60	531.76
59.30	470.38	415.35	532.72
59.40	471.23	416.09	533.68
59.50	472.07	416.83	534.63
59.60	472.92	417.58	535.59
59.70	473.76	418.32	536.55
59.80	474.61	419.06	537.51
59.90	475.45	419.81	538.47
60.00	476.30	420.55	539.43
60.10	477.14	421.29	540.39
60.20	477.98	422.04	541.35
60.30	478.83	422.78	542.31
60.40	479.67	423.52	543.27
60.50	480.52	424.27	544.23
60.60	481.36	425.01	545.19
60.70	482.21	425.76	546.15
60.80	483.06	426.50	547.11
60.90	483.90	427.24	548.07
61.00	484.75	427.99	549.03
61.10	485.59	428.73	549.99
61.20	486.44	429.48	550.95
61.30	487.28	430.22	551.91
61.40	488.13	430.97	552.87
61.50	488.97	431.71	553.84
61.60	489.82	432.45	554.80
61.70	490.67	433.20	555.76
61.80	491.51	433.94	556.72
61.90	492.36	434.69	557.68
62.00	493.21	435.43	558.64
62.10	494.05	436.18	559.60
62.20	494.90	436.92	560.57
62.30	495.75	437.67	561.53
62.40	496.59	438.41	562.49
62.50	497.44	439.16	563.45
62.60	498.29	439.90	564.42
62.70	499.13	440.65	565.38
62.80	499.98	441.40	566.34
62.90	500.83	442.14	567.30
63.00	501.67	442.89	568.27
63.10	502.52	443.63	569.23
63.20	503.37	444.38	570.19
63.30	504.22	445.12	571.15
63.40	505.06	445.87	572.12
63.50	505.91	446.62	573.08
63.60	506.76	447.36	574.04
63.70	507.61	448.11	575.01
63.80	508.46	448.85	575.97
63.90	509.30	449.60	576.93
64.00	510.15	450.35	577.90
64.10	511.00	451.09	578.86
64.20	511.85	451.84	579.83
64.30	512.70	452.59	580.79
64.40	513.54	453.33	581.75
64.50	514.39	454.08	582.72
64.60	515.24	454.83	583.68
64.70	516.09	455.57	584.65
64.80	516.94	456.32	585.61
64.90	517.79	457.07	586.58
65.00	518.64	457.81	587.54
65.10	519.49	458.56	588.51
65.20	520.34	459.31	589.47
65.30	521.18	460.05	590.44
65.40	522.03	460.80	591.40
65.50	522.88	461.55	592.37
65.60	523.73	462.30	593.33
65.70	524.58	463.04	594.30
65.80	525.43	463.79	595.26
65.90	526.28	464.54	596.23
66.00	527.13	465.29	597.20
66.10	527.98	466.03	598.16
66.20	528.83	466.78	599.13
66.30	529.68	467.53	600.09
66.40	530.53	468.28	601.06
66.50	531.38	469.03	602.03
66.60	532.23	469.77	602.99
66.70	533.08	470.52	603.96
66.80	533.93	471.27	604.93
66.90	534.78	472.02	605.89
67.00	535.63	472.77	606.86
67.10	536.48	473.52	607.83
67.20	537.33	474.26	608.79
67.30	538.19	475.01	609.76
67.40	539.04	475.76	610.73
67.50	539.89	476.51	611.69
67.60	540.74	477.26	612.66
67.70	541.59	478.01	613.63
67.80	542.44	478.76	614.60
67.90	543.29	479.50	615.57
68.00	544.14	480.25	616.53
68.10	545.00	481.00	617.50
68.20	545.85	481.75	618.47
68.30	546.70	482.50	619.44
68.40	547.55	483.25	620.41
68.50	548.40	484.00	621.37
68.60	549.25	484.75	622.34
68.70	550.11	485.50	623.31
68.80	550.96	486.25	624.28
68.90	551.81	487.00	625.25
69.00	552.66	487.75	626.22
69.10	553.51	488.50	627.19
69.20	554.37	489.25	628.15
69.30	555.22	490.00	629.12
69.40	556.07	490.75	630.09
69.50	556.92	491.50	631.06
69.60	557.78	492.25	632.03
69.70	558.63	493.00	633.00
69.80	559.48	493.75	633.97
69.90	560.34	494.50	634.94
70.00	561.19	495.25	635.91
70.10	562.04	496.00	636.88
70.20	562.89	496.75	637.85
70.30	563.75	497.50	638.82
70.40	564.60	498.25	639.79
70.50	565.45	499.00	640.76
70.60	566.31	499.75	641.73
70.70	567.16	500.50	642.70
70.80	568.02	501.25	643.67
70.90	568.87	502.00	644.64
71.00	569.72	502.75	645.61
71.10	570.58	503.50	646.58
71.20	571.43	504.25	647.56
71.30	572.28	505.00	648.53
71.40	573.14	505.76	649.50
71.50	573.99	506.51	650.47
71.60	574.85	507.26	651.44
71.70	575.70	508.01	652.41
71.80	576.56	508.76	653.38
71.90	577.41	509.51	654.36
72.00	578.26	510.26	655.33
72.10	579.12	511.02	656.30
72.20	579.97	511.77	657.27
72.30	580.83	512.52	658.24
72.40	581.68	513.27	659.21
72.50	582.54	514.02	660.19
72.60	583.39	514.77	661.16
72.70	584.25	515.53	662.13
72.80	585.10	516.28	663.10
72.90	585.96	517.03	664.08
73.00	586.81	517.78	665.05
73.10	587.67	518.53	666.02
73.20	588.52	519.29	666.99
73.30	589.38	520.04	667.97
73.40	590.24	520.79	668.94
73.50	591.09	521.54	669.91
73.60	591.95	522.30	670.89
73.70	592.80	523.05	671.86
73.80	593.66	523.80	672.83
73.90	594.51	524.55	673.81
74.00	595.37	525.31	674.78
74.10	596.23	526.06	675.75
74.20	597.08	526.81	676.73
74.30	597.94	527.56	677.70
74.40	598.80	528.32	678.68
74.50	599.65	529.07	679.65
74.60	600.51	529.82	680.62
74.70	601.36	530.58	681.60
74.80	602.22	531.33	682.57
74.90	603.08	532.08	683.55
75.00	603.93	532.84	684.52
75.10	604.79	533.59	685.50
75.20	605.65	534.34	686.47
75.30	606.51	535.10	687.45
75.40	607.36	535.85	688.42
75.50	608.22	536.60	689.40
75.60	609.08	537.36	690.37
75.70	609.93	538.11	691.35
75.80	610.79	538.86	692.32
75.90	611.65	539.62	693.30
76.00	612.51	540.37	694.27
76.10	613.36	541.12	695.25
76.20	614.22	541.88	696.22
76.30	615.08	542.63	697.20
76.40	615.94	543.39	698.17
76.50	616.79	544.14	699.15
76.60	617.65	544.90	700.13
76.70	618.51	545.65	701.10
76.80	619.37	546.40	702.08
76.90	620.23	547.16	703.05
77.00	621.09	547.91	704.03
77.10	621.94	548.67	705.01
77.20	622.80	549.42	705.98
77.30	623.66	550.18	706.96
77.40	624.52	550.93	707.94
77.50	625.38	551.69	708.91
77.60	626.24	552.44	709.89
77.70	627.09	553.19	710.87
77.80	627.95	553.95	711.84
77.90	628.81	554.70	712.82
78.00	629.67	555.46	713.80
78.10	630.53	556.21	714.78
78.20	631.39	556.97	715.75
78.30	632.25	557.72	716.73
78.40	633.11	558.48	717.71
78.50	633.97	559.24	718.69
78.60	634.83	559.99	719.66
78.70	635.69	560.75	720.64
78.80	636.55	561.50	721.62
78.90	637.40	562.26	722.60
79.00	638.26	563.01	723.57
79.10	639.12	563.77	724.55
79.20	639.98	564.52	725.53
79.30	640.84	565.28	726.51
79.40	641.70	566.03	727.49
79.50	642.56	566.79	728.47
79.60	643.42	567.55	729.44
79.70	644.28	568.30	730.42
79.80	645.14	569.06	731.40
79.90	646.00	569.81	732.38
80.00	646.86	570.57	733.36
80.10	647.72	571.33	734.34
80.20	648.59	572.08	735.32
80.30	649.45	572.84	736.30
80.40	650.31	573.60	737.28
80.50	651.17	574.35	738.26
80.60	652.03	575.11	739.23
80.70	652.89	575.86	740.21
80.80	653.75	576.62	741.19
80.90	654.61	577.38	742.17
81.00	655.47	578.13	743.15
81.10	656.33	578.89	744.13
81.20	657.19	579.65	745.11
81.30	658.05	580.40	746.09
81.40	658.92	581.16	747.07
81.50	659.78	581.92	748.05
81.60	660.64	582.68	749.03
81.70	661.50	583.43	750.01
81.80	662.36	584.19	750.99
81.90	663.22	584.95	751.97
82.00	664.08	585.70	752.96
82.10	664.95	586.46	753.94
82.20	665.81	587.22	754.92
82.30	666.67	587.98	755.90
82.40	667.53	588.73	756.88
82.50	668.39	589.49	757.86
