# Supplementary material
Source: MDPI journal article supplement (https://www.mdpi.com/2504-446X/8/3/115)
Supplement: s1 [file s1 › Table S3 Crocodylus acutus Framework.csv]

Head Length (cm)	Fit (estimation) (cm)	Lower limit (95% confidence interval) (cm)	Upper limit (95% confidence interval) (cm)
2.70	16.99	15.42	18.72
2.80	17.63	16.00	19.43
2.90	18.27	16.58	20.14
3.00	18.91	17.16	20.84
3.10	19.55	17.74	21.55
3.20	20.20	18.33	22.26
3.30	20.84	18.91	22.96
3.40	21.48	19.49	23.67
3.50	22.12	20.08	24.38
3.60	22.77	20.66	25.09
3.70	23.41	21.24	25.80
3.80	24.05	21.83	26.51
3.90	24.70	22.41	27.22
4.00	25.34	23.00	27.93
4.10	25.99	23.58	28.64
4.20	26.63	24.17	29.35
4.30	27.28	24.75	30.06
4.40	27.92	25.34	30.77
4.50	28.57	25.92	31.48
4.60	29.21	26.51	32.19
4.70	29.86	27.10	32.90
4.80	30.50	27.68	33.61
4.90	31.15	28.27	34.33
5.00	31.80	28.86	35.04
5.10	32.45	29.44	35.75
5.20	33.09	30.03	36.46
5.30	33.74	30.62	37.18
5.40	34.39	31.21	37.89
5.50	35.03	31.79	38.61
5.60	35.68	32.38	39.32
5.70	36.33	32.97	40.03
5.80	36.98	33.56	40.75
5.90	37.63	34.15	41.46
6.00	38.28	34.74	42.18
6.10	38.93	35.33	42.89
6.20	39.57	35.91	43.61
6.30	40.22	36.50	44.32
6.40	40.87	37.09	45.04
6.50	41.52	37.68	45.75
6.60	42.17	38.27	46.47
6.70	42.82	38.86	47.19
6.80	43.47	39.45	47.90
6.90	44.12	40.04	48.62
7.00	44.77	40.63	49.34
7.10	45.42	41.22	50.05
7.20	46.08	41.81	50.77
7.30	46.73	42.41	51.49
7.40	47.38	43.00	52.20
7.50	48.03	43.59	52.92
7.60	48.68	44.18	53.64
7.70	49.33	44.77	54.36
7.80	49.98	45.36	55.08
7.90	50.63	45.95	55.79
8.00	51.29	46.54	56.51
8.10	51.94	47.14	57.23
8.20	52.59	47.73	57.95
8.30	53.24	48.32	58.67
8.40	53.90	48.91	59.39
8.50	54.55	49.50	60.11
8.60	55.20	50.10	60.83
8.70	55.85	50.69	61.55
8.80	56.51	51.28	62.26
8.90	57.16	51.87	62.98
9.00	57.81	52.47	63.70
9.10	58.47	53.06	64.42
9.20	59.12	53.65	65.14
9.30	59.77	54.25	65.86
9.40	60.43	54.84	66.59
9.50	61.08	55.43	67.31
9.60	61.74	56.03	68.03
9.70	62.39	56.62	68.75
9.80	63.04	57.21	69.47
9.90	63.70	57.81	70.19
10.00	64.35	58.40	70.91
10.10	65.01	59.00	71.63
10.20	65.66	59.59	72.35
10.30	66.32	60.18	73.07
10.40	66.97	60.78	73.80
10.50	67.63	61.37	74.52
10.60	68.28	61.97	75.24
10.70	68.94	62.56	75.96
10.80	69.59	63.16	76.68
10.90	70.25	63.75	77.41
11.00	70.90	64.35	78.13
11.10	71.56	64.94	78.85
11.20	72.22	65.54	79.57
11.30	72.87	66.13	80.30
11.40	73.53	66.73	81.02
11.50	74.18	67.32	81.74
11.60	74.84	67.92	82.46
11.70	75.50	68.51	83.19
11.80	76.15	69.11	83.91
11.90	76.81	69.71	84.63
12.00	77.46	70.30	85.36
12.10	78.12	70.90	86.08
12.20	78.78	71.49	86.80
12.30	79.43	72.09	87.53
12.40	80.09	72.68	88.25
12.50	80.75	73.28	88.98
12.60	81.41	73.88	89.70
12.70	82.06	74.47	90.42
12.80	82.72	75.07	91.15
12.90	83.38	75.67	91.87
13.00	84.03	76.26	92.60
13.10	84.69	76.86	93.32
13.20	85.35	77.46	94.05
13.30	86.01	78.05	94.77
13.40	86.66	78.65	95.50
13.50	87.32	79.25	96.22
13.60	87.98	79.84	96.95
13.70	88.64	80.44	97.67
13.80	89.30	81.04	98.40
13.90	89.95	81.64	99.12
14.00	90.61	82.23	99.85
14.10	91.27	82.83	100.57
14.20	91.93	83.43	101.30
14.30	92.59	84.03	102.02
14.40	93.25	84.62	102.75
14.50	93.91	85.22	103.48
14.60	94.56	85.82	104.20
14.70	95.22	86.42	104.93
14.80	95.88	87.01	105.65
14.90	96.54	87.61	106.38
15.00	97.20	88.21	107.11
15.10	97.86	88.81	107.83
15.20	98.52	89.41	108.56
15.30	99.18	90.00	109.29
15.40	99.84	90.60	110.01
15.50	100.50	91.20	110.74
15.60	101.16	91.80	111.47
15.70	101.82	92.40	112.19
15.80	102.47	93.00	112.92
15.90	103.13	93.60	113.65
16.00	103.79	94.19	114.37
16.10	104.45	94.79	115.10
16.20	105.11	95.39	115.83
16.30	105.77	95.99	116.55
16.40	106.43	96.59	117.28
16.50	107.09	97.19	118.01
16.60	107.75	97.79	118.74
16.70	108.41	98.39	119.46
16.80	109.07	98.99	120.19
16.90	109.74	99.58	120.92
17.00	110.40	100.18	121.65
17.10	111.06	100.78	122.38
17.20	111.72	101.38	123.10
17.30	112.38	101.98	123.83
17.40	113.04	102.58	124.56
17.50	113.70	103.18	125.29
17.60	114.36	103.78	126.02
17.70	115.02	104.38	126.74
17.80	115.68	104.98	127.47
17.90	116.34	105.58	128.20
18.00	117.00	106.18	128.93
18.10	117.66	106.78	129.66
18.20	118.33	107.38	130.39
18.30	118.99	107.98	131.12
18.40	119.65	108.58	131.84
18.50	120.31	109.18	132.57
18.60	120.97	109.78	133.30
18.70	121.63	110.38	134.03
18.80	122.29	110.98	134.76
18.90	122.96	111.58	135.49
19.00	123.62	112.18	136.22
19.10	124.28	112.78	136.95
19.20	124.94	113.38	137.68
19.30	125.60	113.98	138.41
19.40	126.27	114.58	139.14
19.50	126.93	115.18	139.87
19.60	127.59	115.79	140.60
19.70	128.25	116.39	141.33
19.80	128.91	116.99	142.06
19.90	129.58	117.59	142.79
20.00	130.24	118.19	143.52
20.10	130.90	118.79	144.25
20.20	131.56	119.39	144.98
20.30	132.23	119.99	145.71
20.40	132.89	120.59	146.44
20.50	133.55	121.19	147.17
20.60	134.21	121.80	147.90
20.70	134.88	122.40	148.63
20.80	135.54	123.00	149.36
20.90	136.20	123.60	150.09
21.00	136.86	124.20	150.82
21.10	137.53	124.80	151.55
21.20	138.19	125.40	152.28
21.30	138.85	126.01	153.01
21.40	139.52	126.61	153.74
21.50	140.18	127.21	154.47
21.60	140.84	127.81	155.20
21.70	141.51	128.41	155.93
21.80	142.17	129.01	156.66
21.90	142.83	129.62	157.39
22.00	143.49	130.22	158.13
22.10	144.16	130.82	158.86
22.20	144.82	131.42	159.59
22.30	145.49	132.02	160.32
22.40	146.15	132.63	161.05
22.50	146.81	133.23	161.78
22.60	147.48	133.83	162.51
22.70	148.14	134.43	163.25
22.80	148.80	135.03	163.98
22.90	149.47	135.64	164.71
23.00	150.13	136.24	165.44
23.10	150.80	136.84	166.17
23.20	151.46	137.44	166.90
23.30	152.12	138.05	167.64
23.40	152.79	138.65	168.37
23.50	153.45	139.25	169.10
23.60	154.12	139.85	169.83
23.70	154.78	140.46	170.56
23.80	155.44	141.06	171.30
23.90	156.11	141.66	172.03
24.00	156.77	142.26	172.76
24.10	157.44	142.87	173.49
24.20	158.10	143.47	174.22
24.30	158.77	144.07	174.96
24.40	159.43	144.68	175.69
24.50	160.10	145.28	176.42
24.60	160.76	145.88	177.15
24.70	161.42	146.49	177.89
24.80	162.09	147.09	178.62
24.90	162.75	147.69	179.35
25.00	163.42	148.29	180.08
25.10	164.08	148.90	180.82
25.20	164.75	149.50	181.55
25.30	165.41	150.10	182.28
25.40	166.08	150.71	183.02
25.50	166.74	151.31	183.75
25.60	167.41	151.91	184.48
25.70	168.07	152.52	185.22
25.80	168.74	153.12	185.95
25.90	169.40	153.73	186.68
26.00	170.07	154.33	187.42
26.10	170.73	154.93	188.15
26.20	171.40	155.54	188.88
26.30	172.07	156.14	189.62
26.40	172.73	156.74	190.35
26.50	173.40	157.35	191.08
26.60	174.06	157.95	191.82
26.70	174.73	158.55	192.55
26.80	175.39	159.16	193.28
26.90	176.06	159.76	194.02
27.00	176.72	160.37	194.75
27.10	177.39	160.97	195.48
27.20	178.06	161.57	196.22
27.30	178.72	162.18	196.95
27.40	179.39	162.78	197.69
27.50	180.05	163.39	198.42
27.60	180.72	163.99	199.15
27.70	181.39	164.60	199.89
27.80	182.05	165.20	200.62
27.90	182.72	165.80	201.36
28.00	183.38	166.41	202.09
28.10	184.05	167.01	202.82
28.20	184.72	167.62	203.56
28.30	185.38	168.22	204.29
28.40	186.05	168.83	205.03
28.50	186.71	169.43	205.76
28.60	187.38	170.03	206.50
28.70	188.05	170.64	207.23
28.80	188.71	171.24	207.96
28.90	189.38	171.85	208.70
29.00	190.05	172.45	209.43
29.10	190.71	173.06	210.17
29.20	191.38	173.66	210.90
29.30	192.05	174.27	211.64
29.40	192.71	174.87	212.37
29.50	193.38	175.48	213.11
29.60	194.05	176.08	213.84
29.70	194.71	176.69	214.58
29.80	195.38	177.29	215.31
29.90	196.05	177.90	216.05
30.00	196.71	178.50	216.78
30.10	197.38	179.11	217.52
30.20	198.05	179.71	218.25
30.30	198.71	180.32	218.99
30.40	199.38	180.92	219.72
30.50	200.05	181.53	220.46
30.60	200.72	182.13	221.19
30.70	201.38	182.74	221.93
30.80	202.05	183.34	222.66
30.90	202.72	183.95	223.40
31.00	203.38	184.55	224.14
31.10	204.05	185.16	224.87
31.20	204.72	185.77	225.61
31.30	205.39	186.37	226.34
31.40	206.05	186.98	227.08
31.50	206.72	187.58	227.81
31.60	207.39	188.19	228.55
31.70	208.06	188.79	229.29
31.80	208.72	189.40	230.02
31.90	209.39	190.00	230.76
32.00	210.06	190.61	231.49
32.10	210.73	191.22	232.23
32.20	211.39	191.82	232.96
32.30	212.06	192.43	233.70
32.40	212.73	193.03	234.44
32.50	213.40	193.64	235.17
32.60	214.07	194.24	235.91
32.70	214.73	194.85	236.65
32.80	215.40	195.46	237.38
32.90	216.07	196.06	238.12
33.00	216.74	196.67	238.85
33.10	217.41	197.27	239.59
33.20	218.07	197.88	240.33
33.30	218.74	198.49	241.06
33.40	219.41	199.09	241.80
33.50	220.08	199.70	242.54
33.60	220.75	200.30	243.27
33.70	221.41	200.91	244.01
33.80	222.08	201.52	244.75
33.90	222.75	202.12	245.48
34.00	223.42	202.73	246.22
34.10	224.09	203.34	246.96
34.20	224.76	203.94	247.69
34.30	225.42	204.55	248.43
34.40	226.09	205.16	249.17
34.50	226.76	205.76	249.90
34.60	227.43	206.37	250.64
34.70	228.10	206.97	251.38
34.80	228.77	207.58	252.11
34.90	229.44	208.19	252.85
35.00	230.10	208.79	253.59
35.10	230.77	209.40	254.33
35.20	231.44	210.01	255.06
35.30	232.11	210.61	255.80
35.40	232.78	211.22	256.54
35.50	233.45	211.83	257.27
35.60	234.12	212.43	258.01
35.70	234.79	213.04	258.75
35.80	235.45	213.65	259.49
35.90	236.12	214.25	260.22
36.00	236.79	214.86	260.96
36.10	237.46	215.47	261.70
36.20	238.13	216.08	262.44
36.30	238.80	216.68	263.17
36.40	239.47	217.29	263.91
36.50	240.14	217.90	264.65
36.60	240.81	218.50	265.39
36.70	241.48	219.11	266.12
36.80	242.14	219.72	266.86
36.90	242.81	220.32	267.60
37.00	243.48	220.93	268.34
37.10	244.15	221.54	269.07
37.20	244.82	222.15	269.81
37.30	245.49	222.75	270.55
37.40	246.16	223.36	271.29
37.50	246.83	223.97	272.03
37.60	247.50	224.58	272.76
37.70	248.17	225.18	273.50
37.80	248.84	225.79	274.24
37.90	249.51	226.40	274.98
38.00	250.18	227.00	275.72
38.10	250.85	227.61	276.45
38.20	251.52	228.22	277.19
38.30	252.19	228.83	277.93
38.40	252.86	229.43	278.67
38.50	253.53	230.04	279.41
38.60	254.20	230.65	280.15
38.70	254.87	231.26	280.88
38.80	255.54	231.87	281.62
38.90	256.21	232.47	282.36
39.00	256.88	233.08	283.10
39.10	257.55	233.69	283.84
39.20	258.22	234.30	284.58
39.30	258.89	234.90	285.31
39.40	259.56	235.51	286.05
39.50	260.23	236.12	286.79
39.60	260.90	236.73	287.53
39.70	261.57	237.34	288.27
39.80	262.24	237.94	289.01
39.90	262.91	238.55	289.75
40.00	263.58	239.16	290.49
40.10	264.25	239.77	291.22
40.20	264.92	240.37	291.96
40.30	265.59	240.98	292.70
40.40	266.26	241.59	293.44
40.50	266.93	242.20	294.18
40.60	267.60	242.81	294.92
40.70	268.27	243.42	295.66
40.80	268.94	244.02	296.40
40.90	269.61	244.63	297.14
41.00	270.28	245.24	297.88
41.10	270.95	245.85	298.61
41.20	271.62	246.46	299.35
41.30	272.29	247.06	300.09
41.40	272.96	247.67	300.83
41.50	273.63	248.28	301.57
41.60	274.30	248.89	302.31
41.70	274.97	249.50	303.05
41.80	275.64	250.11	303.79
41.90	276.31	250.71	304.53
42.00	276.99	251.32	305.27
42.10	277.66	251.93	306.01
42.20	278.33	252.54	306.75
42.30	279.00	253.15	307.49
42.40	279.67	253.76	308.23
42.50	280.34	254.37	308.97
42.60	281.01	254.97	309.70
42.70	281.68	255.58	310.44
42.80	282.35	256.19	311.18
42.90	283.02	256.80	311.92
43.00	283.69	257.41	312.66
43.10	284.36	258.02	313.40
43.20	285.04	258.63	314.14
43.30	285.71	259.23	314.88
43.40	286.38	259.84	315.62
43.50	287.05	260.45	316.36
43.60	287.72	261.06	317.10
43.70	288.39	261.67	317.84
43.80	289.06	262.28	318.58
43.90	289.73	262.89	319.32
44.00	290.41	263.50	320.06
44.10	291.08	264.11	320.80
44.20	291.75	264.71	321.54
44.30	292.42	265.32	322.28
44.40	293.09	265.93	323.02
44.50	293.76	266.54	323.76
44.60	294.43	267.15	324.50
44.70	295.10	267.76	325.24
44.80	295.78	268.37	325.98
44.90	296.45	268.98	326.72
45.00	297.12	269.59	327.46
45.10	297.79	270.20	328.20
45.20	298.46	270.81	328.94
45.30	299.13	271.41	329.69
45.40	299.81	272.02	330.43
45.50	300.48	272.63	331.17
45.60	301.15	273.24	331.91
45.70	301.82	273.85	332.65
45.80	302.49	274.46	333.39
45.90	303.16	275.07	334.13
46.00	303.84	275.68	334.87
46.10	304.51	276.29	335.61
46.20	305.18	276.90	336.35
46.30	305.85	277.51	337.09
46.40	306.52	278.12	337.83
46.50	307.20	278.73	338.57
46.60	307.87	279.34	339.31
46.70	308.54	279.95	340.05
46.80	309.21	280.56	340.79
46.90	309.88	281.16	341.54
47.00	310.56	281.77	342.28
47.10	311.23	282.38	343.02
47.20	311.90	282.99	343.76
47.30	312.57	283.60	344.50
47.40	313.24	284.21	345.24
47.50	313.92	284.82	345.98
47.60	314.59	285.43	346.72
47.70	315.26	286.04	347.46
47.80	315.93	286.65	348.20
47.90	316.60	287.26	348.94
48.00	317.28	287.87	349.69
48.10	317.95	288.48	350.43
48.20	318.62	289.09	351.17
48.30	319.29	289.70	351.91
48.40	319.97	290.31	352.65
48.50	320.64	290.92	353.39
48.60	321.31	291.53	354.13
48.70	321.98	292.14	354.87
48.80	322.66	292.75	355.62
48.90	323.33	293.36	356.36
49.00	324.00	293.97	357.10
49.10	324.67	294.58	357.84
49.20	325.35	295.19	358.58
49.30	326.02	295.80	359.32
49.40	326.69	296.41	360.06
49.50	327.36	297.02	360.81
49.60	328.04	297.63	361.55
49.70	328.71	298.24	362.29
49.80	329.38	298.85	363.03
49.90	330.05	299.46	363.77
50.00	330.73	300.07	364.51
50.10	331.40	300.68	365.26
50.20	332.07	301.29	366.00
50.30	332.75	301.90	366.74
50.40	333.42	302.51	367.48
50.50	334.09	303.12	368.22
50.60	334.76	303.73	368.97
50.70	335.44	304.34	369.71
50.80	336.11	304.95	370.45
50.90	336.78	305.56	371.19
51.00	337.46	306.17	371.93
51.10	338.13	306.78	372.67
51.20	338.80	307.40	373.42
51.30	339.47	308.01	374.16
51.40	340.15	308.62	374.90
51.50	340.82	309.23	375.64
51.60	341.49	309.84	376.38
51.70	342.17	310.45	377.13
51.80	342.84	311.06	377.87
51.90	343.51	311.67	378.61
52.00	344.19	312.28	379.35
52.10	344.86	312.89	380.10
52.20	345.53	313.50	380.84
52.30	346.21	314.11	381.58
52.40	346.88	314.72	382.32
52.50	347.55	315.33	383.06
52.60	348.23	315.94	383.81
52.70	348.90	316.55	384.55
52.80	349.57	317.17	385.29
52.90	350.25	317.78	386.03
53.00	350.92	318.39	386.78
53.10	351.59	319.00	387.52
53.20	352.27	319.61	388.26
53.30	352.94	320.22	389.00
53.40	353.61	320.83	389.75
53.50	354.29	321.44	390.49
53.60	354.96	322.05	391.23
53.70	355.63	322.66	391.97
53.80	356.31	323.27	392.72
53.90	356.98	323.88	393.46
54.00	357.65	324.50	394.20
54.10	358.33	325.11	394.94
54.20	359.00	325.72	395.69
54.30	359.68	326.33	396.43
54.40	360.35	326.94	397.17
54.50	361.02	327.55	397.92
54.60	361.70	328.16	398.66
54.70	362.37	328.77	399.40
54.80	363.04	329.38	400.14
54.90	363.72	330.00	400.89
55.00	364.39	330.61	401.63
55.10	365.07	331.22	402.37
55.20	365.74	331.83	403.12
55.30	366.41	332.44	403.86
55.40	367.09	333.05	404.60
55.50	367.76	333.66	405.35
55.60	368.44	334.27	406.09
55.70	369.11	334.89	406.83
55.80	369.78	335.50	407.57
55.90	370.46	336.11	408.32
56.00	371.13	336.72	409.06
56.10	371.81	337.33	409.80
56.20	372.48	337.94	410.55
56.30	373.15	338.55	411.29
56.40	373.83	339.16	412.03
56.50	374.50	339.78	412.78
56.60	375.18	340.39	413.52
56.70	375.85	341.00	414.26
56.80	376.52	341.61	415.01
56.90	377.20	342.22	415.75
57.00	377.87	342.83	416.49
57.10	378.55	343.45	417.24
57.20	379.22	344.06	417.98
57.30	379.90	344.67	418.72
57.40	380.57	345.28	419.47
57.50	381.24	345.89	420.21
57.60	381.92	346.50	420.95
57.70	382.59	347.11	421.70
57.80	383.27	347.73	422.44
57.90	383.94	348.34	423.18
58.00	384.62	348.95	423.93
58.10	385.29	349.56	424.67
58.20	385.97	350.17	425.42
58.30	386.64	350.79	426.16
58.40	387.31	351.40	426.90
58.50	387.99	352.01	427.65
58.60	388.66	352.62	428.39
58.70	389.34	353.23	429.13
58.80	390.01	353.84	429.88
58.90	390.69	354.46	430.62
59.00	391.36	355.07	431.37
59.10	392.04	355.68	432.11
59.20	392.71	356.29	432.85
59.30	393.39	356.90	433.60
59.40	394.06	357.52	434.34
59.50	394.74	358.13	435.09
59.60	395.41	358.74	435.83
59.70	396.08	359.35	436.57
59.80	396.76	359.96	437.32
59.90	397.43	360.58	438.06
60.00	398.11	361.19	438.81
60.10	398.78	361.80	439.55
60.20	399.46	362.41	440.29
60.30	400.13	363.02	441.04
60.40	400.81	363.64	441.78
60.50	401.48	364.25	442.53
60.60	402.16	364.86	443.27
60.70	402.83	365.47	444.01
60.80	403.51	366.08	444.76
60.90	404.18	366.70	445.50
61.00	404.86	367.31	446.25
61.10	405.53	367.92	446.99
61.20	406.21	368.53	447.74
61.30	406.88	369.15	448.48
61.40	407.56	369.76	449.22
61.50	408.23	370.37	449.97
61.60	408.91	370.98	450.71
61.70	409.58	371.60	451.46
61.80	410.26	372.21	452.20
61.90	410.93	372.82	452.95
62.00	411.61	373.43	453.69
62.10	412.29	374.04	454.44
62.20	412.96	374.66	455.18
62.30	413.64	375.27	455.92
62.40	414.31	375.88	456.67
62.50	414.99	376.49	457.41
62.60	415.66	377.11	458.16
62.70	416.34	377.72	458.90
62.80	417.01	378.33	459.65
62.90	417.69	378.94	460.39
63.00	418.36	379.56	461.14
63.10	419.04	380.17	461.88
63.20	419.71	380.78	462.63
63.30	420.39	381.39	463.37
63.40	421.06	382.01	464.12
63.50	421.74	382.62	464.86
63.60	422.42	383.23	465.61
63.70	423.09	383.85	466.35
63.80	423.77	384.46	467.09
63.90	424.44	385.07	467.84
64.00	425.12	385.68	468.58
64.10	425.79	386.30	469.33
64.20	426.47	386.91	470.07
64.30	427.14	387.52	470.82
64.40	427.82	388.13	471.56
64.50	428.50	388.75	472.31
64.60	429.17	389.36	473.05
64.70	429.85	389.97	473.80
64.80	430.52	390.59	474.54
64.90	431.20	391.20	475.29
65.00	431.87	391.81	476.03
65.10	432.55	392.42	476.78
65.20	433.23	393.04	477.52
65.30	433.90	393.65	478.27
65.40	434.58	394.26	479.02
65.50	435.25	394.88	479.76
65.60	435.93	395.49	480.51
65.70	436.61	396.10	481.25
65.80	437.28	396.72	482.00
65.90	437.96	397.33	482.74
66.00	438.63	397.94	483.49
66.10	439.31	398.55	484.23
66.20	439.99	399.17	484.98
66.30	440.66	399.78	485.72
66.40	441.34	400.39	486.47
66.50	442.01	401.01	487.21
66.60	442.69	401.62	487.96
66.70	443.37	402.23	488.70
66.80	444.04	402.85	489.45
66.90	444.72	403.46	490.20
67.00	445.39	404.07	490.94
67.10	446.07	404.69	491.69
67.20	446.75	405.30	492.43
67.30	447.42	405.91	493.18
67.40	448.10	406.52	493.92
67.50	448.77	407.14	494.67
67.60	449.45	407.75	495.41
67.70	450.13	408.36	496.16
67.80	450.80	408.98	496.91
67.90	451.48	409.59	497.65
68.00	452.16	410.20	498.40
68.10	452.83	410.82	499.14
68.20	453.51	411.43	499.89
68.30	454.18	412.04	500.63
68.40	454.86	412.66	501.38
68.50	455.54	413.27	502.13
68.60	456.21	413.88	502.87
68.70	456.89	414.50	503.62
68.80	457.57	415.11	504.36
68.90	458.24	415.73	505.11
69.00	458.92	416.34	505.85
69.10	459.60	416.95	506.60
69.20	460.27	417.57	507.35
69.30	460.95	418.18	508.09
69.40	461.63	418.79	508.84
69.50	462.30	419.41	509.58
69.60	462.98	420.02	510.33
69.70	463.65	420.63	511.08
69.80	464.33	421.25	511.82
69.90	465.01	421.86	512.57
70.00	465.68	422.47	513.31
70.10	466.36	423.09	514.06
70.20	467.04	423.70	514.81
70.30	467.71	424.32	515.55
70.40	468.39	424.93	516.30
70.50	469.07	425.54	517.04
70.60	469.74	426.16	517.79
70.70	470.42	426.77	518.54
70.80	471.10	427.38	519.28
70.90	471.77	428.00	520.03
71.00	472.45	428.61	520.78
71.10	473.13	429.23	521.52
71.20	473.81	429.84	522.27
71.30	474.48	430.45	523.01
71.40	475.16	431.07	523.76
71.50	475.84	431.68	524.51
71.60	476.51	432.29	525.25
71.70	477.19	432.91	526.00
71.80	477.87	433.52	526.75
71.90	478.54	434.14	527.49
72.00	479.22	434.75	528.24
72.10	479.90	435.36	528.99
72.20	480.57	435.98	529.73
72.30	481.25	436.59	530.48
72.40	481.93	437.21	531.23
72.50	482.61	437.82	531.97
72.60	483.28	438.43	532.72
72.70	483.96	439.05	533.47
72.80	484.64	439.66	534.21
72.90	485.31	440.28	534.96
73.00	485.99	440.89	535.70
73.10	486.67	441.50	536.45
73.20	487.34	442.12	537.20
73.30	488.02	442.73	537.94
73.40	488.70	443.35	538.69
73.50	489.38	443.96	539.44
73.60	490.05	444.57	540.18
73.70	490.73	445.19	540.93
73.80	491.41	445.80	541.68
73.90	492.09	446.42	542.43
74.00	492.76	447.03	543.17
74.10	493.44	447.65	543.92
74.20	494.12	448.26	544.67
74.30	494.79	448.87	545.41
74.40	495.47	449.49	546.16
74.50	496.15	450.10	546.91
74.60	496.83	450.72	547.65
74.70	497.50	451.33	548.40
74.80	498.18	451.94	549.15
74.90	498.86	452.56	549.89
75.00	499.54	453.17	550.64
75.10	500.21	453.79	551.39
75.20	500.89	454.40	552.13
75.30	501.57	455.02	552.88
75.40	502.25	455.63	553.63
75.50	502.92	456.25	554.38
75.60	503.60	456.86	555.12
75.70	504.28	457.47	555.87
75.80	504.96	458.09	556.62
75.90	505.63	458.70	557.36
76.00	506.31	459.32	558.11
76.10	506.99	459.93	558.86
76.20	507.67	460.55	559.61
76.30	508.34	461.16	560.35
76.40	509.02	461.78	561.10
76.50	509.70	462.39	561.85
76.60	510.38	463.00	562.59
76.70	511.05	463.62	563.34
76.80	511.73	464.23	564.09
76.90	512.41	464.85	564.84
77.00	513.09	465.46	565.58
77.10	513.76	466.08	566.33
77.20	514.44	466.69	567.08
77.30	515.12	467.31	567.83
77.40	515.80	467.92	568.57
77.50	516.48	468.54	569.32
77.60	517.15	469.15	570.07
77.70	517.83	469.77	570.82
77.80	518.51	470.38	571.56
77.90	519.19	470.99	572.31
78.00	519.86	471.61	573.06
78.10	520.54	472.22	573.81
78.20	521.22	472.84	574.55
78.30	521.90	473.45	575.30
78.40	522.58	474.07	576.05
78.50	523.25	474.68	576.80
78.60	523.93	475.30	577.54
78.70	524.61	475.91	578.29
78.80	525.29	476.53	579.04
78.90	525.97	477.14	579.79
79.00	526.64	477.76	580.53
79.10	527.32	478.37	581.28
79.20	528.00	478.99	582.03
79.30	528.68	479.60	582.78
79.40	529.36	480.22	583.52
79.50	530.03	480.83	584.27
79.60	530.71	481.45	585.02
79.70	531.39	482.06	585.77
79.80	532.07	482.68	586.52
79.90	532.75	483.29	587.26
80.00	533.43	483.91	588.01
80.10	534.10	484.52	588.76
80.20	534.78	485.14	589.51
80.30	535.46	485.75	590.26
80.40	536.14	486.37	591.00
80.50	536.82	486.98	591.75
80.60	537.49	487.60	592.50
80.70	538.17	488.21	593.25
80.80	538.85	488.83	593.99
80.90	539.53	489.44	594.74
81.00	540.21	490.06	595.49
81.10	540.89	490.67	596.24
81.20	541.56	491.29	596.99
81.30	542.24	491.90	597.73
81.40	542.92	492.52	598.48
81.50	543.60	493.13	599.23
81.60	544.28	493.75	599.98
81.70	544.96	494.36	600.73
81.80	545.63	494.98	601.48
81.90	546.31	495.59	602.22
82.00	546.99	496.21	602.97
82.10	547.67	496.82	603.72
82.20	548.35	497.44	604.47
82.30	549.03	498.05	605.22
82.40	549.71	498.67	605.96
82.50	550.38	499.28	606.71
