# Supplementary material
Source: MDPI journal article supplement (https://www.mdpi.com/2504-446X/8/3/115)
Supplement: s1 [file s1 › Table S4 Crocodylus intermedius Framework.csv]

Head Length (cm)	Fit (estimation) (cm)	Lower limit (95% confidence interval) (cm)	Upper limit (95% confidence interval) (cm)
2.70	16.90	14.54	19.64
2.80	17.52	15.08	20.36
2.90	18.15	15.62	21.09
3.00	18.77	16.16	21.81
3.10	19.40	16.70	22.54
3.20	20.02	17.24	23.26
3.30	20.65	17.77	23.98
3.40	21.27	18.31	24.71
3.50	21.90	18.85	25.43
3.60	22.52	19.39	26.15
3.70	23.14	19.93	26.88
3.80	23.77	20.47	27.60
3.90	24.39	21.01	28.32
4.00	25.02	21.55	29.05
4.10	25.64	22.09	29.77
4.20	26.27	22.62	30.49
4.30	26.89	23.16	31.22
4.40	27.52	23.70	31.94
4.50	28.14	24.24	32.67
4.60	28.76	24.78	33.39
4.70	29.39	25.32	34.11
4.80	30.01	25.86	34.84
4.90	30.64	26.39	35.56
5.00	31.26	26.93	36.28
5.10	31.88	27.47	37.01
5.20	32.51	28.01	37.73
5.30	33.13	28.55	38.45
5.40	33.76	29.09	39.18
5.50	34.38	29.63	39.90
5.60	35.00	30.16	40.62
5.70	35.63	30.70	41.35
5.80	36.25	31.24	42.07
5.90	36.88	31.78	42.79
6.00	37.50	32.32	43.52
6.10	38.12	32.85	44.24
6.20	38.75	33.39	44.96
6.30	39.37	33.93	45.69
6.40	40.00	34.47	46.41
6.50	40.62	35.01	47.14
6.60	41.24	35.54	47.86
6.70	41.87	36.08	48.58
6.80	42.49	36.62	49.31
6.90	43.12	37.16	50.03
7.00	43.74	37.69	50.75
7.10	44.36	38.23	51.48
7.20	44.99	38.77	52.20
7.30	45.61	39.31	52.92
7.40	46.23	39.84	53.65
7.50	46.86	40.38	54.37
7.60	47.48	40.92	55.09
7.70	48.10	41.46	55.82
7.80	48.73	41.99	56.54
7.90	49.35	42.53	57.27
8.00	49.98	43.07	57.99
8.10	50.60	43.61	58.71
8.20	51.22	44.14	59.44
8.30	51.85	44.68	60.16
8.40	52.47	45.22	60.88
8.50	53.09	45.76	61.61
8.60	53.72	46.29	62.33
8.70	54.34	46.83	63.06
8.80	54.96	47.37	63.78
8.90	55.59	47.90	64.50
9.00	56.21	48.44	65.23
9.10	56.83	48.98	65.95
9.20	57.46	49.52	66.68
9.30	58.08	50.05	67.40
9.40	58.71	50.59	68.12
9.50	59.33	51.13	68.85
9.60	59.95	51.66	69.57
9.70	60.58	52.20	70.30
9.80	61.20	52.74	71.02
9.90	61.82	53.27	71.74
10.00	62.45	53.81	72.47
10.10	63.07	54.35	73.19
10.20	63.69	54.88	73.92
10.30	64.32	55.42	74.64
10.40	64.94	55.96	75.36
10.50	65.56	56.49	76.09
10.60	66.19	57.03	76.81
10.70	66.81	57.57	77.54
10.80	67.43	58.10	78.26
10.90	68.06	58.64	78.98
11.00	68.68	59.18	79.71
11.10	69.30	59.71	80.43
11.20	69.93	60.25	81.16
11.30	70.55	60.78	81.88
11.40	71.17	61.32	82.61
11.50	71.80	61.86	83.33
11.60	72.42	62.39	84.05
11.70	73.04	62.93	84.78
11.80	73.66	63.47	85.50
11.90	74.29	64.00	86.23
12.00	74.91	64.54	86.95
12.10	75.53	65.07	87.68
12.20	76.16	65.61	88.40
12.30	76.78	66.15	89.12
12.40	77.40	66.68	89.85
12.50	78.03	67.22	90.57
12.60	78.65	67.75	91.30
12.70	79.27	68.29	92.02
12.80	79.90	68.83	92.75
12.90	80.52	69.36	93.47
13.00	81.14	69.90	94.20
13.10	81.77	70.43	94.92
13.20	82.39	70.97	95.64
13.30	83.01	71.51	96.37
13.40	83.63	72.04	97.09
13.50	84.26	72.58	97.82
13.60	84.88	73.11	98.54
13.70	85.50	73.65	99.27
13.80	86.13	74.18	99.99
13.90	86.75	74.72	100.72
14.00	87.37	75.26	101.44
14.10	88.00	75.79	102.17
14.20	88.62	76.33	102.89
14.30	89.24	76.86	103.62
14.40	89.86	77.40	104.34
14.50	90.49	77.93	105.07
14.60	91.11	78.47	105.79
14.70	91.73	79.00	106.52
14.80	92.36	79.54	107.24
14.90	92.98	80.07	107.96
15.00	93.60	80.61	108.69
15.10	94.23	81.15	109.41
15.20	94.85	81.68	110.14
15.30	95.47	82.22	110.86
15.40	96.09	82.75	111.59
15.50	96.72	83.29	112.31
15.60	97.34	83.82	113.04
15.70	97.96	84.36	113.76
15.80	98.59	84.89	114.49
15.90	99.21	85.43	115.21
16.00	99.83	85.96	115.94
16.10	100.45	86.50	116.66
16.20	101.08	87.03	117.39
16.30	101.70	87.57	118.11
16.40	102.32	88.10	118.84
16.50	102.95	88.64	119.56
16.60	103.57	89.17	120.29
16.70	104.19	89.71	121.01
16.80	104.81	90.24	121.74
16.90	105.44	90.78	122.46
17.00	106.06	91.31	123.19
17.10	106.68	91.85	123.92
17.20	107.31	92.38	124.64
17.30	107.93	92.92	125.37
17.40	108.55	93.45	126.09
17.50	109.17	93.99	126.82
17.60	109.80	94.52	127.54
17.70	110.42	95.06	128.27
17.80	111.04	95.59	128.99
17.90	111.66	96.12	129.72
18.00	112.29	96.66	130.44
18.10	112.91	97.19	131.17
18.20	113.53	97.73	131.89
18.30	114.16	98.26	132.62
18.40	114.78	98.80	133.34
18.50	115.40	99.33	134.07
18.60	116.02	99.87	134.79
18.70	116.65	100.40	135.52
18.80	117.27	100.94	136.25
18.90	117.89	101.47	136.97
19.00	118.51	102.00	137.70
19.10	119.14	102.54	138.42
19.20	119.76	103.07	139.15
19.30	120.38	103.61	139.87
19.40	121.01	104.14	140.60
19.50	121.63	104.68	141.32
19.60	122.25	105.21	142.05
19.70	122.87	105.75	142.78
19.80	123.50	106.28	143.50
19.90	124.12	106.81	144.23
20.00	124.74	107.35	144.95
20.10	125.36	107.88	145.68
20.20	125.99	108.42	146.40
20.30	126.61	108.95	147.13
20.40	127.23	109.48	147.86
20.50	127.85	110.02	148.58
20.60	128.48	110.55	149.31
20.70	129.10	111.09	150.03
20.80	129.72	111.62	150.76
20.90	130.34	112.16	151.48
21.00	130.97	112.69	152.21
21.10	131.59	113.22	152.94
21.20	132.21	113.76	153.66
21.30	132.83	114.29	154.39
21.40	133.46	114.83	155.11
21.50	134.08	115.36	155.84
21.60	134.70	115.89	156.56
21.70	135.32	116.43	157.29
21.80	135.95	116.96	158.02
21.90	136.57	117.49	158.74
22.00	137.19	118.03	159.47
22.10	137.82	118.56	160.19
22.20	138.44	119.10	160.92
22.30	139.06	119.63	161.65
22.40	139.68	120.16	162.37
22.50	140.31	120.70	163.10
22.60	140.93	121.23	163.82
22.70	141.55	121.76	164.55
22.80	142.17	122.30	165.28
22.90	142.80	122.83	166.00
23.00	143.42	123.37	166.73
23.10	144.04	123.90	167.45
23.20	144.66	124.43	168.18
23.30	145.28	124.97	168.91
23.40	145.91	125.50	169.63
23.50	146.53	126.03	170.36
23.60	147.15	126.57	171.09
23.70	147.77	127.10	171.81
23.80	148.40	127.63	172.54
23.90	149.02	128.17	173.26
24.00	149.64	128.70	173.99
24.10	150.26	129.23	174.72
24.20	150.89	129.77	175.44
24.30	151.51	130.30	176.17
24.40	152.13	130.83	176.90
24.50	152.75	131.37	177.62
24.60	153.38	131.90	178.35
24.70	154.00	132.43	179.07
24.80	154.62	132.97	179.80
24.90	155.24	133.50	180.53
25.00	155.87	134.03	181.25
25.10	156.49	134.57	181.98
25.20	157.11	135.10	182.71
25.30	157.73	135.63	183.43
25.40	158.36	136.17	184.16
25.50	158.98	136.70	184.89
25.60	159.60	137.23	185.61
25.70	160.22	137.77	186.34
25.80	160.84	138.30	187.07
25.90	161.47	138.83	187.79
26.00	162.09	139.37	188.52
26.10	162.71	139.90	189.24
26.20	163.33	140.43	189.97
26.30	163.96	140.97	190.70
26.40	164.58	141.50	191.42
26.50	165.20	142.03	192.15
26.60	165.82	142.56	192.88
26.70	166.45	143.10	193.60
26.80	167.07	143.63	194.33
26.90	167.69	144.16	195.06
27.00	168.31	144.70	195.78
27.10	168.94	145.23	196.51
27.20	169.56	145.76	197.24
27.30	170.18	146.29	197.96
27.40	170.80	146.83	198.69
27.50	171.42	147.36	199.42
27.60	172.05	147.89	200.14
27.70	172.67	148.43	200.87
27.80	173.29	148.96	201.60
27.90	173.91	149.49	202.32
28.00	174.54	150.02	203.05
28.10	175.16	150.56	203.78
28.20	175.78	151.09	204.50
28.30	176.40	151.62	205.23
28.40	177.02	152.16	205.96
28.50	177.65	152.69	206.69
28.60	178.27	153.22	207.41
28.70	178.89	153.75	208.14
28.80	179.51	154.29	208.87
28.90	180.14	154.82	209.59
29.00	180.76	155.35	210.32
29.10	181.38	155.88	211.05
29.20	182.00	156.42	211.77
29.30	182.62	156.95	212.50
29.40	183.25	157.48	213.23
29.50	183.87	158.01	213.95
29.60	184.49	158.55	214.68
29.70	185.11	159.08	215.41
29.80	185.74	159.61	216.14
29.90	186.36	160.14	216.86
30.00	186.98	160.68	217.59
30.10	187.60	161.21	218.32
30.20	188.22	161.74	219.04
30.30	188.85	162.27	219.77
30.40	189.47	162.81	220.50
30.50	190.09	163.34	221.23
30.60	190.71	163.87	221.95
30.70	191.34	164.40	222.68
30.80	191.96	164.94	223.41
30.90	192.58	165.47	224.13
31.00	193.20	166.00	224.86
31.10	193.82	166.53	225.59
31.20	194.45	167.06	226.32
31.30	195.07	167.60	227.04
31.40	195.69	168.13	227.77
31.50	196.31	168.66	228.50
31.60	196.93	169.19	229.22
31.70	197.56	169.73	229.95
31.80	198.18	170.26	230.68
31.90	198.80	170.79	231.41
32.00	199.42	171.32	232.13
32.10	200.05	171.85	232.86
32.20	200.67	172.39	233.59
32.30	201.29	172.92	234.32
32.40	201.91	173.45	235.04
32.50	202.53	173.98	235.77
32.60	203.16	174.51	236.50
32.70	203.78	175.05	237.22
32.80	204.40	175.58	237.95
32.90	205.02	176.11	238.68
33.00	205.64	176.64	239.41
33.10	206.27	177.17	240.13
33.20	206.89	177.71	240.86
33.30	207.51	178.24	241.59
33.40	208.13	178.77	242.32
33.50	208.75	179.30	243.04
33.60	209.38	179.83	243.77
33.70	210.00	180.37	244.50
33.80	210.62	180.90	245.23
33.90	211.24	181.43	245.95
34.00	211.86	181.96	246.68
34.10	212.49	182.49	247.41
34.20	213.11	183.03	248.14
34.30	213.73	183.56	248.86
34.40	214.35	184.09	249.59
34.50	214.97	184.62	250.32
34.60	215.60	185.15	251.05
34.70	216.22	185.68	251.78
34.80	216.84	186.22	252.50
34.90	217.46	186.75	253.23
35.00	218.09	187.28	253.96
35.10	218.71	187.81	254.69
35.20	219.33	188.34	255.41
35.30	219.95	188.87	256.14
35.40	220.57	189.41	256.87
35.50	221.20	189.94	257.60
35.60	221.82	190.47	258.32
35.70	222.44	191.00	259.05
35.80	223.06	191.53	259.78
35.90	223.68	192.06	260.51
36.00	224.31	192.60	261.24
36.10	224.93	193.13	261.96
36.20	225.55	193.66	262.69
36.30	226.17	194.19	263.42
36.40	226.79	194.72	264.15
36.50	227.42	195.25	264.87
36.60	228.04	195.78	265.60
36.70	228.66	196.32	266.33
36.80	229.28	196.85	267.06
36.90	229.90	197.38	267.79
37.00	230.52	197.91	268.51
37.10	231.15	198.44	269.24
37.20	231.77	198.97	269.97
37.30	232.39	199.50	270.70
37.40	233.01	200.04	271.43
37.50	233.63	200.57	272.15
37.60	234.26	201.10	272.88
37.70	234.88	201.63	273.61
37.80	235.50	202.16	274.34
37.90	236.12	202.69	275.07
38.00	236.74	203.22	275.79
38.10	237.37	203.75	276.52
38.20	237.99	204.29	277.25
38.30	238.61	204.82	277.98
38.40	239.23	205.35	278.71
38.50	239.85	205.88	279.43
38.60	240.48	206.41	280.16
38.70	241.10	206.94	280.89
38.80	241.72	207.47	281.62
38.90	242.34	208.00	282.35
39.00	242.96	208.54	283.07
39.10	243.59	209.07	283.80
39.20	244.21	209.60	284.53
39.30	244.83	210.13	285.26
39.40	245.45	210.66	285.99
39.50	246.07	211.19	286.72
39.60	246.69	211.72	287.44
39.70	247.32	212.25	288.17
39.80	247.94	212.78	288.90
39.90	248.56	213.32	289.63
40.00	249.18	213.85	290.36
40.10	249.80	214.38	291.08
40.20	250.43	214.91	291.81
40.30	251.05	215.44	292.54
40.40	251.67	215.97	293.27
40.50	252.29	216.50	294.00
40.60	252.91	217.03	294.73
40.70	253.54	217.56	295.45
40.80	254.16	218.09	296.18
40.90	254.78	218.63	296.91
41.00	255.40	219.16	297.64
41.10	256.02	219.69	298.37
41.20	256.64	220.22	299.10
41.30	257.27	220.75	299.82
41.40	257.89	221.28	300.55
41.50	258.51	221.81	301.28
41.60	259.13	222.34	302.01
41.70	259.75	222.87	302.74
41.80	260.38	223.40	303.47
41.90	261.00	223.93	304.20
42.00	261.62	224.46	304.92
42.10	262.24	225.00	305.65
42.20	262.86	225.53	306.38
42.30	263.48	226.06	307.11
42.40	264.11	226.59	307.84
42.50	264.73	227.12	308.57
42.60	265.35	227.65	309.29
42.70	265.97	228.18	310.02
42.80	266.59	228.71	310.75
42.90	267.22	229.24	311.48
43.00	267.84	229.77	312.21
43.10	268.46	230.30	312.94
43.20	269.08	230.83	313.67
43.30	269.70	231.36	314.39
43.40	270.32	231.89	315.12
43.50	270.95	232.42	315.85
43.60	271.57	232.96	316.58
43.70	272.19	233.49	317.31
43.80	272.81	234.02	318.04
43.90	273.43	234.55	318.77
44.00	274.06	235.08	319.50
44.10	274.68	235.61	320.22
44.20	275.30	236.14	320.95
44.30	275.92	236.67	321.68
44.40	276.54	237.20	322.41
44.50	277.16	237.73	323.14
44.60	277.79	238.26	323.87
44.70	278.41	238.79	324.60
44.80	279.03	239.32	325.33
44.90	279.65	239.85	326.05
45.00	280.27	240.38	326.78
45.10	280.89	240.91	327.51
45.20	281.52	241.44	328.24
45.30	282.14	241.97	328.97
45.40	282.76	242.50	329.70
45.50	283.38	243.03	330.43
45.60	284.00	243.56	331.16
45.70	284.62	244.10	331.88
45.80	285.25	244.63	332.61
45.90	285.87	245.16	333.34
46.00	286.49	245.69	334.07
46.10	287.11	246.22	334.80
46.20	287.73	246.75	335.53
46.30	288.36	247.28	336.26
46.40	288.98	247.81	336.99
46.50	289.60	248.34	337.72
46.60	290.22	248.87	338.44
46.70	290.84	249.40	339.17
46.80	291.46	249.93	339.90
46.90	292.09	250.46	340.63
47.00	292.71	250.99	341.36
47.10	293.33	251.52	342.09
47.20	293.95	252.05	342.82
47.30	294.57	252.58	343.55
47.40	295.19	253.11	344.28
47.50	295.82	253.64	345.01
47.60	296.44	254.17	345.73
47.70	297.06	254.70	346.46
47.80	297.68	255.23	347.19
47.90	298.30	255.76	347.92
48.00	298.92	256.29	348.65
48.10	299.55	256.82	349.38
48.20	300.17	257.35	350.11
48.30	300.79	257.88	350.84
48.40	301.41	258.41	351.57
48.50	302.03	258.94	352.30
48.60	302.65	259.47	353.03
48.70	303.28	260.00	353.75
48.80	303.90	260.53	354.48
48.90	304.52	261.06	355.21
49.00	305.14	261.59	355.94
49.10	305.76	262.12	356.67
49.20	306.38	262.65	357.40
49.30	307.01	263.18	358.13
49.40	307.63	263.71	358.86
49.50	308.25	264.24	359.59
49.60	308.87	264.77	360.32
49.70	309.49	265.30	361.05
49.80	310.11	265.83	361.78
49.90	310.74	266.36	362.51
50.00	311.36	266.89	363.23
50.10	311.98	267.42	363.96
50.20	312.60	267.95	364.69
50.30	313.22	268.48	365.42
50.40	313.84	269.01	366.15
50.50	314.47	269.54	366.88
50.60	315.09	270.07	367.61
50.70	315.71	270.60	368.34
50.80	316.33	271.13	369.07
50.90	316.95	271.66	369.80
51.00	317.57	272.19	370.53
51.10	318.20	272.72	371.26
51.20	318.82	273.25	371.99
51.30	319.44	273.78	372.72
51.40	320.06	274.31	373.45
51.50	320.68	274.84	374.17
51.60	321.30	275.37	374.90
51.70	321.92	275.90	375.63
51.80	322.55	276.42	376.36
51.90	323.17	276.95	377.09
52.00	323.79	277.48	377.82
52.10	324.41	278.01	378.55
52.20	325.03	278.54	379.28
52.30	325.65	279.07	380.01
52.40	326.28	279.60	380.74
52.50	326.90	280.13	381.47
52.60	327.52	280.66	382.20
52.70	328.14	281.19	382.93
52.80	328.76	281.72	383.66
52.90	329.38	282.25	384.39
53.00	330.01	282.78	385.12
53.10	330.63	283.31	385.85
53.20	331.25	283.84	386.58
53.30	331.87	284.37	387.31
53.40	332.49	284.90	388.04
53.50	333.11	285.43	388.77
53.60	333.73	285.96	389.49
53.70	334.36	286.49	390.22
53.80	334.98	287.02	390.95
53.90	335.60	287.55	391.68
54.00	336.22	288.08	392.41
54.10	336.84	288.60	393.14
54.20	337.46	289.13	393.87
54.30	338.09	289.66	394.60
54.40	338.71	290.19	395.33
54.50	339.33	290.72	396.06
54.60	339.95	291.25	396.79
54.70	340.57	291.78	397.52
54.80	341.19	292.31	398.25
54.90	341.81	292.84	398.98
55.00	342.44	293.37	399.71
55.10	343.06	293.90	400.44
55.20	343.68	294.43	401.17
55.30	344.30	294.96	401.90
55.40	344.92	295.49	402.63
55.50	345.54	296.02	403.36
55.60	346.17	296.54	404.09
55.70	346.79	297.07	404.82
55.80	347.41	297.60	405.55
55.90	348.03	298.13	406.28
56.00	348.65	298.66	407.01
56.10	349.27	299.19	407.74
56.20	349.89	299.72	408.47
56.30	350.52	300.25	409.20
56.40	351.14	300.78	409.93
56.50	351.76	301.31	410.66
56.60	352.38	301.84	411.39
56.70	353.00	302.37	412.12
56.80	353.62	302.90	412.85
56.90	354.25	303.42	413.58
57.00	354.87	303.95	414.31
57.10	355.49	304.48	415.04
57.20	356.11	305.01	415.77
57.30	356.73	305.54	416.50
57.40	357.35	306.07	417.23
57.50	357.97	306.60	417.96
57.60	358.60	307.13	418.69
57.70	359.22	307.66	419.42
57.80	359.84	308.19	420.15
57.90	360.46	308.72	420.88
58.00	361.08	309.24	421.61
58.10	361.70	309.77	422.34
58.20	362.32	310.30	423.07
58.30	362.95	310.83	423.80
58.40	363.57	311.36	424.53
58.50	364.19	311.89	425.26
58.60	364.81	312.42	425.99
58.70	365.43	312.95	426.72
58.80	366.05	313.48	427.45
58.90	366.67	314.01	428.18
59.00	367.30	314.53	428.91
59.10	367.92	315.06	429.64
59.20	368.54	315.59	430.37
59.30	369.16	316.12	431.10
59.40	369.78	316.65	431.83
59.50	370.40	317.18	432.56
59.60	371.02	317.71	433.29
59.70	371.65	318.24	434.02
59.80	372.27	318.77	434.75
59.90	372.89	319.29	435.48
60.00	373.51	319.82	436.21
60.10	374.13	320.35	436.94
60.20	374.75	320.88	437.67
60.30	375.37	321.41	438.40
60.40	376.00	321.94	439.13
60.50	376.62	322.47	439.86
60.60	377.24	323.00	440.59
60.70	377.86	323.53	441.32
60.80	378.48	324.05	442.05
60.90	379.10	324.58	442.78
61.00	379.72	325.11	443.51
61.10	380.35	325.64	444.24
61.20	380.97	326.17	444.97
61.30	381.59	326.70	445.70
61.40	382.21	327.23	446.43
61.50	382.83	327.76	447.16
61.60	383.45	328.28	447.89
61.70	384.07	328.81	448.62
61.80	384.70	329.34	449.35
61.90	385.32	329.87	450.08
62.00	385.94	330.40	450.81
62.10	386.56	330.93	451.55
62.20	387.18	331.46	452.28
62.30	387.80	331.99	453.01
62.40	388.42	332.51	453.74
62.50	389.05	333.04	454.47
62.60	389.67	333.57	455.20
62.70	390.29	334.10	455.93
62.80	390.91	334.63	456.66
62.90	391.53	335.16	457.39
63.00	392.15	335.69	458.12
63.10	392.77	336.21	458.85
63.20	393.40	336.74	459.58
63.30	394.02	337.27	460.31
63.40	394.64	337.80	461.04
63.50	395.26	338.33	461.77
63.60	395.88	338.86	462.50
63.70	396.50	339.39	463.23
63.80	397.12	339.91	463.96
63.90	397.75	340.44	464.69
64.00	398.37	340.97	465.42
64.10	398.99	341.50	466.15
64.20	399.61	342.03	466.88
64.30	400.23	342.56	467.62
64.40	400.85	343.08	468.35
64.50	401.47	343.61	469.08
64.60	402.09	344.14	469.81
64.70	402.72	344.67	470.54
64.80	403.34	345.20	471.27
64.90	403.96	345.73	472.00
65.00	404.58	346.26	472.73
65.10	405.20	346.78	473.46
65.20	405.82	347.31	474.19
65.30	406.44	347.84	474.92
65.40	407.07	348.37	475.65
65.50	407.69	348.90	476.38
65.60	408.31	349.43	477.11
65.70	408.93	349.95	477.84
65.80	409.55	350.48	478.57
65.90	410.17	351.01	479.31
66.00	410.79	351.54	480.04
66.10	411.41	352.07	480.77
66.20	412.04	352.60	481.50
66.30	412.66	353.12	482.23
66.40	413.28	353.65	482.96
66.50	413.90	354.18	483.69
66.60	414.52	354.71	484.42
66.70	415.14	355.24	485.15
66.80	415.76	355.77	485.88
66.90	416.39	356.29	486.61
67.00	417.01	356.82	487.34
67.10	417.63	357.35	488.07
67.20	418.25	357.88	488.81
67.30	418.87	358.41	489.54
67.40	419.49	358.93	490.27
67.50	420.11	359.46	491.00
67.60	420.73	359.99	491.73
67.70	421.36	360.52	492.46
67.80	421.98	361.05	493.19
67.90	422.60	361.58	493.92
68.00	423.22	362.10	494.65
68.10	423.84	362.63	495.38
68.20	424.46	363.16	496.11
68.30	425.08	363.69	496.84
68.40	425.71	364.22	497.58
68.50	426.33	364.74	498.31
68.60	426.95	365.27	499.04
68.70	427.57	365.80	499.77
68.80	428.19	366.33	500.50
68.90	428.81	366.86	501.23
69.00	429.43	367.38	501.96
69.10	430.05	367.91	502.69
69.20	430.68	368.44	503.42
69.30	431.30	368.97	504.15
69.40	431.92	369.50	504.88
69.50	432.54	370.02	505.62
69.60	433.16	370.55	506.35
69.70	433.78	371.08	507.08
69.80	434.40	371.61	507.81
69.90	435.02	372.14	508.54
70.00	435.65	372.66	509.27
70.10	436.27	373.19	510.00
70.20	436.89	373.72	510.73
70.30	437.51	374.25	511.46
70.40	438.13	374.78	512.19
70.50	438.75	375.30	512.93
70.60	439.37	375.83	513.66
70.70	439.99	376.36	514.39
70.80	440.62	376.89	515.12
70.90	441.24	377.42	515.85
71.00	441.86	377.94	516.58
71.10	442.48	378.47	517.31
71.20	443.10	379.00	518.04
71.30	443.72	379.53	518.77
71.40	444.34	380.06	519.51
71.50	444.96	380.58	520.24
71.60	445.59	381.11	520.97
71.70	446.21	381.64	521.70
71.80	446.83	382.17	522.43
71.90	447.45	382.70	523.16
72.00	448.07	383.22	523.89
72.10	448.69	383.75	524.62
72.20	449.31	384.28	525.35
72.30	449.93	384.81	526.09
72.40	450.56	385.33	526.82
72.50	451.18	385.86	527.55
72.60	451.80	386.39	528.28
72.70	452.42	386.92	529.01
72.80	453.04	387.45	529.74
72.90	453.66	387.97	530.47
73.00	454.28	388.50	531.20
73.10	454.90	389.03	531.94
73.20	455.53	389.56	532.67
73.30	456.15	390.08	533.40
73.40	456.77	390.61	534.13
73.50	457.39	391.14	534.86
73.60	458.01	391.67	535.59
73.70	458.63	392.19	536.32
73.80	459.25	392.72	537.05
73.90	459.87	393.25	537.79
74.00	460.50	393.78	538.52
74.10	461.12	394.31	539.25
74.20	461.74	394.83	539.98
74.30	462.36	395.36	540.71
74.40	462.98	395.89	541.44
74.50	463.60	396.42	542.17
74.60	464.22	396.94	542.90
74.70	464.84	397.47	543.64
74.80	465.47	398.00	544.37
74.90	466.09	398.53	545.10
75.00	466.71	399.05	545.83
75.10	467.33	399.58	546.56
75.20	467.95	400.11	547.29
75.30	468.57	400.64	548.02
75.40	469.19	401.16	548.76
75.50	469.81	401.69	549.49
75.60	470.43	402.22	550.22
75.70	471.06	402.75	550.95
75.80	471.68	403.27	551.68
75.90	472.30	403.80	552.41
76.00	472.92	404.33	553.14
76.10	473.54	404.86	553.88
76.20	474.16	405.38	554.61
76.30	474.78	405.91	555.34
76.40	475.40	406.44	556.07
76.50	476.03	406.97	556.80
76.60	476.65	407.49	557.53
76.70	477.27	408.02	558.27
76.80	477.89	408.55	559.00
76.90	478.51	409.08	559.73
77.00	479.13	409.60	560.46
77.10	479.75	410.13	561.19
77.20	480.37	410.66	561.92
77.30	480.99	411.19	562.65
77.40	481.62	411.71	563.39
77.50	482.24	412.24	564.12
77.60	482.86	412.77	564.85
77.70	483.48	413.30	565.58
77.80	484.10	413.82	566.31
77.90	484.72	414.35	567.04
78.00	485.34	414.88	567.78
78.10	485.96	415.41	568.51
78.20	486.58	415.93	569.24
78.30	487.21	416.46	569.97
78.40	487.83	416.99	570.70
78.50	488.45	417.51	571.43
78.60	489.07	418.04	572.17
78.70	489.69	418.57	572.90
78.80	490.31	419.10	573.63
78.90	490.93	419.62	574.36
79.00	491.55	420.15	575.09
79.10	492.18	420.68	575.82
79.20	492.80	421.21	576.56
79.30	493.42	421.73	577.29
79.40	494.04	422.26	578.02
79.50	494.66	422.79	578.75
79.60	495.28	423.31	579.48
79.70	495.90	423.84	580.21
79.80	496.52	424.37	580.95
79.90	497.14	424.90	581.68
80.00	497.77	425.42	582.41
80.10	498.39	425.95	583.14
80.20	499.01	426.48	583.87
80.30	499.63	427.00	584.60
80.40	500.25	427.53	585.34
80.50	500.87	428.06	586.07
80.60	501.49	428.59	586.80
80.70	502.11	429.11	587.53
80.80	502.73	429.64	588.26
80.90	503.36	430.17	589.00
81.00	503.98	430.70	589.73
81.10	504.60	431.22	590.46
81.20	505.22	431.75	591.19
81.30	505.84	432.28	591.92
81.40	506.46	432.80	592.65
81.50	507.08	433.33	593.39
81.60	507.70	433.86	594.12
81.70	508.32	434.38	594.85
81.80	508.95	434.91	595.58
81.90	509.57	435.44	596.31
82.00	510.19	435.97	597.05
82.10	510.81	436.49	597.78
82.20	511.43	437.02	598.51
82.30	512.05	437.55	599.24
82.40	512.67	438.07	599.97
82.50	513.29	438.60	600.71
