# Supplementary material
Source: MDPI journal article supplement (https://www.mdpi.com/2504-446X/8/3/115)
Supplement: s1 [file s1 › Table S5 Crocodylus johnstoni Framework.csv]

Head Length (cm)	Fit (estimation) (cm)	Lower limit (95% confidence interval) (cm)	Upper limit (95% confidence interval) (cm)
2.70	18.60	16.31	21.20
2.80	19.22	16.86	21.91
2.90	19.84	17.40	22.62
3.00	20.46	17.94	23.32
3.10	21.07	18.48	24.02
3.20	21.69	19.02	24.72
3.30	22.30	19.56	25.42
3.40	22.91	20.10	26.12
3.50	23.52	20.63	26.81
3.60	24.13	21.16	27.50
3.70	24.73	21.70	28.19
3.80	25.34	22.23	28.88
3.90	25.94	22.76	29.57
4.00	26.54	23.28	30.26
4.10	27.14	23.81	30.94
4.20	27.74	24.34	31.62
4.30	28.34	24.86	32.30
4.40	28.93	25.38	32.98
4.50	29.53	25.90	33.66
4.60	30.12	26.42	34.33
4.70	30.71	26.94	35.01
4.80	31.30	27.46	35.68
4.90	31.89	27.98	36.35
5.00	32.48	28.50	37.02
5.10	33.07	29.01	37.69
5.20	33.66	29.53	38.36
5.30	34.24	30.04	39.03
5.40	34.82	30.55	39.70
5.50	35.41	31.06	40.36
5.60	35.99	31.57	41.02
5.70	36.57	32.08	41.69
5.80	37.15	32.59	42.35
5.90	37.73	33.10	43.01
6.00	38.31	33.61	43.67
6.10	38.89	34.12	44.33
6.20	39.46	34.62	44.98
6.30	40.04	35.13	45.64
6.40	40.61	35.63	46.29
6.50	41.19	36.13	46.95
6.60	41.76	36.64	47.60
6.70	42.33	37.14	48.25
6.80	42.90	37.64	48.91
6.90	43.48	38.14	49.56
7.00	44.05	38.64	50.21
7.10	44.61	39.14	50.85
7.20	45.18	39.64	51.50
7.30	45.75	40.14	52.15
7.40	46.32	40.63	52.80
7.50	46.88	41.13	53.44
7.60	47.45	41.63	54.09
7.70	48.01	42.12	54.73
7.80	48.58	42.62	55.37
7.90	49.14	43.11	56.02
8.00	49.70	43.60	56.66
8.10	50.27	44.10	57.30
8.20	50.83	44.59	57.94
8.30	51.39	45.08	58.58
8.40	51.95	45.57	59.22
8.50	52.51	46.06	59.85
8.60	53.07	46.55	60.49
8.70	53.62	47.04	61.13
8.80	54.18	47.53	61.76
8.90	54.74	48.02	62.40
9.00	55.30	48.51	63.03
9.10	55.85	48.99	63.67
9.20	56.41	49.48	64.30
9.30	56.96	49.97	64.93
9.40	57.52	50.45	65.57
9.50	58.07	50.94	66.20
9.60	58.62	51.42	66.83
9.70	59.17	51.91	67.46
9.80	59.73	52.39	68.09
9.90	60.28	52.88	68.72
10.00	60.83	53.36	69.34
10.10	61.38	53.84	69.97
10.20	61.93	54.32	70.60
10.30	62.48	54.80	71.23
10.40	63.03	55.29	71.85
10.50	63.57	55.77	72.48
10.60	64.12	56.25	73.10
10.70	64.67	56.73	73.73
10.80	65.22	57.21	74.35
10.90	65.76	57.68	74.97
11.00	66.31	58.16	75.60
11.10	66.85	58.64	76.22
11.20	67.40	59.12	76.84
11.30	67.94	59.60	77.46
11.40	68.49	60.07	78.08
11.50	69.03	60.55	78.70
11.60	69.57	61.03	79.32
11.70	70.12	61.50	79.94
11.80	70.66	61.98	80.56
11.90	71.20	62.45	81.18
12.00	71.74	62.93	81.79
12.10	72.28	63.40	82.41
12.20	72.82	63.87	83.03
12.30	73.36	64.35	83.64
12.40	73.90	64.82	84.26
12.50	74.44	65.29	84.88
12.60	74.98	65.76	85.49
12.70	75.52	66.24	86.10
12.80	76.06	66.71	86.72
12.90	76.60	67.18	87.33
13.00	77.13	67.65	87.94
13.10	77.67	68.12	88.56
13.20	78.21	68.59	89.17
13.30	78.74	69.06	89.78
13.40	79.28	69.53	90.39
13.50	79.81	70.00	91.00
13.60	80.35	70.47	91.61
13.70	80.88	70.94	92.22
13.80	81.42	71.40	92.83
13.90	81.95	71.87	93.44
14.00	82.48	72.34	94.05
14.10	83.02	72.81	94.66
14.20	83.55	73.27	95.27
14.30	84.08	73.74	95.88
14.40	84.61	74.21	96.48
14.50	85.15	74.67	97.09
14.60	85.68	75.14	97.70
14.70	86.21	75.60	98.30
14.80	86.74	76.07	98.91
14.90	87.27	76.53	99.51
15.00	87.80	77.00	100.12
15.10	88.33	77.46	100.72
15.20	88.86	77.92	101.33
15.30	89.39	78.39	101.93
15.40	89.92	78.85	102.53
15.50	90.44	79.31	103.14
15.60	90.97	79.78	103.74
15.70	91.50	80.24	104.34
15.80	92.03	80.70	104.94
15.90	92.55	81.16	105.55
16.00	93.08	81.62	106.15
16.10	93.61	82.08	106.75
16.20	94.13	82.54	107.35
16.30	94.66	83.00	107.95
16.40	95.18	83.47	108.55
16.50	95.71	83.93	109.15
16.60	96.23	84.38	109.75
16.70	96.76	84.84	110.35
16.80	97.28	85.30	110.94
16.90	97.81	85.76	111.54
17.00	98.33	86.22	112.14
17.10	98.85	86.68	112.74
17.20	99.38	87.14	113.34
17.30	99.90	87.60	113.93
17.40	100.42	88.05	114.53
17.50	100.94	88.51	115.13
17.60	101.47	88.97	115.72
17.70	101.99	89.42	116.32
17.80	102.51	89.88	116.91
17.90	103.03	90.34	117.51
18.00	103.55	90.79	118.10
18.10	104.07	91.25	118.70
18.20	104.59	91.71	119.29
18.30	105.11	92.16	119.88
18.40	105.63	92.62	120.48
18.50	106.15	93.07	121.07
18.60	106.67	93.53	121.66
18.70	107.19	93.98	122.26
18.80	107.71	94.43	122.85
18.90	108.23	94.89	123.44
19.00	108.75	95.34	124.03
19.10	109.26	95.80	124.62
19.20	109.78	96.25	125.22
19.30	110.30	96.70	125.81
19.40	110.82	97.15	126.40
19.50	111.33	97.61	126.99
19.60	111.85	98.06	127.58
19.70	112.37	98.51	128.17
19.80	112.88	98.96	128.76
19.90	113.40	99.42	129.35
20.00	113.91	99.87	129.93
20.10	114.43	100.32	130.52
20.20	114.94	100.77	131.11
20.30	115.46	101.22	131.70
20.40	115.97	101.67	132.29
20.50	116.49	102.12	132.87
20.60	117.00	102.57	133.46
20.70	117.52	103.02	134.05
20.80	118.03	103.47	134.64
20.90	118.54	103.92	135.22
21.00	119.06	104.37	135.81
21.10	119.57	104.82	136.39
21.20	120.08	105.27	136.98
21.30	120.59	105.72	137.57
21.40	121.11	106.17	138.15
21.50	121.62	106.61	138.74
21.60	122.13	107.06	139.32
21.70	122.64	107.51	139.91
21.80	123.15	107.96	140.49
21.90	123.67	108.41	141.07
22.00	124.18	108.85	141.66
22.10	124.69	109.30	142.24
22.20	125.20	109.75	142.82
22.30	125.71	110.19	143.41
22.40	126.22	110.64	143.99
22.50	126.73	111.09	144.57
22.60	127.24	111.53	145.15
22.70	127.75	111.98	145.74
22.80	128.26	112.42	146.32
22.90	128.77	112.87	146.90
23.00	129.27	113.31	147.48
23.10	129.78	113.76	148.06
23.20	130.29	114.21	148.64
23.30	130.80	114.65	149.22
23.40	131.31	115.09	149.80
23.50	131.82	115.54	150.38
23.60	132.32	115.98	150.96
23.70	132.83	116.43	151.54
23.80	133.34	116.87	152.12
23.90	133.84	117.31	152.70
24.00	134.35	117.76	153.28
24.10	134.86	118.20	153.86
24.20	135.36	118.65	154.44
24.30	135.87	119.09	155.02
24.40	136.38	119.53	155.60
24.50	136.88	119.97	156.17
24.60	137.39	120.42	156.75
24.70	137.89	120.86	157.33
24.80	138.40	121.30	157.91
24.90	138.90	121.74	158.48
25.00	139.41	122.18	159.06
25.10	139.91	122.63	159.64
25.20	140.42	123.07	160.21
25.30	140.92	123.51	160.79
25.40	141.43	123.95	161.37
25.50	141.93	124.39	161.94
25.60	142.43	124.83	162.52
25.70	142.94	125.27	163.09
25.80	143.44	125.71	163.67
25.90	143.94	126.15	164.24
26.00	144.45	126.59	164.82
26.10	144.95	127.03	165.39
26.20	145.45	127.47	165.97
26.30	145.95	127.91	166.54
26.40	146.46	128.35	167.11
26.50	146.96	128.79	167.69
26.60	147.46	129.23	168.26
26.70	147.96	129.67	168.83
26.80	148.46	130.11	169.41
26.90	148.96	130.55	169.98
27.00	149.47	130.98	170.55
27.10	149.97	131.42	171.13
27.20	150.47	131.86	171.70
27.30	150.97	132.30	172.27
27.40	151.47	132.74	172.84
27.50	151.97	133.17	173.41
27.60	152.47	133.61	173.99
27.70	152.97	134.05	174.56
27.80	153.47	134.49	175.13
27.90	153.97	134.92	175.70
28.00	154.47	135.36	176.27
28.10	154.97	135.80	176.84
28.20	155.47	136.23	177.41
28.30	155.96	136.67	177.98
28.40	156.46	137.11	178.55
28.50	156.96	137.54	179.12
28.60	157.46	137.98	179.69
28.70	157.96	138.42	180.26
28.80	158.46	138.85	180.83
28.90	158.95	139.29	181.40
29.00	159.45	139.72	181.97
29.10	159.95	140.16	182.54
29.20	160.45	140.59	183.11
29.30	160.94	141.03	183.67
29.40	161.44	141.46	184.24
29.50	161.94	141.90	184.81
29.60	162.44	142.33	185.38
29.70	162.93	142.77	185.95
29.80	163.43	143.20	186.51
29.90	163.92	143.63	187.08
30.00	164.42	144.07	187.65
30.10	164.92	144.50	188.22
30.20	165.41	144.94	188.78
30.30	165.91	145.37	189.35
30.40	166.40	145.80	189.92
30.50	166.90	146.24	190.48
30.60	167.39	146.67	191.05
30.70	167.89	147.10	191.61
30.80	168.38	147.54	192.18
30.90	168.88	147.97	192.75
31.00	169.37	148.40	193.31
31.10	169.87	148.83	193.88
31.20	170.36	149.27	194.44
31.30	170.86	149.70	195.01
31.40	171.35	150.13	195.57
31.50	171.84	150.56	196.14
31.60	172.34	150.99	196.70
31.70	172.83	151.43	197.26
31.80	173.32	151.86	197.83
31.90	173.82	152.29	198.39
32.00	174.31	152.72	198.96
32.10	174.80	153.15	199.52
32.20	175.30	153.58	200.08
32.30	175.79	154.01	200.65
32.40	176.28	154.44	201.21
32.50	176.77	154.87	201.77
32.60	177.27	155.30	202.34
32.70	177.76	155.73	202.90
32.80	178.25	156.16	203.46
32.90	178.74	156.59	204.02
33.00	179.23	157.02	204.59
33.10	179.73	157.45	205.15
33.20	180.22	157.88	205.71
33.30	180.71	158.31	206.27
33.40	181.20	158.74	206.83
33.50	181.69	159.17	207.39
33.60	182.18	159.60	207.96
33.70	182.67	160.03	208.52
33.80	183.16	160.46	209.08
33.90	183.65	160.89	209.64
34.00	184.14	161.32	210.20
34.10	184.63	161.75	210.76
34.20	185.12	162.17	211.32
34.30	185.61	162.60	211.88
34.40	186.10	163.03	212.44
34.50	186.59	163.46	213.00
34.60	187.08	163.89	213.56
34.70	187.57	164.32	214.12
34.80	188.06	164.74	214.68
34.90	188.55	165.17	215.24
35.00	189.04	165.60	215.80
35.10	189.53	166.03	216.36
35.20	190.02	166.45	216.92
35.30	190.50	166.88	217.47
35.40	190.99	167.31	218.03
35.50	191.48	167.73	218.59
35.60	191.97	168.16	219.15
35.70	192.46	168.59	219.71
35.80	192.95	169.01	220.27
35.90	193.43	169.44	220.82
36.00	193.92	169.87	221.38
36.10	194.41	170.29	221.94
36.20	194.90	170.72	222.50
36.30	195.38	171.15	223.05
36.40	195.87	171.57	223.61
36.50	196.36	172.00	224.17
36.60	196.84	172.42	224.72
36.70	197.33	172.85	225.28
36.80	197.82	173.27	225.84
36.90	198.30	173.70	226.39
37.00	198.79	174.12	226.95
37.10	199.28	174.55	227.51
37.20	199.76	174.97	228.06
37.30	200.25	175.40	228.62
37.40	200.73	175.82	229.17
37.50	201.22	176.25	229.73
37.60	201.71	176.67	230.29
37.70	202.19	177.10	230.84
37.80	202.68	177.52	231.40
37.90	203.16	177.95	231.95
38.00	203.65	178.37	232.51
38.10	204.13	178.79	233.06
38.20	204.62	179.22	233.62
38.30	205.10	179.64	234.17
38.40	205.59	180.07	234.72
38.50	206.07	180.49	235.28
38.60	206.56	180.91	235.83
38.70	207.04	181.34	236.39
38.80	207.52	181.76	236.94
38.90	208.01	182.18	237.49
39.00	208.49	182.60	238.05
39.10	208.98	183.03	238.60
39.20	209.46	183.45	239.16
39.30	209.94	183.87	239.71
39.40	210.43	184.30	240.26
39.50	210.91	184.72	240.81
39.60	211.39	185.14	241.37
39.70	211.88	185.56	241.92
39.80	212.36	185.99	242.47
39.90	212.84	186.41	243.02
40.00	213.32	186.83	243.58
40.10	213.81	187.25	244.13
40.20	214.29	187.67	244.68
40.30	214.77	188.09	245.23
40.40	215.25	188.52	245.79
40.50	215.74	188.94	246.34
40.60	216.22	189.36	246.89
40.70	216.70	189.78	247.44
40.80	217.18	190.20	247.99
40.90	217.66	190.62	248.54
41.00	218.15	191.04	249.09
41.10	218.63	191.46	249.64
41.20	219.11	191.88	250.20
41.30	219.59	192.31	250.75
41.40	220.07	192.73	251.30
41.50	220.55	193.15	251.85
41.60	221.03	193.57	252.40
41.70	221.51	193.99	252.95
41.80	221.99	194.41	253.50
41.90	222.48	194.83	254.05
42.00	222.96	195.25	254.60
42.10	223.44	195.67	255.15
42.20	223.92	196.09	255.70
42.30	224.40	196.51	256.25
42.40	224.88	196.93	256.80
42.50	225.36	197.35	257.35
42.60	225.84	197.76	257.89
42.70	226.32	198.18	258.44
42.80	226.80	198.60	258.99
42.90	227.28	199.02	259.54
43.00	227.76	199.44	260.09
43.10	228.23	199.86	260.64
43.20	228.71	200.28	261.19
43.30	229.19	200.70	261.73
43.40	229.67	201.12	262.28
43.50	230.15	201.53	262.83
43.60	230.63	201.95	263.38
43.70	231.11	202.37	263.93
43.80	231.59	202.79	264.47
43.90	232.07	203.21	265.02
44.00	232.54	203.63	265.57
44.10	233.02	204.04	266.12
44.20	233.50	204.46	266.66
44.30	233.98	204.88	267.21
44.40	234.46	205.30	267.76
44.50	234.93	205.71	268.31
44.60	235.41	206.13	268.85
44.70	235.89	206.55	269.40
44.80	236.37	206.97	269.95
44.90	236.85	207.38	270.49
45.00	237.32	207.80	271.04
45.10	237.80	208.22	271.58
45.20	238.28	208.64	272.13
45.30	238.75	209.05	272.68
45.40	239.23	209.47	273.22
45.50	239.71	209.89	273.77
45.60	240.19	210.30	274.31
45.70	240.66	210.72	274.86
45.80	241.14	211.14	275.41
45.90	241.61	211.55	275.95
46.00	242.09	211.97	276.50
46.10	242.57	212.38	277.04
46.20	243.04	212.80	277.59
46.30	243.52	213.22	278.13
46.40	244.00	213.63	278.68
46.50	244.47	214.05	279.22
46.60	244.95	214.46	279.77
46.70	245.42	214.88	280.31
46.80	245.90	215.29	280.85
46.90	246.37	215.71	281.40
47.00	246.85	216.13	281.94
47.10	247.33	216.54	282.49
47.20	247.80	216.96	283.03
47.30	248.28	217.37	283.57
47.40	248.75	217.79	284.12
47.50	249.23	218.20	284.66
47.60	249.70	218.62	285.21
47.70	250.18	219.03	285.75
47.80	250.65	219.45	286.29
47.90	251.12	219.86	286.84
48.00	251.60	220.27	287.38
48.10	252.07	220.69	287.92
48.20	252.55	221.10	288.46
48.30	253.02	221.52	289.01
48.40	253.50	221.93	289.55
48.50	253.97	222.35	290.09
48.60	254.44	222.76	290.64
48.70	254.92	223.17	291.18
48.80	255.39	223.59	291.72
48.90	255.87	224.00	292.26
49.00	256.34	224.41	292.80
49.10	256.81	224.83	293.35
49.20	257.29	225.24	293.89
49.30	257.76	225.66	294.43
49.40	258.23	226.07	294.97
49.50	258.71	226.48	295.51
49.60	259.18	226.89	296.05
49.70	259.65	227.31	296.60
49.80	260.12	227.72	297.14
49.90	260.60	228.13	297.68
50.00	261.07	228.55	298.22
50.10	261.54	228.96	298.76
50.20	262.01	229.37	299.30
50.30	262.49	229.78	299.84
50.40	262.96	230.20	300.38
50.50	263.43	230.61	300.92
50.60	263.90	231.02	301.46
50.70	264.38	231.43	302.00
50.80	264.85	231.85	302.54
50.90	265.32	232.26	303.08
51.00	265.79	232.67	303.63
51.10	266.26	233.08	304.17
51.20	266.73	233.49	304.71
51.30	267.21	233.91	305.24
51.40	267.68	234.32	305.78
51.50	268.15	234.73	306.32
51.60	268.62	235.14	306.86
51.70	269.09	235.55	307.40
51.80	269.56	235.96	307.94
51.90	270.03	236.38	308.48
52.00	270.50	236.79	309.02
52.10	270.97	237.20	309.56
52.20	271.44	237.61	310.10
52.30	271.92	238.02	310.64
52.40	272.39	238.43	311.18
52.50	272.86	238.84	311.72
52.60	273.33	239.25	312.25
52.70	273.80	239.66	312.79
52.80	274.27	240.07	313.33
52.90	274.74	240.48	313.87
53.00	275.21	240.90	314.41
53.10	275.68	241.31	314.95
53.20	276.15	241.72	315.48
53.30	276.62	242.13	316.02
53.40	277.09	242.54	316.56
53.50	277.56	242.95	317.10
53.60	278.03	243.36	317.63
53.70	278.50	243.77	318.17
53.80	278.96	244.18	318.71
53.90	279.43	244.59	319.25
54.00	279.90	245.00	319.78
54.10	280.37	245.41	320.32
54.20	280.84	245.82	320.86
54.30	281.31	246.22	321.40
54.40	281.78	246.63	321.93
54.50	282.25	247.04	322.47
54.60	282.72	247.45	323.01
54.70	283.19	247.86	323.54
54.80	283.65	248.27	324.08
54.90	284.12	248.68	324.62
55.00	284.59	249.09	325.15
55.10	285.06	249.50	325.69
55.20	285.53	249.91	326.22
55.30	286.00	250.32	326.76
55.40	286.46	250.72	327.30
55.50	286.93	251.13	327.83
55.60	287.40	251.54	328.37
55.70	287.87	251.95	328.90
55.80	288.33	252.36	329.44
55.90	288.80	252.77	329.98
56.00	289.27	253.18	330.51
56.10	289.74	253.58	331.05
56.20	290.21	253.99	331.58
56.30	290.67	254.40	332.12
56.40	291.14	254.81	332.65
56.50	291.61	255.22	333.19
56.60	292.07	255.62	333.72
56.70	292.54	256.03	334.26
56.80	293.01	256.44	334.79
56.90	293.47	256.85	335.33
57.00	293.94	257.25	335.86
57.10	294.41	257.66	336.40
57.20	294.88	258.07	336.93
57.30	295.34	258.48	337.46
57.40	295.81	258.88	338.00
57.50	296.27	259.29	338.53
57.60	296.74	259.70	339.07
57.70	297.21	260.11	339.60
57.80	297.67	260.51	340.13
57.90	298.14	260.92	340.67
58.00	298.61	261.33	341.20
58.10	299.07	261.73	341.74
58.20	299.54	262.14	342.27
58.30	300.00	262.55	342.80
58.40	300.47	262.95	343.34
58.50	300.93	263.36	343.87
58.60	301.40	263.77	344.40
58.70	301.87	264.17	344.94
58.80	302.33	264.58	345.47
58.90	302.80	264.99	346.00
59.00	303.26	265.39	346.54
59.10	303.73	265.80	347.07
59.20	304.19	266.20	347.60
59.30	304.66	266.61	348.13
59.40	305.12	267.02	348.67
59.50	305.59	267.42	349.20
59.60	306.05	267.83	349.73
59.70	306.52	268.23	350.26
59.80	306.98	268.64	350.80
59.90	307.45	269.04	351.33
60.00	307.91	269.45	351.86
60.10	308.37	269.86	352.39
60.20	308.84	270.26	352.92
60.30	309.30	270.67	353.46
60.40	309.77	271.07	353.99
60.50	310.23	271.48	354.52
60.60	310.70	271.88	355.05
60.70	311.16	272.29	355.58
60.80	311.62	272.69	356.11
60.90	312.09	273.10	356.65
61.00	312.55	273.50	357.18
61.10	313.02	273.91	357.71
61.20	313.48	274.31	358.24
61.30	313.94	274.72	358.77
61.40	314.41	275.12	359.30
61.50	314.87	275.52	359.83
61.60	315.33	275.93	360.36
61.70	315.80	276.33	360.89
61.80	316.26	276.74	361.42
61.90	316.72	277.14	361.95
62.00	317.19	277.55	362.49
62.10	317.65	277.95	363.02
62.20	318.11	278.36	363.55
62.30	318.57	278.76	364.08
62.40	319.04	279.16	364.61
62.50	319.50	279.57	365.14
62.60	319.96	279.97	365.67
62.70	320.42	280.37	366.20
62.80	320.89	280.78	366.73
62.90	321.35	281.18	367.26
63.00	321.81	281.59	367.79
63.10	322.27	281.99	368.32
63.20	322.74	282.39	368.85
63.30	323.20	282.80	369.37
63.40	323.66	283.20	369.90
63.50	324.12	283.60	370.43
63.60	324.59	284.01	370.96
63.70	325.05	284.41	371.49
63.80	325.51	284.81	372.02
63.90	325.97	285.22	372.55
64.00	326.43	285.62	373.08
64.10	326.89	286.02	373.61
64.20	327.36	286.42	374.14
64.30	327.82	286.83	374.67
64.40	328.28	287.23	375.19
64.50	328.74	287.63	375.72
64.60	329.20	288.03	376.25
64.70	329.66	288.44	376.78
64.80	330.12	288.84	377.31
64.90	330.58	289.24	377.84
65.00	331.05	289.64	378.36
65.10	331.51	290.05	378.89
65.20	331.97	290.45	379.42
65.30	332.43	290.85	379.95
65.40	332.89	291.25	380.48
65.50	333.35	291.66	381.00
65.60	333.81	292.06	381.53
65.70	334.27	292.46	382.06
65.80	334.73	292.86	382.59
65.90	335.19	293.26	383.11
66.00	335.65	293.66	383.64
66.10	336.11	294.07	384.17
66.20	336.57	294.47	384.70
66.30	337.03	294.87	385.22
66.40	337.49	295.27	385.75
66.50	337.95	295.67	386.28
66.60	338.41	296.07	386.81
66.70	338.87	296.48	387.33
66.80	339.33	296.88	387.86
66.90	339.79	297.28	388.39
67.00	340.25	297.68	388.91
67.10	340.71	298.08	389.44
67.20	341.17	298.48	389.97
67.30	341.63	298.88	390.49
67.40	342.09	299.28	391.02
67.50	342.55	299.68	391.55
67.60	343.01	300.08	392.07
67.70	343.47	300.49	392.60
67.80	343.93	300.89	393.12
67.90	344.39	301.29	393.65
68.00	344.85	301.69	394.18
68.10	345.30	302.09	394.70
68.20	345.76	302.49	395.23
68.30	346.22	302.89	395.75
68.40	346.68	303.29	396.28
68.50	347.14	303.69	396.81
68.60	347.60	304.09	397.33
68.70	348.06	304.49	397.86
68.80	348.52	304.89	398.38
68.90	348.97	305.29	398.91
69.00	349.43	305.69	399.43
69.10	349.89	306.09	399.96
69.20	350.35	306.49	400.48
69.30	350.81	306.89	401.01
69.40	351.26	307.29	401.53
69.50	351.72	307.69	402.06
69.60	352.18	308.09	402.58
69.70	352.64	308.49	403.11
69.80	353.10	308.89	403.63
69.90	353.55	309.29	404.16
70.00	354.01	309.69	404.68
70.10	354.47	310.09	405.21
70.20	354.93	310.49	405.73
70.30	355.39	310.88	406.26
70.40	355.84	311.28	406.78
70.50	356.30	311.68	407.30
70.60	356.76	312.08	407.83
70.70	357.22	312.48	408.35
70.80	357.67	312.88	408.88
70.90	358.13	313.28	409.40
71.00	358.59	313.68	409.93
71.10	359.04	314.08	410.45
71.20	359.50	314.48	410.97
71.30	359.96	314.87	411.50
71.40	360.41	315.27	412.02
71.50	360.87	315.67	412.54
71.60	361.33	316.07	413.07
71.70	361.79	316.47	413.59
71.80	362.24	316.87	414.11
71.90	362.70	317.27	414.64
72.00	363.16	317.66	415.16
72.10	363.61	318.06	415.68
72.20	364.07	318.46	416.21
72.30	364.52	318.86	416.73
72.40	364.98	319.26	417.25
72.50	365.44	319.65	417.78
72.60	365.89	320.05	418.30
72.70	366.35	320.45	418.82
72.80	366.81	320.85	419.34
72.90	367.26	321.25	419.87
73.00	367.72	321.64	420.39
73.10	368.17	322.04	420.91
73.20	368.63	322.44	421.44
73.30	369.08	322.84	421.96
73.40	369.54	323.24	422.48
73.50	370.00	323.63	423.00
73.60	370.45	324.03	423.52
73.70	370.91	324.43	424.05
73.80	371.36	324.82	424.57
73.90	371.82	325.22	425.09
74.00	372.27	325.62	425.61
74.10	372.73	326.02	426.13
74.20	373.18	326.41	426.66
74.30	373.64	326.81	427.18
74.40	374.09	327.21	427.70
74.50	374.55	327.60	428.22
74.60	375.00	328.00	428.74
74.70	375.46	328.40	429.26
74.80	375.91	328.80	429.79
74.90	376.37	329.19	430.31
75.00	376.82	329.59	430.83
75.10	377.28	329.99	431.35
75.20	377.73	330.38	431.87
75.30	378.19	330.78	432.39
75.40	378.64	331.18	432.91
75.50	379.10	331.57	433.43
75.60	379.55	331.97	433.96
75.70	380.01	332.36	434.48
75.80	380.46	332.76	435.00
75.90	380.91	333.16	435.52
76.00	381.37	333.55	436.04
76.10	381.82	333.95	436.56
76.20	382.28	334.35	437.08
76.30	382.73	334.74	437.60
76.40	383.19	335.14	438.12
76.50	383.64	335.53	438.64
76.60	384.09	335.93	439.16
76.70	384.55	336.33	439.68
76.80	385.00	336.72	440.20
76.90	385.45	337.12	440.72
77.00	385.91	337.51	441.24
77.10	386.36	337.91	441.76
77.20	386.82	338.30	442.28
77.30	387.27	338.70	442.80
77.40	387.72	339.10	443.32
77.50	388.18	339.49	443.84
77.60	388.63	339.89	444.36
77.70	389.08	340.28	444.88
77.80	389.54	340.68	445.40
77.90	389.99	341.07	445.92
78.00	390.44	341.47	446.44
78.10	390.89	341.86	446.96
78.20	391.35	342.26	447.48
78.30	391.80	342.65	448.00
78.40	392.25	343.05	448.52
78.50	392.71	343.44	449.04
78.60	393.16	343.84	449.55
78.70	393.61	344.23	450.07
78.80	394.06	344.63	450.59
78.90	394.52	345.02	451.11
79.00	394.97	345.42	451.63
79.10	395.42	345.81	452.15
79.20	395.87	346.21	452.67
79.30	396.33	346.60	453.19
79.40	396.78	347.00	453.71
79.50	397.23	347.39	454.22
79.60	397.68	347.78	454.74
79.70	398.14	348.18	455.26
79.80	398.59	348.57	455.78
79.90	399.04	348.97	456.30
80.00	399.49	349.36	456.82
80.10	399.94	349.76	457.33
80.20	400.40	350.15	457.85
80.30	400.85	350.54	458.37
80.40	401.30	350.94	458.89
80.50	401.75	351.33	459.41
80.60	402.20	351.73	459.92
80.70	402.65	352.12	460.44
80.80	403.11	352.51	460.96
80.90	403.56	352.91	461.48
81.00	404.01	353.30	462.00
81.10	404.46	353.69	462.51
81.20	404.91	354.09	463.03
81.30	405.36	354.48	463.55
81.40	405.81	354.88	464.07
81.50	406.27	355.27	464.58
81.60	406.72	355.66	465.10
81.70	407.17	356.06	465.62
81.80	407.62	356.45	466.13
81.90	408.07	356.84	466.65
82.00	408.52	357.24	467.17
82.10	408.97	357.63	467.69
82.20	409.42	358.02	468.20
82.30	409.87	358.42	468.72
82.40	410.32	358.81	469.24
82.50	410.78	359.20	469.75
