# Supplementary material
Source: MDPI journal article supplement (https://www.mdpi.com/2504-446X/8/3/115)
Supplement: s1 [file s1 › Table S6 Crocodylus moreletii Framework.csv]

Head Length (cm)	Fit (estimation) (cm)	Lower limit (95% confidence interval) (cm)	Upper limit (95% confidence interval) (cm)
2.70	17.26	15.22	19.58
2.80	17.92	15.80	20.32
2.90	18.58	16.38	21.07
3.00	19.23	16.96	21.82
3.10	19.89	17.54	22.56
3.20	20.55	18.12	23.31
3.30	21.21	18.70	24.06
3.40	21.87	19.29	24.81
3.50	22.53	19.87	25.56
3.60	23.20	20.45	26.31
3.70	23.86	21.04	27.06
3.80	24.52	21.62	27.81
3.90	25.18	22.21	28.56
4.00	25.85	22.80	29.31
4.10	26.51	23.38	30.06
4.20	27.18	23.97	30.82
4.30	27.84	24.55	31.57
4.40	28.51	25.14	32.32
4.50	29.17	25.73	33.08
4.60	29.84	26.32	33.83
4.70	30.51	26.91	34.59
4.80	31.17	27.49	35.35
4.90	31.84	28.08	36.10
5.00	32.51	28.67	36.86
5.10	33.18	29.26	37.62
5.20	33.85	29.85	38.37
5.30	34.51	30.44	39.13
5.40	35.18	31.03	39.89
5.50	35.85	31.62	40.65
5.60	36.52	32.22	41.41
5.70	37.19	32.81	42.17
5.80	37.86	33.40	42.93
5.90	38.53	33.99	43.69
6.00	39.21	34.58	44.45
6.10	39.88	35.18	45.21
6.20	40.55	35.77	45.97
6.30	41.22	36.36	46.73
6.40	41.89	36.95	47.49
6.50	42.57	37.55	48.26
6.60	43.24	38.14	49.02
6.70	43.91	38.74	49.78
6.80	44.59	39.33	50.54
6.90	45.26	39.93	51.31
7.00	45.93	40.52	52.07
7.10	46.61	41.11	52.84
7.20	47.28	41.71	53.60
7.30	47.96	42.31	54.36
7.40	48.63	42.90	55.13
7.50	49.31	43.50	55.89
7.60	49.98	44.09	56.66
7.70	50.66	44.69	57.43
7.80	51.34	45.29	58.19
7.90	52.01	45.88	58.96
8.00	52.69	46.48	59.73
8.10	53.36	47.08	60.49
8.20	54.04	47.67	61.26
8.30	54.72	48.27	62.03
8.40	55.40	48.87	62.79
8.50	56.07	49.47	63.56
8.60	56.75	50.07	64.33
8.70	57.43	50.66	65.10
8.80	58.11	51.26	65.87
8.90	58.79	51.86	66.64
9.00	59.47	52.46	67.41
9.10	60.14	53.06	68.18
9.20	60.82	53.66	68.95
9.30	61.50	54.26	69.72
9.40	62.18	54.86	70.49
9.50	62.86	55.46	71.26
9.60	63.54	56.06	72.03
9.70	64.22	56.66	72.80
9.80	64.90	57.26	73.57
9.90	65.58	57.86	74.34
10.00	66.26	58.46	75.11
10.10	66.95	59.06	75.88
10.20	67.63	59.66	76.65
10.30	68.31	60.26	77.43
10.40	68.99	60.86	78.20
10.50	69.67	61.46	78.97
10.60	70.35	62.07	79.74
10.70	71.03	62.67	80.52
10.80	71.72	63.27	81.29
10.90	72.40	63.87	82.06
11.00	73.08	64.47	82.84
11.10	73.76	65.08	83.61
11.20	74.45	65.68	84.38
11.30	75.13	66.28	85.16
11.40	75.81	66.88	85.93
11.50	76.50	67.49	86.71
11.60	77.18	68.09	87.48
11.70	77.86	68.69	88.26
11.80	78.55	69.30	89.03
11.90	79.23	69.90	89.81
12.00	79.92	70.50	90.58
12.10	80.60	71.11	91.36
12.20	81.28	71.71	92.13
12.30	81.97	72.32	92.91
12.40	82.65	72.92	93.69
12.50	83.34	73.52	94.46
12.60	84.02	74.13	95.24
12.70	84.71	74.73	96.02
12.80	85.39	75.34	96.79
12.90	86.08	75.94	97.57
13.00	86.76	76.55	98.35
13.10	87.45	77.15	99.12
13.20	88.14	77.76	99.90
13.30	88.82	78.36	100.68
13.40	89.51	78.97	101.46
13.50	90.20	79.57	102.24
13.60	90.88	80.18	103.01
13.70	91.57	80.78	103.79
13.80	92.26	81.39	104.57
13.90	92.94	82.00	105.35
14.00	93.63	82.60	106.13
14.10	94.32	83.21	106.91
14.20	95.00	83.81	107.69
14.30	95.69	84.42	108.46
14.40	96.38	85.03	109.24
14.50	97.07	85.63	110.02
14.60	97.75	86.24	110.80
14.70	98.44	86.85	111.58
14.80	99.13	87.46	112.36
14.90	99.82	88.06	113.14
15.00	100.51	88.67	113.92
15.10	101.20	89.28	114.70
15.20	101.88	89.88	115.48
15.30	102.57	90.49	116.27
15.40	103.26	91.10	117.05
15.50	103.95	91.71	117.83
15.60	104.64	92.32	118.61
15.70	105.33	92.92	119.39
15.80	106.02	93.53	120.17
15.90	106.71	94.14	120.95
16.00	107.40	94.75	121.73
16.10	108.09	95.36	122.52
16.20	108.78	95.96	123.30
16.30	109.47	96.57	124.08
16.40	110.16	97.18	124.86
16.50	110.85	97.79	125.65
16.60	111.54	98.40	126.43
16.70	112.23	99.01	127.21
16.80	112.92	99.62	127.99
16.90	113.61	100.23	128.78
17.00	114.30	100.84	129.56
17.10	114.99	101.45	130.34
17.20	115.68	102.05	131.13
17.30	116.37	102.66	131.91
17.40	117.06	103.27	132.69
17.50	117.75	103.88	133.48
17.60	118.45	104.49	134.26
17.70	119.14	105.10	135.04
17.80	119.83	105.71	135.83
17.90	120.52	106.32	136.61
18.00	121.21	106.93	137.40
18.10	121.90	107.54	138.18
18.20	122.60	108.15	138.97
18.30	123.29	108.76	139.75
18.40	123.98	109.38	140.54
18.50	124.67	109.99	141.32
18.60	125.36	110.60	142.11
18.70	126.06	111.21	142.89
18.80	126.75	111.82	143.68
18.90	127.44	112.43	144.46
19.00	128.14	113.04	145.25
19.10	128.83	113.65	146.03
19.20	129.52	114.26	146.82
19.30	130.21	114.87	147.60
19.40	130.91	115.49	148.39
19.50	131.60	116.10	149.18
19.60	132.29	116.71	149.96
19.70	132.99	117.32	150.75
19.80	133.68	117.93	151.54
19.90	134.38	118.54	152.32
20.00	135.07	119.16	153.11
20.10	135.76	119.77	153.90
20.20	136.46	120.38	154.68
20.30	137.15	120.99	155.47
20.40	137.85	121.60	156.26
20.50	138.54	122.22	157.04
20.60	139.23	122.83	157.83
20.70	139.93	123.44	158.62
20.80	140.62	124.05	159.41
20.90	141.32	124.67	160.19
21.00	142.01	125.28	160.98
21.10	142.71	125.89	161.77
21.20	143.40	126.50	162.56
21.30	144.10	127.12	163.34
21.40	144.79	127.73	164.13
21.50	145.49	128.34	164.92
21.60	146.18	128.96	165.71
21.70	146.88	129.57	166.50
21.80	147.57	130.18	167.29
21.90	148.27	130.80	168.08
22.00	148.96	131.41	168.86
22.10	149.66	132.02	169.65
22.20	150.36	132.64	170.44
22.30	151.05	133.25	171.23
22.40	151.75	133.86	172.02
22.50	152.44	134.48	172.81
22.60	153.14	135.09	173.60
22.70	153.84	135.71	174.39
22.80	154.53	136.32	175.18
22.90	155.23	136.93	175.97
23.00	155.93	137.55	176.76
23.10	156.62	138.16	177.55
23.20	157.32	138.78	178.34
23.30	158.02	139.39	179.13
23.40	158.71	140.01	179.92
23.50	159.41	140.62	180.71
23.60	160.11	141.24	181.50
23.70	160.80	141.85	182.29
23.80	161.50	142.46	183.08
23.90	162.20	143.08	183.87
24.00	162.89	143.69	184.66
24.10	163.59	144.31	185.45
24.20	164.29	144.92	186.24
24.30	164.99	145.54	187.03
24.40	165.68	146.15	187.82
24.50	166.38	146.77	188.62
24.60	167.08	147.39	189.41
24.70	167.78	148.00	190.20
24.80	168.48	148.62	190.99
24.90	169.17	149.23	191.78
25.00	169.87	149.85	192.57
25.10	170.57	150.46	193.37
25.20	171.27	151.08	194.16
25.30	171.97	151.69	194.95
25.40	172.67	152.31	195.74
25.50	173.36	152.93	196.53
25.60	174.06	153.54	197.33
25.70	174.76	154.16	198.12
25.80	175.46	154.77	198.91
25.90	176.16	155.39	199.70
26.00	176.86	156.01	200.49
26.10	177.56	156.62	201.29
26.20	178.25	157.24	202.08
26.30	178.95	157.85	202.87
26.40	179.65	158.47	203.67
26.50	180.35	159.09	204.46
26.60	181.05	159.70	205.25
26.70	181.75	160.32	206.04
26.80	182.45	160.94	206.84
26.90	183.15	161.55	207.63
27.00	183.85	162.17	208.42
27.10	184.55	162.79	209.22
27.20	185.25	163.40	210.01
27.30	185.95	164.02	210.81
27.40	186.65	164.64	211.60
27.50	187.35	165.26	212.39
27.60	188.05	165.87	213.19
27.70	188.75	166.49	213.98
27.80	189.45	167.11	214.77
27.90	190.15	167.72	215.57
28.00	190.85	168.34	216.36
28.10	191.55	168.96	217.16
28.20	192.25	169.58	217.95
28.30	192.95	170.19	218.75
28.40	193.65	170.81	219.54
28.50	194.35	171.43	220.34
28.60	195.05	172.05	221.13
28.70	195.75	172.67	221.93
28.80	196.45	173.28	222.72
28.90	197.15	173.90	223.51
29.00	197.85	174.52	224.31
29.10	198.56	175.14	225.10
29.20	199.26	175.76	225.90
29.30	199.96	176.37	226.70
29.40	200.66	176.99	227.49
29.50	201.36	177.61	228.29
29.60	202.06	178.23	229.08
29.70	202.76	178.85	229.88
29.80	203.46	179.47	230.67
29.90	204.17	180.08	231.47
30.00	204.87	180.70	232.26
30.10	205.57	181.32	233.06
30.20	206.27	181.94	233.86
30.30	206.97	182.56	234.65
30.40	207.67	183.18	235.45
30.50	208.38	183.80	236.24
30.60	209.08	184.41	237.04
30.70	209.78	185.03	237.84
30.80	210.48	185.65	238.63
30.90	211.18	186.27	239.43
31.00	211.89	186.89	240.23
31.10	212.59	187.51	241.02
31.20	213.29	188.13	241.82
31.30	213.99	188.75	242.62
31.40	214.70	189.37	243.41
31.50	215.40	189.99	244.21
31.60	216.10	190.61	245.01
31.70	216.80	191.22	245.80
31.80	217.51	191.84	246.60
31.90	218.21	192.46	247.40
32.00	218.91	193.08	248.20
32.10	219.61	193.70	248.99
32.20	220.32	194.32	249.79
32.30	221.02	194.94	250.59
32.40	221.72	195.56	251.39
32.50	222.43	196.18	252.18
32.60	223.13	196.80	252.98
32.70	223.83	197.42	253.78
32.80	224.54	198.04	254.58
32.90	225.24	198.66	255.37
33.00	225.94	199.28	256.17
33.10	226.65	199.90	256.97
33.20	227.35	200.52	257.77
33.30	228.05	201.14	258.57
33.40	228.76	201.76	259.36
33.50	229.46	202.38	260.16
33.60	230.17	203.00	260.96
33.70	230.87	203.62	261.76
33.80	231.57	204.24	262.56
33.90	232.28	204.86	263.36
34.00	232.98	205.49	264.15
34.10	233.68	206.11	264.95
34.20	234.39	206.73	265.75
34.30	235.09	207.35	266.55
34.40	235.80	207.97	267.35
34.50	236.50	208.59	268.15
34.60	237.21	209.21	268.95
34.70	237.91	209.83	269.75
34.80	238.61	210.45	270.55
34.90	239.32	211.07	271.35
35.00	240.02	211.69	272.14
35.10	240.73	212.31	272.94
35.20	241.43	212.94	273.74
35.30	242.14	213.56	274.54
35.40	242.84	214.18	275.34
35.50	243.55	214.80	276.14
35.60	244.25	215.42	276.94
35.70	244.96	216.04	277.74
35.80	245.66	216.66	278.54
35.90	246.37	217.28	279.34
36.00	247.07	217.91	280.14
36.10	247.78	218.53	280.94
36.20	248.48	219.15	281.74
36.30	249.19	219.77	282.54
36.40	249.89	220.39	283.34
36.50	250.60	221.01	284.14
36.60	251.30	221.64	284.94
36.70	252.01	222.26	285.74
36.80	252.71	222.88	286.54
36.90	253.42	223.50	287.34
37.00	254.13	224.12	288.14
37.10	254.83	224.75	288.94
37.20	255.54	225.37	289.75
37.30	256.24	225.99	290.55
37.40	256.95	226.61	291.35
37.50	257.65	227.23	292.15
37.60	258.36	227.86	292.95
37.70	259.07	228.48	293.75
37.80	259.77	229.10	294.55
37.90	260.48	229.72	295.35
38.00	261.18	230.35	296.15
38.10	261.89	230.97	296.95
38.20	262.60	231.59	297.76
38.30	263.30	232.21	298.56
38.40	264.01	232.84	299.36
38.50	264.72	233.46	300.16
38.60	265.42	234.08	300.96
38.70	266.13	234.70	301.76
38.80	266.84	235.33	302.56
38.90	267.54	235.95	303.37
39.00	268.25	236.57	304.17
39.10	268.96	237.19	304.97
39.20	269.66	237.82	305.77
39.30	270.37	238.44	306.57
39.40	271.08	239.06	307.38
39.50	271.78	239.69	308.18
39.60	272.49	240.31	308.98
39.70	273.20	240.93	309.78
39.80	273.90	241.56	310.58
39.90	274.61	242.18	311.39
40.00	275.32	242.80	312.19
40.10	276.03	243.42	312.99
40.20	276.73	244.05	313.79
40.30	277.44	244.67	314.60
40.40	278.15	245.29	315.40
40.50	278.85	245.92	316.20
40.60	279.56	246.54	317.00
40.70	280.27	247.17	317.81
40.80	280.98	247.79	318.61
40.90	281.68	248.41	319.41
41.00	282.39	249.04	320.22
41.10	283.10	249.66	321.02
41.20	283.81	250.28	321.82
41.30	284.52	250.91	322.62
41.40	285.22	251.53	323.43
41.50	285.93	252.15	324.23
41.60	286.64	252.78	325.03
41.70	287.35	253.40	325.84
41.80	288.05	254.03	326.64
41.90	288.76	254.65	327.44
42.00	289.47	255.27	328.25
42.10	290.18	255.90	329.05
42.20	290.89	256.52	329.86
42.30	291.60	257.15	330.66
42.40	292.30	257.77	331.46
42.50	293.01	258.39	332.27
42.60	293.72	259.02	333.07
42.70	294.43	259.64	333.87
42.80	295.14	260.27	334.68
42.90	295.85	260.89	335.48
43.00	296.55	261.52	336.29
43.10	297.26	262.14	337.09
43.20	297.97	262.77	337.89
43.30	298.68	263.39	338.70
43.40	299.39	264.01	339.50
43.50	300.10	264.64	340.31
43.60	300.81	265.26	341.11
43.70	301.51	265.89	341.92
43.80	302.22	266.51	342.72
43.90	302.93	267.14	343.52
44.00	303.64	267.76	344.33
44.10	304.35	268.39	345.13
44.20	305.06	269.01	345.94
44.30	305.77	269.64	346.74
44.40	306.48	270.26	347.55
44.50	307.19	270.89	348.35
44.60	307.90	271.51	349.16
44.70	308.61	272.14	349.96
44.80	309.32	272.76	350.77
44.90	310.02	273.39	351.57
45.00	310.73	274.01	352.38
45.10	311.44	274.64	353.18
45.20	312.15	275.26	353.99
45.30	312.86	275.89	354.79
45.40	313.57	276.51	355.60
45.50	314.28	277.14	356.40
45.60	314.99	277.76	357.21
45.70	315.70	278.39	358.01
45.80	316.41	279.01	358.82
45.90	317.12	279.64	359.63
46.00	317.83	280.27	360.43
46.10	318.54	280.89	361.24
46.20	319.25	281.52	362.04
46.30	319.96	282.14	362.85
46.40	320.67	282.77	363.65
46.50	321.38	283.39	364.46
46.60	322.09	284.02	365.27
46.70	322.80	284.64	366.07
46.80	323.51	285.27	366.88
46.90	324.22	285.90	367.68
47.00	324.93	286.52	368.49
47.10	325.64	287.15	369.30
47.20	326.35	287.77	370.10
47.30	327.06	288.40	370.91
47.40	327.77	289.03	371.71
47.50	328.48	289.65	372.52
47.60	329.19	290.28	373.33
47.70	329.90	290.90	374.13
47.80	330.61	291.53	374.94
47.90	331.33	292.16	375.75
48.00	332.04	292.78	376.55
48.10	332.75	293.41	377.36
48.20	333.46	294.03	378.17
48.30	334.17	294.66	378.97
48.40	334.88	295.29	379.78
48.50	335.59	295.91	380.59
48.60	336.30	296.54	381.39
48.70	337.01	297.17	382.20
48.80	337.72	297.79	383.01
48.90	338.43	298.42	383.81
49.00	339.15	299.05	384.62
49.10	339.86	299.67	385.43
49.20	340.57	300.30	386.24
49.30	341.28	300.93	387.04
49.40	341.99	301.55	387.85
49.50	342.70	302.18	388.66
49.60	343.41	302.81	389.46
49.70	344.12	303.43	390.27
49.80	344.84	304.06	391.08
49.90	345.55	304.69	391.89
50.00	346.26	305.31	392.69
50.10	346.97	305.94	393.50
50.20	347.68	306.57	394.31
50.30	348.39	307.19	395.12
50.40	349.10	307.82	395.92
50.50	349.82	308.45	396.73
50.60	350.53	309.07	397.54
50.70	351.24	309.70	398.35
50.80	351.95	310.33	399.16
50.90	352.66	310.96	399.96
51.00	353.37	311.58	400.77
51.10	354.09	312.21	401.58
51.20	354.80	312.84	402.39
51.30	355.51	313.46	403.20
51.40	356.22	314.09	404.00
51.50	356.93	314.72	404.81
51.60	357.65	315.35	405.62
51.70	358.36	315.97	406.43
51.80	359.07	316.60	407.24
51.90	359.78	317.23	408.05
52.00	360.50	317.86	408.85
52.10	361.21	318.48	409.66
52.20	361.92	319.11	410.47
52.30	362.63	319.74	411.28
52.40	363.34	320.37	412.09
52.50	364.06	320.99	412.90
52.60	364.77	321.62	413.71
52.70	365.48	322.25	414.51
52.80	366.19	322.88	415.32
52.90	366.91	323.51	416.13
53.00	367.62	324.13	416.94
53.10	368.33	324.76	417.75
53.20	369.05	325.39	418.56
53.30	369.76	326.02	419.37
53.40	370.47	326.64	420.18
53.50	371.18	327.27	420.99
53.60	371.90	327.90	421.80
53.70	372.61	328.53	422.60
53.80	373.32	329.16	423.41
53.90	374.04	329.78	424.22
54.00	374.75	330.41	425.03
54.10	375.46	331.04	425.84
54.20	376.17	331.67	426.65
54.30	376.89	332.30	427.46
54.40	377.60	332.93	428.27
54.50	378.31	333.55	429.08
54.60	379.03	334.18	429.89
54.70	379.74	334.81	430.70
54.80	380.45	335.44	431.51
54.90	381.17	336.07	432.32
55.00	381.88	336.70	433.13
55.10	382.59	337.32	433.94
55.20	383.31	337.95	434.75
55.30	384.02	338.58	435.56
55.40	384.73	339.21	436.37
55.50	385.45	339.84	437.18
55.60	386.16	340.47	437.99
55.70	386.87	341.10	438.80
55.80	387.59	341.72	439.61
55.90	388.30	342.35	440.42
56.00	389.02	342.98	441.23
56.10	389.73	343.61	442.04
56.20	390.44	344.24	442.85
56.30	391.16	344.87	443.66
56.40	391.87	345.50	444.47
56.50	392.58	346.13	445.28
56.60	393.30	346.75	446.09
56.70	394.01	347.38	446.90
56.80	394.73	348.01	447.71
56.90	395.44	348.64	448.52
57.00	396.15	349.27	449.33
57.10	396.87	349.90	450.14
57.20	397.58	350.53	450.95
57.30	398.30	351.16	451.76
57.40	399.01	351.79	452.57
57.50	399.72	352.42	453.38
57.60	400.44	353.04	454.20
57.70	401.15	353.67	455.01
57.80	401.87	354.30	455.82
57.90	402.58	354.93	456.63
58.00	403.30	355.56	457.44
58.10	404.01	356.19	458.25
58.20	404.73	356.82	459.06
58.30	405.44	357.45	459.87
58.40	406.15	358.08	460.68
58.50	406.87	358.71	461.49
58.60	407.58	359.34	462.31
58.70	408.30	359.97	463.12
58.80	409.01	360.60	463.93
58.90	409.73	361.23	464.74
59.00	410.44	361.86	465.55
59.10	411.16	362.49	466.36
59.20	411.87	363.11	467.17
59.30	412.59	363.74	467.99
59.40	413.30	364.37	468.80
59.50	414.02	365.00	469.61
59.60	414.73	365.63	470.42
59.70	415.45	366.26	471.23
59.80	416.16	366.89	472.04
59.90	416.88	367.52	472.86
60.00	417.59	368.15	473.67
60.10	418.31	368.78	474.48
60.20	419.02	369.41	475.29
60.30	419.74	370.04	476.10
60.40	420.45	370.67	476.91
60.50	421.17	371.30	477.73
60.60	421.88	371.93	478.54
60.70	422.60	372.56	479.35
60.80	423.31	373.19	480.16
60.90	424.03	373.82	480.98
61.00	424.74	374.45	481.79
61.10	425.46	375.08	482.60
61.20	426.17	375.71	483.41
61.30	426.89	376.34	484.22
61.40	427.60	376.97	485.04
61.50	428.32	377.60	485.85
61.60	429.04	378.23	486.66
61.70	429.75	378.86	487.47
61.80	430.47	379.49	488.29
61.90	431.18	380.12	489.10
62.00	431.90	380.75	489.91
62.10	432.61	381.39	490.72
62.20	433.33	382.02	491.54
62.30	434.05	382.65	492.35
62.40	434.76	383.28	493.16
62.50	435.48	383.91	493.97
62.60	436.19	384.54	494.79
62.70	436.91	385.17	495.60
62.80	437.62	385.80	496.41
62.90	438.34	386.43	497.23
63.00	439.06	387.06	498.04
63.10	439.77	387.69	498.85
63.20	440.49	388.32	499.66
63.30	441.20	388.95	500.48
63.40	441.92	389.58	501.29
63.50	442.64	390.21	502.10
63.60	443.35	390.84	502.92
63.70	444.07	391.48	503.73
63.80	444.79	392.11	504.54
63.90	445.50	392.74	505.36
64.00	446.22	393.37	506.17
64.10	446.93	394.00	506.98
64.20	447.65	394.63	507.80
64.30	448.37	395.26	508.61
64.40	449.08	395.89	509.42
64.50	449.80	396.52	510.24
64.60	450.52	397.15	511.05
64.70	451.23	397.78	511.86
64.80	451.95	398.42	512.68
64.90	452.67	399.05	513.49
65.00	453.38	399.68	514.30
65.10	454.10	400.31	515.12
65.20	454.82	400.94	515.93
65.30	455.53	401.57	516.75
65.40	456.25	402.20	517.56
65.50	456.97	402.83	518.37
65.60	457.68	403.47	519.19
65.70	458.40	404.10	520.00
65.80	459.12	404.73	520.82
65.90	459.83	405.36	521.63
66.00	460.55	405.99	522.44
66.10	461.27	406.62	523.26
66.20	461.98	407.25	524.07
66.30	462.70	407.88	524.89
66.40	463.42	408.52	525.70
66.50	464.14	409.15	526.51
66.60	464.85	409.78	527.33
66.70	465.57	410.41	528.14
66.80	466.29	411.04	528.96
66.90	467.00	411.67	529.77
67.00	467.72	412.31	530.59
67.10	468.44	412.94	531.40
67.20	469.16	413.57	532.21
67.30	469.87	414.20	533.03
67.40	470.59	414.83	533.84
67.50	471.31	415.46	534.66
67.60	472.03	416.10	535.47
67.70	472.74	416.73	536.29
67.80	473.46	417.36	537.10
67.90	474.18	417.99	537.92
68.00	474.90	418.62	538.73
68.10	475.61	419.26	539.55
68.20	476.33	419.89	540.36
68.30	477.05	420.52	541.18
68.40	477.77	421.15	541.99
68.50	478.48	421.78	542.81
68.60	479.20	422.42	543.62
68.70	479.92	423.05	544.44
68.80	480.64	423.68	545.25
68.90	481.35	424.31	546.07
69.00	482.07	424.94	546.88
69.10	482.79	425.58	547.70
69.20	483.51	426.21	548.51
69.30	484.23	426.84	549.33
69.40	484.94	427.47	550.14
69.50	485.66	428.10	550.96
69.60	486.38	428.74	551.77
69.70	487.10	429.37	552.59
69.80	487.82	430.00	553.40
69.90	488.53	430.63	554.22
70.00	489.25	431.27	555.03
70.10	489.97	431.90	555.85
70.20	490.69	432.53	556.66
70.30	491.41	433.16	557.48
70.40	492.12	433.80	558.29
70.50	492.84	434.43	559.11
70.60	493.56	435.06	559.93
70.70	494.28	435.69	560.74
70.80	495.00	436.33	561.56
70.90	495.71	436.96	562.37
71.00	496.43	437.59	563.19
71.10	497.15	438.22	564.00
71.20	497.87	438.86	564.82
71.30	498.59	439.49	565.64
71.40	499.31	440.12	566.45
71.50	500.03	440.75	567.27
71.60	500.74	441.39	568.08
71.70	501.46	442.02	568.90
71.80	502.18	442.65	569.72
71.90	502.90	443.28	570.53
72.00	503.62	443.92	571.35
72.10	504.34	444.55	572.16
72.20	505.06	445.18	572.98
72.30	505.77	445.82	573.80
72.40	506.49	446.45	574.61
72.50	507.21	447.08	575.43
72.60	507.93	447.71	576.25
72.70	508.65	448.35	577.06
72.80	509.37	448.98	577.88
72.90	510.09	449.61	578.69
73.00	510.81	450.25	579.51
73.10	511.52	450.88	580.33
73.20	512.24	451.51	581.14
73.30	512.96	452.15	581.96
73.40	513.68	452.78	582.78
73.50	514.40	453.41	583.59
73.60	515.12	454.05	584.41
73.70	515.84	454.68	585.23
73.80	516.56	455.31	586.04
73.90	517.28	455.95	586.86
74.00	518.00	456.58	587.68
74.10	518.72	457.21	588.49
74.20	519.43	457.84	589.31
74.30	520.15	458.48	590.13
74.40	520.87	459.11	590.94
74.50	521.59	459.74	591.76
74.60	522.31	460.38	592.58
74.70	523.03	461.01	593.39
74.80	523.75	461.65	594.21
74.90	524.47	462.28	595.03
75.00	525.19	462.91	595.85
75.10	525.91	463.55	596.66
75.20	526.63	464.18	597.48
75.30	527.35	464.81	598.30
75.40	528.07	465.45	599.11
75.50	528.79	466.08	599.93
75.60	529.51	466.71	600.75
75.70	530.23	467.35	601.57
75.80	530.95	467.98	602.38
75.90	531.67	468.61	603.20
76.00	532.39	469.25	604.02
76.10	533.10	469.88	604.83
76.20	533.82	470.52	605.65
76.30	534.54	471.15	606.47
76.40	535.26	471.78	607.29
76.50	535.98	472.42	608.10
76.60	536.70	473.05	608.92
76.70	537.42	473.68	609.74
76.80	538.14	474.32	610.56
76.90	538.86	474.95	611.37
77.00	539.58	475.59	612.19
77.10	540.30	476.22	613.01
77.20	541.02	476.85	613.83
77.30	541.74	477.49	614.65
77.40	542.46	478.12	615.46
77.50	543.18	478.76	616.28
77.60	543.90	479.39	617.10
77.70	544.62	480.02	617.92
77.80	545.34	480.66	618.74
77.90	546.06	481.29	619.55
78.00	546.78	481.93	620.37
78.10	547.50	482.56	621.19
78.20	548.22	483.19	622.01
78.30	548.95	483.83	622.83
78.40	549.67	484.46	623.64
78.50	550.39	485.10	624.46
78.60	551.11	485.73	625.28
78.70	551.83	486.37	626.10
78.80	552.55	487.00	626.92
78.90	553.27	487.63	627.73
79.00	553.99	488.27	628.55
79.10	554.71	488.90	629.37
79.20	555.43	489.54	630.19
79.30	556.15	490.17	631.01
79.40	556.87	490.81	631.83
79.50	557.59	491.44	632.64
79.60	558.31	492.08	633.46
79.70	559.03	492.71	634.28
79.80	559.75	493.34	635.10
79.90	560.47	493.98	635.92
80.00	561.19	494.61	636.74
80.10	561.91	495.25	637.56
80.20	562.64	495.88	638.37
80.30	563.36	496.52	639.19
80.40	564.08	497.15	640.01
80.50	564.80	497.79	640.83
80.60	565.52	498.42	641.65
80.70	566.24	499.06	642.47
80.80	566.96	499.69	643.29
80.90	567.68	500.32	644.11
81.00	568.40	500.96	644.92
81.10	569.12	501.59	645.74
81.20	569.84	502.23	646.56
81.30	570.56	502.86	647.38
81.40	571.29	503.50	648.20
81.50	572.01	504.13	649.02
81.60	572.73	504.77	649.84
81.70	573.45	505.40	650.66
81.80	574.17	506.04	651.48
81.90	574.89	506.67	652.30
82.00	575.61	507.31	653.11
82.10	576.33	507.94	653.93
82.20	577.06	508.58	654.75
82.30	577.78	509.21	655.57
82.40	578.50	509.85	656.39
82.50	579.22	510.48	657.21
