# Supplementary material
Source: MDPI journal article supplement (https://www.mdpi.com/2504-446X/8/3/115)
Supplement: s1 [file s1 › Table S7 Crocodylus niloticus Framework.csv]

Head Length (cm)	Fit (estimation) (cm)	Lower limit (95% confidence interval) (cm)	Upper limit (95% confidence interval) (cm)
2.70	19.90	17.36	22.82
2.80	20.63	18.00	23.65
2.90	21.36	18.63	24.49
3.00	22.09	19.27	25.32
3.10	22.81	19.90	26.15
3.20	23.54	20.54	26.99
3.30	24.27	21.17	27.82
3.40	25.00	21.81	28.65
3.50	25.72	22.44	29.48
3.60	26.45	23.07	30.31
3.70	27.17	23.71	31.15
3.80	27.90	24.34	31.98
3.90	28.62	24.97	32.81
4.00	29.35	25.61	33.64
4.10	30.07	26.24	34.47
4.20	30.80	26.87	35.30
4.30	31.52	27.50	36.13
4.40	32.25	28.14	36.96
4.50	32.97	28.77	37.79
4.60	33.70	29.40	38.62
4.70	34.42	30.03	39.45
4.80	35.14	30.66	40.28
4.90	35.87	31.29	41.10
5.00	36.59	31.93	41.93
5.10	37.31	32.56	42.76
5.20	38.03	33.19	43.59
5.30	38.76	33.82	44.42
5.40	39.48	34.45	45.25
5.50	40.20	35.08	46.07
5.60	40.92	35.71	46.90
5.70	41.65	36.34	47.73
5.80	42.37	36.97	48.55
5.90	43.09	37.60	49.38
6.00	43.81	38.23	50.21
6.10	44.53	38.86	51.03
6.20	45.25	39.49	51.86
6.30	45.98	40.12	52.69
6.40	46.70	40.75	53.51
6.50	47.42	41.38	54.34
6.60	48.14	42.01	55.16
6.70	48.86	42.64	55.99
6.80	49.58	43.26	56.82
6.90	50.30	43.89	57.64
7.00	51.02	44.52	58.47
7.10	51.74	45.15	59.29
7.20	52.46	45.78	60.12
7.30	53.18	46.41	60.94
7.40	53.90	47.04	61.77
7.50	54.62	47.66	62.59
7.60	55.34	48.29	63.41
7.70	56.06	48.92	64.24
7.80	56.78	49.55	65.06
7.90	57.50	50.17	65.89
8.00	58.22	50.80	66.71
8.10	58.93	51.43	67.53
8.20	59.65	52.06	68.36
8.30	60.37	52.68	69.18
8.40	61.09	53.31	70.00
8.50	61.81	53.94	70.83
8.60	62.53	54.57	71.65
8.70	63.25	55.19	72.47
8.80	63.96	55.82	73.30
8.90	64.68	56.45	74.12
9.00	65.40	57.07	74.94
9.10	66.12	57.70	75.77
9.20	66.84	58.33	76.59
9.30	67.55	58.95	77.41
9.40	68.27	59.58	78.23
9.50	68.99	60.21	79.05
9.60	69.71	60.83	79.88
9.70	70.42	61.46	80.70
9.80	71.14	62.08	81.52
9.90	71.86	62.71	82.34
10.00	72.58	63.34	83.16
10.10	73.29	63.96	83.99
10.20	74.01	64.59	84.81
10.30	74.73	65.21	85.63
10.40	75.44	65.84	86.45
10.50	76.16	66.46	87.27
10.60	76.88	67.09	88.09
10.70	77.59	67.72	88.91
10.80	78.31	68.34	89.74
10.90	79.03	68.97	90.56
11.00	79.74	69.59	91.38
11.10	80.46	70.22	92.20
11.20	81.18	70.84	93.02
11.30	81.89	71.47	93.84
11.40	82.61	72.09	94.66
11.50	83.32	72.72	95.48
11.60	84.04	73.34	96.30
11.70	84.76	73.97	97.12
11.80	85.47	74.59	97.94
11.90	86.19	75.21	98.76
12.00	86.90	75.84	99.58
12.10	87.62	76.46	100.40
12.20	88.33	77.09	101.22
12.30	89.05	77.71	102.04
12.40	89.76	78.34	102.86
12.50	90.48	78.96	103.68
12.60	91.19	79.58	104.50
12.70	91.91	80.21	105.32
12.80	92.62	80.83	106.14
12.90	93.34	81.46	106.96
13.00	94.05	82.08	107.78
13.10	94.77	82.70	108.60
13.20	95.48	83.33	109.41
13.30	96.20	83.95	110.23
13.40	96.91	84.58	111.05
13.50	97.63	85.20	111.87
13.60	98.34	85.82	112.69
13.70	99.06	86.45	113.51
13.80	99.77	87.07	114.33
13.90	100.49	87.69	115.15
14.00	101.20	88.32	115.96
14.10	101.91	88.94	116.78
14.20	102.63	89.56	117.60
14.30	103.34	90.19	118.42
14.40	104.06	90.81	119.24
14.50	104.77	91.43	120.06
14.60	105.48	92.05	120.87
14.70	106.20	92.68	121.69
14.80	106.91	93.30	122.51
14.90	107.63	93.92	123.33
15.00	108.34	94.55	124.15
15.10	109.05	95.17	124.96
15.20	109.77	95.79	125.78
15.30	110.48	96.41	126.60
15.40	111.19	97.04	127.42
15.50	111.91	97.66	128.23
15.60	112.62	98.28	129.05
15.70	113.33	98.90	129.87
15.80	114.05	99.53	130.69
15.90	114.76	100.15	131.50
16.00	115.47	100.77	132.32
16.10	116.19	101.39	133.14
16.20	116.90	102.01	133.96
16.30	117.61	102.64	134.77
16.40	118.33	103.26	135.59
16.50	119.04	103.88	136.41
16.60	119.75	104.50	137.22
16.70	120.46	105.12	138.04
16.80	121.18	105.75	138.86
16.90	121.89	106.37	139.67
17.00	122.60	106.99	140.49
17.10	123.31	107.61	141.31
17.20	124.03	108.23	142.12
17.30	124.74	108.86	142.94
17.40	125.45	109.48	143.76
17.50	126.16	110.10	144.57
17.60	126.88	110.72	145.39
17.70	127.59	111.34	146.21
17.80	128.30	111.96	147.02
17.90	129.01	112.58	147.84
18.00	129.73	113.21	148.66
18.10	130.44	113.83	149.47
18.20	131.15	114.45	150.29
18.30	131.86	115.07	151.10
18.40	132.57	115.69	151.92
18.50	133.29	116.31	152.74
18.60	134.00	116.93	153.55
18.70	134.71	117.55	154.37
18.80	135.42	118.17	155.18
18.90	136.13	118.80	156.00
19.00	136.84	119.42	156.81
19.10	137.56	120.04	157.63
19.20	138.27	120.66	158.45
19.30	138.98	121.28	159.26
19.40	139.69	121.90	160.08
19.50	140.40	122.52	160.89
19.60	141.11	123.14	161.71
19.70	141.82	123.76	162.52
19.80	142.54	124.38	163.34
19.90	143.25	125.00	164.15
20.00	143.96	125.62	164.97
20.10	144.67	126.24	165.78
20.20	145.38	126.86	166.60
20.30	146.09	127.49	167.41
20.40	146.80	128.11	168.23
20.50	147.51	128.73	169.04
20.60	148.23	129.35	169.86
20.70	148.94	129.97	170.67
20.80	149.65	130.59	171.49
20.90	150.36	131.21	172.30
21.00	151.07	131.83	173.12
21.10	151.78	132.45	173.93
21.20	152.49	133.07	174.75
21.30	153.20	133.69	175.56
21.40	153.91	134.31	176.38
21.50	154.62	134.93	177.19
21.60	155.33	135.55	178.01
21.70	156.04	136.17	178.82
21.80	156.75	136.79	179.64
21.90	157.46	137.41	180.45
22.00	158.17	138.03	181.26
22.10	158.88	138.65	182.08
22.20	159.60	139.27	182.89
22.30	160.31	139.89	183.71
22.40	161.02	140.50	184.52
22.50	161.73	141.12	185.34
22.60	162.44	141.74	186.15
22.70	163.15	142.36	186.96
22.80	163.86	142.98	187.78
22.90	164.57	143.60	188.59
23.00	165.28	144.22	189.41
23.10	165.99	144.84	190.22
23.20	166.70	145.46	191.03
23.30	167.41	146.08	191.85
23.40	168.12	146.70	192.66
23.50	168.83	147.32	193.47
23.60	169.54	147.94	194.29
23.70	170.25	148.56	195.10
23.80	170.96	149.18	195.92
23.90	171.67	149.80	196.73
24.00	172.38	150.41	197.54
24.10	173.08	151.03	198.36
24.20	173.79	151.65	199.17
24.30	174.50	152.27	199.98
24.40	175.21	152.89	200.80
24.50	175.92	153.51	201.61
24.60	176.63	154.13	202.42
24.70	177.34	154.75	203.24
24.80	178.05	155.37	204.05
24.90	178.76	155.98	204.86
25.00	179.47	156.60	205.68
25.10	180.18	157.22	206.49
25.20	180.89	157.84	207.30
25.30	181.60	158.46	208.12
25.40	182.31	159.08	208.93
25.50	183.02	159.70	209.74
25.60	183.73	160.32	210.55
25.70	184.43	160.93	211.37
25.80	185.14	161.55	212.18
25.90	185.85	162.17	212.99
26.00	186.56	162.79	213.81
26.10	187.27	163.41	214.62
26.20	187.98	164.03	215.43
26.30	188.69	164.64	216.24
26.40	189.40	165.26	217.06
26.50	190.11	165.88	217.87
26.60	190.82	166.50	218.68
26.70	191.52	167.12	219.49
26.80	192.23	167.74	220.31
26.90	192.94	168.35	221.12
27.00	193.65	168.97	221.93
27.10	194.36	169.59	222.74
27.20	195.07	170.21	223.56
27.30	195.78	170.83	224.37
27.40	196.48	171.45	225.18
27.50	197.19	172.06	225.99
27.60	197.90	172.68	226.81
27.70	198.61	173.30	227.62
27.80	199.32	173.92	228.43
27.90	200.03	174.53	229.24
28.00	200.74	175.15	230.05
28.10	201.44	175.77	230.87
28.20	202.15	176.39	231.68
28.30	202.86	177.01	232.49
28.40	203.57	177.62	233.30
28.50	204.28	178.24	234.11
28.60	204.99	178.86	234.93
28.70	205.69	179.48	235.74
28.80	206.40	180.09	236.55
28.90	207.11	180.71	237.36
29.00	207.82	181.33	238.17
29.10	208.53	181.95	238.99
29.20	209.23	182.57	239.80
29.30	209.94	183.18	240.61
29.40	210.65	183.80	241.42
29.50	211.36	184.42	242.23
29.60	212.07	185.04	243.04
29.70	212.77	185.65	243.86
29.80	213.48	186.27	244.67
29.90	214.19	186.89	245.48
30.00	214.90	187.50	246.29
30.10	215.60	188.12	247.10
30.20	216.31	188.74	247.91
30.30	217.02	189.36	248.72
30.40	217.73	189.97	249.54
30.50	218.44	190.59	250.35
30.60	219.14	191.21	251.16
30.70	219.85	191.83	251.97
30.80	220.56	192.44	252.78
30.90	221.27	193.06	253.59
31.00	221.97	193.68	254.40
31.10	222.68	194.29	255.22
31.20	223.39	194.91	256.03
31.30	224.10	195.53	256.84
31.40	224.80	196.14	257.65
31.50	225.51	196.76	258.46
31.60	226.22	197.38	259.27
31.70	226.93	198.00	260.08
31.80	227.63	198.61	260.89
31.90	228.34	199.23	261.70
32.00	229.05	199.85	262.51
32.10	229.75	200.46	263.33
32.20	230.46	201.08	264.14
32.30	231.17	201.70	264.95
32.40	231.88	202.31	265.76
32.50	232.58	202.93	266.57
32.60	233.29	203.55	267.38
32.70	234.00	204.16	268.19
32.80	234.70	204.78	269.00
32.90	235.41	205.40	269.81
33.00	236.12	206.01	270.62
33.10	236.83	206.63	271.43
33.20	237.53	207.25	272.24
33.30	238.24	207.86	273.05
33.40	238.95	208.48	273.86
33.50	239.65	209.10	274.68
33.60	240.36	209.71	275.49
33.70	241.07	210.33	276.30
33.80	241.77	210.95	277.11
33.90	242.48	211.56	277.92
34.00	243.19	212.18	278.73
34.10	243.89	212.79	279.54
34.20	244.60	213.41	280.35
34.30	245.31	214.03	281.16
34.40	246.01	214.64	281.97
34.50	246.72	215.26	282.78
34.60	247.43	215.88	283.59
34.70	248.13	216.49	284.40
34.80	248.84	217.11	285.21
34.90	249.55	217.72	286.02
35.00	250.25	218.34	286.83
35.10	250.96	218.96	287.64
35.20	251.67	219.57	288.45
35.30	252.37	220.19	289.26
35.40	253.08	220.80	290.07
35.50	253.79	221.42	290.88
35.60	254.49	222.04	291.69
35.70	255.20	222.65	292.50
35.80	255.90	223.27	293.31
35.90	256.61	223.88	294.12
36.00	257.32	224.50	294.93
36.10	258.02	225.12	295.74
36.20	258.73	225.73	296.55
36.30	259.44	226.35	297.36
36.40	260.14	226.96	298.17
36.50	260.85	227.58	298.98
36.60	261.55	228.20	299.79
36.70	262.26	228.81	300.60
36.80	262.97	229.43	301.41
36.90	263.67	230.04	302.22
37.00	264.38	230.66	303.03
37.10	265.08	231.27	303.84
37.20	265.79	231.89	304.65
37.30	266.50	232.51	305.46
37.40	267.20	233.12	306.27
37.50	267.91	233.74	307.07
37.60	268.61	234.35	307.88
37.70	269.32	234.97	308.69
37.80	270.03	235.58	309.50
37.90	270.73	236.20	310.31
38.00	271.44	236.81	311.12
38.10	272.14	237.43	311.93
38.20	272.85	238.04	312.74
38.30	273.55	238.66	313.55
38.40	274.26	239.28	314.36
38.50	274.97	239.89	315.17
38.60	275.67	240.51	315.98
38.70	276.38	241.12	316.79
38.80	277.08	241.74	317.60
38.90	277.79	242.35	318.41
39.00	278.49	242.97	319.21
39.10	279.20	243.58	320.02
39.20	279.90	244.20	320.83
39.30	280.61	244.81	321.64
39.40	281.32	245.43	322.45
39.50	282.02	246.04	323.26
39.60	282.73	246.66	324.07
39.70	283.43	247.27	324.88
39.80	284.14	247.89	325.69
39.90	284.84	248.50	326.50
40.00	285.55	249.12	327.30
40.10	286.25	249.73	328.11
40.20	286.96	250.35	328.92
40.30	287.66	250.96	329.73
40.40	288.37	251.58	330.54
40.50	289.08	252.19	331.35
40.60	289.78	252.81	332.16
40.70	290.49	253.42	332.97
40.80	291.19	254.04	333.78
40.90	291.90	254.65	334.58
41.00	292.60	255.27	335.39
41.10	293.31	255.88	336.20
41.20	294.01	256.50	337.01
41.30	294.72	257.11	337.82
41.40	295.42	257.73	338.63
41.50	296.13	258.34	339.44
41.60	296.83	258.96	340.24
41.70	297.54	259.57	341.05
41.80	298.24	260.19	341.86
41.90	298.95	260.80	342.67
42.00	299.65	261.42	343.48
42.10	300.36	262.03	344.29
42.20	301.06	262.65	345.10
42.30	301.77	263.26	345.90
42.40	302.47	263.88	346.71
42.50	303.18	264.49	347.52
42.60	303.88	265.10	348.33
42.70	304.59	265.72	349.14
42.80	305.29	266.33	349.95
42.90	306.00	266.95	350.75
43.00	306.70	267.56	351.56
43.10	307.40	268.18	352.37
43.20	308.11	268.79	353.18
43.30	308.81	269.41	353.99
43.40	309.52	270.02	354.80
43.50	310.22	270.64	355.60
43.60	310.93	271.25	356.41
43.70	311.63	271.86	357.22
43.80	312.34	272.48	358.03
43.90	313.04	273.09	358.84
44.00	313.75	273.71	359.64
44.10	314.45	274.32	360.45
44.20	315.16	274.94	361.26
44.30	315.86	275.55	362.07
44.40	316.56	276.16	362.88
44.50	317.27	276.78	363.68
44.60	317.97	277.39	364.49
44.70	318.68	278.01	365.30
44.80	319.38	278.62	366.11
44.90	320.09	279.23	366.92
45.00	320.79	279.85	367.72
45.10	321.50	280.46	368.53
45.20	322.20	281.08	369.34
45.30	322.90	281.69	370.15
45.40	323.61	282.31	370.96
45.50	324.31	282.92	371.76
45.60	325.02	283.53	372.57
45.70	325.72	284.15	373.38
45.80	326.43	284.76	374.19
45.90	327.13	285.38	374.99
46.00	327.83	285.99	375.80
46.10	328.54	286.60	376.61
46.20	329.24	287.22	377.42
46.30	329.95	287.83	378.22
46.40	330.65	288.45	379.03
46.50	331.36	289.06	379.84
46.60	332.06	289.67	380.65
46.70	332.76	290.29	381.45
46.80	333.47	290.90	382.26
46.90	334.17	291.51	383.07
47.00	334.88	292.13	383.88
47.10	335.58	292.74	384.68
47.20	336.28	293.36	385.49
47.30	336.99	293.97	386.30
47.40	337.69	294.58	387.11
47.50	338.40	295.20	387.91
47.60	339.10	295.81	388.72
47.70	339.80	296.42	389.53
47.80	340.51	297.04	390.34
47.90	341.21	297.65	391.14
48.00	341.91	298.27	391.95
48.10	342.62	298.88	392.76
48.20	343.32	299.49	393.57
48.30	344.03	300.11	394.37
48.40	344.73	300.72	395.18
48.50	345.43	301.33	395.99
48.60	346.14	301.95	396.79
48.70	346.84	302.56	397.60
48.80	347.54	303.17	398.41
48.90	348.25	303.79	399.22
49.00	348.95	304.40	400.02
49.10	349.66	305.01	400.83
49.20	350.36	305.63	401.64
49.30	351.06	306.24	402.44
49.40	351.77	306.85	403.25
49.50	352.47	307.47	404.06
49.60	353.17	308.08	404.87
49.70	353.88	308.69	405.67
49.80	354.58	309.31	406.48
49.90	355.28	309.92	407.29
50.00	355.99	310.53	408.09
50.10	356.69	311.15	408.90
50.20	357.39	311.76	409.71
50.30	358.10	312.37	410.51
50.40	358.80	312.99	411.32
50.50	359.51	313.60	412.13
50.60	360.21	314.21	412.93
50.70	360.91	314.83	413.74
50.80	361.62	315.44	414.55
50.90	362.32	316.05	415.36
51.00	363.02	316.67	416.16
51.10	363.73	317.28	416.97
51.20	364.43	317.89	417.78
51.30	365.13	318.51	418.58
51.40	365.84	319.12	419.39
51.50	366.54	319.73	420.20
51.60	367.24	320.35	421.00
51.70	367.94	320.96	421.81
51.80	368.65	321.57	422.62
51.90	369.35	322.18	423.42
52.00	370.05	322.80	424.23
52.10	370.76	323.41	425.04
52.20	371.46	324.02	425.84
52.30	372.16	324.64	426.65
52.40	372.87	325.25	427.46
52.50	373.57	325.86	428.26
52.60	374.27	326.48	429.07
52.70	374.98	327.09	429.87
52.80	375.68	327.70	430.68
52.90	376.38	328.31	431.49
53.00	377.09	328.93	432.29
53.10	377.79	329.54	433.10
53.20	378.49	330.15	433.91
53.30	379.19	330.77	434.71
53.40	379.90	331.38	435.52
53.50	380.60	331.99	436.33
53.60	381.30	332.60	437.13
53.70	382.01	333.22	437.94
53.80	382.71	333.83	438.74
53.90	383.41	334.44	439.55
54.00	384.11	335.05	440.36
54.10	384.82	335.67	441.16
54.20	385.52	336.28	441.97
54.30	386.22	336.89	442.78
54.40	386.93	337.51	443.58
54.50	387.63	338.12	444.39
54.60	388.33	338.73	445.19
54.70	389.03	339.34	446.00
54.80	389.74	339.96	446.81
54.90	390.44	340.57	447.61
55.00	391.14	341.18	448.42
55.10	391.84	341.79	449.23
55.20	392.55	342.41	450.03
55.30	393.25	343.02	450.84
55.40	393.95	343.63	451.64
55.50	394.66	344.24	452.45
55.60	395.36	344.86	453.26
55.70	396.06	345.47	454.06
55.80	396.76	346.08	454.87
55.90	397.47	346.69	455.67
56.00	398.17	347.31	456.48
56.10	398.87	347.92	457.29
56.20	399.57	348.53	458.09
56.30	400.28	349.14	458.90
56.40	400.98	349.76	459.70
56.50	401.68	350.37	460.51
56.60	402.38	350.98	461.31
56.70	403.09	351.59	462.12
56.80	403.79	352.20	462.93
56.90	404.49	352.82	463.73
57.00	405.19	353.43	464.54
57.10	405.90	354.04	465.34
57.20	406.60	354.65	466.15
57.30	407.30	355.27	466.96
57.40	408.00	355.88	467.76
57.50	408.70	356.49	468.57
57.60	409.41	357.10	469.37
57.70	410.11	357.71	470.18
57.80	410.81	358.33	470.98
57.90	411.51	358.94	471.79
58.00	412.22	359.55	472.60
58.10	412.92	360.16	473.40
58.20	413.62	360.78	474.21
58.30	414.32	361.39	475.01
58.40	415.02	362.00	475.82
58.50	415.73	362.61	476.62
58.60	416.43	363.22	477.43
58.70	417.13	363.84	478.23
58.80	417.83	364.45	479.04
58.90	418.54	365.06	479.85
59.00	419.24	365.67	480.65
59.10	419.94	366.28	481.46
59.20	420.64	366.90	482.26
59.30	421.34	367.51	483.07
59.40	422.05	368.12	483.87
59.50	422.75	368.73	484.68
59.60	423.45	369.34	485.48
59.70	424.15	369.96	486.29
59.80	424.85	370.57	487.09
59.90	425.56	371.18	487.90
60.00	426.26	371.79	488.71
60.10	426.96	372.40	489.51
60.20	427.66	373.01	490.32
60.30	428.36	373.63	491.12
60.40	429.07	374.24	491.93
60.50	429.77	374.85	492.73
60.60	430.47	375.46	493.54
60.70	431.17	376.07	494.34
60.80	431.87	376.69	495.15
60.90	432.58	377.30	495.95
61.00	433.28	377.91	496.76
61.10	433.98	378.52	497.56
61.20	434.68	379.13	498.37
61.30	435.38	379.74	499.17
61.40	436.08	380.36	499.98
61.50	436.79	380.97	500.78
61.60	437.49	381.58	501.59
61.70	438.19	382.19	502.39
61.80	438.89	382.80	503.20
61.90	439.59	383.41	504.00
62.00	440.29	384.03	504.81
62.10	441.00	384.64	505.61
62.20	441.70	385.25	506.42
62.30	442.40	385.86	507.22
62.40	443.10	386.47	508.03
62.50	443.80	387.08	508.83
62.60	444.50	387.69	509.64
62.70	445.21	388.31	510.44
62.80	445.91	388.92	511.25
62.90	446.61	389.53	512.05
63.00	447.31	390.14	512.86
63.10	448.01	390.75	513.66
63.20	448.71	391.36	514.47
63.30	449.42	391.98	515.27
63.40	450.12	392.59	516.08
63.50	450.82	393.20	516.88
63.60	451.52	393.81	517.69
63.70	452.22	394.42	518.49
63.80	452.92	395.03	519.30
63.90	453.62	395.64	520.10
64.00	454.33	396.25	520.91
64.10	455.03	396.87	521.71
64.20	455.73	397.48	522.52
64.30	456.43	398.09	523.32
64.40	457.13	398.70	524.13
64.50	457.83	399.31	524.93
64.60	458.53	399.92	525.74
64.70	459.24	400.53	526.54
64.80	459.94	401.15	527.34
64.90	460.64	401.76	528.15
65.00	461.34	402.37	528.95
65.10	462.04	402.98	529.76
65.20	462.74	403.59	530.56
65.30	463.44	404.20	531.37
65.40	464.14	404.81	532.17
65.50	464.85	405.42	532.98
65.60	465.55	406.03	533.78
65.70	466.25	406.65	534.59
65.80	466.95	407.26	535.39
65.90	467.65	407.87	536.20
66.00	468.35	408.48	537.00
66.10	469.05	409.09	537.80
66.20	469.75	409.70	538.61
66.30	470.46	410.31	539.41
66.40	471.16	410.92	540.22
66.50	471.86	411.53	541.02
66.60	472.56	412.15	541.83
66.70	473.26	412.76	542.63
66.80	473.96	413.37	543.44
66.90	474.66	413.98	544.24
67.00	475.36	414.59	545.04
67.10	476.06	415.20	545.85
67.20	476.76	415.81	546.65
67.30	477.47	416.42	547.46
67.40	478.17	417.03	548.26
67.50	478.87	417.64	549.07
67.60	479.57	418.26	549.87
67.70	480.27	418.87	550.67
67.80	480.97	419.48	551.48
67.90	481.67	420.09	552.28
68.00	482.37	420.70	553.09
68.10	483.07	421.31	553.89
68.20	483.77	421.92	554.70
68.30	484.48	422.53	555.50
68.40	485.18	423.14	556.30
68.50	485.88	423.75	557.11
68.60	486.58	424.36	557.91
68.70	487.28	424.97	558.72
68.80	487.98	425.59	559.52
68.90	488.68	426.20	560.33
69.00	489.38	426.81	561.13
69.10	490.08	427.42	561.93
69.20	490.78	428.03	562.74
69.30	491.48	428.64	563.54
69.40	492.18	429.25	564.35
69.50	492.88	429.86	565.15
69.60	493.59	430.47	565.95
69.70	494.29	431.08	566.76
69.80	494.99	431.69	567.56
69.90	495.69	432.30	568.37
70.00	496.39	432.91	569.17
70.10	497.09	433.52	569.97
70.20	497.79	434.14	570.78
70.30	498.49	434.75	571.58
70.40	499.19	435.36	572.39
70.50	499.89	435.97	573.19
70.60	500.59	436.58	573.99
70.70	501.29	437.19	574.80
70.80	501.99	437.80	575.60
70.90	502.69	438.41	576.41
71.00	503.39	439.02	577.21
71.10	504.10	439.63	578.01
71.20	504.80	440.24	578.82
71.30	505.50	440.85	579.62
71.40	506.20	441.46	580.42
71.50	506.90	442.07	581.23
71.60	507.60	442.68	582.03
71.70	508.30	443.29	582.84
71.80	509.00	443.90	583.64
71.90	509.70	444.51	584.44
72.00	510.40	445.12	585.25
72.10	511.10	445.73	586.05
72.20	511.80	446.35	586.85
72.30	512.50	446.96	587.66
72.40	513.20	447.57	588.46
72.50	513.90	448.18	589.27
72.60	514.60	448.79	590.07
72.70	515.30	449.40	590.87
72.80	516.00	450.01	591.68
72.90	516.70	450.62	592.48
73.00	517.40	451.23	593.28
73.10	518.10	451.84	594.09
73.20	518.80	452.45	594.89
73.30	519.50	453.06	595.70
73.40	520.20	453.67	596.50
73.50	520.90	454.28	597.30
73.60	521.61	454.89	598.11
73.70	522.31	455.50	598.91
73.80	523.01	456.11	599.71
73.90	523.71	456.72	600.52
74.00	524.41	457.33	601.32
74.10	525.11	457.94	602.12
74.20	525.81	458.55	602.93
74.30	526.51	459.16	603.73
74.40	527.21	459.77	604.53
74.50	527.91	460.38	605.34
74.60	528.61	460.99	606.14
74.70	529.31	461.60	606.94
74.80	530.01	462.21	607.75
74.90	530.71	462.82	608.55
75.00	531.41	463.43	609.35
75.10	532.11	464.04	610.16
75.20	532.81	464.65	610.96
75.30	533.51	465.26	611.76
75.40	534.21	465.87	612.57
75.50	534.91	466.48	613.37
75.60	535.61	467.09	614.17
75.70	536.31	467.70	614.98
75.80	537.01	468.31	615.78
75.90	537.71	468.92	616.58
76.00	538.41	469.53	617.39
76.10	539.11	470.14	618.19
76.20	539.81	470.75	618.99
76.30	540.51	471.36	619.80
76.40	541.21	471.97	620.60
76.50	541.91	472.58	621.40
76.60	542.61	473.19	622.21
76.70	543.31	473.80	623.01
76.80	544.01	474.41	623.81
76.90	544.71	475.02	624.62
77.00	545.41	475.63	625.42
77.10	546.11	476.24	626.22
77.20	546.81	476.85	627.03
77.30	547.51	477.46	627.83
77.40	548.21	478.07	628.63
77.50	548.91	478.68	629.44
77.60	549.61	479.29	630.24
77.70	550.31	479.90	631.04
77.80	551.01	480.51	631.85
77.90	551.71	481.12	632.65
78.00	552.41	481.73	633.45
78.10	553.11	482.34	634.25
78.20	553.81	482.95	635.06
78.30	554.51	483.56	635.86
78.40	555.20	484.17	636.66
78.50	555.90	484.78	637.47
78.60	556.60	485.39	638.27
78.70	557.30	486.00	639.07
78.80	558.00	486.61	639.88
78.90	558.70	487.22	640.68
79.00	559.40	487.83	641.48
79.10	560.10	488.44	642.28
79.20	560.80	489.05	643.09
79.30	561.50	489.66	643.89
79.40	562.20	490.27	644.69
79.50	562.90	490.87	645.50
79.60	563.60	491.48	646.30
79.70	564.30	492.09	647.10
79.80	565.00	492.70	647.90
79.90	565.70	493.31	648.71
80.00	566.40	493.92	649.51
80.10	567.10	494.53	650.31
80.20	567.80	495.14	651.12
80.30	568.50	495.75	651.92
80.40	569.20	496.36	652.72
80.50	569.90	496.97	653.52
80.60	570.60	497.58	654.33
80.70	571.30	498.19	655.13
80.80	572.00	498.80	655.93
80.90	572.69	499.41	656.74
81.00	573.39	500.02	657.54
81.10	574.09	500.63	658.34
81.20	574.79	501.24	659.14
81.30	575.49	501.85	659.95
81.40	576.19	502.46	660.75
81.50	576.89	503.07	661.55
81.60	577.59	503.67	662.35
81.70	578.29	504.28	663.16
81.80	578.99	504.89	663.96
81.90	579.69	505.50	664.76
82.00	580.39	506.11	665.57
82.10	581.09	506.72	666.37
82.20	581.79	507.33	667.17
82.30	582.49	507.94	667.97
82.40	583.19	508.55	668.78
82.50	583.88	509.16	669.58
