# Supplementary material
Source: MDPI journal article supplement (https://www.mdpi.com/2504-446X/8/3/115)
Supplement: s1 [file s1 › Table S8 Crocodylus palustris Framework.csv]

Head Length (cm)	Fit (estimation) (cm)	Lower limit (95% confidence interval) (cm)	Upper limit (95% confidence interval) (cm)
2.70	26.90	20.46	35.36
2.80	27.70	21.08	36.39
2.90	28.49	21.70	37.41
3.00	29.28	22.32	38.42
3.10	30.07	22.93	39.42
3.20	30.85	23.54	40.42
3.30	31.62	24.14	41.41
3.40	32.39	24.75	42.40
3.50	33.16	25.34	43.38
3.60	33.92	25.94	44.35
3.70	34.68	26.53	45.32
3.80	35.43	27.12	46.29
3.90	36.18	27.71	47.24
4.00	36.93	28.29	48.20
4.10	37.67	28.87	49.15
4.20	38.41	29.45	50.09
4.30	39.14	30.03	51.03
4.40	39.88	30.60	51.96
4.50	40.61	31.17	52.90
4.60	41.33	31.74	53.82
4.70	42.05	32.31	54.74
4.80	42.77	32.87	55.66
4.90	43.49	33.43	56.58
5.00	44.21	33.99	57.49
5.10	44.92	34.55	58.40
5.20	45.63	35.10	59.30
5.30	46.33	35.66	60.20
5.40	47.04	36.21	61.10
5.50	47.74	36.76	61.99
5.60	48.44	37.31	62.88
5.70	49.13	37.85	63.77
5.80	49.83	38.40	64.66
5.90	50.52	38.94	65.54
6.00	51.21	39.48	66.42
6.10	51.89	40.02	67.29
6.20	52.58	40.56	68.16
6.30	53.26	41.09	69.03
6.40	53.94	41.62	69.90
6.50	54.62	42.16	70.77
6.60	55.30	42.69	71.63
6.70	55.97	43.22	72.49
6.80	56.64	43.75	73.35
6.90	57.31	44.27	74.20
7.00	57.98	44.80	75.05
7.10	58.65	45.32	75.90
7.20	59.32	45.84	76.75
7.30	59.98	46.36	77.59
7.40	60.64	46.88	78.44
7.50	61.30	47.40	79.28
7.60	61.96	47.92	80.12
7.70	62.61	48.43	80.95
7.80	63.27	48.95	81.79
7.90	63.92	49.46	82.62
8.00	64.57	49.97	83.45
8.10	65.22	50.48	84.28
8.20	65.87	50.99	85.10
8.30	66.52	51.50	85.93
8.40	67.17	52.00	86.75
8.50	67.81	52.51	87.57
8.60	68.45	53.01	88.39
8.70	69.09	53.52	89.20
8.80	69.73	54.02	90.02
8.90	70.37	54.52	90.83
9.00	71.01	55.02	91.64
9.10	71.64	55.52	92.45
9.20	72.28	56.02	93.26
9.30	72.91	56.51	94.07
9.40	73.54	57.01	94.87
9.50	74.17	57.50	95.67
9.60	74.80	58.00	96.47
9.70	75.43	58.49	97.27
9.80	76.06	58.98	98.07
9.90	76.68	59.47	98.87
10.00	77.30	59.96	99.66
10.10	77.93	60.45	100.45
10.20	78.55	60.94	101.25
10.30	79.17	61.43	102.04
10.40	79.79	61.91	102.82
10.50	80.41	62.40	103.61
10.60	81.02	62.88	104.40
10.70	81.64	63.36	105.18
10.80	82.25	63.85	105.97
10.90	82.87	64.33	106.75
11.00	83.48	64.81	107.53
11.10	84.09	65.29	108.31
11.20	84.70	65.77	109.08
11.30	85.31	66.25	109.86
11.40	85.92	66.72	110.63
11.50	86.53	67.20	111.41
11.60	87.13	67.68	112.18
11.70	87.74	68.15	112.95
11.80	88.34	68.63	113.72
11.90	88.94	69.10	114.49
12.00	89.55	69.57	115.26
12.10	90.15	70.04	116.02
12.20	90.75	70.51	116.79
12.30	91.35	70.98	117.55
12.40	91.95	71.45	118.31
12.50	92.54	71.92	119.07
12.60	93.14	72.39	119.83
12.70	93.73	72.86	120.59
12.80	94.33	73.32	121.35
12.90	94.92	73.79	122.11
13.00	95.52	74.26	122.86
13.10	96.11	74.72	123.62
13.20	96.70	75.18	124.37
13.30	97.29	75.65	125.12
13.40	97.88	76.11	125.88
13.50	98.47	76.57	126.63
13.60	99.06	77.03	127.37
13.70	99.64	77.49	128.12
13.80	100.23	77.95	128.87
13.90	100.81	78.41	129.62
14.00	101.40	78.87	130.36
14.10	101.98	79.33	131.10
14.20	102.56	79.78	131.85
14.30	103.15	80.24	132.59
14.40	103.73	80.70	133.33
14.50	104.31	81.15	134.07
14.60	104.89	81.61	134.81
14.70	105.47	82.06	135.55
14.80	106.04	82.51	136.29
14.90	106.62	82.97	137.02
15.00	107.20	83.42	137.76
15.10	107.77	83.87	138.49
15.20	108.35	84.32	139.22
15.30	108.92	84.77	139.96
15.40	109.50	85.22	140.69
15.50	110.07	85.67	141.42
15.60	110.64	86.12	142.15
15.70	111.21	86.57	142.88
15.80	111.79	87.01	143.61
15.90	112.36	87.46	144.33
16.00	112.92	87.91	145.06
16.10	113.49	88.35	145.79
16.20	114.06	88.80	146.51
16.30	114.63	89.24	147.23
16.40	115.20	89.69	147.96
16.50	115.76	90.13	148.68
16.60	116.33	90.57	149.40
16.70	116.89	91.02	150.12
16.80	117.46	91.46	150.84
16.90	118.02	91.90	151.56
17.00	118.58	92.34	152.28
17.10	119.14	92.78	153.00
17.20	119.71	93.22	153.71
17.30	120.27	93.66	154.43
17.40	120.83	94.10	155.14
17.50	121.39	94.54	155.86
17.60	121.95	94.98	156.57
17.70	122.50	95.41	157.28
17.80	123.06	95.85	158.00
17.90	123.62	96.29	158.71
18.00	124.17	96.72	159.42
18.10	124.73	97.16	160.13
18.20	125.29	97.59	160.84
18.30	125.84	98.03	161.54
18.40	126.40	98.46	162.25
18.50	126.95	98.90	162.96
18.60	127.50	99.33	163.67
18.70	128.05	99.76	164.37
18.80	128.61	100.19	165.08
18.90	129.16	100.63	165.78
19.00	129.71	101.06	166.48
19.10	130.26	101.49	167.19
19.20	130.81	101.92	167.89
19.30	131.36	102.35	168.59
19.40	131.91	102.78	169.29
19.50	132.45	103.21	169.99
19.60	133.00	103.63	170.69
19.70	133.55	104.06	171.39
19.80	134.09	104.49	172.08
19.90	134.64	104.92	172.78
20.00	135.19	105.34	173.48
20.10	135.73	105.77	174.17
20.20	136.27	106.20	174.87
20.30	136.82	106.62	175.56
20.40	137.36	107.05	176.26
20.50	137.90	107.47	176.95
20.60	138.45	107.90	177.65
20.70	138.99	108.32	178.34
20.80	139.53	108.74	179.03
20.90	140.07	109.17	179.72
21.00	140.61	109.59	180.41
21.10	141.15	110.01	181.10
21.20	141.69	110.43	181.79
21.30	142.23	110.85	182.48
21.40	142.77	111.28	183.17
21.50	143.30	111.70	183.85
21.60	143.84	112.12	184.54
21.70	144.38	112.54	185.23
21.80	144.91	112.96	185.91
21.90	145.45	113.37	186.60
22.00	145.98	113.79	187.28
22.10	146.52	114.21	187.96
22.20	147.05	114.63	188.65
22.30	147.59	115.05	189.33
22.40	148.12	115.46	190.01
22.50	148.65	115.88	190.69
22.60	149.19	116.30	191.37
22.70	149.72	116.71	192.06
22.80	150.25	117.13	192.74
22.90	150.78	117.54	193.41
23.00	151.31	117.96	194.09
23.10	151.84	118.37	194.77
23.20	152.37	118.79	195.45
23.30	152.90	119.20	196.13
23.40	153.43	119.62	196.80
23.50	153.96	120.03	197.48
23.60	154.49	120.44	198.15
23.70	155.01	120.85	198.83
23.80	155.54	121.27	199.50
23.90	156.07	121.68	200.18
24.00	156.59	122.09	200.85
24.10	157.12	122.50	201.52
24.20	157.65	122.91	202.20
24.30	158.17	123.32	202.87
24.40	158.69	123.73	203.54
24.50	159.22	124.14	204.21
24.60	159.74	124.55	204.88
24.70	160.27	124.96	205.55
24.80	160.79	125.37	206.22
24.90	161.31	125.77	206.89
25.00	161.83	126.18	207.56
25.10	162.36	126.59	208.23
25.20	162.88	127.00	208.89
25.30	163.40	127.40	209.56
25.40	163.92	127.81	210.23
25.50	164.44	128.22	210.89
25.60	164.96	128.62	211.56
25.70	165.48	129.03	212.22
25.80	166.00	129.43	212.89
25.90	166.52	129.84	213.55
26.00	167.03	130.24	214.22
26.10	167.55	130.65	214.88
26.20	168.07	131.05	215.54
26.30	168.59	131.46	216.20
26.40	169.10	131.86	216.87
26.50	169.62	132.26	217.53
26.60	170.13	132.67	218.19
26.70	170.65	133.07	218.85
26.80	171.17	133.47	219.51
26.90	171.68	133.87	220.17
27.00	172.19	134.27	220.83
27.10	172.71	134.67	221.48
27.20	173.22	135.08	222.14
27.30	173.74	135.48	222.80
27.40	174.25	135.88	223.46
27.50	174.76	136.28	224.11
27.60	175.27	136.68	224.77
27.70	175.79	137.08	225.43
27.80	176.30	137.48	226.08
27.90	176.81	137.87	226.74
28.00	177.32	138.27	227.39
28.10	177.83	138.67	228.05
28.20	178.34	139.07	228.70
28.30	178.85	139.47	229.35
28.40	179.36	139.86	230.01
28.50	179.87	140.26	230.66
28.60	180.38	140.66	231.31
28.70	180.88	141.05	231.96
28.80	181.39	141.45	232.61
28.90	181.90	141.85	233.26
29.00	182.41	142.24	233.91
29.10	182.91	142.64	234.56
29.20	183.42	143.03	235.21
29.30	183.93	143.43	235.86
29.40	184.43	143.82	236.51
29.50	184.94	144.22	237.16
29.60	185.44	144.61	237.81
29.70	185.95	145.00	238.46
29.80	186.45	145.40	239.10
29.90	186.96	145.79	239.75
30.00	187.46	146.18	240.40
30.10	187.97	146.58	241.04
30.20	188.47	146.97	241.69
30.30	188.97	147.36	242.33
30.40	189.48	147.75	242.98
30.50	189.98	148.15	243.62
30.60	190.48	148.54	244.27
30.70	190.98	148.93	244.91
30.80	191.48	149.32	245.55
30.90	191.98	149.71	246.20
31.00	192.49	150.10	246.84
31.10	192.99	150.49	247.48
31.20	193.49	150.88	248.12
31.30	193.99	151.27	248.77
31.40	194.49	151.66	249.41
31.50	194.98	152.05	250.05
31.60	195.48	152.44	250.69
31.70	195.98	152.83	251.33
31.80	196.48	153.21	251.97
31.90	196.98	153.60	252.61
32.00	197.48	153.99	253.24
32.10	197.97	154.38	253.88
32.20	198.47	154.76	254.52
32.30	198.97	155.15	255.16
32.40	199.46	155.54	255.80
32.50	199.96	155.92	256.43
32.60	200.46	156.31	257.07
32.70	200.95	156.70	257.71
32.80	201.45	157.08	258.34
32.90	201.94	157.47	258.98
33.00	202.44	157.85	259.61
33.10	202.93	158.24	260.25
33.20	203.43	158.62	260.88
33.30	203.92	159.01	261.52
33.40	204.41	159.39	262.15
33.50	204.91	159.78	262.79
33.60	205.40	160.16	263.42
33.70	205.89	160.54	264.05
33.80	206.39	160.93	264.68
33.90	206.88	161.31	265.32
34.00	207.37	161.69	265.95
34.10	207.86	162.08	266.58
34.20	208.35	162.46	267.21
34.30	208.84	162.84	267.84
34.40	209.33	163.22	268.47
34.50	209.83	163.61	269.10
34.60	210.32	163.99	269.73
34.70	210.81	164.37	270.36
34.80	211.29	164.75	270.99
34.90	211.78	165.13	271.62
35.00	212.27	165.51	272.25
35.10	212.76	165.89	272.88
35.20	213.25	166.27	273.50
35.30	213.74	166.65	274.13
35.40	214.23	167.03	274.76
35.50	214.72	167.41	275.39
35.60	215.20	167.79	276.01
35.70	215.69	168.17	276.64
35.80	216.18	168.55	277.27
35.90	216.66	168.93	277.89
36.00	217.15	169.31	278.52
36.10	217.64	169.68	279.14
36.20	218.12	170.06	279.77
36.30	218.61	170.44	280.39
36.40	219.09	170.82	281.01
36.50	219.58	171.19	281.64
36.60	220.06	171.57	282.26
36.70	220.55	171.95	282.88
36.80	221.03	172.33	283.51
36.90	221.52	172.70	284.13
37.00	222.00	173.08	284.75
37.10	222.48	173.45	285.37
37.20	222.97	173.83	286.00
37.30	223.45	174.21	286.62
37.40	223.93	174.58	287.24
37.50	224.42	174.96	287.86
37.60	224.90	175.33	288.48
37.70	225.38	175.71	289.10
37.80	225.86	176.08	289.72
37.90	226.35	176.46	290.34
38.00	226.83	176.83	290.96
38.10	227.31	177.20	291.58
38.20	227.79	177.58	292.20
38.30	228.27	177.95	292.81
38.40	228.75	178.33	293.43
38.50	229.23	178.70	294.05
38.60	229.71	179.07	294.67
38.70	230.19	179.44	295.29
38.80	230.67	179.82	295.90
38.90	231.15	180.19	296.52
39.00	231.63	180.56	297.14
39.10	232.11	180.93	297.75
39.20	232.58	181.31	298.37
39.30	233.06	181.68	298.98
39.40	233.54	182.05	299.60
39.50	234.02	182.42	300.21
39.60	234.50	182.79	300.83
39.70	234.97	183.16	301.44
39.80	235.45	183.53	302.06
39.90	235.93	183.90	302.67
40.00	236.40	184.27	303.28
40.10	236.88	184.64	303.90
40.20	237.36	185.01	304.51
40.30	237.83	185.38	305.12
40.40	238.31	185.75	305.74
40.50	238.78	186.12	306.35
40.60	239.26	186.49	306.96
40.70	239.73	186.86	307.57
40.80	240.21	187.23	308.18
40.90	240.68	187.60	308.79
41.00	241.16	187.97	309.40
41.10	241.63	188.33	310.02
41.20	242.11	188.70	310.63
41.30	242.58	189.07	311.24
41.40	243.05	189.44	311.85
41.50	243.53	189.80	312.46
41.60	244.00	190.17	313.06
41.70	244.47	190.54	313.67
41.80	244.95	190.91	314.28
41.90	245.42	191.27	314.89
42.00	245.89	191.64	315.50
42.10	246.36	192.01	316.11
42.20	246.83	192.37	316.71
42.30	247.31	192.74	317.32
42.40	247.78	193.10	317.93
42.50	248.25	193.47	318.54
42.60	248.72	193.83	319.14
42.70	249.19	194.20	319.75
42.80	249.66	194.57	320.36
42.90	250.13	194.93	320.96
43.00	250.60	195.30	321.57
43.10	251.07	195.66	322.17
43.20	251.54	196.02	322.78
43.30	252.01	196.39	323.38
43.40	252.48	196.75	323.99
43.50	252.95	197.12	324.59
43.60	253.42	197.48	325.20
43.70	253.88	197.84	325.80
43.80	254.35	198.21	326.40
43.90	254.82	198.57	327.01
44.00	255.29	198.93	327.61
44.10	255.76	199.30	328.21
44.20	256.22	199.66	328.82
44.30	256.69	200.02	329.42
44.40	257.16	200.38	330.02
44.50	257.63	200.75	330.62
44.60	258.09	201.11	331.22
44.70	258.56	201.47	331.83
44.80	259.02	201.83	332.43
44.90	259.49	202.19	333.03
45.00	259.96	202.55	333.63
45.10	260.42	202.91	334.23
45.20	260.89	203.28	334.83
45.30	261.35	203.64	335.43
45.40	261.82	204.00	336.03
45.50	262.28	204.36	336.63
45.60	262.75	204.72	337.23
45.70	263.21	205.08	337.83
45.80	263.68	205.44	338.43
45.90	264.14	205.80	339.02
46.00	264.60	206.16	339.62
46.10	265.07	206.52	340.22
46.20	265.53	206.88	340.82
46.30	266.00	207.24	341.42
46.40	266.46	207.59	342.01
46.50	266.92	207.95	342.61
46.60	267.38	208.31	343.21
46.70	267.85	208.67	343.81
46.80	268.31	209.03	344.40
46.90	268.77	209.39	345.00
47.00	269.23	209.75	345.59
47.10	269.70	210.10	346.19
47.20	270.16	210.46	346.79
47.30	270.62	210.82	347.38
47.40	271.08	211.18	347.98
47.50	271.54	211.53	348.57
47.60	272.00	211.89	349.17
47.70	272.46	212.25	349.76
47.80	272.92	212.60	350.35
47.90	273.38	212.96	350.95
48.00	273.84	213.32	351.54
48.10	274.30	213.67	352.14
48.20	274.76	214.03	352.73
48.30	275.22	214.39	353.32
48.40	275.68	214.74	353.92
48.50	276.14	215.10	354.51
48.60	276.60	215.45	355.10
48.70	277.06	215.81	355.69
48.80	277.52	216.16	356.29
48.90	277.98	216.52	356.88
49.00	278.43	216.87	357.47
49.10	278.89	217.23	358.06
49.20	279.35	217.58	358.65
49.30	279.81	217.94	359.24
49.40	280.27	218.29	359.83
49.50	280.72	218.65	360.42
49.60	281.18	219.00	361.02
49.70	281.64	219.35	361.61
49.80	282.09	219.71	362.20
49.90	282.55	220.06	362.79
50.00	283.01	220.41	363.37
50.10	283.46	220.77	363.96
50.20	283.92	221.12	364.55
50.30	284.37	221.47	365.14
50.40	284.83	221.83	365.73
50.50	285.29	222.18	366.32
50.60	285.74	222.53	366.91
50.70	286.20	222.88	367.50
50.80	286.65	223.24	368.08
50.90	287.11	223.59	368.67
51.00	287.56	223.94	369.26
51.10	288.02	224.29	369.85
51.20	288.47	224.64	370.43
51.30	288.92	224.99	371.02
51.40	289.38	225.35	371.61
51.50	289.83	225.70	372.19
51.60	290.29	226.05	372.78
51.70	290.74	226.40	373.37
51.80	291.19	226.75	373.95
51.90	291.65	227.10	374.54
52.00	292.10	227.45	375.12
52.10	292.55	227.80	375.71
52.20	293.01	228.15	376.29
52.30	293.46	228.50	376.88
52.40	293.91	228.85	377.46
52.50	294.36	229.20	378.05
52.60	294.81	229.55	378.63
52.70	295.27	229.90	379.22
52.80	295.72	230.25	379.80
52.90	296.17	230.60	380.38
53.00	296.62	230.95	380.97
53.10	297.07	231.30	381.55
53.20	297.52	231.65	382.13
53.30	297.97	232.00	382.72
53.40	298.42	232.34	383.30
53.50	298.87	232.69	383.88
53.60	299.33	233.04	384.46
53.70	299.78	233.39	385.05
53.80	300.23	233.74	385.63
53.90	300.68	234.08	386.21
54.00	301.13	234.43	386.79
54.10	301.57	234.78	387.37
54.20	302.02	235.13	387.95
54.30	302.47	235.47	388.53
54.40	302.92	235.82	389.12
54.50	303.37	236.17	389.70
54.60	303.82	236.52	390.28
54.70	304.27	236.86	390.86
54.80	304.72	237.21	391.44
54.90	305.17	237.56	392.02
55.00	305.61	237.90	392.60
55.10	306.06	238.25	393.18
55.20	306.51	238.59	393.75
55.30	306.96	238.94	394.33
55.40	307.40	239.29	394.91
55.50	307.85	239.63	395.49
55.60	308.30	239.98	396.07
55.70	308.75	240.32	396.65
55.80	309.19	240.67	397.23
55.90	309.64	241.01	397.80
56.00	310.09	241.36	398.38
56.10	310.53	241.70	398.96
56.20	310.98	242.05	399.54
56.30	311.42	242.39	400.11
56.40	311.87	242.74	400.69
56.50	312.32	243.08	401.27
56.60	312.76	243.43	401.85
56.70	313.21	243.77	402.42
56.80	313.65	244.12	403.00
56.90	314.10	244.46	403.57
57.00	314.54	244.80	404.15
57.10	314.99	245.15	404.73
57.20	315.43	245.49	405.30
57.30	315.88	245.83	405.88
57.40	316.32	246.18	406.45
57.50	316.77	246.52	407.03
57.60	317.21	246.86	407.60
57.70	317.65	247.21	408.18
57.80	318.10	247.55	408.75
57.90	318.54	247.89	409.33
58.00	318.99	248.23	409.90
58.10	319.43	248.58	410.48
58.20	319.87	248.92	411.05
58.30	320.31	249.26	411.62
58.40	320.76	249.60	412.20
58.50	321.20	249.95	412.77
58.60	321.64	250.29	413.34
58.70	322.09	250.63	413.92
58.80	322.53	250.97	414.49
58.90	322.97	251.31	415.06
59.00	323.41	251.65	415.63
59.10	323.85	251.99	416.21
59.20	324.30	252.34	416.78
59.30	324.74	252.68	417.35
59.40	325.18	253.02	417.92
59.50	325.62	253.36	418.49
59.60	326.06	253.70	419.07
59.70	326.50	254.04	419.64
59.80	326.94	254.38	420.21
59.90	327.38	254.72	420.78
60.00	327.83	255.06	421.35
60.10	328.27	255.40	421.92
60.20	328.71	255.74	422.49
60.30	329.15	256.08	423.06
60.40	329.59	256.42	423.63
60.50	330.03	256.76	424.20
60.60	330.47	257.10	424.77
60.70	330.91	257.44	425.34
60.80	331.34	257.78	425.91
60.90	331.78	258.12	426.48
61.00	332.22	258.45	427.05
61.10	332.66	258.79	427.62
61.20	333.10	259.13	428.19
61.30	333.54	259.47	428.76
61.40	333.98	259.81	429.32
61.50	334.42	260.15	429.89
61.60	334.86	260.49	430.46
61.70	335.29	260.82	431.03
61.80	335.73	261.16	431.60
61.90	336.17	261.50	432.16
62.00	336.61	261.84	432.73
62.10	337.05	262.17	433.30
62.20	337.48	262.51	433.87
62.30	337.92	262.85	434.43
62.40	338.36	263.19	435.00
62.50	338.80	263.52	435.57
62.60	339.23	263.86	436.13
62.70	339.67	264.20	436.70
62.80	340.11	264.53	437.27
62.90	340.54	264.87	437.83
63.00	340.98	265.21	438.40
63.10	341.42	265.54	438.96
63.20	341.85	265.88	439.53
63.30	342.29	266.22	440.09
63.40	342.72	266.55	440.66
63.50	343.16	266.89	441.23
63.60	343.59	267.23	441.79
63.70	344.03	267.56	442.35
63.80	344.47	267.90	442.92
63.90	344.90	268.23	443.48
64.00	345.34	268.57	444.05
64.10	345.77	268.90	444.61
64.20	346.21	269.24	445.18
64.30	346.64	269.57	445.74
64.40	347.08	269.91	446.30
64.50	347.51	270.24	446.87
64.60	347.94	270.58	447.43
64.70	348.38	270.91	447.99
64.80	348.81	271.25	448.56
64.90	349.25	271.58	449.12
65.00	349.68	271.92	449.68
65.10	350.11	272.25	450.25
65.20	350.55	272.59	450.81
65.30	350.98	272.92	451.37
65.40	351.41	273.25	451.93
65.50	351.85	273.59	452.50
65.60	352.28	273.92	453.06
65.70	352.71	274.25	453.62
65.80	353.15	274.59	454.18
65.90	353.58	274.92	454.74
66.00	354.01	275.25	455.30
66.10	354.44	275.59	455.86
66.20	354.88	275.92	456.43
66.30	355.31	276.25	456.99
66.40	355.74	276.59	457.55
66.50	356.17	276.92	458.11
66.60	356.60	277.25	458.67
66.70	357.04	277.58	459.23
66.80	357.47	277.92	459.79
66.90	357.90	278.25	460.35
67.00	358.33	278.58	460.91
67.10	358.76	278.91	461.47
67.20	359.19	279.25	462.03
67.30	359.62	279.58	462.59
67.40	360.05	279.91	463.15
67.50	360.49	280.24	463.71
67.60	360.92	280.57	464.26
67.70	361.35	280.90	464.82
67.80	361.78	281.24	465.38
67.90	362.21	281.57	465.94
68.00	362.64	281.90	466.50
68.10	363.07	282.23	467.06
68.20	363.50	282.56	467.62
68.30	363.93	282.89	468.17
68.40	364.36	283.22	468.73
68.50	364.79	283.55	469.29
68.60	365.21	283.88	469.85
68.70	365.64	284.21	470.40
68.80	366.07	284.54	470.96
68.90	366.50	284.87	471.52
69.00	366.93	285.20	472.07
69.10	367.36	285.54	472.63
69.20	367.79	285.87	473.19
69.30	368.22	286.19	473.74
69.40	368.64	286.52	474.30
69.50	369.07	286.85	474.86
69.60	369.50	287.18	475.41
69.70	369.93	287.51	475.97
69.80	370.36	287.84	476.53
69.90	370.78	288.17	477.08
70.00	371.21	288.50	477.64
70.10	371.64	288.83	478.19
70.20	372.07	289.16	478.75
70.30	372.49	289.49	479.30
70.40	372.92	289.82	479.86
70.50	373.35	290.15	480.41
70.60	373.78	290.47	480.97
70.70	374.20	290.80	481.52
70.80	374.63	291.13	482.08
70.90	375.06	291.46	482.63
71.00	375.48	291.79	483.18
71.10	375.91	292.12	483.74
71.20	376.34	292.44	484.29
71.30	376.76	292.77	484.85
71.40	377.19	293.10	485.40
71.50	377.61	293.43	485.95
71.60	378.04	293.75	486.51
71.70	378.46	294.08	487.06
71.80	378.89	294.41	487.61
71.90	379.32	294.74	488.17
72.00	379.74	295.06	488.72
72.10	380.17	295.39	489.27
72.20	380.59	295.72	489.82
72.30	381.02	296.04	490.38
72.40	381.44	296.37	490.93
72.50	381.87	296.70	491.48
72.60	382.29	297.03	492.03
72.70	382.72	297.35	492.58
72.80	383.14	297.68	493.14
72.90	383.56	298.00	493.69
73.00	383.99	298.33	494.24
73.10	384.41	298.66	494.79
73.20	384.84	298.98	495.34
73.30	385.26	299.31	495.89
73.40	385.68	299.63	496.44
73.50	386.11	299.96	497.00
73.60	386.53	300.29	497.55
73.70	386.95	300.61	498.10
73.80	387.38	300.94	498.65
73.90	387.80	301.26	499.20
74.00	388.22	301.59	499.75
74.10	388.65	301.91	500.30
74.20	389.07	302.24	500.85
74.30	389.49	302.56	501.40
74.40	389.91	302.89	501.95
74.50	390.34	303.21	502.50
74.60	390.76	303.54	503.05
74.70	391.18	303.86	503.59
74.80	391.60	304.19	504.14
74.90	392.03	304.51	504.69
75.00	392.45	304.84	505.24
75.10	392.87	305.16	505.79
75.20	393.29	305.48	506.34
75.30	393.71	305.81	506.89
75.40	394.14	306.13	507.44
75.50	394.56	306.46	507.98
75.60	394.98	306.78	508.53
75.70	395.40	307.10	509.08
75.80	395.82	307.43	509.63
75.90	396.24	307.75	510.18
76.00	396.66	308.07	510.72
76.10	397.08	308.40	511.27
76.20	397.50	308.72	511.82
76.30	397.92	309.04	512.37
76.40	398.34	309.37	512.91
76.50	398.77	309.69	513.46
76.60	399.19	310.01	514.01
76.70	399.61	310.34	514.55
76.80	400.03	310.66	515.10
76.90	400.45	310.98	515.65
77.00	400.87	311.30	516.19
77.10	401.28	311.63	516.74
77.20	401.70	311.95	517.29
77.30	402.12	312.27	517.83
77.40	402.54	312.59	518.38
77.50	402.96	312.92	518.92
77.60	403.38	313.24	519.47
77.70	403.80	313.56	520.01
77.80	404.22	313.88	520.56
77.90	404.64	314.20	521.10
78.00	405.06	314.52	521.65
78.10	405.48	314.85	522.19
78.20	405.90	315.17	522.74
78.30	406.31	315.49	523.28
78.40	406.73	315.81	523.83
78.50	407.15	316.13	524.37
78.60	407.57	316.45	524.92
78.70	407.99	316.77	525.46
78.80	408.40	317.09	526.01
78.90	408.82	317.42	526.55
79.00	409.24	317.74	527.09
79.10	409.66	318.06	527.64
79.20	410.08	318.38	528.18
79.30	410.49	318.70	528.73
79.40	410.91	319.02	529.27
79.50	411.33	319.34	529.81
79.60	411.74	319.66	530.36
79.70	412.16	319.98	530.90
79.80	412.58	320.30	531.44
79.90	412.99	320.62	531.98
80.00	413.41	320.94	532.53
80.10	413.83	321.26	533.07
80.20	414.24	321.58	533.61
80.30	414.66	321.90	534.15
80.40	415.08	322.22	534.70
80.50	415.49	322.54	535.24
80.60	415.91	322.86	535.78
80.70	416.33	323.18	536.32
80.80	416.74	323.50	536.87
80.90	417.16	323.82	537.41
81.00	417.57	324.13	537.95
81.10	417.99	324.45	538.49
81.20	418.40	324.77	539.03
81.30	418.82	325.09	539.57
81.40	419.24	325.41	540.11
81.50	419.65	325.73	540.65
81.60	420.07	326.05	541.20
81.70	420.48	326.37	541.74
81.80	420.90	326.68	542.28
81.90	421.31	327.00	542.82
82.00	421.73	327.32	543.36
82.10	422.14	327.64	543.90
82.20	422.55	327.96	544.44
82.30	422.97	328.28	544.98
82.40	423.38	328.59	545.52
82.50	423.80	328.91	546.06
