# Supplementary material
Source: MDPI journal article supplement (https://www.mdpi.com/2504-446X/8/3/115)
Supplement: s1 [file s1 › Table S9 Crocodylus porosus Framework.csv]

Head Length (cm)	Fit (estimation) (cm)	Lower limit (95% confidence interval) (cm)	Upper limit (95% confidence interval) (cm)
2.70	16.85	15.47	18.36
2.80	17.51	16.08	19.07
2.90	18.17	16.68	19.79
3.00	18.83	17.29	20.51
3.10	19.49	17.90	21.23
3.20	20.16	18.51	21.95
3.30	20.82	19.12	22.67
3.40	21.49	19.73	23.40
3.50	22.15	20.34	24.12
3.60	22.82	20.96	24.85
3.70	23.49	21.57	25.58
3.80	24.16	22.19	26.30
3.90	24.83	22.80	27.03
4.00	25.50	23.42	27.76
4.10	26.17	24.04	28.49
4.20	26.84	24.66	29.23
4.30	27.52	25.27	29.96
4.40	28.19	25.89	30.69
4.50	28.87	26.51	31.43
4.60	29.54	27.14	32.16
4.70	30.22	27.76	32.90
4.80	30.90	28.38	33.64
4.90	31.58	29.00	34.37
5.00	32.25	29.63	35.11
5.10	32.93	30.25	35.85
5.20	33.61	30.88	36.59
5.30	34.30	31.51	37.33
5.40	34.98	32.13	38.08
5.50	35.66	32.76	38.82
5.60	36.34	33.39	39.56
5.70	37.03	34.02	40.31
5.80	37.71	34.65	41.05
5.90	38.40	35.28	41.80
6.00	39.08	35.91	42.54
6.10	39.77	36.54	43.29
6.20	40.46	37.17	44.04
6.30	41.14	37.80	44.79
6.40	41.83	38.43	45.53
6.50	42.52	39.06	46.28
6.60	43.21	39.70	47.03
6.70	43.90	40.33	47.78
6.80	44.59	40.97	48.54
6.90	45.28	41.60	49.29
7.00	45.97	42.24	50.04
7.10	46.67	42.87	50.79
7.20	47.36	43.51	51.55
7.30	48.05	44.15	52.30
7.40	48.74	44.78	53.06
7.50	49.44	45.42	53.81
7.60	50.13	46.06	54.57
7.70	50.83	46.70	55.32
7.80	51.52	47.34	56.08
7.90	52.22	47.98	56.84
8.00	52.92	48.62	57.60
8.10	53.61	49.26	58.35
8.20	54.31	49.90	59.11
8.30	55.01	50.54	59.87
8.40	55.71	51.18	60.63
8.50	56.41	51.82	61.39
8.60	57.11	52.47	62.15
8.70	57.80	53.11	62.92
8.80	58.50	53.75	63.68
8.90	59.21	54.40	64.44
9.00	59.91	55.04	65.20
9.10	60.61	55.68	65.97
9.20	61.31	56.33	66.73
9.30	62.01	56.97	67.49
9.40	62.71	57.62	68.26
9.50	63.42	58.27	69.02
9.60	64.12	58.91	69.79
9.70	64.82	59.56	70.56
9.80	65.53	60.20	71.32
9.90	66.23	60.85	72.09
10.00	66.94	61.50	72.86
10.10	67.64	62.15	73.62
10.20	68.35	62.80	74.39
10.30	69.05	63.44	75.16
10.40	69.76	64.09	75.93
10.50	70.47	64.74	76.70
10.60	71.17	65.39	77.47
10.70	71.88	66.04	78.24
10.80	72.59	66.69	79.01
10.90	73.30	67.34	79.78
11.00	74.01	67.99	80.55
11.10	74.72	68.64	81.32
11.20	75.42	69.30	82.09
11.30	76.13	69.95	82.87
11.40	76.84	70.60	83.64
11.50	77.55	71.25	84.41
11.60	78.26	71.90	85.19
11.70	78.98	72.56	85.96
11.80	79.69	73.21	86.73
11.90	80.40	73.86	87.51
12.00	81.11	74.52	88.28
12.10	81.82	75.17	89.06
12.20	82.53	75.83	89.84
12.30	83.25	76.48	90.61
12.40	83.96	77.14	91.39
12.50	84.67	77.79	92.16
12.60	85.39	78.45	92.94
12.70	86.10	79.10	93.72
12.80	86.82	79.76	94.50
12.90	87.53	80.41	95.27
13.00	88.24	81.07	96.05
13.10	88.96	81.73	96.83
13.20	89.68	82.38	97.61
13.30	90.39	83.04	98.39
13.40	91.11	83.70	99.17
13.50	91.82	84.36	99.95
13.60	92.54	85.02	100.73
13.70	93.26	85.67	101.51
13.80	93.97	86.33	102.29
13.90	94.69	86.99	103.07
14.00	95.41	87.65	103.85
14.10	96.13	88.31	104.64
14.20	96.84	88.97	105.42
14.30	97.56	89.63	106.20
14.40	98.28	90.29	106.98
14.50	99.00	90.95	107.77
14.60	99.72	91.61	108.55
14.70	100.44	92.27	109.33
14.80	101.16	92.93	110.12
14.90	101.88	93.59	110.90
15.00	102.60	94.25	111.69
15.10	103.32	94.92	112.47
15.20	104.04	95.58	113.26
15.30	104.76	96.24	114.04
15.40	105.48	96.90	114.83
15.50	106.21	97.56	115.61
15.60	106.93	98.23	116.40
15.70	107.65	98.89	117.19
15.80	108.37	99.55	117.97
15.90	109.09	100.22	118.76
16.00	109.82	100.88	119.55
16.10	110.54	101.54	120.33
16.20	111.26	102.21	121.12
16.30	111.99	102.87	121.91
16.40	112.71	103.54	122.70
16.50	113.44	104.20	123.49
16.60	114.16	104.87	124.28
16.70	114.88	105.53	125.06
16.80	115.61	106.20	125.85
16.90	116.33	106.86	126.64
17.00	117.06	107.53	127.43
17.10	117.78	108.19	128.22
17.20	118.51	108.86	129.01
17.30	119.24	109.53	129.80
17.40	119.96	110.19	130.60
17.50	120.69	110.86	131.39
17.60	121.41	111.53	132.18
17.70	122.14	112.19	132.97
17.80	122.87	112.86	133.76
17.90	123.60	113.53	134.55
18.00	124.32	114.20	135.35
18.10	125.05	114.87	136.14
18.20	125.78	115.53	136.93
18.30	126.51	116.20	137.73
18.40	127.23	116.87	138.52
18.50	127.96	117.54	139.31
18.60	128.69	118.21	140.11
18.70	129.42	118.88	140.90
18.80	130.15	119.55	141.69
18.90	130.88	120.22	142.49
19.00	131.61	120.89	143.28
19.10	132.34	121.55	144.08
19.20	133.07	122.22	144.87
19.30	133.80	122.90	145.67
19.40	134.53	123.57	146.46
19.50	135.26	124.24	147.26
19.60	135.99	124.91	148.06
19.70	136.72	125.58	148.85
19.80	137.45	126.25	149.65
19.90	138.18	126.92	150.45
20.00	138.91	127.59	151.24
20.10	139.65	128.26	152.04
20.20	140.38	128.93	152.84
20.30	141.11	129.61	153.64
20.40	141.84	130.28	154.43
20.50	142.58	130.95	155.23
20.60	143.31	131.62	156.03
20.70	144.04	132.30	156.83
20.80	144.77	132.97	157.63
20.90	145.51	133.64	158.43
21.00	146.24	134.31	159.23
21.10	146.97	134.99	160.03
21.20	147.71	135.66	160.82
21.30	148.44	136.33	161.62
21.40	149.18	137.01	162.42
21.50	149.91	137.68	163.22
21.60	150.64	138.36	164.03
21.70	151.38	139.03	164.83
21.80	152.11	139.70	165.63
21.90	152.85	140.38	166.43
22.00	153.58	141.05	167.23
22.10	154.32	141.73	168.03
22.20	155.06	142.40	168.83
22.30	155.79	143.08	169.63
22.40	156.53	143.75	170.44
22.50	157.26	144.43	171.24
22.60	158.00	145.11	172.04
22.70	158.74	145.78	172.84
22.80	159.47	146.46	173.65
22.90	160.21	147.13	174.45
23.00	160.95	147.81	175.25
23.10	161.68	148.49	176.06
23.20	162.42	149.16	176.86
23.30	163.16	149.84	177.66
23.40	163.90	150.52	178.47
23.50	164.63	151.19	179.27
23.60	165.37	151.87	180.08
23.70	166.11	152.55	180.88
23.80	166.85	153.22	181.68
23.90	167.59	153.90	182.49
24.00	168.33	154.58	183.29
24.10	169.07	155.26	184.10
24.20	169.80	155.94	184.91
24.30	170.54	156.61	185.71
24.40	171.28	157.29	186.52
24.50	172.02	157.97	187.32
24.60	172.76	158.65	188.13
24.70	173.50	159.33	188.94
24.80	174.24	160.01	189.74
24.90	174.98	160.69	190.55
25.00	175.72	161.37	191.36
25.10	176.46	162.04	192.16
25.20	177.20	162.72	192.97
25.30	177.94	163.40	193.78
25.40	178.68	164.08	194.58
25.50	179.43	164.76	195.39
25.60	180.17	165.44	196.20
25.70	180.91	166.12	197.01
25.80	181.65	166.80	197.82
25.90	182.39	167.48	198.63
26.00	183.13	168.16	199.43
26.10	183.88	168.85	200.24
26.20	184.62	169.53	201.05
26.30	185.36	170.21	201.86
26.40	186.10	170.89	202.67
26.50	186.84	171.57	203.48
26.60	187.59	172.25	204.29
26.70	188.33	172.93	205.10
26.80	189.07	173.61	205.91
26.90	189.82	174.30	206.72
27.00	190.56	174.98	207.53
27.10	191.30	175.66	208.34
27.20	192.05	176.34	209.15
27.30	192.79	177.02	209.96
27.40	193.53	177.71	210.77
27.50	194.28	178.39	211.58
27.60	195.02	179.07	212.40
27.70	195.77	179.75	213.21
27.80	196.51	180.44	214.02
27.90	197.26	181.12	214.83
28.00	198.00	181.80	215.64
28.10	198.75	182.49	216.45
28.20	199.49	183.17	217.27
28.30	200.24	183.85	218.08
28.40	200.98	184.54	218.89
28.50	201.73	185.22	219.71
28.60	202.47	185.90	220.52
28.70	203.22	186.59	221.33
28.80	203.96	187.27	222.14
28.90	204.71	187.96	222.96
29.00	205.46	188.64	223.77
29.10	206.20	189.33	224.59
29.20	206.95	190.01	225.40
29.30	207.70	190.69	226.21
29.40	208.44	191.38	227.03
29.50	209.19	192.06	227.84
29.60	209.94	192.75	228.66
29.70	210.68	193.43	229.47
29.80	211.43	194.12	230.29
29.90	212.18	194.81	231.10
30.00	212.93	195.49	231.92
30.10	213.67	196.18	232.73
30.20	214.42	196.86	233.55
30.30	215.17	197.55	234.36
30.40	215.92	198.23	235.18
30.50	216.67	198.92	235.99
30.60	217.41	199.61	236.81
30.70	218.16	200.29	237.63
30.80	218.91	200.98	238.44
30.90	219.66	201.67	239.26
31.00	220.41	202.35	240.07
31.10	221.16	203.04	240.89
31.20	221.91	203.73	241.71
31.30	222.66	204.41	242.53
31.40	223.41	205.10	243.34
31.50	224.15	205.79	244.16
31.60	224.90	206.48	244.98
31.70	225.65	207.16	245.80
31.80	226.40	207.85	246.61
31.90	227.15	208.54	247.43
32.00	227.90	209.23	248.25
32.10	228.65	209.91	249.07
32.20	229.40	210.60	249.89
32.30	230.15	211.29	250.70
32.40	230.91	211.98	251.52
32.50	231.66	212.67	252.34
32.60	232.41	213.36	253.16
32.70	233.16	214.04	253.98
32.80	233.91	214.73	254.80
32.90	234.66	215.42	255.62
33.00	235.41	216.11	256.44
33.10	236.16	216.80	257.26
33.20	236.91	217.49	258.08
33.30	237.67	218.18	258.90
33.40	238.42	218.87	259.72
33.50	239.17	219.56	260.54
33.60	239.92	220.25	261.36
33.70	240.67	220.94	262.18
33.80	241.43	221.63	263.00
33.90	242.18	222.32	263.82
34.00	242.93	223.01	264.64
34.10	243.68	223.70	265.46
34.20	244.44	224.39	266.28
34.30	245.19	225.08	267.10
34.40	245.94	225.77	267.92
34.50	246.70	226.46	268.74
34.60	247.45	227.15	269.57
34.70	248.20	227.84	270.39
34.80	248.96	228.53	271.21
34.90	249.71	229.22	272.03
35.00	250.46	229.91	272.85
35.10	251.22	230.60	273.68
35.20	251.97	231.29	274.50
35.30	252.73	231.98	275.32
35.40	253.48	232.68	276.14
35.50	254.23	233.37	276.97
35.60	254.99	234.06	277.79
35.70	255.74	234.75	278.61
35.80	256.50	235.44	279.44
35.90	257.25	236.13	280.26
36.00	258.01	236.83	281.08
36.10	258.76	237.52	281.91
36.20	259.52	238.21	282.73
36.30	260.27	238.90	283.55
36.40	261.03	239.60	284.38
36.50	261.78	240.29	285.20
36.60	262.54	240.98	286.03
36.70	263.29	241.67	286.85
36.80	264.05	242.37	287.67
36.90	264.81	243.06	288.50
37.00	265.56	243.75	289.32
37.10	266.32	244.44	290.15
37.20	267.07	245.14	290.97
37.30	267.83	245.83	291.80
37.40	268.59	246.52	292.62
37.50	269.34	247.22	293.45
37.60	270.10	247.91	294.27
37.70	270.86	248.60	295.10
37.80	271.61	249.30	295.93
37.90	272.37	249.99	296.75
38.00	273.13	250.69	297.58
38.10	273.88	251.38	298.40
38.20	274.64	252.07	299.23
38.30	275.40	252.77	300.06
38.40	276.16	253.46	300.88
38.50	276.91	254.16	301.71
38.60	277.67	254.85	302.53
38.70	278.43	255.55	303.36
38.80	279.19	256.24	304.19
38.90	279.94	256.94	305.02
39.00	280.70	257.63	305.84
39.10	281.46	258.33	306.67
39.20	282.22	259.02	307.50
39.30	282.98	259.72	308.32
39.40	283.74	260.41	309.15
39.50	284.49	261.11	309.98
39.60	285.25	261.80	310.81
39.70	286.01	262.50	311.64
39.80	286.77	263.19	312.46
39.90	287.53	263.89	313.29
40.00	288.29	264.58	314.12
40.10	289.05	265.28	314.95
40.20	289.81	265.98	315.78
40.30	290.57	266.67	316.60
40.40	291.33	267.37	317.43
40.50	292.09	268.06	318.26
40.60	292.85	268.76	319.09
40.70	293.61	269.46	319.92
40.80	294.37	270.15	320.75
40.90	295.13	270.85	321.58
41.00	295.89	271.55	322.41
41.10	296.65	272.24	323.24
41.20	297.41	272.94	324.07
41.30	298.17	273.64	324.90
41.40	298.93	274.33	325.73
41.50	299.69	275.03	326.56
41.60	300.45	275.73	327.39
41.70	301.21	276.42	328.22
41.80	301.97	277.12	329.05
41.90	302.73	277.82	329.88
42.00	303.49	278.52	330.71
42.10	304.25	279.21	331.54
42.20	305.01	279.91	332.37
42.30	305.78	280.61	333.20
42.40	306.54	281.31	334.03
42.50	307.30	282.00	334.86
42.60	308.06	282.70	335.69
42.70	308.82	283.40	336.53
42.80	309.58	284.10	337.36
42.90	310.35	284.80	338.19
43.00	311.11	285.50	339.02
43.10	311.87	286.19	339.85
43.20	312.63	286.89	340.68
43.30	313.40	287.59	341.52
43.40	314.16	288.29	342.35
43.50	314.92	288.99	343.18
43.60	315.68	289.69	344.01
43.70	316.45	290.39	344.84
43.80	317.21	291.08	345.68
43.90	317.97	291.78	346.51
44.00	318.73	292.48	347.34
44.10	319.50	293.18	348.17
44.20	320.26	293.88	349.01
44.30	321.02	294.58	349.84
44.40	321.79	295.28	350.67
44.50	322.55	295.98	351.51
44.60	323.31	296.68	352.34
44.70	324.08	297.38	353.17
44.80	324.84	298.08	354.01
44.90	325.60	298.78	354.84
45.00	326.37	299.48	355.67
45.10	327.13	300.18	356.51
45.20	327.90	300.88	357.34
45.30	328.66	301.58	358.18
45.40	329.43	302.28	359.01
45.50	330.19	302.98	359.84
45.60	330.95	303.68	360.68
45.70	331.72	304.38	361.51
45.80	332.48	305.08	362.35
45.90	333.25	305.78	363.18
46.00	334.01	306.48	364.02
46.10	334.78	307.18	364.85
46.20	335.54	307.88	365.69
46.30	336.31	308.58	366.52
46.40	337.07	309.28	367.36
46.50	337.84	309.99	368.19
46.60	338.60	310.69	369.03
46.70	339.37	311.39	369.86
46.80	340.13	312.09	370.70
46.90	340.90	312.79	371.53
47.00	341.67	313.49	372.37
47.10	342.43	314.19	373.21
47.20	343.20	314.90	374.04
47.30	343.96	315.60	374.88
47.40	344.73	316.30	375.71
47.50	345.49	317.00	376.55
47.60	346.26	317.70	377.39
47.70	347.03	318.40	378.22
47.80	347.79	319.11	379.06
47.90	348.56	319.81	379.90
48.00	349.33	320.51	380.73
48.10	350.09	321.21	381.57
48.20	350.86	321.92	382.41
48.30	351.63	322.62	383.24
48.40	352.39	323.32	384.08
48.50	353.16	324.02	384.92
48.60	353.93	324.73	385.76
48.70	354.69	325.43	386.59
48.80	355.46	326.13	387.43
48.90	356.23	326.83	388.27
49.00	357.00	327.54	389.11
49.10	357.76	328.24	389.94
49.20	358.53	328.94	390.78
49.30	359.30	329.65	391.62
49.40	360.07	330.35	392.46
49.50	360.83	331.05	393.30
49.60	361.60	331.76	394.13
49.70	362.37	332.46	394.97
49.80	363.14	333.16	395.81
49.90	363.91	333.87	396.65
50.00	364.67	334.57	397.49
50.10	365.44	335.27	398.33
50.20	366.21	335.98	399.17
50.30	366.98	336.68	400.00
50.40	367.75	337.39	400.84
50.50	368.52	338.09	401.68
50.60	369.29	338.79	402.52
50.70	370.05	339.50	403.36
50.80	370.82	340.20	404.20
50.90	371.59	340.91	405.04
51.00	372.36	341.61	405.88
51.10	373.13	342.32	406.72
51.20	373.90	343.02	407.56
51.30	374.67	343.72	408.40
51.40	375.44	344.43	409.24
51.50	376.21	345.13	410.08
51.60	376.98	345.84	410.92
51.70	377.75	346.54	411.76
51.80	378.52	347.25	412.60
51.90	379.29	347.95	413.44
52.00	380.06	348.66	414.28
52.10	380.83	349.36	415.12
52.20	381.60	350.07	415.96
52.30	382.37	350.77	416.80
52.40	383.14	351.48	417.64
52.50	383.91	352.18	418.48
52.60	384.68	352.89	419.32
52.70	385.45	353.60	420.17
52.80	386.22	354.30	421.01
52.90	386.99	355.01	421.85
53.00	387.76	355.71	422.69
53.10	388.53	356.42	423.53
53.20	389.30	357.12	424.37
53.30	390.07	357.83	425.21
53.40	390.84	358.54	426.06
53.50	391.61	359.24	426.90
53.60	392.38	359.95	427.74
53.70	393.15	360.66	428.58
53.80	393.93	361.36	429.42
53.90	394.70	362.07	430.27
54.00	395.47	362.77	431.11
54.10	396.24	363.48	431.95
54.20	397.01	364.19	432.79
54.30	397.78	364.89	433.64
54.40	398.55	365.60	434.48
54.50	399.33	366.31	435.32
54.60	400.10	367.01	436.16
54.70	400.87	367.72	437.01
54.80	401.64	368.43	437.85
54.90	402.41	369.13	438.69
55.00	403.19	369.84	439.54
55.10	403.96	370.55	440.38
55.20	404.73	371.26	441.22
55.30	405.50	371.96	442.07
55.40	406.27	372.67	442.91
55.50	407.05	373.38	443.75
55.60	407.82	374.09	444.60
55.70	408.59	374.79	445.44
55.80	409.37	375.50	446.28
55.90	410.14	376.21	447.13
56.00	410.91	376.92	447.97
56.10	411.68	377.62	448.82
56.20	412.46	378.33	449.66
56.30	413.23	379.04	450.50
56.40	414.00	379.75	451.35
56.50	414.78	380.46	452.19
56.60	415.55	381.16	453.04
56.70	416.32	381.87	453.88
56.80	417.10	382.58	454.73
56.90	417.87	383.29	455.57
57.00	418.64	384.00	456.42
57.10	419.42	384.71	457.26
57.20	420.19	385.41	458.11
57.30	420.96	386.12	458.95
57.40	421.74	386.83	459.80
57.50	422.51	387.54	460.64
57.60	423.29	388.25	461.49
57.70	424.06	388.96	462.33
57.80	424.83	389.67	463.18
57.90	425.61	390.38	464.02
58.00	426.38	391.08	464.87
58.10	427.16	391.79	465.71
58.20	427.93	392.50	466.56
58.30	428.71	393.21	467.41
58.40	429.48	393.92	468.25
58.50	430.26	394.63	469.10
58.60	431.03	395.34	469.94
58.70	431.81	396.05	470.79
58.80	432.58	396.76	471.64
58.90	433.36	397.47	472.48
59.00	434.13	398.18	473.33
59.10	434.91	398.89	474.18
59.20	435.68	399.60	475.02
59.30	436.46	400.31	475.87
59.40	437.23	401.02	476.72
59.50	438.01	401.73	477.56
59.60	438.78	402.44	478.41
59.70	439.56	403.15	479.26
59.80	440.33	403.86	480.10
59.90	441.11	404.57	480.95
60.00	441.88	405.28	481.80
60.10	442.66	405.99	482.65
60.20	443.44	406.70	483.49
60.30	444.21	407.41	484.34
60.40	444.99	408.12	485.19
60.50	445.76	408.83	486.04
60.60	446.54	409.54	486.88
60.70	447.32	410.25	487.73
60.80	448.09	410.96	488.58
60.90	448.87	411.67	489.43
61.00	449.65	412.38	490.28
61.10	450.42	413.09	491.12
61.20	451.20	413.80	491.97
61.30	451.97	414.51	492.82
61.40	452.75	415.23	493.67
61.50	453.53	415.94	494.52
61.60	454.30	416.65	495.37
61.70	455.08	417.36	496.21
61.80	455.86	418.07	497.06
61.90	456.64	418.78	497.91
62.00	457.41	419.49	498.76
62.10	458.19	420.20	499.61
62.20	458.97	420.92	500.46
62.30	459.74	421.63	501.31
62.40	460.52	422.34	502.16
62.50	461.30	423.05	503.01
62.60	462.08	423.76	503.85
62.70	462.85	424.47	504.70
62.80	463.63	425.19	505.55
62.90	464.41	425.90	506.40
63.00	465.19	426.61	507.25
63.10	465.96	427.32	508.10
63.20	466.74	428.03	508.95
63.30	467.52	428.75	509.80
63.40	468.30	429.46	510.65
63.50	469.08	430.17	511.50
63.60	469.85	430.88	512.35
63.70	470.63	431.60	513.20
63.80	471.41	432.31	514.05
63.90	472.19	433.02	514.90
64.00	472.97	433.73	515.75
64.10	473.75	434.45	516.60
64.20	474.52	435.16	517.45
64.30	475.30	435.87	518.30
64.40	476.08	436.58	519.15
64.50	476.86	437.30	520.01
64.60	477.64	438.01	520.86
64.70	478.42	438.72	521.71
64.80	479.20	439.43	522.56
64.90	479.98	440.15	523.41
65.00	480.76	440.86	524.26
65.10	481.53	441.57	525.11
65.20	482.31	442.29	525.96
65.30	483.09	443.00	526.81
65.40	483.87	443.71	527.66
65.50	484.65	444.43	528.52
65.60	485.43	445.14	529.37
65.70	486.21	445.85	530.22
65.80	486.99	446.57	531.07
65.90	487.77	447.28	531.92
66.00	488.55	447.99	532.77
66.10	489.33	448.71	533.63
66.20	490.11	449.42	534.48
66.30	490.89	450.14	535.33
66.40	491.67	450.85	536.18
66.50	492.45	451.56	537.03
66.60	493.23	452.28	537.89
66.70	494.01	452.99	538.74
66.80	494.79	453.71	539.59
66.90	495.57	454.42	540.44
67.00	496.35	455.13	541.30
67.10	497.13	455.85	542.15
67.20	497.91	456.56	543.00
67.30	498.69	457.28	543.85
67.40	499.47	457.99	544.71
67.50	500.25	458.71	545.56
67.60	501.03	459.42	546.41
67.70	501.81	460.13	547.27
67.80	502.59	460.85	548.12
67.90	503.37	461.56	548.97
68.00	504.16	462.28	549.83
68.10	504.94	462.99	550.68
68.20	505.72	463.71	551.53
68.30	506.50	464.42	552.39
68.40	507.28	465.14	553.24
68.50	508.06	465.85	554.09
68.60	508.84	466.57	554.95
68.70	509.62	467.28	555.80
68.80	510.40	468.00	556.65
68.90	511.19	468.71	557.51
69.00	511.97	469.43	558.36
69.10	512.75	470.14	559.22
69.20	513.53	470.86	560.07
69.30	514.31	471.57	560.92
69.40	515.09	472.29	561.78
69.50	515.88	473.01	562.63
69.60	516.66	473.72	563.49
69.70	517.44	474.44	564.34
69.80	518.22	475.15	565.20
69.90	519.00	475.87	566.05
70.00	519.79	476.58	566.90
70.10	520.57	477.30	567.76
70.20	521.35	478.02	568.61
70.30	522.13	478.73	569.47
70.40	522.92	479.45	570.32
70.50	523.70	480.16	571.18
70.60	524.48	480.88	572.03
70.70	525.26	481.60	572.89
70.80	526.05	482.31	573.74
70.90	526.83	483.03	574.60
71.00	527.61	483.74	575.45
71.10	528.39	484.46	576.31
71.20	529.18	485.18	577.17
71.30	529.96	485.89	578.02
71.40	530.74	486.61	578.88
71.50	531.52	487.33	579.73
71.60	532.31	488.04	580.59
71.70	533.09	488.76	581.44
71.80	533.87	489.48	582.30
71.90	534.66	490.19	583.16
72.00	535.44	490.91	584.01
72.10	536.22	491.63	584.87
72.20	537.01	492.34	585.72
72.30	537.79	493.06	586.58
72.40	538.57	493.78	587.44
72.50	539.36	494.49	588.29
72.60	540.14	495.21	589.15
72.70	540.93	495.93	590.00
72.80	541.71	496.65	590.86
72.90	542.49	497.36	591.72
73.00	543.28	498.08	592.57
73.10	544.06	498.80	593.43
73.20	544.84	499.51	594.29
73.30	545.63	500.23	595.14
73.40	546.41	500.95	596.00
73.50	547.20	501.67	596.86
73.60	547.98	502.38	597.72
73.70	548.77	503.10	598.57
73.80	549.55	503.82	599.43
73.90	550.33	504.54	600.29
74.00	551.12	505.26	601.14
74.10	551.90	505.97	602.00
74.20	552.69	506.69	602.86
74.30	553.47	507.41	603.72
74.40	554.26	508.13	604.57
74.50	555.04	508.85	605.43
74.60	555.83	509.56	606.29
74.70	556.61	510.28	607.15
74.80	557.40	511.00	608.01
74.90	558.18	511.72	608.86
75.00	558.97	512.44	609.72
75.10	559.75	513.15	610.58
75.20	560.54	513.87	611.44
75.30	561.32	514.59	612.30
75.40	562.11	515.31	613.15
75.50	562.89	516.03	614.01
75.60	563.68	516.75	614.87
75.70	564.46	517.47	615.73
75.80	565.25	518.18	616.59
75.90	566.03	518.90	617.45
76.00	566.82	519.62	618.30
76.10	567.60	520.34	619.16
76.20	568.39	521.06	620.02
76.30	569.18	521.78	620.88
76.40	569.96	522.50	621.74
76.50	570.75	523.22	622.60
76.60	571.53	523.93	623.46
76.70	572.32	524.65	624.32
76.80	573.11	525.37	625.17
76.90	573.89	526.09	626.03
77.00	574.68	526.81	626.89
77.10	575.46	527.53	627.75
77.20	576.25	528.25	628.61
77.30	577.04	528.97	629.47
77.40	577.82	529.69	630.33
77.50	578.61	530.41	631.19
77.60	579.40	531.13	632.05
77.70	580.18	531.85	632.91
77.80	580.97	532.57	633.77
77.90	581.75	533.29	634.63
78.00	582.54	534.01	635.49
78.10	583.33	534.73	636.35
78.20	584.12	535.45	637.21
78.30	584.90	536.16	638.07
78.40	585.69	536.88	638.93
78.50	586.48	537.60	639.79
78.60	587.26	538.32	640.65
78.70	588.05	539.04	641.51
78.80	588.84	539.76	642.37
78.90	589.62	540.48	643.23
79.00	590.41	541.20	644.09
79.10	591.20	541.93	644.95
79.20	591.99	542.65	645.81
79.30	592.77	543.37	646.67
79.40	593.56	544.09	647.53
79.50	594.35	544.81	648.39
79.60	595.14	545.53	649.25
79.70	595.92	546.25	650.12
79.80	596.71	546.97	650.98
79.90	597.50	547.69	651.84
80.00	598.29	548.41	652.70
80.10	599.07	549.13	653.56
80.20	599.86	549.85	654.42
80.30	600.65	550.57	655.28
80.40	601.44	551.29	656.14
80.50	602.22	552.01	657.00
80.60	603.01	552.73	657.87
80.70	603.80	553.45	658.73
80.80	604.59	554.18	659.59
80.90	605.38	554.90	660.45
81.00	606.17	555.62	661.31
81.10	606.95	556.34	662.17
81.20	607.74	557.06	663.04
81.30	608.53	557.78	663.90
81.40	609.32	558.50	664.76
81.50	610.11	559.22	665.62
81.60	610.90	559.94	666.48
81.70	611.68	560.67	667.35
81.80	612.47	561.39	668.21
81.90	613.26	562.11	669.07
82.00	614.05	562.83	669.93
82.10	614.84	563.55	670.79
82.20	615.63	564.27	671.66
82.30	616.42	564.99	672.52
82.40	617.21	565.72	673.38
82.50	618.00	566.44	674.24
