# Supplementary material
Source: MDPI journal article supplement (https://www.mdpi.com/2504-446X/8/3/115)
Supplement: s1 [file s1 › Table S10 Crocodylus rhombifer Framework.csv]

Head Length (cm)	Fit (estimation) (cm)	Lower limit (95% confidence interval) (cm)	Upper limit (95% confidence interval) (cm)
2.70	20.29	18.18	22.65
2.80	21.02	18.84	23.46
2.90	21.75	19.50	24.26
3.00	22.48	20.15	25.07
3.10	23.20	20.81	25.87
3.20	23.93	21.46	26.68
3.30	24.65	22.12	27.48
3.40	25.38	22.77	28.28
3.50	26.10	23.42	29.08
3.60	26.82	24.08	29.88
3.70	27.55	24.73	30.68
3.80	28.27	25.38	31.48
3.90	28.99	26.03	32.28
4.00	29.71	26.68	33.08
4.10	30.43	27.33	33.88
4.20	31.15	27.98	34.67
4.30	31.87	28.63	35.47
4.40	32.59	29.28	36.26
4.50	33.30	29.93	37.06
4.60	34.02	30.58	37.85
4.70	34.74	31.23	38.64
4.80	35.45	31.88	39.44
4.90	36.17	32.52	40.23
5.00	36.89	33.17	41.02
5.10	37.60	33.82	41.81
5.20	38.32	34.46	42.60
5.30	39.03	35.11	43.39
5.40	39.75	35.75	44.18
5.50	40.46	36.40	44.97
5.60	41.17	37.04	45.76
5.70	41.88	37.69	46.55
5.80	42.60	38.33	47.34
5.90	43.31	38.97	48.13
6.00	44.02	39.62	48.91
6.10	44.73	40.26	49.70
6.20	45.44	40.90	50.49
6.30	46.15	41.55	51.27
6.40	46.86	42.19	52.06
6.50	47.57	42.83	52.84
6.60	48.28	43.47	53.63
6.70	48.99	44.11	54.41
6.80	49.70	44.75	55.20
6.90	50.41	45.39	55.98
7.00	51.12	46.04	56.76
7.10	51.83	46.68	57.55
7.20	52.53	47.32	58.33
7.30	53.24	47.96	59.11
7.40	53.95	48.59	59.89
7.50	54.66	49.23	60.67
7.60	55.36	49.87	61.46
7.70	56.07	50.51	62.24
7.80	56.77	51.15	63.02
7.90	57.48	51.79	63.80
8.00	58.19	52.43	64.58
8.10	58.89	53.06	65.36
8.20	59.60	53.70	66.14
8.30	60.30	54.34	66.92
8.40	61.00	54.98	67.70
8.50	61.71	55.61	68.47
8.60	62.41	56.25	69.25
8.70	63.12	56.88	70.03
8.80	63.82	57.52	70.81
8.90	64.52	58.16	71.59
9.00	65.23	58.79	72.36
9.10	65.93	59.43	73.14
9.20	66.63	60.06	73.92
9.30	67.33	60.70	74.69
9.40	68.04	61.33	75.47
9.50	68.74	61.97	76.25
9.60	69.44	62.60	77.02
9.70	70.14	63.24	77.80
9.80	70.84	63.87	78.57
9.90	71.54	64.50	79.35
10.00	72.24	65.14	80.12
10.10	72.94	65.77	80.90
10.20	73.64	66.40	81.67
10.30	74.34	67.04	82.45
10.40	75.04	67.67	83.22
10.50	75.74	68.30	83.99
10.60	76.44	68.93	84.77
10.70	77.14	69.57	85.54
10.80	77.84	70.20	86.31
10.90	78.54	70.83	87.09
11.00	79.24	71.46	87.86
11.10	79.94	72.09	88.63
11.20	80.64	72.73	89.41
11.30	81.33	73.36	90.18
11.40	82.03	73.99	90.95
11.50	82.73	74.62	91.72
11.60	83.43	75.25	92.49
11.70	84.12	75.88	93.26
11.80	84.82	76.51	94.03
11.90	85.52	77.14	94.81
12.00	86.21	77.77	95.58
12.10	86.91	78.40	96.35
12.20	87.61	79.03	97.12
12.30	88.30	79.66	97.89
12.40	89.00	80.29	98.66
12.50	89.70	80.92	99.43
12.60	90.39	81.55	100.20
12.70	91.09	82.18	100.97
12.80	91.78	82.80	101.74
12.90	92.48	83.43	102.50
13.00	93.17	84.06	103.27
13.10	93.87	84.69	104.04
13.20	94.56	85.32	104.81
13.30	95.26	85.95	105.58
13.40	95.95	86.57	106.35
13.50	96.65	87.20	107.12
13.60	97.34	87.83	107.88
13.70	98.04	88.46	108.65
13.80	98.73	89.08	109.42
13.90	99.42	89.71	110.19
14.00	100.12	90.34	110.95
14.10	100.81	90.96	111.72
14.20	101.50	91.59	112.49
14.30	102.20	92.22	113.26
14.40	102.89	92.84	114.02
14.50	103.58	93.47	114.79
14.60	104.27	94.10	115.55
14.70	104.97	94.72	116.32
14.80	105.66	95.35	117.09
14.90	106.35	95.97	117.85
15.00	107.04	96.60	118.62
15.10	107.74	97.22	119.38
15.20	108.43	97.85	120.15
15.30	109.12	98.47	120.92
15.40	109.81	99.10	121.68
15.50	110.50	99.72	122.45
15.60	111.19	100.35	123.21
15.70	111.88	100.97	123.98
15.80	112.58	101.60	124.74
15.90	113.27	102.22	125.50
16.00	113.96	102.85	126.27
16.10	114.65	103.47	127.03
16.20	115.34	104.09	127.80
16.30	116.03	104.72	128.56
16.40	116.72	105.34	129.33
16.50	117.41	105.97	130.09
16.60	118.10	106.59	130.85
16.70	118.79	107.21	131.62
16.80	119.48	107.84	132.38
16.90	120.17	108.46	133.14
17.00	120.86	109.08	133.91
17.10	121.55	109.70	134.67
17.20	122.24	110.33	135.43
17.30	122.93	110.95	136.19
17.40	123.61	111.57	136.96
17.50	124.30	112.19	137.72
17.60	124.99	112.82	138.48
17.70	125.68	113.44	139.24
17.80	126.37	114.06	140.01
17.90	127.06	114.68	140.77
18.00	127.75	115.30	141.53
18.10	128.43	115.93	142.29
18.20	129.12	116.55	143.05
18.30	129.81	117.17	143.82
18.40	130.50	117.79	144.58
18.50	131.19	118.41	145.34
18.60	131.87	119.03	146.10
18.70	132.56	119.65	146.86
18.80	133.25	120.28	147.62
18.90	133.94	120.90	148.38
19.00	134.62	121.52	149.14
19.10	135.31	122.14	149.90
19.20	136.00	122.76	150.66
19.30	136.68	123.38	151.42
19.40	137.37	124.00	152.18
19.50	138.06	124.62	152.95
19.60	138.74	125.24	153.71
19.70	139.43	125.86	154.47
19.80	140.12	126.48	155.23
19.90	140.80	127.10	155.98
20.00	141.49	127.72	156.74
20.10	142.17	128.34	157.50
20.20	142.86	128.96	158.26
20.30	143.55	129.58	159.02
20.40	144.23	130.20	159.78
20.50	144.92	130.81	160.54
20.60	145.60	131.43	161.30
20.70	146.29	132.05	162.06
20.80	146.97	132.67	162.82
20.90	147.66	133.29	163.58
21.00	148.34	133.91	164.34
21.10	149.03	134.53	165.09
21.20	149.71	135.15	165.85
21.30	150.40	135.76	166.61
21.40	151.08	136.38	167.37
21.50	151.77	137.00	168.13
21.60	152.45	137.62	168.89
21.70	153.14	138.24	169.64
21.80	153.82	138.85	170.40
21.90	154.51	139.47	171.16
22.00	155.19	140.09	171.92
22.10	155.87	140.71	172.68
22.20	156.56	141.32	173.43
22.30	157.24	141.94	174.19
22.40	157.93	142.56	174.95
22.50	158.61	143.18	175.70
22.60	159.29	143.79	176.46
22.70	159.98	144.41	177.22
22.80	160.66	145.03	177.98
22.90	161.34	145.64	178.73
23.00	162.03	146.26	179.49
23.10	162.71	146.88	180.25
23.20	163.39	147.49	181.00
23.30	164.07	148.11	181.76
23.40	164.76	148.73	182.52
23.50	165.44	149.34	183.27
23.60	166.12	149.96	184.03
23.70	166.81	150.58	184.78
23.80	167.49	151.19	185.54
23.90	168.17	151.81	186.30
24.00	168.85	152.42	187.05
24.10	169.54	153.04	187.81
24.20	170.22	153.66	188.56
24.30	170.90	154.27	189.32
24.40	171.58	154.89	190.08
24.50	172.26	155.50	190.83
24.60	172.95	156.12	191.59
24.70	173.63	156.73	192.34
24.80	174.31	157.35	193.10
24.90	174.99	157.96	193.85
25.00	175.67	158.58	194.61
25.10	176.35	159.19	195.36
25.20	177.03	159.81	196.12
25.30	177.72	160.42	196.87
25.40	178.40	161.04	197.63
25.50	179.08	161.65	198.38
25.60	179.76	162.27	199.14
25.70	180.44	162.88	199.89
25.80	181.12	163.49	200.65
25.90	181.80	164.11	201.40
26.00	182.48	164.72	202.16
26.10	183.16	165.34	202.91
26.20	183.84	165.95	203.66
26.30	184.52	166.56	204.42
26.40	185.20	167.18	205.17
26.50	185.88	167.79	205.93
26.60	186.56	168.41	206.68
26.70	187.24	169.02	207.43
26.80	187.92	169.63	208.19
26.90	188.60	170.25	208.94
27.00	189.28	170.86	209.69
27.10	189.96	171.47	210.45
27.20	190.64	172.09	211.20
27.30	191.32	172.70	211.95
27.40	192.00	173.31	212.71
27.50	192.68	173.93	213.46
27.60	193.36	174.54	214.21
27.70	194.04	175.15	214.97
27.80	194.72	175.76	215.72
27.90	195.40	176.38	216.47
28.00	196.08	176.99	217.23
28.10	196.76	177.60	217.98
28.20	197.44	178.21	218.73
28.30	198.12	178.83	219.48
28.40	198.79	179.44	220.24
28.50	199.47	180.05	220.99
28.60	200.15	180.66	221.74
28.70	200.83	181.28	222.49
28.80	201.51	181.89	223.25
28.90	202.19	182.50	224.00
29.00	202.87	183.11	224.75
29.10	203.54	183.72	225.50
29.20	204.22	184.34	226.26
29.30	204.90	184.95	227.01
29.40	205.58	185.56	227.76
29.50	206.26	186.17	228.51
29.60	206.94	186.78	229.26
29.70	207.61	187.39	230.01
29.80	208.29	188.00	230.77
29.90	208.97	188.62	231.52
30.00	209.65	189.23	232.27
30.10	210.32	189.84	233.02
30.20	211.00	190.45	233.77
30.30	211.68	191.06	234.52
30.40	212.36	191.67	235.28
30.50	213.03	192.28	236.03
30.60	213.71	192.89	236.78
30.70	214.39	193.50	237.53
30.80	215.07	194.11	238.28
30.90	215.74	194.72	239.03
31.00	216.42	195.33	239.78
31.10	217.10	195.95	240.53
31.20	217.77	196.56	241.28
31.30	218.45	197.17	242.03
31.40	219.13	197.78	242.78
31.50	219.80	198.39	243.54
31.60	220.48	199.00	244.29
31.70	221.16	199.61	245.04
31.80	221.83	200.22	245.79
31.90	222.51	200.83	246.54
32.00	223.19	201.44	247.29
32.10	223.86	202.05	248.04
32.20	224.54	202.66	248.79
32.30	225.22	203.26	249.54
32.40	225.89	203.87	250.29
32.50	226.57	204.48	251.04
32.60	227.24	205.09	251.79
32.70	227.92	205.70	252.54
32.80	228.60	206.31	253.29
32.90	229.27	206.92	254.04
33.00	229.95	207.53	254.79
33.10	230.62	208.14	255.54
33.20	231.30	208.75	256.29
33.30	231.97	209.36	257.04
33.40	232.65	209.97	257.78
33.50	233.33	210.57	258.53
33.60	234.00	211.18	259.28
33.70	234.68	211.79	260.03
33.80	235.35	212.40	260.78
33.90	236.03	213.01	261.53
34.00	236.70	213.62	262.28
34.10	237.38	214.23	263.03
34.20	238.05	214.83	263.78
34.30	238.73	215.44	264.53
34.40	239.40	216.05	265.28
34.50	240.08	216.66	266.02
34.60	240.75	217.27	266.77
34.70	241.43	217.88	267.52
34.80	242.10	218.48	268.27
34.90	242.78	219.09	269.02
35.00	243.45	219.70	269.77
35.10	244.12	220.31	270.52
35.20	244.80	220.92	271.27
35.30	245.47	221.52	272.01
35.40	246.15	222.13	272.76
35.50	246.82	222.74	273.51
35.60	247.50	223.35	274.26
35.70	248.17	223.95	275.01
35.80	248.84	224.56	275.75
35.90	249.52	225.17	276.50
36.00	250.19	225.78	277.25
36.10	250.87	226.38	278.00
36.20	251.54	226.99	278.75
36.30	252.21	227.60	279.49
36.40	252.89	228.20	280.24
36.50	253.56	228.81	280.99
36.60	254.24	229.42	281.74
36.70	254.91	230.02	282.49
36.80	255.58	230.63	283.23
36.90	256.26	231.24	283.98
37.00	256.93	231.84	284.73
37.10	257.60	232.45	285.48
37.20	258.28	233.06	286.22
37.30	258.95	233.66	286.97
37.40	259.62	234.27	287.72
37.50	260.30	234.88	288.46
37.60	260.97	235.48	289.21
37.70	261.64	236.09	289.96
37.80	262.31	236.70	290.71
37.90	262.99	237.30	291.45
38.00	263.66	237.91	292.20
38.10	264.33	238.51	292.95
38.20	265.01	239.12	293.69
38.30	265.68	239.73	294.44
38.40	266.35	240.33	295.19
38.50	267.02	240.94	295.93
38.60	267.70	241.54	296.68
38.70	268.37	242.15	297.43
38.80	269.04	242.76	298.17
38.90	269.71	243.36	298.92
39.00	270.39	243.97	299.67
39.10	271.06	244.57	300.41
39.20	271.73	245.18	301.16
39.30	272.40	245.78	301.91
39.40	273.08	246.39	302.65
39.50	273.75	246.99	303.40
39.60	274.42	247.60	304.15
39.70	275.09	248.20	304.89
39.80	275.76	248.81	305.64
39.90	276.44	249.41	306.38
40.00	277.11	250.02	307.13
40.10	277.78	250.62	307.88
40.20	278.45	251.23	308.62
40.30	279.12	251.83	309.37
40.40	279.79	252.44	310.11
40.50	280.47	253.04	310.86
40.60	281.14	253.65	311.61
40.70	281.81	254.25	312.35
40.80	282.48	254.86	313.10
40.90	283.15	255.46	313.84
41.00	283.82	256.07	314.59
41.10	284.49	256.67	315.33
41.20	285.17	257.28	316.08
41.30	285.84	257.88	316.82
41.40	286.51	258.48	317.57
41.50	287.18	259.09	318.32
41.60	287.85	259.69	319.06
41.70	288.52	260.30	319.81
41.80	289.19	260.90	320.55
41.90	289.86	261.50	321.30
42.00	290.53	262.11	322.04
42.10	291.20	262.71	322.79
42.20	291.88	263.32	323.53
42.30	292.55	263.92	324.28
42.40	293.22	264.52	325.02
42.50	293.89	265.13	325.77
42.60	294.56	265.73	326.51
42.70	295.23	266.34	327.26
42.80	295.90	266.94	328.00
42.90	296.57	267.54	328.75
43.00	297.24	268.15	329.49
43.10	297.91	268.75	330.23
43.20	298.58	269.35	330.98
43.30	299.25	269.96	331.72
43.40	299.92	270.56	332.47
43.50	300.59	271.16	333.21
43.60	301.26	271.77	333.96
43.70	301.93	272.37	334.70
43.80	302.60	272.97	335.45
43.90	303.27	273.57	336.19
44.00	303.94	274.18	336.93
44.10	304.61	274.78	337.68
44.20	305.28	275.38	338.42
44.30	305.95	275.99	339.17
44.40	306.62	276.59	339.91
44.50	307.29	277.19	340.66
44.60	307.96	277.79	341.40
44.70	308.63	278.40	342.14
44.80	309.30	279.00	342.89
44.90	309.97	279.60	343.63
45.00	310.64	280.20	344.38
45.10	311.31	280.81	345.12
45.20	311.98	281.41	345.86
45.30	312.65	282.01	346.61
45.40	313.31	282.61	347.35
45.50	313.98	283.22	348.09
45.60	314.65	283.82	348.84
45.70	315.32	284.42	349.58
45.80	315.99	285.02	350.32
45.90	316.66	285.63	351.07
46.00	317.33	286.23	351.81
46.10	318.00	286.83	352.55
46.20	318.67	287.43	353.30
46.30	319.34	288.03	354.04
46.40	320.00	288.63	354.78
46.50	320.67	289.24	355.53
46.60	321.34	289.84	356.27
46.70	322.01	290.44	357.01
46.80	322.68	291.04	357.76
46.90	323.35	291.64	358.50
47.00	324.02	292.24	359.24
47.10	324.69	292.85	359.99
47.20	325.35	293.45	360.73
47.30	326.02	294.05	361.47
47.40	326.69	294.65	362.22
47.50	327.36	295.25	362.96
47.60	328.03	295.85	363.70
47.70	328.70	296.45	364.44
47.80	329.36	297.06	365.19
47.90	330.03	297.66	365.93
48.00	330.70	298.26	366.67
48.10	331.37	298.86	367.41
48.20	332.04	299.46	368.16
48.30	332.70	300.06	368.90
48.40	333.37	300.66	369.64
48.50	334.04	301.26	370.39
48.60	334.71	301.86	371.13
48.70	335.38	302.46	371.87
48.80	336.04	303.06	372.61
48.90	336.71	303.67	373.35
49.00	337.38	304.27	374.10
49.10	338.05	304.87	374.84
49.20	338.71	305.47	375.58
49.30	339.38	306.07	376.32
49.40	340.05	306.67	377.07
49.50	340.72	307.27	377.81
49.60	341.39	307.87	378.55
49.70	342.05	308.47	379.29
49.80	342.72	309.07	380.03
49.90	343.39	309.67	380.78
50.00	344.05	310.27	381.52
50.10	344.72	310.87	382.26
50.20	345.39	311.47	383.00
50.30	346.06	312.07	383.74
50.40	346.72	312.67	384.49
50.50	347.39	313.27	385.23
50.60	348.06	313.87	385.97
50.70	348.72	314.47	386.71
50.80	349.39	315.07	387.45
50.90	350.06	315.67	388.19
51.00	350.73	316.27	388.94
51.10	351.39	316.87	389.68
51.20	352.06	317.47	390.42
51.30	352.73	318.07	391.16
51.40	353.39	318.67	391.90
51.50	354.06	319.27	392.64
51.60	354.73	319.87	393.38
51.70	355.39	320.47	394.13
51.80	356.06	321.07	394.87
51.90	356.73	321.67	395.61
52.00	357.39	322.26	396.35
52.10	358.06	322.86	397.09
52.20	358.73	323.46	397.83
52.30	359.39	324.06	398.57
52.40	360.06	324.66	399.31
52.50	360.72	325.26	400.06
52.60	361.39	325.86	400.80
52.70	362.06	326.46	401.54
52.80	362.72	327.06	402.28
52.90	363.39	327.66	403.02
53.00	364.06	328.26	403.76
53.10	364.72	328.85	404.50
53.20	365.39	329.45	405.24
53.30	366.05	330.05	405.98
53.40	366.72	330.65	406.72
53.50	367.39	331.25	407.46
53.60	368.05	331.85	408.20
53.70	368.72	332.45	408.95
53.80	369.38	333.05	409.69
53.90	370.05	333.64	410.43
54.00	370.72	334.24	411.17
54.10	371.38	334.84	411.91
54.20	372.05	335.44	412.65
54.30	372.71	336.04	413.39
54.40	373.38	336.64	414.13
54.50	374.04	337.24	414.87
54.60	374.71	337.83	415.61
54.70	375.37	338.43	416.35
54.80	376.04	339.03	417.09
54.90	376.71	339.63	417.83
55.00	377.37	340.23	418.57
55.10	378.04	340.82	419.31
55.20	378.70	341.42	420.05
55.30	379.37	342.02	420.79
55.40	380.03	342.62	421.53
55.50	380.70	343.22	422.27
55.60	381.36	343.81	423.01
55.70	382.03	344.41	423.75
55.80	382.69	345.01	424.49
55.90	383.36	345.61	425.23
56.00	384.02	346.21	425.97
56.10	384.69	346.80	426.71
56.20	385.35	347.40	427.45
56.30	386.02	348.00	428.19
56.40	386.68	348.60	428.93
56.50	387.35	349.19	429.67
56.60	388.01	349.79	430.41
56.70	388.68	350.39	431.15
56.80	389.34	350.99	431.89
56.90	390.01	351.58	432.63
57.00	390.67	352.18	433.37
57.10	391.34	352.78	434.11
57.20	392.00	353.37	434.85
57.30	392.66	353.97	435.59
57.40	393.33	354.57	436.33
57.50	393.99	355.17	437.07
57.60	394.66	355.76	437.81
57.70	395.32	356.36	438.54
57.80	395.99	356.96	439.28
57.90	396.65	357.55	440.02
58.00	397.32	358.15	440.76
58.10	397.98	358.75	441.50
58.20	398.64	359.35	442.24
58.30	399.31	359.94	442.98
58.40	399.97	360.54	443.72
58.50	400.64	361.14	444.46
58.60	401.30	361.73	445.20
58.70	401.97	362.33	445.94
58.80	402.63	362.93	446.68
58.90	403.29	363.52	447.42
59.00	403.96	364.12	448.15
59.10	404.62	364.72	448.89
59.20	405.29	365.31	449.63
59.30	405.95	365.91	450.37
59.40	406.61	366.51	451.11
59.50	407.28	367.10	451.85
59.60	407.94	367.70	452.59
59.70	408.60	368.29	453.33
59.80	409.27	368.89	454.06
59.90	409.93	369.49	454.80
60.00	410.60	370.08	455.54
60.10	411.26	370.68	456.28
60.20	411.92	371.28	457.02
60.30	412.59	371.87	457.76
60.40	413.25	372.47	458.50
60.50	413.91	373.06	459.24
60.60	414.58	373.66	459.97
60.70	415.24	374.26	460.71
60.80	415.90	374.85	461.45
60.90	416.57	375.45	462.19
61.00	417.23	376.04	462.93
61.10	417.89	376.64	463.67
61.20	418.56	377.23	464.40
61.30	419.22	377.83	465.14
61.40	419.88	378.43	465.88
61.50	420.55	379.02	466.62
61.60	421.21	379.62	467.36
61.70	421.87	380.21	468.10
61.80	422.54	380.81	468.83
61.90	423.20	381.40	469.57
62.00	423.86	382.00	470.31
62.10	424.52	382.60	471.05
62.20	425.19	383.19	471.79
62.30	425.85	383.79	472.52
62.40	426.51	384.38	473.26
62.50	427.18	384.98	474.00
62.60	427.84	385.57	474.74
62.70	428.50	386.17	475.48
62.80	429.16	386.76	476.21
62.90	429.83	387.36	476.95
63.00	430.49	387.95	477.69
63.10	431.15	388.55	478.43
63.20	431.81	389.14	479.17
63.30	432.48	389.74	479.90
63.40	433.14	390.33	480.64
63.50	433.80	390.93	481.38
63.60	434.46	391.52	482.12
63.70	435.13	392.12	482.85
63.80	435.79	392.71	483.59
63.90	436.45	393.31	484.33
64.00	437.11	393.90	485.07
64.10	437.78	394.50	485.80
64.20	438.44	395.09	486.54
64.30	439.10	395.69	487.28
64.40	439.76	396.28	488.02
64.50	440.43	396.88	488.75
64.60	441.09	397.47	489.49
64.70	441.75	398.07	490.23
64.80	442.41	398.66	490.97
64.90	443.07	399.25	491.70
65.00	443.74	399.85	492.44
65.10	444.40	400.44	493.18
65.20	445.06	401.04	493.92
65.30	445.72	401.63	494.65
65.40	446.38	402.23	495.39
65.50	447.05	402.82	496.13
65.60	447.71	403.41	496.86
65.70	448.37	404.01	497.60
65.80	449.03	404.60	498.34
65.90	449.69	405.20	499.08
66.00	450.35	405.79	499.81
66.10	451.02	406.39	500.55
66.20	451.68	406.98	501.29
66.30	452.34	407.57	502.02
66.40	453.00	408.17	502.76
66.50	453.66	408.76	503.50
66.60	454.32	409.36	504.23
66.70	454.99	409.95	504.97
66.80	455.65	410.54	505.71
66.90	456.31	411.14	506.44
67.00	456.97	411.73	507.18
67.10	457.63	412.32	507.92
67.20	458.29	412.92	508.65
67.30	458.95	413.51	509.39
67.40	459.62	414.11	510.13
67.50	460.28	414.70	510.86
67.60	460.94	415.29	511.60
67.70	461.60	415.89	512.34
67.80	462.26	416.48	513.07
67.90	462.92	417.07	513.81
68.00	463.58	417.67	514.55
68.10	464.24	418.26	515.28
68.20	464.91	418.85	516.02
68.30	465.57	419.45	516.76
68.40	466.23	420.04	517.49
68.50	466.89	420.63	518.23
68.60	467.55	421.23	518.97
68.70	468.21	421.82	519.70
68.80	468.87	422.41	520.44
68.90	469.53	423.01	521.17
69.00	470.19	423.60	521.91
69.10	470.85	424.19	522.65
69.20	471.51	424.79	523.38
69.30	472.18	425.38	524.12
69.40	472.84	425.97	524.86
69.50	473.50	426.57	525.59
69.60	474.16	427.16	526.33
69.70	474.82	427.75	527.06
69.80	475.48	428.34	527.80
69.90	476.14	428.94	528.54
70.00	476.80	429.53	529.27
70.10	477.46	430.12	530.01
70.20	478.12	430.72	530.74
70.30	478.78	431.31	531.48
70.40	479.44	431.90	532.22
70.50	480.10	432.49	532.95
70.60	480.76	433.09	533.69
70.70	481.42	433.68	534.42
70.80	482.08	434.27	535.16
70.90	482.74	434.86	535.90
71.00	483.40	435.46	536.63
71.10	484.06	436.05	537.37
71.20	484.72	436.64	538.10
71.30	485.38	437.23	538.84
71.40	486.04	437.83	539.57
71.50	486.70	438.42	540.31
71.60	487.36	439.01	541.05
71.70	488.03	439.60	541.78
71.80	488.69	440.20	542.52
71.90	489.35	440.79	543.25
72.00	490.01	441.38	543.99
72.10	490.67	441.97	544.72
72.20	491.32	442.56	545.46
72.30	491.98	443.16	546.19
72.40	492.64	443.75	546.93
72.50	493.30	444.34	547.66
72.60	493.96	444.93	548.40
72.70	494.62	445.52	549.14
72.80	495.28	446.12	549.87
72.90	495.94	446.71	550.61
73.00	496.60	447.30	551.34
73.10	497.26	447.89	552.08
73.20	497.92	448.48	552.81
73.30	498.58	449.08	553.55
73.40	499.24	449.67	554.28
73.50	499.90	450.26	555.02
73.60	500.56	450.85	555.75
73.70	501.22	451.44	556.49
73.80	501.88	452.03	557.22
73.90	502.54	452.63	557.96
74.00	503.20	453.22	558.69
74.10	503.86	453.81	559.43
74.20	504.52	454.40	560.16
74.30	505.18	454.99	560.90
74.40	505.84	455.58	561.63
74.50	506.50	456.18	562.37
74.60	507.16	456.77	563.10
74.70	507.81	457.36	563.84
74.80	508.47	457.95	564.57
74.90	509.13	458.54	565.31
75.00	509.79	459.13	566.04
75.10	510.45	459.72	566.78
75.20	511.11	460.31	567.51
75.30	511.77	460.91	568.25
75.40	512.43	461.50	568.98
75.50	513.09	462.09	569.72
75.60	513.75	462.68	570.45
75.70	514.41	463.27	571.19
75.80	515.06	463.86	571.92
75.90	515.72	464.45	572.65
76.00	516.38	465.04	573.39
76.10	517.04	465.63	574.12
76.20	517.70	466.23	574.86
76.30	518.36	466.82	575.59
76.40	519.02	467.41	576.33
76.50	519.68	468.00	577.06
76.60	520.34	468.59	577.80
76.70	520.99	469.18	578.53
76.80	521.65	469.77	579.27
76.90	522.31	470.36	580.00
77.00	522.97	470.95	580.73
77.10	523.63	471.54	581.47
77.20	524.29	472.13	582.20
77.30	524.95	472.72	582.94
77.40	525.60	473.31	583.67
77.50	526.26	473.91	584.41
77.60	526.92	474.50	585.14
77.70	527.58	475.09	585.87
77.80	528.24	475.68	586.61
77.90	528.90	476.27	587.34
78.00	529.56	476.86	588.08
78.10	530.21	477.45	588.81
78.20	530.87	478.04	589.55
78.30	531.53	478.63	590.28
78.40	532.19	479.22	591.01
78.50	532.85	479.81	591.75
78.60	533.51	480.40	592.48
78.70	534.16	480.99	593.22
78.80	534.82	481.58	593.95
78.90	535.48	482.17	594.68
79.00	536.14	482.76	595.42
79.10	536.80	483.35	596.15
79.20	537.45	483.94	596.89
79.30	538.11	484.53	597.62
79.40	538.77	485.12	598.35
79.50	539.43	485.71	599.09
79.60	540.09	486.30	599.82
79.70	540.74	486.89	600.55
79.80	541.40	487.48	601.29
79.90	542.06	488.07	602.02
80.00	542.72	488.66	602.76
80.10	543.38	489.25	603.49
80.20	544.03	489.84	604.22
80.30	544.69	490.43	604.96
80.40	545.35	491.02	605.69
80.50	546.01	491.61	606.42
80.60	546.66	492.20	607.16
80.70	547.32	492.79	607.89
80.80	547.98	493.38	608.62
80.90	548.64	493.97	609.36
81.00	549.30	494.56	610.09
81.10	549.95	495.15	610.83
81.20	550.61	495.74	611.56
81.30	551.27	496.33	612.29
81.40	551.93	496.92	613.03
81.50	552.58	497.51	613.76
81.60	553.24	498.09	614.49
81.70	553.90	498.68	615.23
81.80	554.56	499.27	615.96
81.90	555.21	499.86	616.69
82.00	555.87	500.45	617.43
82.10	556.53	501.04	618.16
82.20	557.19	501.63	618.89
82.30	557.84	502.22	619.63
82.40	558.50	502.81	620.36
82.50	559.16	503.40	621.09
