# Supplementary material
Source: MDPI journal article supplement (https://www.mdpi.com/2504-446X/8/3/115)
Supplement: s1 [file s1 › Table S11 Crocodylus suchus Framework.csv]

Head Length (cm)	Fit (estimation) (cm)	Lower limit (95% confidence interval) (cm)	Upper limit (95% confidence interval) (cm)
2.70	19.58	17.76	21.59
2.80	20.28	18.39	22.36
2.90	20.98	19.03	23.13
3.00	21.67	19.66	23.89
3.10	22.37	20.29	24.65
3.20	23.06	20.92	25.42
3.30	23.75	21.55	26.18
3.40	24.45	22.18	26.94
3.50	25.14	22.81	27.70
3.60	25.83	23.44	28.46
3.70	26.52	24.07	29.21
3.80	27.21	24.70	29.97
3.90	27.90	25.33	30.73
4.00	28.58	25.95	31.48
4.10	29.27	26.58	32.24
4.20	29.96	27.20	32.99
4.30	30.64	27.83	33.75
4.40	31.33	28.45	34.50
4.50	32.01	29.08	35.25
4.60	32.70	29.70	36.00
4.70	33.38	30.32	36.75
4.80	34.07	30.94	37.50
4.90	34.75	31.56	38.25
5.00	35.43	32.19	39.00
5.10	36.11	32.81	39.75
5.20	36.79	33.43	40.50
5.30	37.47	34.05	41.25
5.40	38.16	34.67	42.00
5.50	38.83	35.28	42.74
5.60	39.51	35.90	43.49
5.70	40.19	36.52	44.24
5.80	40.87	37.14	44.98
5.90	41.55	37.76	45.73
6.00	42.23	38.37	46.47
6.10	42.90	38.99	47.21
6.20	43.58	39.60	47.96
6.30	44.26	40.22	48.70
6.40	44.93	40.83	49.44
6.50	45.61	41.45	50.18
6.60	46.28	42.06	50.93
6.70	46.96	42.68	51.67
6.80	47.63	43.29	52.41
6.90	48.31	43.91	53.15
7.00	48.98	44.52	53.89
7.10	49.65	45.13	54.63
7.20	50.33	45.74	55.37
7.30	51.00	46.36	56.11
7.40	51.67	46.97	56.85
7.50	52.34	47.58	57.58
7.60	53.01	48.19	58.32
7.70	53.69	48.80	59.06
7.80	54.36	49.41	59.80
7.90	55.03	50.02	60.53
8.00	55.70	50.63	61.27
8.10	56.37	51.24	62.01
8.20	57.04	51.85	62.74
8.30	57.71	52.46	63.48
8.40	58.37	53.07	64.21
8.50	59.04	53.68	64.95
8.60	59.71	54.28	65.68
8.70	60.38	54.89	66.42
8.80	61.05	55.50	67.15
8.90	61.71	56.11	67.88
9.00	62.38	56.71	68.62
9.10	63.05	57.32	69.35
9.20	63.72	57.93	70.08
9.30	64.38	58.53	70.82
9.40	65.05	59.14	71.55
9.50	65.71	59.74	72.28
9.60	66.38	60.35	73.01
9.70	67.04	60.95	73.74
9.80	67.71	61.56	74.47
9.90	68.37	62.16	75.21
10.00	69.04	62.77	75.94
10.10	69.70	63.37	76.67
10.20	70.37	63.98	77.40
10.30	71.03	64.58	78.13
10.40	71.69	65.18	78.86
10.50	72.36	65.79	79.59
10.60	73.02	66.39	80.31
10.70	73.68	66.99	81.04
10.80	74.35	67.60	81.77
10.90	75.01	68.20	82.50
11.00	75.67	68.80	83.23
11.10	76.33	69.40	83.96
11.20	76.99	70.00	84.68
11.30	77.66	70.61	85.41
11.40	78.32	71.21	86.14
11.50	78.98	71.81	86.87
11.60	79.64	72.41	87.59
11.70	80.30	73.01	88.32
11.80	80.96	73.61	89.05
11.90	81.62	74.21	89.77
12.00	82.28	74.81	90.50
12.10	82.94	75.41	91.22
12.20	83.60	76.01	91.95
12.30	84.26	76.61	92.67
12.40	84.92	77.21	93.40
12.50	85.58	77.81	94.12
12.60	86.24	78.41	94.85
12.70	86.89	79.00	95.57
12.80	87.55	79.60	96.30
12.90	88.21	80.20	97.02
13.00	88.87	80.80	97.75
13.10	89.53	81.40	98.47
13.20	90.18	81.99	99.19
13.30	90.84	82.59	99.92
13.40	91.50	83.19	100.64
13.50	92.16	83.79	101.36
13.60	92.81	84.38	102.09
13.70	93.47	84.98	102.81
13.80	94.13	85.58	103.53
13.90	94.78	86.17	104.25
14.00	95.44	86.77	104.97
14.10	96.10	87.37	105.70
14.20	96.75	87.96	106.42
14.30	97.41	88.56	107.14
14.40	98.06	89.15	107.86
14.50	98.72	89.75	108.58
14.60	99.37	90.34	109.30
14.70	100.03	90.94	110.02
14.80	100.68	91.53	110.75
14.90	101.34	92.13	111.47
15.00	101.99	92.72	112.19
15.10	102.65	93.32	112.91
15.20	103.30	93.91	113.63
15.30	103.95	94.51	114.35
15.40	104.61	95.10	115.07
15.50	105.26	95.69	115.79
15.60	105.91	96.29	116.50
15.70	106.57	96.88	117.22
15.80	107.22	97.47	117.94
15.90	107.87	98.07	118.66
16.00	108.53	98.66	119.38
16.10	109.18	99.25	120.10
16.20	109.83	99.85	120.82
16.30	110.48	100.44	121.54
16.40	111.14	101.03	122.25
16.50	111.79	101.62	122.97
16.60	112.44	102.22	123.69
16.70	113.09	102.81	124.41
16.80	113.74	103.40	125.12
16.90	114.40	103.99	125.84
17.00	115.05	104.58	126.56
17.10	115.70	105.17	127.28
17.20	116.35	105.76	127.99
17.30	117.00	106.36	128.71
17.40	117.65	106.95	129.43
17.50	118.30	107.54	130.14
17.60	118.95	108.13	130.86
17.70	119.60	108.72	131.58
17.80	120.25	109.31	132.29
17.90	120.90	109.90	133.01
18.00	121.55	110.49	133.72
18.10	122.20	111.08	134.44
18.20	122.85	111.67	135.16
18.30	123.50	112.26	135.87
18.40	124.15	112.85	136.59
18.50	124.80	113.44	137.30
18.60	125.45	114.03	138.02
18.70	126.10	114.62	138.73
18.80	126.75	115.21	139.45
18.90	127.40	115.80	140.16
19.00	128.05	116.38	140.88
19.10	128.69	116.97	141.59
19.20	129.34	117.56	142.30
19.30	129.99	118.15	143.02
19.40	130.64	118.74	143.73
19.50	131.29	119.33	144.45
19.60	131.93	119.91	145.16
19.70	132.58	120.50	145.87
19.80	133.23	121.09	146.59
19.90	133.88	121.68	147.30
20.00	134.52	122.27	148.01
20.10	135.17	122.85	148.73
20.20	135.82	123.44	149.44
20.30	136.47	124.03	150.15
20.40	137.11	124.61	150.87
20.50	137.76	125.20	151.58
20.60	138.41	125.79	152.29
20.70	139.05	126.37	153.00
20.80	139.70	126.96	153.72
20.90	140.35	127.55	154.43
21.00	140.99	128.13	155.14
21.10	141.64	128.72	155.85
21.20	142.28	129.31	156.56
21.30	142.93	129.89	157.28
21.40	143.58	130.48	157.99
21.50	144.22	131.06	158.70
21.60	144.87	131.65	159.41
21.70	145.51	132.24	160.12
21.80	146.16	132.82	160.83
21.90	146.80	133.41	161.54
22.00	147.45	133.99	162.26
22.10	148.09	134.58	162.97
22.20	148.74	135.16	163.68
22.30	149.38	135.75	164.39
22.40	150.03	136.33	165.10
22.50	150.67	136.92	165.81
22.60	151.32	137.50	166.52
22.70	151.96	138.09	167.23
22.80	152.60	138.67	167.94
22.90	153.25	139.25	168.65
23.00	153.89	139.84	169.36
23.10	154.54	140.42	170.07
23.20	155.18	141.01	170.78
23.30	155.82	141.59	171.49
23.40	156.47	142.17	172.20
23.50	157.11	142.76	172.91
23.60	157.75	143.34	173.62
23.70	158.40	143.92	174.33
23.80	159.04	144.51	175.04
23.90	159.68	145.09	175.74
24.00	160.33	145.67	176.45
24.10	160.97	146.26	177.16
24.20	161.61	146.84	177.87
24.30	162.25	147.42	178.58
24.40	162.90	148.01	179.29
24.50	163.54	148.59	180.00
24.60	164.18	149.17	180.71
24.70	164.82	149.75	181.41
24.80	165.47	150.34	182.12
24.90	166.11	150.92	182.83
25.00	166.75	151.50	183.54
25.10	167.39	152.08	184.25
25.20	168.03	152.66	184.95
25.30	168.68	153.25	185.66
25.40	169.32	153.83	186.37
25.50	169.96	154.41	187.08
25.60	170.60	154.99	187.78
25.70	171.24	155.57	188.49
25.80	171.88	156.15	189.20
25.90	172.52	156.73	189.91
26.00	173.17	157.32	190.61
26.10	173.81	157.90	191.32
26.20	174.45	158.48	192.03
26.30	175.09	159.06	192.73
26.40	175.73	159.64	193.44
26.50	176.37	160.22	194.15
26.60	177.01	160.80	194.85
26.70	177.65	161.38	195.56
26.80	178.29	161.96	196.27
26.90	178.93	162.54	196.97
27.00	179.57	163.12	197.68
27.10	180.21	163.70	198.38
27.20	180.85	164.28	199.09
27.30	181.49	164.86	199.80
27.40	182.13	165.44	200.50
27.50	182.77	166.02	201.21
27.60	183.41	166.60	201.91
27.70	184.05	167.18	202.62
27.80	184.69	167.76	203.32
27.90	185.33	168.34	204.03
28.00	185.97	168.92	204.74
28.10	186.61	169.50	205.44
28.20	187.24	170.08	206.15
28.30	187.88	170.66	206.85
28.40	188.52	171.23	207.56
28.50	189.16	171.81	208.26
28.60	189.80	172.39	208.97
28.70	190.44	172.97	209.67
28.80	191.08	173.55	210.37
28.90	191.72	174.13	211.08
29.00	192.35	174.71	211.78
29.10	192.99	175.29	212.49
29.20	193.63	175.86	213.19
29.30	194.27	176.44	213.90
29.40	194.91	177.02	214.60
29.50	195.54	177.60	215.31
29.60	196.18	178.18	216.01
29.70	196.82	178.75	216.71
29.80	197.46	179.33	217.42
29.90	198.10	179.91	218.12
30.00	198.73	180.49	218.82
30.10	199.37	181.06	219.53
30.20	200.01	181.64	220.23
30.30	200.65	182.22	220.94
30.40	201.28	182.80	221.64
30.50	201.92	183.37	222.34
30.60	202.56	183.95	223.05
30.70	203.19	184.53	223.75
30.80	203.83	185.11	224.45
30.90	204.47	185.68	225.15
31.00	205.10	186.26	225.86
31.10	205.74	186.84	226.56
31.20	206.38	187.41	227.26
31.30	207.01	187.99	227.97
31.40	207.65	188.57	228.67
31.50	208.29	189.14	229.37
31.60	208.92	189.72	230.07
31.70	209.56	190.29	230.78
31.80	210.20	190.87	231.48
31.90	210.83	191.45	232.18
32.00	211.47	192.02	232.88
32.10	212.10	192.60	233.59
32.20	212.74	193.17	234.29
32.30	213.38	193.75	234.99
32.40	214.01	194.33	235.69
32.50	214.65	194.90	236.39
32.60	215.28	195.48	237.10
32.70	215.92	196.05	237.80
32.80	216.55	196.63	238.50
32.90	217.19	197.20	239.20
33.00	217.82	197.78	239.90
33.10	218.46	198.35	240.60
33.20	219.09	198.93	241.30
33.30	219.73	199.50	242.01
33.40	220.37	200.08	242.71
33.50	221.00	200.65	243.41
33.60	221.63	201.23	244.11
33.70	222.27	201.80	244.81
33.80	222.90	202.38	245.51
33.90	223.54	202.95	246.21
34.00	224.17	203.53	246.91
34.10	224.81	204.10	247.61
34.20	225.44	204.68	248.32
34.30	226.08	205.25	249.02
34.40	226.71	205.83	249.72
34.50	227.35	206.40	250.42
34.60	227.98	206.97	251.12
34.70	228.61	207.55	251.82
34.80	229.25	208.12	252.52
34.90	229.88	208.70	253.22
35.00	230.52	209.27	253.92
35.10	231.15	209.84	254.62
35.20	231.78	210.42	255.32
35.30	232.42	210.99	256.02
35.40	233.05	211.56	256.72
35.50	233.68	212.14	257.42
35.60	234.32	212.71	258.12
35.70	234.95	213.28	258.82
35.80	235.58	213.86	259.52
35.90	236.22	214.43	260.22
36.00	236.85	215.00	260.92
36.10	237.48	215.58	261.62
36.20	238.12	216.15	262.32
36.30	238.75	216.72	263.02
36.40	239.38	217.30	263.71
36.50	240.02	217.87	264.41
36.60	240.65	218.44	265.11
36.70	241.28	219.01	265.81
36.80	241.91	219.59	266.51
36.90	242.55	220.16	267.21
37.00	243.18	220.73	267.91
37.10	243.81	221.30	268.61
37.20	244.44	221.88	269.31
37.30	245.08	222.45	270.01
37.40	245.71	223.02	270.70
37.50	246.34	223.59	271.40
37.60	246.97	224.16	272.10
37.70	247.61	224.74	272.80
37.80	248.24	225.31	273.50
37.90	248.87	225.88	274.20
38.00	249.50	226.45	274.90
38.10	250.13	227.02	275.59
38.20	250.76	227.60	276.29
38.30	251.40	228.17	276.99
38.40	252.03	228.74	277.69
38.50	252.66	229.31	278.39
38.60	253.29	229.88	279.08
38.70	253.92	230.45	279.78
38.80	254.55	231.02	280.48
38.90	255.19	231.60	281.18
39.00	255.82	232.17	281.88
39.10	256.45	232.74	282.57
39.20	257.08	233.31	283.27
39.30	257.71	233.88	283.97
39.40	258.34	234.45	284.67
39.50	258.97	235.02	285.36
39.60	259.60	235.59	286.06
39.70	260.23	236.16	286.76
39.80	260.86	236.73	287.46
39.90	261.50	237.30	288.15
40.00	262.13	237.88	288.85
40.10	262.76	238.45	289.55
40.20	263.39	239.02	290.24
40.30	264.02	239.59	290.94
40.40	264.65	240.16	291.64
40.50	265.28	240.73	292.33
40.60	265.91	241.30	293.03
40.70	266.54	241.87	293.73
40.80	267.17	242.44	294.43
40.90	267.80	243.01	295.12
41.00	268.43	243.58	295.82
41.10	269.06	244.15	296.52
41.20	269.69	244.72	297.21
41.30	270.32	245.29	297.91
41.40	270.95	245.86	298.60
41.50	271.58	246.43	299.30
41.60	272.21	247.00	300.00
41.70	272.84	247.57	300.69
41.80	273.47	248.13	301.39
41.90	274.10	248.70	302.09
42.00	274.73	249.27	302.78
42.10	275.36	249.84	303.48
42.20	275.99	250.41	304.17
42.30	276.62	250.98	304.87
42.40	277.25	251.55	305.57
42.50	277.87	252.12	306.26
42.60	278.50	252.69	306.96
42.70	279.13	253.26	307.65
42.80	279.76	253.83	308.35
42.90	280.39	254.40	309.04
43.00	281.02	254.96	309.74
43.10	281.65	255.53	310.44
43.20	282.28	256.10	311.13
43.30	282.91	256.67	311.83
43.40	283.54	257.24	312.52
43.50	284.16	257.81	313.22
43.60	284.79	258.38	313.91
43.70	285.42	258.94	314.61
43.80	286.05	259.51	315.30
43.90	286.68	260.08	316.00
44.00	287.31	260.65	316.69
44.10	287.94	261.22	317.39
44.20	288.56	261.78	318.08
44.30	289.19	262.35	318.78
44.40	289.82	262.92	319.47
44.50	290.45	263.49	320.17
44.60	291.08	264.06	320.86
44.70	291.70	264.62	321.56
44.80	292.33	265.19	322.25
44.90	292.96	265.76	322.95
45.00	293.59	266.33	323.64
45.10	294.22	266.89	324.34
45.20	294.84	267.46	325.03
45.30	295.47	268.03	325.72
45.40	296.10	268.60	326.42
45.50	296.73	269.16	327.11
45.60	297.36	269.73	327.81
45.70	297.98	270.30	328.50
45.80	298.61	270.87	329.20
45.90	299.24	271.43	329.89
46.00	299.86	272.00	330.58
46.10	300.49	272.57	331.28
46.20	301.12	273.13	331.97
46.30	301.75	273.70	332.67
46.40	302.37	274.27	333.36
46.50	303.00	274.84	334.05
46.60	303.63	275.40	334.75
46.70	304.26	275.97	335.44
46.80	304.88	276.54	336.13
46.90	305.51	277.10	336.83
47.00	306.14	277.67	337.52
47.10	306.76	278.24	338.22
47.20	307.39	278.80	338.91
47.30	308.02	279.37	339.60
47.40	308.64	279.93	340.30
47.50	309.27	280.50	340.99
47.60	309.90	281.07	341.68
47.70	310.52	281.63	342.38
47.80	311.15	282.20	343.07
47.90	311.78	282.77	343.76
48.00	312.40	283.33	344.45
48.10	313.03	283.90	345.15
48.20	313.65	284.46	345.84
48.30	314.28	285.03	346.53
48.40	314.91	285.60	347.23
48.50	315.53	286.16	347.92
48.60	316.16	286.73	348.61
48.70	316.79	287.29	349.31
48.80	317.41	287.86	350.00
48.90	318.04	288.42	350.69
49.00	318.66	288.99	351.38
49.10	319.29	289.56	352.08
49.20	319.91	290.12	352.77
49.30	320.54	290.69	353.46
49.40	321.17	291.25	354.15
49.50	321.79	291.82	354.85
49.60	322.42	292.38	355.54
49.70	323.04	292.95	356.23
49.80	323.67	293.51	356.92
49.90	324.29	294.08	357.62
50.00	324.92	294.64	358.31
50.10	325.54	295.21	359.00
50.20	326.17	295.77	359.69
50.30	326.80	296.34	360.38
50.40	327.42	296.90	361.08
50.50	328.05	297.47	361.77
50.60	328.67	298.03	362.46
50.70	329.30	298.60	363.15
50.80	329.92	299.16	363.84
50.90	330.55	299.73	364.54
51.00	331.17	300.29	365.23
51.10	331.80	300.85	365.92
51.20	332.42	301.42	366.61
51.30	333.05	301.98	367.30
51.40	333.67	302.55	367.99
51.50	334.30	303.11	368.69
51.60	334.92	303.68	369.38
51.70	335.54	304.24	370.07
51.80	336.17	304.81	370.76
51.90	336.79	305.37	371.45
52.00	337.42	305.93	372.14
52.10	338.04	306.50	372.83
52.20	338.67	307.06	373.53
52.30	339.29	307.63	374.22
52.40	339.92	308.19	374.91
52.50	340.54	308.75	375.60
52.60	341.16	309.32	376.29
52.70	341.79	309.88	376.98
52.80	342.41	310.44	377.67
52.90	343.04	311.01	378.36
53.00	343.66	311.57	379.06
53.10	344.28	312.14	379.75
53.20	344.91	312.70	380.44
53.30	345.53	313.26	381.13
53.40	346.16	313.83	381.82
53.50	346.78	314.39	382.51
53.60	347.40	314.95	383.20
53.70	348.03	315.52	383.89
53.80	348.65	316.08	384.58
53.90	349.28	316.64	385.27
54.00	349.90	317.21	385.96
54.10	350.52	317.77	386.65
54.20	351.15	318.33	387.34
54.30	351.77	318.89	388.03
54.40	352.39	319.46	388.72
54.50	353.02	320.02	389.41
54.60	353.64	320.58	390.10
54.70	354.26	321.15	390.80
54.80	354.89	321.71	391.49
54.90	355.51	322.27	392.18
55.00	356.13	322.83	392.87
55.10	356.76	323.40	393.56
55.20	357.38	323.96	394.25
55.30	358.00	324.52	394.94
55.40	358.62	325.08	395.63
55.50	359.25	325.65	396.32
55.60	359.87	326.21	397.01
55.70	360.49	326.77	397.70
55.80	361.12	327.33	398.39
55.90	361.74	327.90	399.08
56.00	362.36	328.46	399.76
56.10	362.98	329.02	400.45
56.20	363.61	329.58	401.14
56.30	364.23	330.15	401.83
56.40	364.85	330.71	402.52
56.50	365.48	331.27	403.21
56.60	366.10	331.83	403.90
56.70	366.72	332.39	404.59
56.80	367.34	332.96	405.28
56.90	367.97	333.52	405.97
57.00	368.59	334.08	406.66
57.10	369.21	334.64	407.35
57.20	369.83	335.20	408.04
57.30	370.45	335.76	408.73
57.40	371.08	336.33	409.42
57.50	371.70	336.89	410.11
57.60	372.32	337.45	410.80
57.70	372.94	338.01	411.49
57.80	373.56	338.57	412.17
57.90	374.19	339.13	412.86
58.00	374.81	339.69	413.55
58.10	375.43	340.26	414.24
58.20	376.05	340.82	414.93
58.30	376.67	341.38	415.62
58.40	377.30	341.94	416.31
58.50	377.92	342.50	417.00
58.60	378.54	343.06	417.69
58.70	379.16	343.62	418.37
58.80	379.78	344.18	419.06
58.90	380.40	344.75	419.75
59.00	381.03	345.31	420.44
59.10	381.65	345.87	421.13
59.20	382.27	346.43	421.82
59.30	382.89	346.99	422.51
59.40	383.51	347.55	423.19
59.50	384.13	348.11	423.88
59.60	384.75	348.67	424.57
59.70	385.38	349.23	425.26
59.80	386.00	349.79	425.95
59.90	386.62	350.35	426.64
60.00	387.24	350.91	427.32
60.10	387.86	351.47	428.01
60.20	388.48	352.03	428.70
60.30	389.10	352.60	429.39
60.40	389.72	353.16	430.08
60.50	390.34	353.72	430.77
60.60	390.97	354.28	431.45
60.70	391.59	354.84	432.14
60.80	392.21	355.40	432.83
60.90	392.83	355.96	433.52
61.00	393.45	356.52	434.21
61.10	394.07	357.08	434.89
61.20	394.69	357.64	435.58
61.30	395.31	358.20	436.27
61.40	395.93	358.76	436.96
61.50	396.55	359.32	437.64
61.60	397.17	359.88	438.33
61.70	397.79	360.44	439.02
61.80	398.41	361.00	439.71
61.90	399.03	361.56	440.39
62.00	399.65	362.12	441.08
62.10	400.27	362.68	441.77
62.20	400.89	363.24	442.46
62.30	401.51	363.80	443.14
62.40	402.13	364.36	443.83
62.50	402.76	364.91	444.52
62.60	403.38	365.47	445.21
62.70	404.00	366.03	445.89
62.80	404.62	366.59	446.58
62.90	405.24	367.15	447.27
63.00	405.86	367.71	447.96
63.10	406.48	368.27	448.64
63.20	407.10	368.83	449.33
63.30	407.72	369.39	450.02
63.40	408.34	369.95	450.70
63.50	408.95	370.51	451.39
63.60	409.57	371.07	452.08
63.70	410.19	371.63	452.77
63.80	410.81	372.19	453.45
63.90	411.43	372.74	454.14
64.00	412.05	373.30	454.83
64.10	412.67	373.86	455.51
64.20	413.29	374.42	456.20
64.30	413.91	374.98	456.89
64.40	414.53	375.54	457.57
64.50	415.15	376.10	458.26
64.60	415.77	376.66	458.95
64.70	416.39	377.21	459.63
64.80	417.01	377.77	460.32
64.90	417.63	378.33	461.01
65.00	418.25	378.89	461.69
65.10	418.87	379.45	462.38
65.20	419.49	380.01	463.07
65.30	420.11	380.57	463.75
65.40	420.72	381.12	464.44
65.50	421.34	381.68	465.13
65.60	421.96	382.24	465.81
65.70	422.58	382.80	466.50
65.80	423.20	383.36	467.18
65.90	423.82	383.92	467.87
66.00	424.44	384.47	468.56
66.10	425.06	385.03	469.24
66.20	425.68	385.59	469.93
66.30	426.30	386.15	470.62
66.40	426.91	386.71	471.30
66.50	427.53	387.27	471.99
66.60	428.15	387.82	472.67
66.70	428.77	388.38	473.36
66.80	429.39	388.94	474.05
66.90	430.01	389.50	474.73
67.00	430.63	390.05	475.42
67.10	431.24	390.61	476.10
67.20	431.86	391.17	476.79
67.30	432.48	391.73	477.47
67.40	433.10	392.29	478.16
67.50	433.72	392.84	478.85
67.60	434.34	393.40	479.53
67.70	434.95	393.96	480.22
67.80	435.57	394.52	480.90
67.90	436.19	395.07	481.59
68.00	436.81	395.63	482.27
68.10	437.43	396.19	482.96
68.20	438.05	396.75	483.65
68.30	438.66	397.30	484.33
68.40	439.28	397.86	485.02
68.50	439.90	398.42	485.70
68.60	440.52	398.98	486.39
68.70	441.14	399.53	487.07
68.80	441.75	400.09	487.76
68.90	442.37	400.65	488.44
69.00	442.99	401.20	489.13
69.10	443.61	401.76	489.81
69.20	444.23	402.32	490.50
69.30	444.84	402.87	491.18
69.40	445.46	403.43	491.87
69.50	446.08	403.99	492.55
69.60	446.70	404.55	493.24
69.70	447.31	405.10	493.92
69.80	447.93	405.66	494.61
69.90	448.55	406.22	495.29
70.00	449.17	406.77	495.98
70.10	449.78	407.33	496.66
70.20	450.40	407.89	497.35
70.30	451.02	408.44	498.03
70.40	451.64	409.00	498.72
70.50	452.25	409.56	499.40
70.60	452.87	410.11	500.09
70.70	453.49	410.67	500.77
70.80	454.11	411.23	501.46
70.90	454.72	411.78	502.14
71.00	455.34	412.34	502.83
71.10	455.96	412.89	503.51
71.20	456.58	413.45	504.20
71.30	457.19	414.01	504.88
71.40	457.81	414.56	505.57
71.50	458.43	415.12	506.25
71.60	459.04	415.68	506.94
71.70	459.66	416.23	507.62
71.80	460.28	416.79	508.30
71.90	460.89	417.34	508.99
72.00	461.51	417.90	509.67
72.10	462.13	418.46	510.36
72.20	462.74	419.01	511.04
72.30	463.36	419.57	511.73
72.40	463.98	420.12	512.41
72.50	464.60	420.68	513.09
72.60	465.21	421.24	513.78
72.70	465.83	421.79	514.46
72.80	466.45	422.35	515.15
72.90	467.06	422.90	515.83
73.00	467.68	423.46	516.51
73.10	468.29	424.02	517.20
73.20	468.91	424.57	517.88
73.30	469.53	425.13	518.57
73.40	470.14	425.68	519.25
73.50	470.76	426.24	519.93
73.60	471.38	426.79	520.62
73.70	471.99	427.35	521.30
73.80	472.61	427.90	521.99
73.90	473.23	428.46	522.67
74.00	473.84	429.01	523.35
74.10	474.46	429.57	524.04
74.20	475.07	430.13	524.72
74.30	475.69	430.68	525.41
74.40	476.31	431.24	526.09
74.50	476.92	431.79	526.77
74.60	477.54	432.35	527.46
74.70	478.16	432.90	528.14
74.80	478.77	433.46	528.82
74.90	479.39	434.01	529.51
75.00	480.00	434.57	530.19
75.10	480.62	435.12	530.87
75.20	481.24	435.68	531.56
75.30	481.85	436.23	532.24
75.40	482.47	436.79	532.92
75.50	483.08	437.34	533.61
75.60	483.70	437.90	534.29
75.70	484.31	438.45	534.97
75.80	484.93	439.01	535.66
75.90	485.55	439.56	536.34
76.00	486.16	440.12	537.02
76.10	486.78	440.67	537.71
76.20	487.39	441.23	538.39
76.30	488.01	441.78	539.07
76.40	488.62	442.33	539.76
76.50	489.24	442.89	540.44
76.60	489.85	443.44	541.12
76.70	490.47	444.00	541.81
76.80	491.09	444.55	542.49
76.90	491.70	445.11	543.17
77.00	492.32	445.66	543.85
77.10	492.93	446.22	544.54
77.20	493.55	446.77	545.22
77.30	494.16	447.32	545.90
77.40	494.78	447.88	546.59
77.50	495.39	448.43	547.27
77.60	496.01	448.99	547.95
77.70	496.62	449.54	548.63
77.80	497.24	450.10	549.32
77.90	497.85	450.65	550.00
78.00	498.47	451.20	550.68
78.10	499.08	451.76	551.37
78.20	499.70	452.31	552.05
78.30	500.31	452.87	552.73
78.40	500.93	453.42	553.41
78.50	501.54	453.97	554.10
78.60	502.16	454.53	554.78
78.70	502.77	455.08	555.46
78.80	503.39	455.64	556.14
78.90	504.00	456.19	556.83
79.00	504.62	456.74	557.51
79.10	505.23	457.30	558.19
79.20	505.85	457.85	558.87
79.30	506.46	458.40	559.55
79.40	507.08	458.96	560.24
79.50	507.69	459.51	560.92
79.60	508.30	460.06	561.60
79.70	508.92	460.62	562.28
79.80	509.53	461.17	562.97
79.90	510.15	461.73	563.65
80.00	510.76	462.28	564.33
80.10	511.38	462.83	565.01
80.20	511.99	463.39	565.69
80.30	512.61	463.94	566.38
80.40	513.22	464.49	567.06
80.50	513.83	465.05	567.74
80.60	514.45	465.60	568.42
80.70	515.06	466.15	569.10
80.80	515.68	466.71	569.79
80.90	516.29	467.26	570.47
81.00	516.91	467.81	571.15
81.10	517.52	468.37	571.83
81.20	518.13	468.92	572.51
81.30	518.75	469.47	573.20
81.40	519.36	470.02	573.88
81.50	519.98	470.58	574.56
81.60	520.59	471.13	575.24
81.70	521.20	471.68	575.92
81.80	521.82	472.24	576.60
81.90	522.43	472.79	577.29
82.00	523.05	473.34	577.97
82.10	523.66	473.89	578.65
82.20	524.27	474.45	579.33
82.30	524.89	475.00	580.01
82.40	525.50	475.55	580.69
82.50	526.11	476.11	581.38
