# Supplementary material
Source: MDPI journal article supplement (https://www.mdpi.com/2504-446X/8/3/115)
Supplement: s1 [file s1 › Table S12 Gavialis gangeticus Framework.csv]

Head Length (cm)	Fit (estimation) (cm)	Lower limit (95% confidence interval) (cm)	Upper limit (95% confidence interval) (cm)
2.70	15.50	13.17	18.25
2.80	16.07	13.65	18.91
2.90	16.64	14.14	19.58
3.00	17.21	14.63	20.24
3.10	17.77	15.12	20.90
3.20	18.34	15.60	21.56
3.30	18.91	16.09	22.23
3.40	19.48	16.57	22.89
3.50	20.04	17.06	23.55
3.60	20.61	17.55	24.21
3.70	21.18	18.03	24.87
3.80	21.74	18.52	25.53
3.90	22.31	19.01	26.19
4.00	22.88	19.49	26.85
4.10	23.44	19.98	27.51
4.20	24.01	20.46	28.17
4.30	24.57	20.95	28.82
4.40	25.14	21.44	29.48
4.50	25.70	21.92	30.14
4.60	26.27	22.41	30.80
4.70	26.84	22.89	31.46
4.80	27.40	23.38	32.11
4.90	27.97	23.86	32.77
5.00	28.53	24.35	33.43
5.10	29.09	24.83	34.09
5.20	29.66	25.32	34.74
5.30	30.22	25.80	35.40
5.40	30.79	26.29	36.06
5.50	31.35	26.77	36.71
5.60	31.92	27.26	37.37
5.70	32.48	27.74	38.03
5.80	33.05	28.23	38.68
5.90	33.61	28.71	39.34
6.00	34.17	29.20	39.99
6.10	34.74	29.68	40.65
6.20	35.30	30.17	41.31
6.30	35.86	30.65	41.96
6.40	36.43	31.14	42.62
6.50	36.99	31.62	43.27
6.60	37.55	32.11	43.93
6.70	38.12	32.59	44.58
6.80	38.68	33.08	45.24
6.90	39.24	33.56	45.89
7.00	39.81	34.04	46.54
7.10	40.37	34.53	47.20
7.20	40.93	35.01	47.85
7.30	41.49	35.50	48.51
7.40	42.06	35.98	49.16
7.50	42.62	36.46	49.81
7.60	43.18	36.95	50.47
7.70	43.74	37.43	51.12
7.80	44.31	37.92	51.78
7.90	44.87	38.40	52.43
8.00	45.43	38.88	53.08
8.10	45.99	39.37	53.73
8.20	46.56	39.85	54.39
8.30	47.12	40.33	55.04
8.40	47.68	40.82	55.69
8.50	48.24	41.30	56.35
8.60	48.80	41.79	57.00
8.70	49.36	42.27	57.65
8.80	49.93	42.75	58.30
8.90	50.49	43.24	58.96
9.00	51.05	43.72	59.61
9.10	51.61	44.20	60.26
9.20	52.17	44.68	60.91
9.30	52.73	45.17	61.57
9.40	53.29	45.65	62.22
9.50	53.86	46.13	62.87
9.60	54.42	46.62	63.52
9.70	54.98	47.10	64.17
9.80	55.54	47.58	64.83
9.90	56.10	48.07	65.48
10.00	56.66	48.55	66.13
10.10	57.22	49.03	66.78
10.20	57.78	49.51	67.43
10.30	58.34	50.00	68.08
10.40	58.90	50.48	68.73
10.50	59.46	50.96	69.39
10.60	60.03	51.44	70.04
10.70	60.59	51.93	70.69
10.80	61.15	52.41	71.34
10.90	61.71	52.89	71.99
11.00	62.27	53.37	72.64
11.10	62.83	53.86	73.29
11.20	63.39	54.34	73.94
11.30	63.95	54.82	74.59
11.40	64.51	55.30	75.24
11.50	65.07	55.79	75.89
11.60	65.63	56.27	76.54
11.70	66.19	56.75	77.19
11.80	66.75	57.23	77.85
11.90	67.31	57.71	78.50
12.00	67.87	58.20	79.15
12.10	68.43	58.68	79.80
12.20	68.99	59.16	80.45
12.30	69.55	59.64	81.10
12.40	70.11	60.12	81.75
12.50	70.67	60.61	82.40
12.60	71.23	61.09	83.05
12.70	71.79	61.57	83.70
12.80	72.34	62.05	84.35
12.90	72.90	62.53	85.00
13.00	73.46	63.01	85.65
13.10	74.02	63.50	86.29
13.20	74.58	63.98	86.94
13.30	75.14	64.46	87.59
13.40	75.70	64.94	88.24
13.50	76.26	65.42	88.89
13.60	76.82	65.90	89.54
13.70	77.38	66.39	90.19
13.80	77.94	66.87	90.84
13.90	78.50	67.35	91.49
14.00	79.06	67.83	92.14
14.10	79.61	68.31	92.79
14.20	80.17	68.79	93.44
14.30	80.73	69.27	94.09
14.40	81.29	69.75	94.74
14.50	81.85	70.24	95.38
14.60	82.41	70.72	96.03
14.70	82.97	71.20	96.68
14.80	83.53	71.68	97.33
14.90	84.08	72.16	97.98
15.00	84.64	72.64	98.63
15.10	85.20	73.12	99.28
15.20	85.76	73.60	99.93
15.30	86.32	74.08	100.57
15.40	86.88	74.56	101.22
15.50	87.44	75.05	101.87
15.60	87.99	75.53	102.52
15.70	88.55	76.01	103.17
15.80	89.11	76.49	103.82
15.90	89.67	76.97	104.47
16.00	90.23	77.45	105.11
16.10	90.79	77.93	105.76
16.20	91.34	78.41	106.41
16.30	91.90	78.89	107.06
16.40	92.46	79.37	107.71
16.50	93.02	79.85	108.35
16.60	93.58	80.33	109.00
16.70	94.13	80.81	109.65
16.80	94.69	81.29	110.30
16.90	95.25	81.77	110.95
17.00	95.81	82.25	111.59
17.10	96.37	82.73	112.24
17.20	96.92	83.21	112.89
17.30	97.48	83.69	113.54
17.40	98.04	84.17	114.19
17.50	98.60	84.65	114.83
17.60	99.15	85.13	115.48
17.70	99.71	85.61	116.13
17.80	100.27	86.09	116.78
17.90	100.83	86.58	117.42
18.00	101.38	87.06	118.07
18.10	101.94	87.54	118.72
18.20	102.50	88.02	119.37
18.30	103.06	88.49	120.01
18.40	103.61	88.97	120.66
18.50	104.17	89.45	121.31
18.60	104.73	89.93	121.96
18.70	105.29	90.41	122.60
18.80	105.84	90.89	123.25
18.90	106.40	91.37	123.90
19.00	106.96	91.85	124.55
19.10	107.52	92.33	125.19
19.20	108.07	92.81	125.84
19.30	108.63	93.29	126.49
19.40	109.19	93.77	127.13
19.50	109.74	94.25	127.78
19.60	110.30	94.73	128.43
19.70	110.86	95.21	129.08
19.80	111.41	95.69	129.72
19.90	111.97	96.17	130.37
20.00	112.53	96.65	131.02
20.10	113.09	97.13	131.66
20.20	113.64	97.61	132.31
20.30	114.20	98.09	132.96
20.40	114.76	98.57	133.60
20.50	115.31	99.05	134.25
20.60	115.87	99.53	134.90
20.70	116.43	100.01	135.54
20.80	116.98	100.48	136.19
20.90	117.54	100.96	136.84
21.00	118.10	101.44	137.48
21.10	118.65	101.92	138.13
21.20	119.21	102.40	138.78
21.30	119.77	102.88	139.42
21.40	120.32	103.36	140.07
21.50	120.88	103.84	140.72
21.60	121.44	104.32	141.36
21.70	121.99	104.80	142.01
21.80	122.55	105.28	142.66
21.90	123.11	105.75	143.30
22.00	123.66	106.23	143.95
22.10	124.22	106.71	144.60
22.20	124.78	107.19	145.24
22.30	125.33	107.67	145.89
22.40	125.89	108.15	146.54
22.50	126.44	108.63	147.18
22.60	127.00	109.11	147.83
22.70	127.56	109.59	148.47
22.80	128.11	110.06	149.12
22.90	128.67	110.54	149.77
23.00	129.23	111.02	150.41
23.10	129.78	111.50	151.06
23.20	130.34	111.98	151.71
23.30	130.89	112.46	152.35
23.40	131.45	112.94	153.00
23.50	132.01	113.42	153.64
23.60	132.56	113.89	154.29
23.70	133.12	114.37	154.94
23.80	133.67	114.85	155.58
23.90	134.23	115.33	156.23
24.00	134.79	115.81	156.87
24.10	135.34	116.29	157.52
24.20	135.90	116.76	158.17
24.30	136.45	117.24	158.81
24.40	137.01	117.72	159.46
24.50	137.56	118.20	160.10
24.60	138.12	118.68	160.75
24.70	138.68	119.16	161.39
24.80	139.23	119.63	162.04
24.90	139.79	120.11	162.69
25.00	140.34	120.59	163.33
25.10	140.90	121.07	163.98
25.20	141.45	121.55	164.62
25.30	142.01	122.03	165.27
25.40	142.57	122.50	165.91
25.50	143.12	122.98	166.56
25.60	143.68	123.46	167.21
25.70	144.23	123.94	167.85
25.80	144.79	124.42	168.50
25.90	145.34	124.89	169.14
26.00	145.90	125.37	169.79
26.10	146.45	125.85	170.43
26.20	147.01	126.33	171.08
26.30	147.57	126.81	171.72
26.40	148.12	127.28	172.37
26.50	148.68	127.76	173.01
26.60	149.23	128.24	173.66
26.70	149.79	128.72	174.31
26.80	150.34	129.20	174.95
26.90	150.90	129.67	175.60
27.00	151.45	130.15	176.24
27.10	152.01	130.63	176.89
27.20	152.56	131.11	177.53
27.30	153.12	131.58	178.18
27.40	153.67	132.06	178.82
27.50	154.23	132.54	179.47
27.60	154.78	133.02	180.11
27.70	155.34	133.49	180.76
27.80	155.89	133.97	181.40
27.90	156.45	134.45	182.05
28.00	157.00	134.93	182.69
28.10	157.56	135.40	183.34
28.20	158.11	135.88	183.98
28.30	158.67	136.36	184.63
28.40	159.22	136.84	185.27
28.50	159.78	137.31	185.92
28.60	160.33	137.79	186.56
28.70	160.89	138.27	187.21
28.80	161.44	138.75	187.85
28.90	162.00	139.22	188.50
29.00	162.55	139.70	189.14
29.10	163.11	140.18	189.79
29.20	163.66	140.66	190.43
29.30	164.22	141.13	191.08
29.40	164.77	141.61	191.72
29.50	165.33	142.09	192.37
29.60	165.88	142.57	193.01
29.70	166.44	143.04	193.66
29.80	166.99	143.52	194.30
29.90	167.55	144.00	194.95
30.00	168.10	144.47	195.59
30.10	168.66	144.95	196.24
30.20	169.21	145.43	196.88
30.30	169.77	145.91	197.53
30.40	170.32	146.38	198.17
30.50	170.87	146.86	198.82
30.60	171.43	147.34	199.46
30.70	171.98	147.81	200.11
30.80	172.54	148.29	200.75
30.90	173.09	148.77	201.39
31.00	173.65	149.24	202.04
31.10	174.20	149.72	202.68
31.20	174.76	150.20	203.33
31.30	175.31	150.68	203.97
31.40	175.86	151.15	204.62
31.50	176.42	151.63	205.26
31.60	176.97	152.11	205.91
31.70	177.53	152.58	206.55
31.80	178.08	153.06	207.20
31.90	178.64	153.54	207.84
32.00	179.19	154.01	208.49
32.10	179.75	154.49	209.13
32.20	180.30	154.97	209.77
32.30	180.85	155.44	210.42
32.40	181.41	155.92	211.06
32.50	181.96	156.40	211.71
32.60	182.52	156.87	212.35
32.70	183.07	157.35	213.00
32.80	183.62	157.83	213.64
32.90	184.18	158.30	214.28
33.00	184.73	158.78	214.93
33.10	185.29	159.26	215.57
33.20	185.84	159.73	216.22
33.30	186.40	160.21	216.86
33.40	186.95	160.69	217.51
33.50	187.50	161.16	218.15
33.60	188.06	161.64	218.79
33.70	188.61	162.11	219.44
33.80	189.17	162.59	220.08
33.90	189.72	163.07	220.73
34.00	190.27	163.54	221.37
34.10	190.83	164.02	222.02
34.20	191.38	164.50	222.66
34.30	191.94	164.97	223.30
34.40	192.49	165.45	223.95
34.50	193.04	165.93	224.59
34.60	193.60	166.40	225.24
34.70	194.15	166.88	225.88
34.80	194.70	167.35	226.52
34.90	195.26	167.83	227.17
35.00	195.81	168.31	227.81
35.10	196.37	168.78	228.46
35.20	196.92	169.26	229.10
35.30	197.47	169.73	229.75
35.40	198.03	170.21	230.39
35.50	198.58	170.69	231.03
35.60	199.13	171.16	231.68
35.70	199.69	171.64	232.32
35.80	200.24	172.12	232.97
35.90	200.80	172.59	233.61
36.00	201.35	173.07	234.25
36.10	201.90	173.54	234.90
36.20	202.46	174.02	235.54
36.30	203.01	174.50	236.18
36.40	203.56	174.97	236.83
36.50	204.12	175.45	237.47
36.60	204.67	175.92	238.12
36.70	205.22	176.40	238.76
36.80	205.78	176.87	239.40
36.90	206.33	177.35	240.05
37.00	206.88	177.83	240.69
37.10	207.44	178.30	241.34
37.20	207.99	178.78	241.98
37.30	208.55	179.25	242.62
37.40	209.10	179.73	243.27
37.50	209.65	180.21	243.91
37.60	210.21	180.68	244.55
37.70	210.76	181.16	245.20
37.80	211.31	181.63	245.84
37.90	211.87	182.11	246.49
38.00	212.42	182.58	247.13
38.10	212.97	183.06	247.77
38.20	213.53	183.54	248.42
38.30	214.08	184.01	249.06
38.40	214.63	184.49	249.70
38.50	215.19	184.96	250.35
38.60	215.74	185.44	250.99
38.70	216.29	185.91	251.63
38.80	216.85	186.39	252.28
38.90	217.40	186.86	252.92
39.00	217.95	187.34	253.57
39.10	218.50	187.81	254.21
39.20	219.06	188.29	254.85
39.30	219.61	188.77	255.50
39.40	220.16	189.24	256.14
39.50	220.72	189.72	256.78
39.60	221.27	190.19	257.43
39.70	221.82	190.67	258.07
39.80	222.38	191.14	258.71
39.90	222.93	191.62	259.36
40.00	223.48	192.09	260.00
40.10	224.04	192.57	260.64
40.20	224.59	193.04	261.29
40.30	225.14	193.52	261.93
40.40	225.69	193.99	262.57
40.50	226.25	194.47	263.22
40.60	226.80	194.95	263.86
40.70	227.35	195.42	264.51
40.80	227.91	195.90	265.15
40.90	228.46	196.37	265.79
41.00	229.01	196.85	266.44
41.10	229.57	197.32	267.08
41.20	230.12	197.80	267.72
41.30	230.67	198.27	268.37
41.40	231.22	198.75	269.01
41.50	231.78	199.22	269.65
41.60	232.33	199.70	270.30
41.70	232.88	200.17	270.94
41.80	233.44	200.65	271.58
41.90	233.99	201.12	272.23
42.00	234.54	201.60	272.87
42.10	235.09	202.07	273.51
42.20	235.65	202.55	274.16
42.30	236.20	203.02	274.80
42.40	236.75	203.50	275.44
42.50	237.30	203.97	276.08
42.60	237.86	204.45	276.73
42.70	238.41	204.92	277.37
42.80	238.96	205.40	278.01
42.90	239.52	205.87	278.66
43.00	240.07	206.35	279.30
43.10	240.62	206.82	279.94
43.20	241.17	207.30	280.59
43.30	241.73	207.77	281.23
43.40	242.28	208.25	281.87
43.50	242.83	208.72	282.52
43.60	243.38	209.19	283.16
43.70	243.94	209.67	283.80
43.80	244.49	210.14	284.45
43.90	245.04	210.62	285.09
44.00	245.59	211.09	285.73
44.10	246.15	211.57	286.38
44.20	246.70	212.04	287.02
44.30	247.25	212.52	287.66
44.40	247.80	212.99	288.30
44.50	248.36	213.47	288.95
44.60	248.91	213.94	289.59
44.70	249.46	214.42	290.23
44.80	250.01	214.89	290.88
44.90	250.57	215.37	291.52
45.00	251.12	215.84	292.16
45.10	251.67	216.31	292.81
45.20	252.22	216.79	293.45
45.30	252.78	217.26	294.09
45.40	253.33	217.74	294.73
45.50	253.88	218.21	295.38
45.60	254.43	218.69	296.02
45.70	254.98	219.16	296.66
45.80	255.54	219.64	297.31
45.90	256.09	220.11	297.95
46.00	256.64	220.58	298.59
46.10	257.19	221.06	299.24
46.20	257.75	221.53	299.88
46.30	258.30	222.01	300.52
46.40	258.85	222.48	301.16
46.50	259.40	222.96	301.81
46.60	259.95	223.43	302.45
46.70	260.51	223.90	303.09
46.80	261.06	224.38	303.74
46.90	261.61	224.85	304.38
47.00	262.16	225.33	305.02
47.10	262.72	225.80	305.66
47.20	263.27	226.28	306.31
47.30	263.82	226.75	306.95
47.40	264.37	227.22	307.59
47.50	264.92	227.70	308.24
47.60	265.48	228.17	308.88
47.70	266.03	228.65	309.52
47.80	266.58	229.12	310.16
47.90	267.13	229.60	310.81
48.00	267.68	230.07	311.45
48.10	268.24	230.54	312.09
48.20	268.79	231.02	312.73
48.30	269.34	231.49	313.38
48.40	269.89	231.97	314.02
48.50	270.44	232.44	314.66
48.60	271.00	232.91	315.31
48.70	271.55	233.39	315.95
48.80	272.10	233.86	316.59
48.90	272.65	234.34	317.23
49.00	273.20	234.81	317.88
49.10	273.76	235.28	318.52
49.20	274.31	235.76	319.16
49.30	274.86	236.23	319.80
49.40	275.41	236.71	320.45
49.50	275.96	237.18	321.09
49.60	276.52	237.65	321.73
49.70	277.07	238.13	322.37
49.80	277.62	238.60	323.02
49.90	278.17	239.07	323.66
50.00	278.72	239.55	324.30
50.10	279.27	240.02	324.94
50.20	279.83	240.50	325.59
50.30	280.38	240.97	326.23
50.40	280.93	241.44	326.87
50.50	281.48	241.92	327.52
50.60	282.03	242.39	328.16
50.70	282.58	242.86	328.80
50.80	283.14	243.34	329.44
50.90	283.69	243.81	330.09
51.00	284.24	244.29	330.73
51.10	284.79	244.76	331.37
51.20	285.34	245.23	332.01
51.30	285.89	245.71	332.66
51.40	286.45	246.18	333.30
51.50	287.00	246.65	333.94
51.60	287.55	247.13	334.58
51.70	288.10	247.60	335.23
51.80	288.65	248.08	335.87
51.90	289.20	248.55	336.51
52.00	289.76	249.02	337.15
52.10	290.31	249.50	337.80
52.20	290.86	249.97	338.44
52.30	291.41	250.44	339.08
52.40	291.96	250.92	339.72
52.50	292.51	251.39	340.37
52.60	293.07	251.86	341.01
52.70	293.62	252.34	341.65
52.80	294.17	252.81	342.29
52.90	294.72	253.28	342.93
53.00	295.27	253.76	343.58
53.10	295.82	254.23	344.22
53.20	296.37	254.70	344.86
53.30	296.93	255.18	345.50
53.40	297.48	255.65	346.15
53.50	298.03	256.12	346.79
53.60	298.58	256.60	347.43
53.70	299.13	257.07	348.07
53.80	299.68	257.54	348.72
53.90	300.23	258.02	349.36
54.00	300.79	258.49	350.00
54.10	301.34	258.96	350.64
54.20	301.89	259.44	351.29
54.30	302.44	259.91	351.93
54.40	302.99	260.38	352.57
54.50	303.54	260.86	353.21
54.60	304.09	261.33	353.85
54.70	304.64	261.80	354.50
54.80	305.20	262.28	355.14
54.90	305.75	262.75	355.78
55.00	306.30	263.22	356.42
55.10	306.85	263.70	357.07
55.20	307.40	264.17	357.71
55.30	307.95	264.64	358.35
55.40	308.50	265.12	358.99
55.50	309.05	265.59	359.63
55.60	309.61	266.06	360.28
55.70	310.16	266.53	360.92
55.80	310.71	267.01	361.56
55.90	311.26	267.48	362.20
56.00	311.81	267.95	362.85
56.10	312.36	268.43	363.49
56.20	312.91	268.90	364.13
56.30	313.46	269.37	364.77
56.40	314.02	269.85	365.41
56.50	314.57	270.32	366.06
56.60	315.12	270.79	366.70
56.70	315.67	271.26	367.34
56.80	316.22	271.74	367.98
56.90	316.77	272.21	368.63
57.00	317.32	272.68	369.27
57.10	317.87	273.16	369.91
57.20	318.42	273.63	370.55
57.30	318.98	274.10	371.19
57.40	319.53	274.58	371.84
57.50	320.08	275.05	372.48
57.60	320.63	275.52	373.12
57.70	321.18	275.99	373.76
57.80	321.73	276.47	374.40
57.90	322.28	276.94	375.05
58.00	322.83	277.41	375.69
58.10	323.38	277.89	376.33
58.20	323.93	278.36	376.97
58.30	324.48	278.83	377.61
58.40	325.04	279.30	378.26
58.50	325.59	279.78	378.90
58.60	326.14	280.25	379.54
58.70	326.69	280.72	380.18
58.80	327.24	281.19	380.82
58.90	327.79	281.67	381.47
59.00	328.34	282.14	382.11
59.10	328.89	282.61	382.75
59.20	329.44	283.08	383.39
59.30	329.99	283.56	384.03
59.40	330.54	284.03	384.68
59.50	331.10	284.50	385.32
59.60	331.65	284.98	385.96
59.70	332.20	285.45	386.60
59.80	332.75	285.92	387.24
59.90	333.30	286.39	387.89
60.00	333.85	286.87	388.53
60.10	334.40	287.34	389.17
60.20	334.95	287.81	389.81
60.30	335.50	288.28	390.45
60.40	336.05	288.76	391.10
60.50	336.60	289.23	391.74
60.60	337.15	289.70	392.38
60.70	337.70	290.17	393.02
60.80	338.26	290.65	393.66
60.90	338.81	291.12	394.31
61.00	339.36	291.59	394.95
61.10	339.91	292.06	395.59
61.20	340.46	292.54	396.23
61.30	341.01	293.01	396.87
61.40	341.56	293.48	397.52
61.50	342.11	293.95	398.16
61.60	342.66	294.42	398.80
61.70	343.21	294.90	399.44
61.80	343.76	295.37	400.08
61.90	344.31	295.84	400.72
62.00	344.86	296.31	401.37
62.10	345.41	296.79	402.01
62.20	345.96	297.26	402.65
62.30	346.51	297.73	403.29
62.40	347.07	298.20	403.93
62.50	347.62	298.68	404.58
62.60	348.17	299.15	405.22
62.70	348.72	299.62	405.86
62.80	349.27	300.09	406.50
62.90	349.82	300.56	407.14
63.00	350.37	301.04	407.79
63.10	350.92	301.51	408.43
63.20	351.47	301.98	409.07
63.30	352.02	302.45	409.71
63.40	352.57	302.93	410.35
63.50	353.12	303.40	410.99
63.60	353.67	303.87	411.64
63.70	354.22	304.34	412.28
63.80	354.77	304.81	412.92
63.90	355.32	305.29	413.56
64.00	355.87	305.76	414.20
64.10	356.42	306.23	414.84
64.20	356.97	306.70	415.49
64.30	357.52	307.17	416.13
64.40	358.07	307.65	416.77
64.50	358.63	308.12	417.41
64.60	359.18	308.59	418.05
64.70	359.73	309.06	418.70
64.80	360.28	309.53	419.34
64.90	360.83	310.01	419.98
65.00	361.38	310.48	420.62
65.10	361.93	310.95	421.26
65.20	362.48	311.42	421.90
65.30	363.03	311.89	422.55
65.40	363.58	312.37	423.19
65.50	364.13	312.84	423.83
65.60	364.68	313.31	424.47
65.70	365.23	313.78	425.11
65.80	365.78	314.25	425.75
65.90	366.33	314.73	426.40
66.00	366.88	315.20	427.04
66.10	367.43	315.67	427.68
66.20	367.98	316.14	428.32
66.30	368.53	316.61	428.96
66.40	369.08	317.08	429.60
66.50	369.63	317.56	430.25
66.60	370.18	318.03	430.89
66.70	370.73	318.50	431.53
66.80	371.28	318.97	432.17
66.90	371.83	319.44	432.81
67.00	372.38	319.92	433.45
67.10	372.93	320.39	434.09
67.20	373.48	320.86	434.74
67.30	374.03	321.33	435.38
67.40	374.58	321.80	436.02
67.50	375.13	322.27	436.66
67.60	375.68	322.75	437.30
67.70	376.23	323.22	437.94
67.80	376.78	323.69	438.59
67.90	377.33	324.16	439.23
68.00	377.88	324.63	439.87
68.10	378.43	325.10	440.51
68.20	378.98	325.58	441.15
68.30	379.53	326.05	441.79
68.40	380.08	326.52	442.44
68.50	380.63	326.99	443.08
68.60	381.18	327.46	443.72
68.70	381.73	327.93	444.36
68.80	382.28	328.41	445.00
68.90	382.83	328.88	445.64
69.00	383.38	329.35	446.28
69.10	383.93	329.82	446.93
69.20	384.48	330.29	447.57
69.30	385.03	330.76	448.21
69.40	385.58	331.23	448.85
69.50	386.13	331.71	449.49
69.60	386.68	332.18	450.13
69.70	387.23	332.65	450.78
69.80	387.78	333.12	451.42
69.90	388.33	333.59	452.06
70.00	388.88	334.06	452.70
70.10	389.43	334.53	453.34
70.20	389.98	335.01	453.98
70.30	390.53	335.48	454.62
70.40	391.08	335.95	455.27
70.50	391.63	336.42	455.91
70.60	392.18	336.89	456.55
70.70	392.73	337.36	457.19
70.80	393.28	337.83	457.83
70.90	393.83	338.31	458.47
71.00	394.38	338.78	459.11
71.10	394.93	339.25	459.76
71.20	395.48	339.72	460.40
71.30	396.03	340.19	461.04
71.40	396.58	340.66	461.68
71.50	397.13	341.13	462.32
71.60	397.68	341.60	462.96
71.70	398.23	342.08	463.60
71.80	398.78	342.55	464.25
71.90	399.33	343.02	464.89
72.00	399.88	343.49	465.53
72.10	400.43	343.96	466.17
72.20	400.98	344.43	466.81
72.30	401.53	344.90	467.45
72.40	402.08	345.37	468.09
72.50	402.63	345.85	468.74
72.60	403.18	346.32	469.38
72.70	403.73	346.79	470.02
72.80	404.28	347.26	470.66
72.90	404.83	347.73	471.30
73.00	405.38	348.20	471.94
73.10	405.93	348.67	472.58
73.20	406.48	349.14	473.22
73.30	407.03	349.61	473.87
73.40	407.58	350.09	474.51
73.50	408.13	350.56	475.15
73.60	408.68	351.03	475.79
73.70	409.22	351.50	476.43
73.80	409.77	351.97	477.07
73.90	410.32	352.44	477.71
74.00	410.87	352.91	478.36
74.10	411.42	353.38	479.00
74.20	411.97	353.85	479.64
74.30	412.52	354.32	480.28
74.40	413.07	354.80	480.92
74.50	413.62	355.27	481.56
74.60	414.17	355.74	482.20
74.70	414.72	356.21	482.84
74.80	415.27	356.68	483.49
74.90	415.82	357.15	484.13
75.00	416.37	357.62	484.77
75.10	416.92	358.09	485.41
75.20	417.47	358.56	486.05
75.30	418.02	359.03	486.69
75.40	418.57	359.51	487.33
75.50	419.12	359.98	487.97
75.60	419.67	360.45	488.62
75.70	420.22	360.92	489.26
75.80	420.77	361.39	489.90
75.90	421.31	361.86	490.54
76.00	421.86	362.33	491.18
76.10	422.41	362.80	491.82
76.20	422.96	363.27	492.46
76.30	423.51	363.74	493.10
76.40	424.06	364.21	493.75
76.50	424.61	364.68	494.39
76.60	425.16	365.15	495.03
76.70	425.71	365.63	495.67
76.80	426.26	366.10	496.31
76.90	426.81	366.57	496.95
77.00	427.36	367.04	497.59
77.10	427.91	367.51	498.23
77.20	428.46	367.98	498.88
77.30	429.01	368.45	499.52
77.40	429.56	368.92	500.16
77.50	430.11	369.39	500.80
77.60	430.65	369.86	501.44
77.70	431.20	370.33	502.08
77.80	431.75	370.80	502.72
77.90	432.30	371.27	503.36
78.00	432.85	371.74	504.00
78.10	433.40	372.22	504.65
78.20	433.95	372.69	505.29
78.30	434.50	373.16	505.93
78.40	435.05	373.63	506.57
78.50	435.60	374.10	507.21
78.60	436.15	374.57	507.85
78.70	436.70	375.04	508.49
78.80	437.25	375.51	509.13
78.90	437.80	375.98	509.78
79.00	438.34	376.45	510.42
79.10	438.89	376.92	511.06
79.20	439.44	377.39	511.70
79.30	439.99	377.86	512.34
79.40	440.54	378.33	512.98
79.50	441.09	378.80	513.62
79.60	441.64	379.27	514.26
79.70	442.19	379.74	514.90
79.80	442.74	380.21	515.55
79.90	443.29	380.68	516.19
80.00	443.84	381.15	516.83
80.10	444.39	381.63	517.47
80.20	444.94	382.10	518.11
80.30	445.48	382.57	518.75
80.40	446.03	383.04	519.39
80.50	446.58	383.51	520.03
80.60	447.13	383.98	520.67
80.70	447.68	384.45	521.31
80.80	448.23	384.92	521.96
80.90	448.78	385.39	522.60
81.00	449.33	385.86	523.24
81.10	449.88	386.33	523.88
81.20	450.43	386.80	524.52
81.30	450.98	387.27	525.16
81.40	451.52	387.74	525.80
81.50	452.07	388.21	526.44
81.60	452.62	388.68	527.08
81.70	453.17	389.15	527.73
81.80	453.72	389.62	528.37
81.90	454.27	390.09	529.01
82.00	454.82	390.56	529.65
82.10	455.37	391.03	530.29
82.20	455.92	391.50	530.93
82.30	456.47	391.97	531.57
82.40	457.02	392.44	532.21
82.50	457.56	392.91	532.85
