# Supplementary material
Source: MDPI journal article supplement (https://www.mdpi.com/2504-446X/8/3/115)
Supplement: s1 [file s1 › Table S13 Mecistops leptorhynchus Framework.csv]

Head Length (cm)	Fit (estimation) (cm)	Lower limit (95% confidence interval) (cm)	Upper limit (95% confidence interval) (cm)
2.70	16.36	15.40	17.38
2.80	16.95	15.96	18.00
2.90	17.53	16.51	18.62
3.00	18.12	17.06	19.24
3.10	18.70	17.61	19.86
3.20	19.28	18.16	20.48
3.30	19.87	18.71	21.10
3.40	20.45	19.26	21.71
3.50	21.03	19.80	22.33
3.60	21.61	20.35	22.95
3.70	22.19	20.90	23.56
3.80	22.77	21.45	24.18
3.90	23.35	21.99	24.79
4.00	23.93	22.54	25.40
4.10	24.51	23.08	26.02
4.20	25.08	23.63	26.63
4.30	25.66	24.17	27.24
4.40	26.24	24.72	27.85
4.50	26.81	25.26	28.46
4.60	27.39	25.80	29.07
4.70	27.96	26.34	29.68
4.80	28.54	26.89	30.29
4.90	29.11	27.43	30.90
5.00	29.69	27.97	31.51
5.10	30.26	28.51	32.12
5.20	30.83	29.05	32.73
5.30	31.41	29.59	33.33
5.40	31.98	30.13	33.94
5.50	32.55	30.67	34.55
5.60	33.12	31.21	35.16
5.70	33.70	31.75	35.76
5.80	34.27	32.29	36.37
5.90	34.84	32.83	36.97
6.00	35.41	33.37	37.58
6.10	35.98	33.90	38.18
6.20	36.55	34.44	38.79
6.30	37.12	34.98	39.39
6.40	37.69	35.52	39.99
6.50	38.26	36.05	40.60
6.60	38.83	36.59	41.20
6.70	39.40	37.13	41.80
6.80	39.96	37.66	42.41
6.90	40.53	38.20	43.01
7.00	41.10	38.73	43.61
7.10	41.67	39.27	44.21
7.20	42.23	39.80	44.81
7.30	42.80	40.34	45.42
7.40	43.37	40.87	46.02
7.50	43.93	41.41	46.62
7.60	44.50	41.94	47.22
7.70	45.07	42.47	47.82
7.80	45.63	43.01	48.42
7.90	46.20	43.54	49.02
8.00	46.76	44.07	49.62
8.10	47.33	44.61	50.21
8.20	47.89	45.14	50.81
8.30	48.46	45.67	51.41
8.40	49.02	46.20	52.01
8.50	49.59	46.74	52.61
8.60	50.15	47.27	53.21
8.70	50.71	47.80	53.80
8.80	51.28	48.33	54.40
8.90	51.84	48.86	55.00
9.00	52.40	49.39	55.60
9.10	52.96	49.92	56.19
9.20	53.53	50.45	56.79
9.30	54.09	50.98	57.39
9.40	54.65	51.51	57.98
9.50	55.21	52.04	58.58
9.60	55.78	52.57	59.17
9.70	56.34	53.10	59.77
9.80	56.90	53.63	60.36
9.90	57.46	54.16	60.96
10.00	58.02	54.69	61.55
10.10	58.58	55.22	62.15
10.20	59.14	55.75	62.74
10.30	59.70	56.28	63.34
10.40	60.26	56.80	63.93
10.50	60.82	57.33	64.53
10.60	61.38	57.86	65.12
10.70	61.94	58.39	65.71
10.80	62.50	58.92	66.31
10.90	63.06	59.44	66.90
11.00	63.62	59.97	67.49
11.10	64.18	60.50	68.09
11.20	64.74	61.02	68.68
11.30	65.30	61.55	69.27
11.40	65.86	62.08	69.86
11.50	66.41	62.60	70.46
11.60	66.97	63.13	71.05
11.70	67.53	63.66	71.64
11.80	68.09	64.18	72.23
11.90	68.65	64.71	72.82
12.00	69.20	65.23	73.42
12.10	69.76	65.76	74.01
12.20	70.32	66.28	74.60
12.30	70.88	66.81	75.19
12.40	71.43	67.33	75.78
12.50	71.99	67.86	76.37
12.60	72.55	68.38	76.96
12.70	73.10	68.91	77.55
12.80	73.66	69.43	78.14
12.90	74.22	69.96	78.73
13.00	74.77	70.48	79.32
13.10	75.33	71.01	79.91
13.20	75.88	71.53	80.50
13.30	76.44	72.05	81.09
13.40	76.99	72.58	81.68
13.50	77.55	73.10	82.27
13.60	78.10	73.63	82.86
13.70	78.66	74.15	83.45
13.80	79.21	74.67	84.03
13.90	79.77	75.19	84.62
14.00	80.32	75.72	85.21
14.10	80.88	76.24	85.80
14.20	81.43	76.76	86.39
14.30	81.99	77.29	86.98
14.40	82.54	77.81	87.56
14.50	83.10	78.33	88.15
14.60	83.65	78.85	88.74
14.70	84.20	79.37	89.33
14.80	84.76	79.90	89.91
14.90	85.31	80.42	90.50
15.00	85.86	80.94	91.09
15.10	86.42	81.46	91.68
15.20	86.97	81.98	92.26
15.30	87.52	82.50	92.85
15.40	88.08	83.02	93.44
15.50	88.63	83.55	94.02
15.60	89.18	84.07	94.61
15.70	89.74	84.59	95.20
15.80	90.29	85.11	95.78
15.90	90.84	85.63	96.37
16.00	91.39	86.15	96.95
16.10	91.94	86.67	97.54
16.20	92.50	87.19	98.13
16.30	93.05	87.71	98.71
16.40	93.60	88.23	99.30
16.50	94.15	88.75	99.88
16.60	94.70	89.27	100.47
16.70	95.25	89.79	101.05
16.80	95.81	90.31	101.64
16.90	96.36	90.83	102.22
17.00	96.91	91.35	102.81
17.10	97.46	91.87	103.39
17.20	98.01	92.39	103.98
17.30	98.56	92.91	104.56
17.40	99.11	93.42	105.14
17.50	99.66	93.94	105.73
17.60	100.21	94.46	106.31
17.70	100.76	94.98	106.90
17.80	101.31	95.50	107.48
17.90	101.86	96.02	108.07
18.00	102.41	96.54	108.65
18.10	102.96	97.05	109.23
18.20	103.51	97.57	109.82
18.30	104.06	98.09	110.40
18.40	104.61	98.61	110.98
18.50	105.16	99.13	111.57
18.60	105.71	99.64	112.15
18.70	106.26	100.16	112.73
18.80	106.81	100.68	113.31
18.90	107.36	101.20	113.90
19.00	107.91	101.72	114.48
19.10	108.46	102.23	115.06
19.20	109.01	102.75	115.65
19.30	109.56	103.27	116.23
19.40	110.10	103.78	116.81
19.50	110.65	104.30	117.39
19.60	111.20	104.82	117.97
19.70	111.75	105.33	118.56
19.80	112.30	105.85	119.14
19.90	112.85	106.37	119.72
20.00	113.39	106.88	120.30
20.10	113.94	107.40	120.88
20.20	114.49	107.92	121.47
20.30	115.04	108.43	122.05
20.40	115.59	108.95	122.63
20.50	116.13	109.47	123.21
20.60	116.68	109.98	123.79
20.70	117.23	110.50	124.37
20.80	117.78	111.01	124.95
20.90	118.32	111.53	125.53
21.00	118.87	112.04	126.11
21.10	119.42	112.56	126.70
21.20	119.97	113.07	127.28
21.30	120.51	113.59	127.86
21.40	121.06	114.11	128.44
21.50	121.61	114.62	129.02
21.60	122.15	115.14	129.60
21.70	122.70	115.65	130.18
21.80	123.25	116.17	130.76
21.90	123.79	116.68	131.34
22.00	124.34	117.20	131.92
22.10	124.89	117.71	132.50
22.20	125.43	118.22	133.08
22.30	125.98	118.74	133.66
22.40	126.52	119.25	134.24
22.50	127.07	119.77	134.82
22.60	127.62	120.28	135.40
22.70	128.16	120.80	135.98
22.80	128.71	121.31	136.56
22.90	129.25	121.82	137.13
23.00	129.80	122.34	137.71
23.10	130.34	122.85	138.29
23.20	130.89	123.37	138.87
23.30	131.44	123.88	139.45
23.40	131.98	124.39	140.03
23.50	132.53	124.91	140.61
23.60	133.07	125.42	141.19
23.70	133.62	125.93	141.77
23.80	134.16	126.45	142.34
23.90	134.71	126.96	142.92
24.00	135.25	127.47	143.50
24.10	135.80	127.99	144.08
24.20	136.34	128.50	144.66
24.30	136.88	129.01	145.24
24.40	137.43	129.53	145.81
24.50	137.97	130.04	146.39
24.60	138.52	130.55	146.97
24.70	139.06	131.06	147.55
24.80	139.61	131.58	148.13
24.90	140.15	132.09	148.70
25.00	140.69	132.60	149.28
25.10	141.24	133.11	149.86
25.20	141.78	133.63	150.44
25.30	142.33	134.14	151.01
25.40	142.87	134.65	151.59
25.50	143.41	135.16	152.17
25.60	143.96	135.68	152.75
25.70	144.50	136.19	153.32
25.80	145.04	136.70	153.90
25.90	145.59	137.21	154.48
26.00	146.13	137.72	155.05
26.10	146.67	138.23	155.63
26.20	147.22	138.75	156.21
26.30	147.76	139.26	156.78
26.40	148.30	139.77	157.36
26.50	148.85	140.28	157.94
26.60	149.39	140.79	158.51
26.70	149.93	141.30	159.09
26.80	150.48	141.81	159.67
26.90	151.02	142.33	160.24
27.00	151.56	142.84	160.82
27.10	152.10	143.35	161.39
27.20	152.65	143.86	161.97
27.30	153.19	144.37	162.55
27.40	153.73	144.88	163.12
27.50	154.27	145.39	163.70
27.60	154.82	145.90	164.27
27.70	155.36	146.41	164.85
27.80	155.90	146.92	165.43
27.90	156.44	147.43	166.00
28.00	156.98	147.94	166.58
28.10	157.53	148.45	167.15
28.20	158.07	148.96	167.73
28.30	158.61	149.48	168.30
28.40	159.15	149.99	168.88
28.50	159.69	150.50	169.45
28.60	160.24	151.01	170.03
28.70	160.78	151.52	170.60
28.80	161.32	152.03	171.18
28.90	161.86	152.54	171.75
29.00	162.40	153.05	172.33
29.10	162.94	153.56	172.90
29.20	163.48	154.06	173.48
29.30	164.03	154.57	174.05
29.40	164.57	155.08	174.63
29.50	165.11	155.59	175.20
29.60	165.65	156.10	175.78
29.70	166.19	156.61	176.35
29.80	166.73	157.12	176.93
29.90	167.27	157.63	177.50
30.00	167.81	158.14	178.08
30.10	168.35	158.65	178.65
30.20	168.89	159.16	179.22
30.30	169.43	159.67	179.80
30.40	169.97	160.18	180.37
30.50	170.51	160.69	180.95
30.60	171.06	161.19	181.52
30.70	171.60	161.70	182.09
30.80	172.14	162.21	182.67
30.90	172.68	162.72	183.24
31.00	173.22	163.23	183.81
31.10	173.76	163.74	184.39
31.20	174.30	164.25	184.96
31.30	174.84	164.75	185.54
31.40	175.38	165.26	186.11
31.50	175.92	165.77	186.68
31.60	176.46	166.28	187.26
31.70	177.00	166.79	187.83
31.80	177.54	167.30	188.40
31.90	178.08	167.80	188.98
32.00	178.62	168.31	189.55
32.10	179.15	168.82	190.12
32.20	179.69	169.33	190.70
32.30	180.23	169.84	191.27
32.40	180.77	170.34	191.84
32.50	181.31	170.85	192.41
32.60	181.85	171.36	192.99
32.70	182.39	171.87	193.56
32.80	182.93	172.37	194.13
32.90	183.47	172.88	194.70
33.00	184.01	173.39	195.28
33.10	184.55	173.90	195.85
33.20	185.09	174.40	196.42
33.30	185.63	174.91	196.99
33.40	186.16	175.42	197.57
33.50	186.70	175.93	198.14
33.60	187.24	176.43	198.71
33.70	187.78	176.94	199.28
33.80	188.32	177.45	199.86
33.90	188.86	177.95	200.43
34.00	189.40	178.46	201.00
34.10	189.93	178.97	201.57
34.20	190.47	179.48	202.14
34.30	191.01	179.98	202.72
34.40	191.55	180.49	203.29
34.50	192.09	181.00	203.86
34.60	192.63	181.50	204.43
34.70	193.16	182.01	205.00
34.80	193.70	182.52	205.57
34.90	194.24	183.02	206.15
35.00	194.78	183.53	206.72
35.10	195.32	184.03	207.29
35.20	195.85	184.54	207.86
35.30	196.39	185.05	208.43
35.40	196.93	185.55	209.00
35.50	197.47	186.06	209.57
35.60	198.01	186.57	210.15
35.70	198.54	187.07	210.72
35.80	199.08	187.58	211.29
35.90	199.62	188.08	211.86
36.00	200.16	188.59	212.43
36.10	200.69	189.10	213.00
36.20	201.23	189.60	213.57
36.30	201.77	190.11	214.14
36.40	202.31	190.61	214.71
36.50	202.84	191.12	215.28
36.60	203.38	191.62	215.86
36.70	203.92	192.13	216.43
36.80	204.45	192.64	217.00
36.90	204.99	193.14	217.57
37.00	205.53	193.65	218.14
37.10	206.07	194.15	218.71
37.20	206.60	194.66	219.28
37.30	207.14	195.16	219.85
37.40	207.68	195.67	220.42
37.50	208.21	196.17	220.99
37.60	208.75	196.68	221.56
37.70	209.29	197.18	222.13
37.80	209.82	197.69	222.70
37.90	210.36	198.19	223.27
38.00	210.90	198.70	223.84
38.10	211.43	199.20	224.41
38.20	211.97	199.71	224.98
38.30	212.50	200.21	225.55
38.40	213.04	200.72	226.12
38.50	213.58	201.22	226.69
38.60	214.11	201.73	227.26
38.70	214.65	202.23	227.83
38.80	215.19	202.74	228.40
38.90	215.72	203.24	228.97
39.00	216.26	203.75	229.54
39.10	216.79	204.25	230.11
39.20	217.33	204.76	230.68
39.30	217.87	205.26	231.25
39.40	218.40	205.76	231.82
39.50	218.94	206.27	232.39
39.60	219.47	206.77	232.96
39.70	220.01	207.28	233.52
39.80	220.55	207.78	234.09
39.90	221.08	208.28	234.66
40.00	221.62	208.79	235.23
40.10	222.15	209.29	235.80
40.20	222.69	209.80	236.37
40.30	223.22	210.30	236.94
40.40	223.76	210.80	237.51
40.50	224.29	211.31	238.08
40.60	224.83	211.81	238.65
40.70	225.36	212.32	239.22
40.80	225.90	212.82	239.78
40.90	226.44	213.32	240.35
41.00	226.97	213.83	240.92
41.10	227.51	214.33	241.49
41.20	228.04	214.83	242.06
41.30	228.58	215.34	242.63
41.40	229.11	215.84	243.20
41.50	229.65	216.34	243.76
41.60	230.18	216.85	244.33
41.70	230.72	217.35	244.90
41.80	231.25	217.85	245.47
41.90	231.79	218.36	246.04
42.00	232.32	218.86	246.61
42.10	232.85	219.36	247.17
42.20	233.39	219.87	247.74
42.30	233.92	220.37	248.31
42.40	234.46	220.87	248.88
42.50	234.99	221.38	249.45
42.60	235.53	221.88	250.02
42.70	236.06	222.38	250.58
42.80	236.60	222.89	251.15
42.90	237.13	223.39	251.72
43.00	237.67	223.89	252.29
43.10	238.20	224.39	252.85
43.20	238.73	224.90	253.42
43.30	239.27	225.40	253.99
43.40	239.80	225.90	254.56
43.50	240.34	226.40	255.13
43.60	240.87	226.91	255.69
43.70	241.40	227.41	256.26
43.80	241.94	227.91	256.83
43.90	242.47	228.41	257.40
44.00	243.01	228.92	257.96
44.10	243.54	229.42	258.53
44.20	244.07	229.92	259.10
44.30	244.61	230.42	259.67
44.40	245.14	230.93	260.23
44.50	245.68	231.43	260.80
44.60	246.21	231.93	261.37
44.70	246.74	232.43	261.93
44.80	247.28	232.93	262.50
44.90	247.81	233.44	263.07
45.00	248.34	233.94	263.64
45.10	248.88	234.44	264.20
45.20	249.41	234.94	264.77
45.30	249.94	235.44	265.34
45.40	250.48	235.95	265.90
45.50	251.01	236.45	266.47
45.60	251.54	236.95	267.04
45.70	252.08	237.45	267.60
45.80	252.61	237.95	268.17
45.90	253.14	238.45	268.74
46.00	253.68	238.96	269.30
46.10	254.21	239.46	269.87
46.20	254.74	239.96	270.44
46.30	255.28	240.46	271.00
46.40	255.81	240.96	271.57
46.50	256.34	241.46	272.14
46.60	256.87	241.96	272.70
46.70	257.41	242.47	273.27
46.80	257.94	242.97	273.84
46.90	258.47	243.47	274.40
47.00	259.01	243.97	274.97
47.10	259.54	244.47	275.53
47.20	260.07	244.97	276.10
47.30	260.60	245.47	276.67
47.40	261.14	245.97	277.23
47.50	261.67	246.47	277.80
47.60	262.20	246.98	278.37
47.70	262.73	247.48	278.93
47.80	263.27	247.98	279.50
47.90	263.80	248.48	280.06
48.00	264.33	248.98	280.63
48.10	264.86	249.48	281.20
48.20	265.40	249.98	281.76
48.30	265.93	250.48	282.33
48.40	266.46	250.98	282.89
48.50	266.99	251.48	283.46
48.60	267.52	251.98	284.02
48.70	268.06	252.48	284.59
48.80	268.59	252.98	285.16
48.90	269.12	253.48	285.72
49.00	269.65	253.98	286.29
49.10	270.18	254.49	286.85
49.20	270.72	254.99	287.42
49.30	271.25	255.49	287.98
49.40	271.78	255.99	288.55
49.50	272.31	256.49	289.11
49.60	272.84	256.99	289.68
49.70	273.38	257.49	290.24
49.80	273.91	257.99	290.81
49.90	274.44	258.49	291.38
50.00	274.97	258.99	291.94
50.10	275.50	259.49	292.51
50.20	276.03	259.99	293.07
50.30	276.57	260.49	293.64
50.40	277.10	260.99	294.20
50.50	277.63	261.49	294.77
50.60	278.16	261.99	295.33
50.70	278.69	262.49	295.90
50.80	279.22	262.99	296.46
50.90	279.75	263.49	297.03
51.00	280.29	263.99	297.59
51.10	280.82	264.49	298.16
51.20	281.35	264.99	298.72
51.30	281.88	265.49	299.28
51.40	282.41	265.98	299.85
51.50	282.94	266.48	300.41
51.60	283.47	266.98	300.98
51.70	284.00	267.48	301.54
51.80	284.53	267.98	302.11
51.90	285.07	268.48	302.67
52.00	285.60	268.98	303.24
52.10	286.13	269.48	303.80
52.20	286.66	269.98	304.37
52.30	287.19	270.48	304.93
52.40	287.72	270.98	305.50
52.50	288.25	271.48	306.06
52.60	288.78	271.98	306.62
52.70	289.31	272.48	307.19
52.80	289.84	272.98	307.75
52.90	290.37	273.47	308.32
53.00	290.90	273.97	308.88
53.10	291.43	274.47	309.44
53.20	291.97	274.97	310.01
53.30	292.50	275.47	310.57
53.40	293.03	275.97	311.14
53.50	293.56	276.47	311.70
53.60	294.09	276.97	312.27
53.70	294.62	277.47	312.83
53.80	295.15	277.97	313.39
53.90	295.68	278.46	313.96
54.00	296.21	278.96	314.52
54.10	296.74	279.46	315.08
54.20	297.27	279.96	315.65
54.30	297.80	280.46	316.21
54.40	298.33	280.96	316.78
54.50	298.86	281.46	317.34
54.60	299.39	281.95	317.90
54.70	299.92	282.45	318.47
54.80	300.45	282.95	319.03
54.90	300.98	283.45	319.59
55.00	301.51	283.95	320.16
55.10	302.04	284.45	320.72
55.20	302.57	284.94	321.28
55.30	303.10	285.44	321.85
55.40	303.63	285.94	322.41
55.50	304.16	286.44	322.97
55.60	304.69	286.94	323.54
55.70	305.22	287.44	324.10
55.80	305.75	287.93	324.66
55.90	306.28	288.43	325.23
56.00	306.81	288.93	325.79
56.10	307.34	289.43	326.35
56.20	307.87	289.93	326.92
56.30	308.40	290.42	327.48
56.40	308.93	290.92	328.04
56.50	309.46	291.42	328.61
56.60	309.98	291.92	329.17
56.70	310.51	292.42	329.73
56.80	311.04	292.91	330.30
56.90	311.57	293.41	330.86
57.00	312.10	293.91	331.42
57.10	312.63	294.41	331.98
57.20	313.16	294.90	332.55
57.30	313.69	295.40	333.11
57.40	314.22	295.90	333.67
57.50	314.75	296.40	334.24
57.60	315.28	296.89	334.80
57.70	315.81	297.39	335.36
57.80	316.34	297.89	335.92
57.90	316.86	298.39	336.49
58.00	317.39	298.88	337.05
58.10	317.92	299.38	337.61
58.20	318.45	299.88	338.17
58.30	318.98	300.38	338.74
58.40	319.51	300.87	339.30
58.50	320.04	301.37	339.86
58.60	320.57	301.87	340.42
58.70	321.10	302.37	340.99
58.80	321.63	302.86	341.55
58.90	322.15	303.36	342.11
59.00	322.68	303.86	342.67
59.10	323.21	304.35	343.24
59.20	323.74	304.85	343.80
59.30	324.27	305.35	344.36
59.40	324.80	305.85	344.92
59.50	325.33	306.34	345.48
59.60	325.85	306.84	346.05
59.70	326.38	307.34	346.61
59.80	326.91	307.83	347.17
59.90	327.44	308.33	347.73
60.00	327.97	308.83	348.30
60.10	328.50	309.32	348.86
60.20	329.03	309.82	349.42
60.30	329.55	310.32	349.98
60.40	330.08	310.81	350.54
60.50	330.61	311.31	351.10
60.60	331.14	311.81	351.67
60.70	331.67	312.30	352.23
60.80	332.19	312.80	352.79
60.90	332.72	313.30	353.35
61.00	333.25	313.79	353.91
61.10	333.78	314.29	354.48
61.20	334.31	314.79	355.04
61.30	334.84	315.28	355.60
61.40	335.36	315.78	356.16
61.50	335.89	316.28	356.72
61.60	336.42	316.77	357.28
61.70	336.95	317.27	357.85
61.80	337.48	317.77	358.41
61.90	338.00	318.26	358.97
62.00	338.53	318.76	359.53
62.10	339.06	319.25	360.09
62.20	339.59	319.75	360.65
62.30	340.11	320.25	361.21
62.40	340.64	320.74	361.78
62.50	341.17	321.24	362.34
62.60	341.70	321.74	362.90
62.70	342.23	322.23	363.46
62.80	342.75	322.73	364.02
62.90	343.28	323.22	364.58
63.00	343.81	323.72	365.14
63.10	344.34	324.22	365.70
63.20	344.86	324.71	366.27
63.30	345.39	325.21	366.83
63.40	345.92	325.70	367.39
63.50	346.45	326.20	367.95
63.60	346.97	326.69	368.51
63.70	347.50	327.19	369.07
63.80	348.03	327.69	369.63
63.90	348.55	328.18	370.19
64.00	349.08	328.68	370.75
64.10	349.61	329.17	371.31
64.20	350.14	329.67	371.87
64.30	350.66	330.16	372.44
64.40	351.19	330.66	373.00
64.50	351.72	331.16	373.56
64.60	352.25	331.65	374.12
64.70	352.77	332.15	374.68
64.80	353.30	332.64	375.24
64.90	353.83	333.14	375.80
65.00	354.35	333.63	376.36
65.10	354.88	334.13	376.92
65.20	355.41	334.62	377.48
65.30	355.93	335.12	378.04
65.40	356.46	335.61	378.60
65.50	356.99	336.11	379.16
65.60	357.52	336.61	379.72
65.70	358.04	337.10	380.28
65.80	358.57	337.60	380.84
65.90	359.10	338.09	381.41
66.00	359.62	338.59	381.97
66.10	360.15	339.08	382.53
66.20	360.68	339.58	383.09
66.30	361.20	340.07	383.65
66.40	361.73	340.57	384.21
66.50	362.26	341.06	384.77
66.60	362.78	341.56	385.33
66.70	363.31	342.05	385.89
66.80	363.84	342.55	386.45
66.90	364.36	343.04	387.01
67.00	364.89	343.54	387.57
67.10	365.41	344.03	388.13
67.20	365.94	344.53	388.69
67.30	366.47	345.02	389.25
67.40	366.99	345.52	389.81
67.50	367.52	346.01	390.37
67.60	368.05	346.50	390.93
67.70	368.57	347.00	391.49
67.80	369.10	347.49	392.05
67.90	369.63	347.99	392.61
68.00	370.15	348.48	393.17
68.10	370.68	348.98	393.73
68.20	371.20	349.47	394.29
68.30	371.73	349.97	394.85
68.40	372.26	350.46	395.41
68.50	372.78	350.96	395.97
68.60	373.31	351.45	396.53
68.70	373.83	351.95	397.09
68.80	374.36	352.44	397.65
68.90	374.89	352.93	398.21
69.00	375.41	353.43	398.76
69.10	375.94	353.92	399.32
69.20	376.46	354.42	399.88
69.30	376.99	354.91	400.44
69.40	377.52	355.41	401.00
69.50	378.04	355.90	401.56
69.60	378.57	356.39	402.12
69.70	379.09	356.89	402.68
69.80	379.62	357.38	403.24
69.90	380.15	357.88	403.80
70.00	380.67	358.37	404.36
70.10	381.20	358.86	404.92
70.20	381.72	359.36	405.48
70.30	382.25	359.85	406.04
70.40	382.77	360.35	406.60
70.50	383.30	360.84	407.16
70.60	383.83	361.33	407.72
70.70	384.35	361.83	408.27
70.80	384.88	362.32	408.83
70.90	385.40	362.82	409.39
71.00	385.93	363.31	409.95
71.10	386.45	363.80	410.51
71.20	386.98	364.30	411.07
71.30	387.50	364.79	411.63
71.40	388.03	365.29	412.19
71.50	388.55	365.78	412.75
71.60	389.08	366.27	413.31
71.70	389.60	366.77	413.87
71.80	390.13	367.26	414.42
71.90	390.66	367.75	414.98
72.00	391.18	368.25	415.54
72.10	391.71	368.74	416.10
72.20	392.23	369.23	416.66
72.30	392.76	369.73	417.22
72.40	393.28	370.22	417.78
72.50	393.81	370.72	418.34
72.60	394.33	371.21	418.89
72.70	394.86	371.70	419.45
72.80	395.38	372.20	420.01
72.90	395.91	372.69	420.57
73.00	396.43	373.18	421.13
73.10	396.96	373.68	421.69
73.20	397.48	374.17	422.25
73.30	398.01	374.66	422.81
73.40	398.53	375.16	423.36
73.50	399.06	375.65	423.92
73.60	399.58	376.14	424.48
73.70	400.11	376.64	425.04
73.80	400.63	377.13	425.60
73.90	401.16	377.62	426.16
74.00	401.68	378.11	426.71
74.10	402.20	378.61	427.27
74.20	402.73	379.10	427.83
74.30	403.25	379.59	428.39
74.40	403.78	380.09	428.95
74.50	404.30	380.58	429.51
74.60	404.83	381.07	430.06
74.70	405.35	381.57	430.62
74.80	405.88	382.06	431.18
74.90	406.40	382.55	431.74
75.00	406.93	383.04	432.30
75.10	407.45	383.54	432.86
75.20	407.98	384.03	433.41
75.30	408.50	384.52	433.97
75.40	409.02	385.02	434.53
75.50	409.55	385.51	435.09
75.60	410.07	386.00	435.65
75.70	410.60	386.49	436.20
75.80	411.12	386.99	436.76
75.90	411.65	387.48	437.32
76.00	412.17	387.97	437.88
76.10	412.69	388.46	438.44
76.20	413.22	388.96	438.99
76.30	413.74	389.45	439.55
76.40	414.27	389.94	440.11
76.50	414.79	390.44	440.67
76.60	415.32	390.93	441.23
76.70	415.84	391.42	441.78
76.80	416.36	391.91	442.34
76.90	416.89	392.40	442.90
77.00	417.41	392.90	443.46
77.10	417.94	393.39	444.01
77.20	418.46	393.88	444.57
77.30	418.98	394.37	445.13
77.40	419.51	394.87	445.69
77.50	420.03	395.36	446.24
77.60	420.56	395.85	446.80
77.70	421.08	396.34	447.36
77.80	421.60	396.84	447.92
77.90	422.13	397.33	448.47
78.00	422.65	397.82	449.03
78.10	423.18	398.31	449.59
78.20	423.70	398.80	450.15
78.30	424.22	399.30	450.70
78.40	424.75	399.79	451.26
78.50	425.27	400.28	451.82
78.60	425.79	400.77	452.38
78.70	426.32	401.27	452.93
78.80	426.84	401.76	453.49
78.90	427.36	402.25	454.05
79.00	427.89	402.74	454.61
79.10	428.41	403.23	455.16
79.20	428.94	403.72	455.72
79.30	429.46	404.22	456.28
79.40	429.98	404.71	456.84
79.50	430.51	405.20	457.39
79.60	431.03	405.69	457.95
79.70	431.55	406.18	458.51
79.80	432.08	406.68	459.06
79.90	432.60	407.17	459.62
80.00	433.12	407.66	460.18
80.10	433.65	408.15	460.73
80.20	434.17	408.64	461.29
80.30	434.69	409.13	461.85
80.40	435.22	409.63	462.41
80.50	435.74	410.12	462.96
80.60	436.26	410.61	463.52
80.70	436.79	411.10	464.08
80.80	437.31	411.59	464.63
80.90	437.83	412.08	465.19
81.00	438.36	412.58	465.75
81.10	438.88	413.07	466.30
81.20	439.40	413.56	466.86
81.30	439.93	414.05	467.42
81.40	440.45	414.54	467.97
81.50	440.97	415.03	468.53
81.60	441.49	415.52	469.09
81.70	442.02	416.02	469.64
81.80	442.54	416.51	470.20
81.90	443.06	417.00	470.76
82.00	443.59	417.49	471.31
82.10	444.11	417.98	471.87
82.20	444.63	418.47	472.43
82.30	445.16	418.96	472.98
82.40	445.68	419.45	473.54
82.50	446.20	419.95	474.10
