# Supplementary material
Source: MDPI journal article supplement (https://www.mdpi.com/2504-446X/8/3/115)
Supplement: s1 [file s1 › Table S14 Melanosuchus niger Framework.csv]

Head Length (cm)	Fit (estimation) (cm)	Lower limit (95% confidence interval) (cm)	Upper limit (95% confidence interval) (cm)
2.70	20.44	18.20	22.95
2.80	21.20	18.89	23.81
2.90	21.97	19.57	24.66
3.00	22.73	20.25	25.52
3.10	23.50	20.93	26.38
3.20	24.26	21.62	27.23
3.30	25.03	22.30	28.09
3.40	25.79	22.98	28.95
3.50	26.56	23.67	29.80
3.60	27.32	24.35	30.66
3.70	28.09	25.04	31.52
3.80	28.86	25.72	32.37
3.90	29.62	26.40	33.23
4.00	30.39	27.09	34.09
4.10	31.16	27.77	34.95
4.20	31.92	28.46	35.81
4.30	32.69	29.14	36.66
4.40	33.46	29.83	37.52
4.50	34.22	30.52	38.38
4.60	34.99	31.20	39.24
4.70	35.76	31.89	40.10
4.80	36.53	32.57	40.96
4.90	37.29	33.26	41.82
5.00	38.06	33.94	42.68
5.10	38.83	34.63	43.54
5.20	39.60	35.32	44.40
5.30	40.37	36.00	45.26
5.40	41.13	36.69	46.12
5.50	41.90	37.38	46.98
5.60	42.67	38.06	47.84
5.70	43.44	38.75	48.70
5.80	44.21	39.44	49.56
5.90	44.98	40.13	50.42
6.00	45.75	40.81	51.28
6.10	46.52	41.50	52.14
6.20	47.29	42.19	53.00
6.30	48.06	42.87	53.86
6.40	48.83	43.56	54.73
6.50	49.60	44.25	55.59
6.60	50.37	44.94	56.45
6.70	51.14	45.63	57.31
6.80	51.91	46.31	58.17
6.90	52.68	47.00	59.03
7.00	53.45	47.69	59.90
7.10	54.22	48.38	60.76
7.20	54.99	49.07	61.62
7.30	55.76	49.76	62.48
7.40	56.53	50.44	63.35
7.50	57.30	51.13	64.21
7.60	58.07	51.82	65.07
7.70	58.84	52.51	65.94
7.80	59.61	53.20	66.80
7.90	60.38	53.89	67.66
8.00	61.15	54.58	68.52
8.10	61.93	55.27	69.39
8.20	62.70	55.95	70.25
8.30	63.47	56.64	71.12
8.40	64.24	57.33	71.98
8.50	65.01	58.02	72.84
8.60	65.78	58.71	73.71
8.70	66.55	59.40	74.57
8.80	67.33	60.09	75.43
8.90	68.10	60.78	76.30
9.00	68.87	61.47	77.16
9.10	69.64	62.16	78.03
9.20	70.42	62.85	78.89
9.30	71.19	63.54	79.76
9.40	71.96	64.23	80.62
9.50	72.73	64.92	81.49
9.60	73.50	65.61	82.35
9.70	74.28	66.30	83.22
9.80	75.05	66.99	84.08
9.90	75.82	67.68	84.95
10.00	76.59	68.37	85.81
10.10	77.37	69.06	86.68
10.20	78.14	69.75	87.54
10.30	78.91	70.44	88.41
10.40	79.69	71.13	89.27
10.50	80.46	71.82	90.14
10.60	81.23	72.51	91.00
10.70	82.01	73.20	91.87
10.80	82.78	73.89	92.73
10.90	83.55	74.58	93.60
11.00	84.33	75.27	94.47
11.10	85.10	75.96	95.33
11.20	85.87	76.66	96.20
11.30	86.65	77.35	97.07
11.40	87.42	78.04	97.93
11.50	88.19	78.73	98.80
11.60	88.97	79.42	99.66
11.70	89.74	80.11	100.53
11.80	90.52	80.80	101.40
11.90	91.29	81.49	102.26
12.00	92.06	82.18	103.13
12.10	92.84	82.87	104.00
12.20	93.61	83.57	104.86
12.30	94.39	84.26	105.73
12.40	95.16	84.95	106.60
12.50	95.93	85.64	107.47
12.60	96.71	86.33	108.33
12.70	97.48	87.02	109.20
12.80	98.26	87.71	110.07
12.90	99.03	88.41	110.94
13.00	99.81	89.10	111.80
13.10	100.58	89.79	112.67
13.20	101.36	90.48	113.54
13.30	102.13	91.17	114.41
13.40	102.91	91.86	115.27
13.50	103.68	92.56	116.14
13.60	104.46	93.25	117.01
13.70	105.23	93.94	117.88
13.80	106.01	94.63	118.75
13.90	106.78	95.32	119.61
14.00	107.56	96.02	120.48
14.10	108.33	96.71	121.35
14.20	109.11	97.40	122.22
14.30	109.88	98.09	123.09
14.40	110.66	98.78	123.95
14.50	111.43	99.48	124.82
14.60	112.21	100.17	125.69
14.70	112.98	100.86	126.56
14.80	113.76	101.55	127.43
14.90	114.53	102.24	128.30
15.00	115.31	102.94	129.17
15.10	116.08	103.63	130.04
15.20	116.86	104.32	130.90
15.30	117.64	105.01	131.77
15.40	118.41	105.71	132.64
15.50	119.19	106.40	133.51
15.60	119.96	107.09	134.38
15.70	120.74	107.78	135.25
15.80	121.51	108.48	136.12
15.90	122.29	109.17	136.99
16.00	123.07	109.86	137.86
16.10	123.84	110.55	138.73
16.20	124.62	111.25	139.60
16.30	125.39	111.94	140.47
16.40	126.17	112.63	141.34
16.50	126.95	113.33	142.21
16.60	127.72	114.02	143.08
16.70	128.50	114.71	143.95
16.80	129.28	115.40	144.82
16.90	130.05	116.10	145.69
17.00	130.83	116.79	146.56
17.10	131.61	117.48	147.43
17.20	132.38	118.18	148.30
17.30	133.16	118.87	149.17
17.40	133.93	119.56	150.04
17.50	134.71	120.25	150.91
17.60	135.49	120.95	151.78
17.70	136.26	121.64	152.65
17.80	137.04	122.33	153.52
17.90	137.82	123.03	154.39
18.00	138.60	123.72	155.26
18.10	139.37	124.41	156.13
18.20	140.15	125.11	157.00
18.30	140.93	125.80	157.87
18.40	141.70	126.49	158.74
18.50	142.48	127.19	159.61
18.60	143.26	127.88	160.48
18.70	144.03	128.57	161.35
18.80	144.81	129.27	162.23
18.90	145.59	129.96	163.10
19.00	146.37	130.65	163.97
19.10	147.14	131.35	164.84
19.20	147.92	132.04	165.71
19.30	148.70	132.73	166.58
19.40	149.47	133.43	167.45
19.50	150.25	134.12	168.32
19.60	151.03	134.81	169.20
19.70	151.81	135.51	170.07
19.80	152.58	136.20	170.94
19.90	153.36	136.90	171.81
20.00	154.14	137.59	172.68
20.10	154.92	138.28	173.55
20.20	155.69	138.98	174.42
20.30	156.47	139.67	175.30
20.40	157.25	140.36	176.17
20.50	158.03	141.06	177.04
20.60	158.81	141.75	177.91
20.70	159.58	142.45	178.78
20.80	160.36	143.14	179.66
20.90	161.14	143.83	180.53
21.00	161.92	144.53	181.40
21.10	162.69	145.22	182.27
21.20	163.47	145.91	183.14
21.30	164.25	146.61	184.02
21.40	165.03	147.30	184.89
21.50	165.81	148.00	185.76
21.60	166.58	148.69	186.63
21.70	167.36	149.38	187.51
21.80	168.14	150.08	188.38
21.90	168.92	150.77	189.25
22.00	169.70	151.47	190.12
22.10	170.48	152.16	191.00
22.20	171.25	152.85	191.87
22.30	172.03	153.55	192.74
22.40	172.81	154.24	193.61
22.50	173.59	154.94	194.49
22.60	174.37	155.63	195.36
22.70	175.15	156.33	196.23
22.80	175.92	157.02	197.10
22.90	176.70	157.71	197.98
23.00	177.48	158.41	198.85
23.10	178.26	159.10	199.72
23.20	179.04	159.80	200.60
23.30	179.82	160.49	201.47
23.40	180.60	161.19	202.34
23.50	181.37	161.88	203.22
23.60	182.15	162.57	204.09
23.70	182.93	163.27	204.96
23.80	183.71	163.96	205.84
23.90	184.49	164.66	206.71
24.00	185.27	165.35	207.58
24.10	186.05	166.05	208.46
24.20	186.83	166.74	209.33
24.30	187.60	167.44	210.20
24.40	188.38	168.13	211.08
24.50	189.16	168.83	211.95
24.60	189.94	169.52	212.82
24.70	190.72	170.21	213.70
24.80	191.50	170.91	214.57
24.90	192.28	171.60	215.45
25.00	193.06	172.30	216.32
25.10	193.84	172.99	217.19
25.20	194.62	173.69	218.07
25.30	195.40	174.38	218.94
25.40	196.17	175.08	219.81
25.50	196.95	175.77	220.69
25.60	197.73	176.47	221.56
25.70	198.51	177.16	222.44
25.80	199.29	177.86	223.31
25.90	200.07	178.55	224.18
26.00	200.85	179.25	225.06
26.10	201.63	179.94	225.93
26.20	202.41	180.64	226.81
26.30	203.19	181.33	227.68
26.40	203.97	182.03	228.56
26.50	204.75	182.72	229.43
26.60	205.53	183.42	230.31
26.70	206.31	184.11	231.18
26.80	207.09	184.81	232.05
26.90	207.87	185.50	232.93
27.00	208.65	186.20	233.80
27.10	209.43	186.89	234.68
27.20	210.21	187.59	235.55
27.30	210.98	188.28	236.43
27.40	211.76	188.98	237.30
27.50	212.54	189.67	238.18
27.60	213.32	190.37	239.05
27.70	214.10	191.06	239.93
27.80	214.88	191.76	240.80
27.90	215.66	192.45	241.68
28.00	216.44	193.15	242.55
28.10	217.22	193.84	243.43
28.20	218.00	194.54	244.30
28.30	218.78	195.23	245.18
28.40	219.56	195.93	246.05
28.50	220.34	196.62	246.93
28.60	221.12	197.32	247.80
28.70	221.90	198.01	248.68
28.80	222.68	198.71	249.55
28.90	223.46	199.40	250.43
29.00	224.24	200.10	251.30
29.10	225.02	200.79	252.18
29.20	225.80	201.49	253.05
29.30	226.58	202.18	253.93
29.40	227.36	202.88	254.80
29.50	228.14	203.57	255.68
29.60	228.93	204.27	256.56
29.70	229.71	204.97	257.43
29.80	230.49	205.66	258.31
29.90	231.27	206.36	259.18
30.00	232.05	207.05	260.06
30.10	232.83	207.75	260.93
30.20	233.61	208.44	261.81
30.30	234.39	209.14	262.69
30.40	235.17	209.83	263.56
30.50	235.95	210.53	264.44
30.60	236.73	211.22	265.31
30.70	237.51	211.92	266.19
30.80	238.29	212.62	267.07
30.90	239.07	213.31	267.94
31.00	239.85	214.01	268.82
31.10	240.63	214.70	269.69
31.20	241.41	215.40	270.57
31.30	242.19	216.09	271.45
31.40	242.97	216.79	272.32
31.50	243.75	217.48	273.20
31.60	244.54	218.18	274.07
31.70	245.32	218.88	274.95
31.80	246.10	219.57	275.83
31.90	246.88	220.27	276.70
32.00	247.66	220.96	277.58
32.10	248.44	221.66	278.46
32.20	249.22	222.35	279.33
32.30	250.00	223.05	280.21
32.40	250.78	223.75	281.09
32.50	251.56	224.44	281.96
32.60	252.34	225.14	282.84
32.70	253.13	225.83	283.72
32.80	253.91	226.53	284.59
32.90	254.69	227.22	285.47
33.00	255.47	227.92	286.35
33.10	256.25	228.62	287.22
33.20	257.03	229.31	288.10
33.30	257.81	230.01	288.98
33.40	258.59	230.70	289.85
33.50	259.37	231.40	290.73
33.60	260.15	232.10	291.61
33.70	260.94	232.79	292.48
33.80	261.72	233.49	293.36
33.90	262.50	234.18	294.24
34.00	263.28	234.88	295.11
34.10	264.06	235.58	295.99
34.20	264.84	236.27	296.87
34.30	265.62	236.97	297.75
34.40	266.40	237.66	298.62
34.50	267.19	238.36	299.50
34.60	267.97	239.06	300.38
34.70	268.75	239.75	301.25
34.80	269.53	240.45	302.13
34.90	270.31	241.14	303.01
35.00	271.09	241.84	303.89
35.10	271.87	242.54	304.76
35.20	272.66	243.23	305.64
35.30	273.44	243.93	306.52
35.40	274.22	244.62	307.40
35.50	275.00	245.32	308.27
35.60	275.78	246.02	309.15
35.70	276.56	246.71	310.03
35.80	277.35	247.41	310.91
35.90	278.13	248.10	311.78
36.00	278.91	248.80	312.66
36.10	279.69	249.50	313.54
36.20	280.47	250.19	314.42
36.30	281.25	250.89	315.29
36.40	282.04	251.59	316.17
36.50	282.82	252.28	317.05
36.60	283.60	252.98	317.93
36.70	284.38	253.67	318.80
36.80	285.16	254.37	319.68
36.90	285.94	255.07	320.56
37.00	286.73	255.76	321.44
37.10	287.51	256.46	322.32
37.20	288.29	257.16	323.19
37.30	289.07	257.85	324.07
37.40	289.85	258.55	324.95
37.50	290.64	259.24	325.83
37.60	291.42	259.94	326.71
37.70	292.20	260.64	327.58
37.80	292.98	261.33	328.46
37.90	293.76	262.03	329.34
38.00	294.55	262.73	330.22
38.10	295.33	263.42	331.10
38.20	296.11	264.12	331.98
38.30	296.89	264.81	332.85
38.40	297.67	265.51	333.73
38.50	298.46	266.21	334.61
38.60	299.24	266.90	335.49
38.70	300.02	267.60	336.37
38.80	300.80	268.30	337.25
38.90	301.58	268.99	338.12
39.00	302.37	269.69	339.00
39.10	303.15	270.39	339.88
39.20	303.93	271.08	340.76
39.30	304.71	271.78	341.64
39.40	305.50	272.48	342.52
39.50	306.28	273.17	343.40
39.60	307.06	273.87	344.27
39.70	307.84	274.57	345.15
39.80	308.63	275.26	346.03
39.90	309.41	275.96	346.91
40.00	310.19	276.66	347.79
40.10	310.97	277.35	348.67
40.20	311.75	278.05	349.55
40.30	312.54	278.74	350.43
40.40	313.32	279.44	351.30
40.50	314.10	280.14	352.18
40.60	314.88	280.83	353.06
40.70	315.67	281.53	353.94
40.80	316.45	282.23	354.82
40.90	317.23	282.92	355.70
41.00	318.01	283.62	356.58
41.10	318.80	284.32	357.46
41.20	319.58	285.01	358.34
41.30	320.36	285.71	359.22
41.40	321.14	286.41	360.10
41.50	321.93	287.10	360.97
41.60	322.71	287.80	361.85
41.70	323.49	288.50	362.73
41.80	324.28	289.19	363.61
41.90	325.06	289.89	364.49
42.00	325.84	290.59	365.37
42.10	326.62	291.28	366.25
42.20	327.41	291.98	367.13
42.30	328.19	292.68	368.01
42.40	328.97	293.38	368.89
42.50	329.75	294.07	369.77
42.60	330.54	294.77	370.65
42.70	331.32	295.47	371.53
42.80	332.10	296.16	372.41
42.90	332.89	296.86	373.29
43.00	333.67	297.56	374.17
43.10	334.45	298.25	375.04
43.20	335.23	298.95	375.92
43.30	336.02	299.65	376.80
43.40	336.80	300.34	377.68
43.50	337.58	301.04	378.56
43.60	338.37	301.74	379.44
43.70	339.15	302.43	380.32
43.80	339.93	303.13	381.20
43.90	340.72	303.83	382.08
44.00	341.50	304.52	382.96
44.10	342.28	305.22	383.84
44.20	343.06	305.92	384.72
44.30	343.85	306.62	385.60
44.40	344.63	307.31	386.48
44.50	345.41	308.01	387.36
44.60	346.20	308.71	388.24
44.70	346.98	309.40	389.12
44.80	347.76	310.10	390.00
44.90	348.55	310.80	390.88
45.00	349.33	311.49	391.76
45.10	350.11	312.19	392.64
45.20	350.90	312.89	393.52
45.30	351.68	313.59	394.40
45.40	352.46	314.28	395.28
45.50	353.25	314.98	396.16
45.60	354.03	315.68	397.04
45.70	354.81	316.37	397.92
45.80	355.60	317.07	398.80
45.90	356.38	317.77	399.68
46.00	357.16	318.46	400.56
46.10	357.95	319.16	401.44
46.20	358.73	319.86	402.32
46.30	359.51	320.56	403.20
46.40	360.30	321.25	404.09
46.50	361.08	321.95	404.97
46.60	361.86	322.65	405.85
46.70	362.65	323.34	406.73
46.80	363.43	324.04	407.61
46.90	364.21	324.74	408.49
47.00	365.00	325.44	409.37
47.10	365.78	326.13	410.25
47.20	366.56	326.83	411.13
47.30	367.35	327.53	412.01
47.40	368.13	328.22	412.89
47.50	368.92	328.92	413.77
47.60	369.70	329.62	414.65
47.70	370.48	330.32	415.53
47.80	371.27	331.01	416.41
47.90	372.05	331.71	417.29
48.00	372.83	332.41	418.17
48.10	373.62	333.11	419.06
48.20	374.40	333.80	419.94
48.30	375.18	334.50	420.82
48.40	375.97	335.20	421.70
48.50	376.75	335.89	422.58
48.60	377.54	336.59	423.46
48.70	378.32	337.29	424.34
48.80	379.10	337.99	425.22
48.90	379.89	338.68	426.10
49.00	380.67	339.38	426.98
49.10	381.45	340.08	427.87
49.20	382.24	340.78	428.75
49.30	383.02	341.47	429.63
49.40	383.81	342.17	430.51
49.50	384.59	342.87	431.39
49.60	385.37	343.56	432.27
49.70	386.16	344.26	433.15
49.80	386.94	344.96	434.03
49.90	387.73	345.66	434.91
50.00	388.51	346.35	435.80
50.10	389.29	347.05	436.68
50.20	390.08	347.75	437.56
50.30	390.86	348.45	438.44
50.40	391.65	349.14	439.32
50.50	392.43	349.84	440.20
50.60	393.21	350.54	441.08
50.70	394.00	351.24	441.96
50.80	394.78	351.93	442.85
50.90	395.57	352.63	443.73
51.00	396.35	353.33	444.61
51.10	397.13	354.03	445.49
51.20	397.92	354.72	446.37
51.30	398.70	355.42	447.25
51.40	399.49	356.12	448.14
51.50	400.27	356.82	449.02
51.60	401.05	357.51	449.90
51.70	401.84	358.21	450.78
51.80	402.62	358.91	451.66
51.90	403.41	359.61	452.54
52.00	404.19	360.30	453.42
52.10	404.98	361.00	454.31
52.20	405.76	361.70	455.19
52.30	406.54	362.40	456.07
52.40	407.33	363.09	456.95
52.50	408.11	363.79	457.83
52.60	408.90	364.49	458.72
52.70	409.68	365.19	459.60
52.80	410.47	365.88	460.48
52.90	411.25	366.58	461.36
53.00	412.03	367.28	462.24
53.10	412.82	367.98	463.12
53.20	413.60	368.67	464.01
53.30	414.39	369.37	464.89
53.40	415.17	370.07	465.77
53.50	415.96	370.77	466.65
53.60	416.74	371.46	467.53
53.70	417.52	372.16	468.42
53.80	418.31	372.86	469.30
53.90	419.09	373.56	470.18
54.00	419.88	374.25	471.06
54.10	420.66	374.95	471.95
54.20	421.45	375.65	472.83
54.30	422.23	376.35	473.71
54.40	423.02	377.05	474.59
54.50	423.80	377.74	475.47
54.60	424.59	378.44	476.36
54.70	425.37	379.14	477.24
54.80	426.15	379.84	478.12
54.90	426.94	380.53	479.00
55.00	427.72	381.23	479.89
55.10	428.51	381.93	480.77
55.20	429.29	382.63	481.65
55.30	430.08	383.32	482.53
55.40	430.86	384.02	483.42
55.50	431.65	384.72	484.30
55.60	432.43	385.42	485.18
55.70	433.22	386.12	486.06
55.80	434.00	386.81	486.94
55.90	434.79	387.51	487.83
56.00	435.57	388.21	488.71
56.10	436.36	388.91	489.59
56.20	437.14	389.60	490.48
56.30	437.92	390.30	491.36
56.40	438.71	391.00	492.24
56.50	439.49	391.70	493.12
56.60	440.28	392.40	494.01
56.70	441.06	393.09	494.89
56.80	441.85	393.79	495.77
56.90	442.63	394.49	496.65
57.00	443.42	395.19	497.54
57.10	444.20	395.88	498.42
57.20	444.99	396.58	499.30
57.30	445.77	397.28	500.18
57.40	446.56	397.98	501.07
57.50	447.34	398.68	501.95
57.60	448.13	399.37	502.83
57.70	448.91	400.07	503.72
57.80	449.70	400.77	504.60
57.90	450.48	401.47	505.48
58.00	451.27	402.17	506.36
58.10	452.05	402.86	507.25
58.20	452.84	403.56	508.13
58.30	453.62	404.26	509.01
58.40	454.41	404.96	509.90
58.50	455.19	405.66	510.78
58.60	455.98	406.35	511.66
58.70	456.76	407.05	512.55
58.80	457.55	407.75	513.43
58.90	458.33	408.45	514.31
59.00	459.12	409.14	515.20
59.10	459.90	409.84	516.08
59.20	460.69	410.54	516.96
59.30	461.47	411.24	517.84
59.40	462.26	411.94	518.73
59.50	463.04	412.63	519.61
59.60	463.83	413.33	520.49
59.70	464.61	414.03	521.38
59.80	465.40	414.73	522.26
59.90	466.18	415.43	523.14
60.00	466.97	416.12	524.03
60.10	467.75	416.82	524.91
60.20	468.54	417.52	525.79
60.30	469.33	418.22	526.68
60.40	470.11	418.92	527.56
60.50	470.90	419.61	528.44
60.60	471.68	420.31	529.33
60.70	472.47	421.01	530.21
60.80	473.25	421.71	531.09
60.90	474.04	422.41	531.98
61.00	474.82	423.10	532.86
61.10	475.61	423.80	533.75
61.20	476.39	424.50	534.63
61.30	477.18	425.20	535.51
61.40	477.96	425.90	536.40
61.50	478.75	426.60	537.28
61.60	479.53	427.29	538.16
61.70	480.32	427.99	539.05
61.80	481.11	428.69	539.93
61.90	481.89	429.39	540.81
62.00	482.68	430.09	541.70
62.10	483.46	430.78	542.58
62.20	484.25	431.48	543.47
62.30	485.03	432.18	544.35
62.40	485.82	432.88	545.23
62.50	486.60	433.58	546.12
62.60	487.39	434.27	547.00
62.70	488.17	434.97	547.88
62.80	488.96	435.67	548.77
62.90	489.75	436.37	549.65
63.00	490.53	437.07	550.54
63.10	491.32	437.77	551.42
63.20	492.10	438.46	552.30
63.30	492.89	439.16	553.19
63.40	493.67	439.86	554.07
63.50	494.46	440.56	554.96
63.60	495.25	441.26	555.84
63.70	496.03	441.95	556.72
63.80	496.82	442.65	557.61
63.90	497.60	443.35	558.49
64.00	498.39	444.05	559.38
64.10	499.17	444.75	560.26
64.20	499.96	445.45	561.14
64.30	500.74	446.14	562.03
64.40	501.53	446.84	562.91
64.50	502.32	447.54	563.80
64.60	503.10	448.24	564.68
64.70	503.89	448.94	565.56
64.80	504.67	449.63	566.45
64.90	505.46	450.33	567.33
65.00	506.24	451.03	568.22
65.10	507.03	451.73	569.10
65.20	507.82	452.43	569.99
65.30	508.60	453.13	570.87
65.40	509.39	453.82	571.75
65.50	510.17	454.52	572.64
65.60	510.96	455.22	573.52
65.70	511.75	455.92	574.41
65.80	512.53	456.62	575.29
65.90	513.32	457.32	576.18
66.00	514.10	458.01	577.06
66.10	514.89	458.71	577.95
66.20	515.68	459.41	578.83
66.30	516.46	460.11	579.71
66.40	517.25	460.81	580.60
66.50	518.03	461.51	581.48
66.60	518.82	462.20	582.37
66.70	519.60	462.90	583.25
66.80	520.39	463.60	584.14
66.90	521.18	464.30	585.02
67.00	521.96	465.00	585.91
67.10	522.75	465.70	586.79
67.20	523.53	466.39	587.68
67.30	524.32	467.09	588.56
67.40	525.11	467.79	589.45
67.50	525.89	468.49	590.33
67.60	526.68	469.19	591.21
67.70	527.46	469.89	592.10
67.80	528.25	470.58	592.98
67.90	529.04	471.28	593.87
68.00	529.82	471.98	594.75
68.10	530.61	472.68	595.64
68.20	531.40	473.38	596.52
68.30	532.18	474.08	597.41
68.40	532.97	474.78	598.29
68.50	533.75	475.47	599.18
68.60	534.54	476.17	600.06
68.70	535.33	476.87	600.95
68.80	536.11	477.57	601.83
68.90	536.90	478.27	602.72
69.00	537.68	478.97	603.60
69.10	538.47	479.66	604.49
69.20	539.26	480.36	605.37
69.30	540.04	481.06	606.26
69.40	540.83	481.76	607.14
69.50	541.62	482.46	608.03
69.60	542.40	483.16	608.91
69.70	543.19	483.85	609.80
69.80	543.97	484.55	610.68
69.90	544.76	485.25	611.57
70.00	545.55	485.95	612.45
70.10	546.33	486.65	613.34
70.20	547.12	487.35	614.22
70.30	547.91	488.05	615.11
70.40	548.69	488.74	615.99
70.50	549.48	489.44	616.88
70.60	550.27	490.14	617.76
70.70	551.05	490.84	618.65
70.80	551.84	491.54	619.53
70.90	552.62	492.24	620.42
71.00	553.41	492.94	621.30
71.10	554.20	493.63	622.19
71.20	554.98	494.33	623.08
71.30	555.77	495.03	623.96
71.40	556.56	495.73	624.85
71.50	557.34	496.43	625.73
71.60	558.13	497.13	626.62
71.70	558.92	497.83	627.50
71.80	559.70	498.52	628.39
71.90	560.49	499.22	629.27
72.00	561.28	499.92	630.16
72.10	562.06	500.62	631.04
72.20	562.85	501.32	631.93
72.30	563.63	502.02	632.82
72.40	564.42	502.72	633.70
72.50	565.21	503.41	634.59
72.60	565.99	504.11	635.47
72.70	566.78	504.81	636.36
72.80	567.57	505.51	637.24
72.90	568.35	506.21	638.13
73.00	569.14	506.91	639.01
73.10	569.93	507.61	639.90
73.20	570.71	508.30	640.79
73.30	571.50	509.00	641.67
73.40	572.29	509.70	642.56
73.50	573.07	510.40	643.44
73.60	573.86	511.10	644.33
73.70	574.65	511.80	645.21
73.80	575.43	512.50	646.10
73.90	576.22	513.20	646.99
74.00	577.01	513.89	647.87
74.10	577.79	514.59	648.76
74.20	578.58	515.29	649.64
74.30	579.37	515.99	650.53
74.40	580.15	516.69	651.41
74.50	580.94	517.39	652.30
74.60	581.73	518.09	653.19
74.70	582.51	518.78	654.07
74.80	583.30	519.48	654.96
74.90	584.09	520.18	655.84
75.00	584.87	520.88	656.73
75.10	585.66	521.58	657.62
75.20	586.45	522.28	658.50
75.30	587.23	522.98	659.39
75.40	588.02	523.68	660.27
75.50	588.81	524.37	661.16
75.60	589.60	525.07	662.05
75.70	590.38	525.77	662.93
75.80	591.17	526.47	663.82
75.90	591.96	527.17	664.70
76.00	592.74	527.87	665.59
76.10	593.53	528.57	666.48
76.20	594.32	529.27	667.36
76.30	595.10	529.96	668.25
76.40	595.89	530.66	669.13
76.50	596.68	531.36	670.02
76.60	597.46	532.06	670.91
76.70	598.25	532.76	671.79
76.80	599.04	533.46	672.68
76.90	599.82	534.16	673.57
77.00	600.61	534.86	674.45
77.10	601.40	535.55	675.34
77.20	602.19	536.25	676.22
77.30	602.97	536.95	677.11
77.40	603.76	537.65	678.00
77.50	604.55	538.35	678.88
77.60	605.33	539.05	679.77
77.70	606.12	539.75	680.66
77.80	606.91	540.45	681.54
77.90	607.70	541.15	682.43
78.00	608.48	541.84	683.32
78.10	609.27	542.54	684.20
78.20	610.06	543.24	685.09
78.30	610.84	543.94	685.97
78.40	611.63	544.64	686.86
78.50	612.42	545.34	687.75
78.60	613.20	546.04	688.63
78.70	613.99	546.74	689.52
78.80	614.78	547.44	690.41
78.90	615.57	548.13	691.29
79.00	616.35	548.83	692.18
79.10	617.14	549.53	693.07
79.20	617.93	550.23	693.95
79.30	618.71	550.93	694.84
79.40	619.50	551.63	695.73
79.50	620.29	552.33	696.61
79.60	621.08	553.03	697.50
79.70	621.86	553.73	698.39
79.80	622.65	554.42	699.27
79.90	623.44	555.12	700.16
80.00	624.23	555.82	701.05
80.10	625.01	556.52	701.93
80.20	625.80	557.22	702.82
80.30	626.59	557.92	703.71
80.40	627.37	558.62	704.59
80.50	628.16	559.32	705.48
80.60	628.95	560.02	706.37
80.70	629.74	560.71	707.25
80.80	630.52	561.41	708.14
80.90	631.31	562.11	709.03
81.00	632.10	562.81	709.91
81.10	632.89	563.51	710.80
81.20	633.67	564.21	711.69
81.30	634.46	564.91	712.58
81.40	635.25	565.61	713.46
81.50	636.03	566.31	714.35
81.60	636.82	567.00	715.24
81.70	637.61	567.70	716.12
81.80	638.40	568.40	717.01
81.90	639.18	569.10	717.90
82.00	639.97	569.80	718.78
82.10	640.76	570.50	719.67
82.20	641.55	571.20	720.56
82.30	642.33	571.90	721.44
82.40	643.12	572.60	722.33
82.50	643.91	573.30	723.22
