# Supplementary material
Source: MDPI journal article supplement (https://www.mdpi.com/2504-446X/8/3/115)
Supplement: s1 [file s1 › Table S15 Osteolaemus tetraspis Framework.csv]

Head Length (cm)	Fit (estimation) (cm)	Lower limit (95% confidence interval) (cm)	Upper limit (95% confidence interval) (cm)
2.70	17.35	15.50	19.42
2.80	18.01	16.09	20.15
2.90	18.67	16.69	20.88
3.00	19.33	17.29	21.62
3.10	20.00	17.89	22.35
3.20	20.66	18.49	23.09
3.30	21.33	19.09	23.83
3.40	22.00	19.70	24.57
3.50	22.66	20.30	25.30
3.60	23.33	20.90	26.04
3.70	24.00	21.51	26.78
3.80	24.67	22.11	27.52
3.90	25.34	22.71	28.26
4.00	26.01	23.32	29.00
4.10	26.68	23.93	29.75
4.20	27.35	24.53	30.49
4.30	28.02	25.14	31.23
4.40	28.69	25.75	31.97
4.50	29.36	26.35	32.72
4.60	30.04	26.96	33.46
4.70	30.71	27.57	34.21
4.80	31.38	28.18	34.95
4.90	32.06	28.79	35.70
5.00	32.73	29.40	36.44
5.10	33.41	30.01	37.19
5.20	34.08	30.62	37.94
5.30	34.76	31.23	38.68
5.40	35.43	31.84	39.43
5.50	36.11	32.45	40.18
5.60	36.79	33.06	40.93
5.70	37.46	33.67	41.68
5.80	38.14	34.29	42.43
5.90	38.82	34.90	43.18
6.00	39.50	35.51	43.93
6.10	40.17	36.12	44.68
6.20	40.85	36.74	45.43
6.30	41.53	37.35	46.18
6.40	42.21	37.97	46.93
6.50	42.89	38.58	47.69
6.60	43.57	39.19	48.44
6.70	44.25	39.81	49.19
6.80	44.93	40.42	49.94
6.90	45.61	41.04	50.70
7.00	46.30	41.66	51.45
7.10	46.98	42.27	52.21
7.20	47.66	42.89	52.96
7.30	48.34	43.50	53.72
7.40	49.02	44.12	54.47
7.50	49.71	44.74	55.23
7.60	50.39	45.35	55.99
7.70	51.07	45.97	56.74
7.80	51.76	46.59	57.50
7.90	52.44	47.21	58.26
8.00	53.13	47.82	59.01
8.10	53.81	48.44	59.77
8.20	54.49	49.06	60.53
8.30	55.18	49.68	61.29
8.40	55.86	50.30	62.05
8.50	56.55	50.92	62.81
8.60	57.24	51.54	63.57
8.70	57.92	52.15	64.33
8.80	58.61	52.77	65.09
8.90	59.29	53.39	65.85
9.00	59.98	54.01	66.61
9.10	60.67	54.63	67.37
9.20	61.35	55.25	68.13
9.30	62.04	55.87	68.89
9.40	62.73	56.49	69.65
9.50	63.42	57.11	70.42
9.60	64.11	57.74	71.18
9.70	64.79	58.36	71.94
9.80	65.48	58.98	72.71
9.90	66.17	59.60	73.47
10.00	66.86	60.22	74.23
10.10	67.55	60.84	75.00
10.20	68.24	61.46	75.76
10.30	68.93	62.09	76.53
10.40	69.62	62.71	77.29
10.50	70.31	63.33	78.05
10.60	71.00	63.95	78.82
10.70	71.69	64.57	79.59
10.80	72.38	65.20	80.35
10.90	73.07	65.82	81.12
11.00	73.76	66.44	81.88
11.10	74.45	67.07	82.65
11.20	75.14	67.69	83.42
11.30	75.83	68.31	84.18
11.40	76.53	68.93	84.95
11.50	77.22	69.56	85.72
11.60	77.91	70.18	86.49
11.70	78.60	70.81	87.26
11.80	79.29	71.43	88.02
11.90	79.99	72.05	88.79
12.00	80.68	72.68	89.56
12.10	81.37	73.30	90.33
12.20	82.07	73.93	91.10
12.30	82.76	74.55	91.87
12.40	83.45	75.18	92.64
12.50	84.15	75.80	93.41
12.60	84.84	76.43	94.18
12.70	85.53	77.05	94.95
12.80	86.23	77.68	95.72
12.90	86.92	78.30	96.49
13.00	87.62	78.93	97.26
13.10	88.31	79.55	98.03
13.20	89.01	80.18	98.81
13.30	89.70	80.80	99.58
13.40	90.40	81.43	100.35
13.50	91.09	82.05	101.12
13.60	91.79	82.68	101.90
13.70	92.48	83.31	102.67
13.80	93.18	83.93	103.44
13.90	93.87	84.56	104.21
14.00	94.57	85.19	104.99
14.10	95.27	85.81	105.76
14.20	95.96	86.44	106.54
14.30	96.66	87.06	107.31
14.40	97.36	87.69	108.08
14.50	98.05	88.32	108.86
14.60	98.75	88.95	109.63
14.70	99.45	89.57	110.41
14.80	100.14	90.20	111.18
14.90	100.84	90.83	111.96
15.00	101.54	91.45	112.73
15.10	102.24	92.08	113.51
15.20	102.93	92.71	114.29
15.30	103.63	93.34	115.06
15.40	104.33	93.96	115.84
15.50	105.03	94.59	116.61
15.60	105.73	95.22	117.39
15.70	106.42	95.85	118.17
15.80	107.12	96.48	118.95
15.90	107.82	97.10	119.72
16.00	108.52	97.73	120.50
16.10	109.22	98.36	121.28
16.20	109.92	98.99	122.06
16.30	110.62	99.62	122.83
16.40	111.32	100.25	123.61
16.50	112.02	100.87	124.39
16.60	112.72	101.50	125.17
16.70	113.42	102.13	125.95
16.80	114.12	102.76	126.73
16.90	114.82	103.39	127.51
17.00	115.52	104.02	128.29
17.10	116.22	104.65	129.07
17.20	116.92	105.28	129.85
17.30	117.62	105.91	130.63
17.40	118.32	106.54	131.41
17.50	119.02	107.16	132.19
17.60	119.72	107.79	132.97
17.70	120.42	108.42	133.75
17.80	121.12	109.05	134.53
17.90	121.82	109.68	135.31
18.00	122.53	110.31	136.09
18.10	123.23	110.94	136.87
18.20	123.93	111.57	137.65
18.30	124.63	112.20	138.43
18.40	125.33	112.83	139.22
18.50	126.03	113.46	140.00
18.60	126.74	114.09	140.78
18.70	127.44	114.72	141.56
18.80	128.14	115.35	142.35
18.90	128.84	115.98	143.13
19.00	129.55	116.61	143.91
19.10	130.25	117.24	144.69
19.20	130.95	117.87	145.48
19.30	131.65	118.51	146.26
19.40	132.36	119.14	147.04
19.50	133.06	119.77	147.83
19.60	133.76	120.40	148.61
19.70	134.47	121.03	149.40
19.80	135.17	121.66	150.18
19.90	135.87	122.29	150.97
20.00	136.58	122.92	151.75
20.10	137.28	123.55	152.53
20.20	137.98	124.18	153.32
20.30	138.69	124.82	154.10
20.40	139.39	125.45	154.89
20.50	140.10	126.08	155.68
20.60	140.80	126.71	156.46
20.70	141.51	127.34	157.25
20.80	142.21	127.97	158.03
20.90	142.92	128.60	158.82
21.00	143.62	129.24	159.60
21.10	144.32	129.87	160.39
21.20	145.03	130.50	161.18
21.30	145.73	131.13	161.96
21.40	146.44	131.76	162.75
21.50	147.14	132.39	163.54
21.60	147.85	133.03	164.33
21.70	148.56	133.66	165.11
21.80	149.26	134.29	165.90
21.90	149.97	134.92	166.69
22.00	150.67	135.56	167.48
22.10	151.38	136.19	168.26
22.20	152.08	136.82	169.05
22.30	152.79	137.45	169.84
22.40	153.50	138.09	170.63
22.50	154.20	138.72	171.42
22.60	154.91	139.35	172.20
22.70	155.62	139.98	172.99
22.80	156.32	140.62	173.78
22.90	157.03	141.25	174.57
23.00	157.73	141.88	175.36
23.10	158.44	142.51	176.15
23.20	159.15	143.15	176.94
23.30	159.86	143.78	177.73
23.40	160.56	144.41	178.52
23.50	161.27	145.05	179.31
23.60	161.98	145.68	180.10
23.70	162.68	146.31	180.89
23.80	163.39	146.94	181.68
23.90	164.10	147.58	182.47
24.00	164.81	148.21	183.26
24.10	165.51	148.84	184.05
24.20	166.22	149.48	184.84
24.30	166.93	150.11	185.63
24.40	167.64	150.75	186.42
24.50	168.35	151.38	187.22
24.60	169.05	152.01	188.01
24.70	169.76	152.65	188.80
24.80	170.47	153.28	189.59
24.90	171.18	153.91	190.38
25.00	171.89	154.55	191.17
25.10	172.60	155.18	191.97
25.20	173.30	155.81	192.76
25.30	174.01	156.45	193.55
25.40	174.72	157.08	194.34
25.50	175.43	157.72	195.14
25.60	176.14	158.35	195.93
25.70	176.85	158.98	196.72
25.80	177.56	159.62	197.51
25.90	178.27	160.25	198.31
26.00	178.98	160.89	199.10
26.10	179.69	161.52	199.89
26.20	180.40	162.16	200.69
26.30	181.11	162.79	201.48
26.40	181.82	163.42	202.28
26.50	182.52	164.06	203.07
26.60	183.23	164.69	203.86
26.70	183.94	165.33	204.66
26.80	184.65	165.96	205.45
26.90	185.36	166.60	206.25
27.00	186.07	167.23	207.04
27.10	186.79	167.87	207.84
27.20	187.50	168.50	208.63
27.30	188.21	169.14	209.43
27.40	188.92	169.77	210.22
27.50	189.63	170.41	211.02
27.60	190.34	171.04	211.81
27.70	191.05	171.68	212.61
27.80	191.76	172.31	213.40
27.90	192.47	172.94	214.20
28.00	193.18	173.58	214.99
28.10	193.89	174.22	215.79
28.20	194.60	174.85	216.59
28.30	195.31	175.49	217.38
28.40	196.03	176.12	218.18
28.50	196.74	176.76	218.98
28.60	197.45	177.39	219.77
28.70	198.16	178.03	220.57
28.80	198.87	178.66	221.37
28.90	199.58	179.30	222.16
29.00	200.29	179.93	222.96
29.10	201.01	180.57	223.76
29.20	201.72	181.20	224.55
29.30	202.43	181.84	225.35
29.40	203.14	182.47	226.15
29.50	203.85	183.11	226.95
29.60	204.57	183.75	227.75
29.70	205.28	184.38	228.54
29.80	205.99	185.02	229.34
29.90	206.70	185.65	230.14
30.00	207.42	186.29	230.94
30.10	208.13	186.92	231.74
30.20	208.84	187.56	232.53
30.30	209.55	188.20	233.33
30.40	210.27	188.83	234.13
30.50	210.98	189.47	234.93
30.60	211.69	190.10	235.73
30.70	212.40	190.74	236.53
30.80	213.12	191.38	237.33
30.90	213.83	192.01	238.13
31.00	214.54	192.65	238.93
31.10	215.26	193.29	239.73
31.20	215.97	193.92	240.53
31.30	216.68	194.56	241.33
31.40	217.40	195.19	242.13
31.50	218.11	195.83	242.93
31.60	218.82	196.47	243.73
31.70	219.54	197.10	244.53
31.80	220.25	197.74	245.33
31.90	220.97	198.38	246.13
32.00	221.68	199.01	246.93
32.10	222.39	199.65	247.73
32.20	223.11	200.29	248.53
32.30	223.82	200.92	249.33
32.40	224.54	201.56	250.13
32.50	225.25	202.20	250.93
32.60	225.96	202.83	251.73
32.70	226.68	203.47	252.53
32.80	227.39	204.11	253.34
32.90	228.11	204.74	254.14
33.00	228.82	205.38	254.94
33.10	229.54	206.02	255.74
33.20	230.25	206.65	256.54
33.30	230.97	207.29	257.34
33.40	231.68	207.93	258.15
33.50	232.39	208.56	258.95
33.60	233.11	209.20	259.75
33.70	233.82	209.84	260.55
33.80	234.54	210.48	261.36
33.90	235.25	211.11	262.16
34.00	235.97	211.75	262.96
34.10	236.69	212.39	263.76
34.20	237.40	213.02	264.57
34.30	238.12	213.66	265.37
34.40	238.83	214.30	266.17
34.50	239.55	214.94	266.98
34.60	240.26	215.57	267.78
34.70	240.98	216.21	268.58
34.80	241.69	216.85	269.39
34.90	242.41	217.49	270.19
35.00	243.13	218.12	270.99
35.10	243.84	218.76	271.80
35.20	244.56	219.40	272.60
35.30	245.27	220.04	273.41
35.40	245.99	220.67	274.21
35.50	246.71	221.31	275.01
35.60	247.42	221.95	275.82
35.70	248.14	222.59	276.62
35.80	248.85	223.22	277.43
35.90	249.57	223.86	278.23
36.00	250.29	224.50	279.04
36.10	251.00	225.14	279.84
36.20	251.72	225.77	280.65
36.30	252.44	226.41	281.45
36.40	253.15	227.05	282.26
36.50	253.87	227.69	283.06
36.60	254.59	228.33	283.87
36.70	255.30	228.96	284.67
36.80	256.02	229.60	285.48
36.90	256.74	230.24	286.28
37.00	257.45	230.88	287.09
37.10	258.17	231.52	287.89
37.20	258.89	232.15	288.70
37.30	259.61	232.79	289.51
37.40	260.32	233.43	290.31
37.50	261.04	234.07	291.12
37.60	261.76	234.71	291.93
37.70	262.47	235.35	292.73
37.80	263.19	235.98	293.54
37.90	263.91	236.62	294.35
38.00	264.63	237.26	295.15
38.10	265.35	237.90	295.96
38.20	266.06	238.54	296.77
38.30	266.78	239.17	297.57
38.40	267.50	239.81	298.38
38.50	268.22	240.45	299.19
38.60	268.93	241.09	299.99
38.70	269.65	241.73	300.80
38.80	270.37	242.37	301.61
38.90	271.09	243.01	302.42
39.00	271.81	243.64	303.22
39.10	272.52	244.28	304.03
39.20	273.24	244.92	304.84
39.30	273.96	245.56	305.65
39.40	274.68	246.20	306.46
39.50	275.40	246.84	307.26
39.60	276.12	247.48	308.07
39.70	276.84	248.11	308.88
39.80	277.55	248.75	309.69
39.90	278.27	249.39	310.50
40.00	278.99	250.03	311.31
40.10	279.71	250.67	312.11
40.20	280.43	251.31	312.92
40.30	281.15	251.95	313.73
40.40	281.87	252.59	314.54
40.50	282.59	253.23	315.35
40.60	283.30	253.86	316.16
40.70	284.02	254.50	316.97
40.80	284.74	255.14	317.78
40.90	285.46	255.78	318.59
41.00	286.18	256.42	319.40
41.10	286.90	257.06	320.21
41.20	287.62	257.70	321.02
41.30	288.34	258.34	321.83
41.40	289.06	258.98	322.64
41.50	289.78	259.62	323.45
41.60	290.50	260.26	324.26
41.70	291.22	260.89	325.07
41.80	291.94	261.53	325.88
41.90	292.66	262.17	326.69
42.00	293.38	262.81	327.50
42.10	294.10	263.45	328.31
42.20	294.82	264.09	329.12
42.30	295.54	264.73	329.93
42.40	296.26	265.37	330.74
42.50	296.98	266.01	331.55
42.60	297.70	266.65	332.36
42.70	298.42	267.29	333.17
42.80	299.14	267.93	333.98
42.90	299.86	268.57	334.79
43.00	300.58	269.21	335.60
43.10	301.30	269.85	336.42
43.20	302.02	270.49	337.23
43.30	302.74	271.13	338.04
43.40	303.46	271.77	338.85
43.50	304.18	272.41	339.66
43.60	304.90	273.04	340.47
43.70	305.62	273.68	341.29
43.80	306.34	274.32	342.10
43.90	307.06	274.96	342.91
44.00	307.78	275.60	343.72
44.10	308.50	276.24	344.53
44.20	309.23	276.88	345.35
44.30	309.95	277.52	346.16
44.40	310.67	278.16	346.97
44.50	311.39	278.80	347.78
44.60	312.11	279.44	348.60
44.70	312.83	280.08	349.41
44.80	313.55	280.72	350.22
44.90	314.27	281.36	351.03
45.00	314.99	282.00	351.85
45.10	315.72	282.64	352.66
45.20	316.44	283.28	353.47
45.30	317.16	283.92	354.29
45.40	317.88	284.56	355.10
45.50	318.60	285.20	355.91
45.60	319.32	285.84	356.73
45.70	320.05	286.48	357.54
45.80	320.77	287.12	358.35
45.90	321.49	287.76	359.17
46.00	322.21	288.40	359.98
46.10	322.93	289.04	360.80
46.20	323.65	289.68	361.61
46.30	324.38	290.32	362.42
46.40	325.10	290.96	363.24
46.50	325.82	291.60	364.05
46.60	326.54	292.24	364.87
46.70	327.26	292.89	365.68
46.80	327.99	293.53	366.49
46.90	328.71	294.17	367.31
47.00	329.43	294.81	368.12
47.10	330.15	295.45	368.94
47.20	330.88	296.09	369.75
47.30	331.60	296.73	370.57
47.40	332.32	297.37	371.38
47.50	333.04	298.01	372.20
47.60	333.77	298.65	373.01
47.70	334.49	299.29	373.83
47.80	335.21	299.93	374.64
47.90	335.93	300.57	375.46
48.00	336.66	301.21	376.27
48.10	337.38	301.85	377.09
48.20	338.10	302.49	377.90
48.30	338.83	303.13	378.72
48.40	339.55	303.77	379.54
48.50	340.27	304.41	380.35
48.60	340.99	305.06	381.17
48.70	341.72	305.70	381.98
48.80	342.44	306.34	382.80
48.90	343.16	306.98	383.62
49.00	343.89	307.62	384.43
49.10	344.61	308.26	385.25
49.20	345.33	308.90	386.06
49.30	346.06	309.54	386.88
49.40	346.78	310.18	387.70
49.50	347.50	310.82	388.51
49.60	348.23	311.46	389.33
49.70	348.95	312.10	390.15
49.80	349.67	312.75	390.96
49.90	350.40	313.39	391.78
50.00	351.12	314.03	392.60
50.10	351.84	314.67	393.41
50.20	352.57	315.31	394.23
50.30	353.29	315.95	395.05
50.40	354.02	316.59	395.87
50.50	354.74	317.23	396.68
50.60	355.46	317.87	397.50
50.70	356.19	318.51	398.32
50.80	356.91	319.16	399.13
50.90	357.64	319.80	399.95
51.00	358.36	320.44	400.77
51.10	359.08	321.08	401.59
51.20	359.81	321.72	402.41
51.30	360.53	322.36	403.22
51.40	361.26	323.00	404.04
51.50	361.98	323.64	404.86
51.60	362.71	324.28	405.68
51.70	363.43	324.93	406.50
51.80	364.15	325.57	407.31
51.90	364.88	326.21	408.13
52.00	365.60	326.85	408.95
52.10	366.33	327.49	409.77
52.20	367.05	328.13	410.59
52.30	367.78	328.77	411.41
52.40	368.50	329.42	412.22
52.50	369.23	330.06	413.04
52.60	369.95	330.70	413.86
52.70	370.68	331.34	414.68
52.80	371.40	331.98	415.50
52.90	372.13	332.62	416.32
53.00	372.85	333.26	417.14
53.10	373.58	333.91	417.96
53.20	374.30	334.55	418.78
53.30	375.03	335.19	419.60
53.40	375.75	335.83	420.42
53.50	376.48	336.47	421.23
53.60	377.20	337.11	422.05
53.70	377.93	337.76	422.87
53.80	378.65	338.40	423.69
53.90	379.38	339.04	424.51
54.00	380.10	339.68	425.33
54.10	380.83	340.32	426.15
54.20	381.55	340.96	426.97
54.30	382.28	341.61	427.79
54.40	383.00	342.25	428.61
54.50	383.73	342.89	429.43
54.60	384.45	343.53	430.25
54.70	385.18	344.17	431.07
54.80	385.91	344.81	431.89
54.90	386.63	345.46	432.72
55.00	387.36	346.10	433.54
55.10	388.08	346.74	434.36
55.20	388.81	347.38	435.18
55.30	389.54	348.02	436.00
55.40	390.26	348.67	436.82
55.50	390.99	349.31	437.64
55.60	391.71	349.95	438.46
55.70	392.44	350.59	439.28
55.80	393.17	351.23	440.10
55.90	393.89	351.88	440.92
56.00	394.62	352.52	441.74
56.10	395.34	353.16	442.57
56.20	396.07	353.80	443.39
56.30	396.80	354.44	444.21
56.40	397.52	355.09	445.03
56.50	398.25	355.73	445.85
56.60	398.98	356.37	446.67
56.70	399.70	357.01	447.50
56.80	400.43	357.65	448.32
56.90	401.15	358.30	449.14
57.00	401.88	358.94	449.96
57.10	402.61	359.58	450.78
57.20	403.33	360.22	451.60
57.30	404.06	360.87	452.43
57.40	404.79	361.51	453.25
57.50	405.51	362.15	454.07
57.60	406.24	362.79	454.89
57.70	406.97	363.43	455.72
57.80	407.69	364.08	456.54
57.90	408.42	364.72	457.36
58.00	409.15	365.36	458.18
58.10	409.88	366.00	459.01
58.20	410.60	366.65	459.83
58.30	411.33	367.29	460.65
58.40	412.06	367.93	461.47
58.50	412.78	368.57	462.30
58.60	413.51	369.22	463.12
58.70	414.24	369.86	463.94
58.80	414.97	370.50	464.77
58.90	415.69	371.14	465.59
59.00	416.42	371.79	466.41
59.10	417.15	372.43	467.24
59.20	417.87	373.07	468.06
59.30	418.60	373.71	468.88
59.40	419.33	374.36	469.71
59.50	420.06	375.00	470.53
59.60	420.78	375.64	471.35
59.70	421.51	376.28	472.18
59.80	422.24	376.93	473.00
59.90	422.97	377.57	473.83
60.00	423.69	378.21	474.65
60.10	424.42	378.85	475.47
60.20	425.15	379.50	476.30
60.30	425.88	380.14	477.12
60.40	426.61	380.78	477.95
60.50	427.33	381.42	478.77
60.60	428.06	382.07	479.59
60.70	428.79	382.71	480.42
60.80	429.52	383.35	481.24
60.90	430.25	384.00	482.07
61.00	430.97	384.64	482.89
61.10	431.70	385.28	483.72
61.20	432.43	385.92	484.54
61.30	433.16	386.57	485.37
61.40	433.89	387.21	486.19
61.50	434.61	387.85	487.02
61.60	435.34	388.49	487.84
61.70	436.07	389.14	488.67
61.80	436.80	389.78	489.49
61.90	437.53	390.42	490.32
62.00	438.26	391.07	491.14
62.10	438.98	391.71	491.97
62.20	439.71	392.35	492.79
62.30	440.44	393.00	493.62
62.40	441.17	393.64	494.44
62.50	441.90	394.28	495.27
62.60	442.63	394.92	496.09
62.70	443.36	395.57	496.92
62.80	444.08	396.21	497.74
62.90	444.81	396.85	498.57
63.00	445.54	397.50	499.40
63.10	446.27	398.14	500.22
63.20	447.00	398.78	501.05
63.30	447.73	399.43	501.87
63.40	448.46	400.07	502.70
63.50	449.19	400.71	503.53
63.60	449.92	401.35	504.35
63.70	450.64	402.00	505.18
63.80	451.37	402.64	506.00
63.90	452.10	403.28	506.83
64.00	452.83	403.93	507.66
64.10	453.56	404.57	508.48
64.20	454.29	405.21	509.31
64.30	455.02	405.86	510.14
64.40	455.75	406.50	510.96
64.50	456.48	407.14	511.79
64.60	457.21	407.79	512.62
64.70	457.94	408.43	513.44
64.80	458.67	409.07	514.27
64.90	459.40	409.72	515.10
65.00	460.12	410.36	515.92
65.10	460.85	411.00	516.75
65.20	461.58	411.65	517.58
65.30	462.31	412.29	518.41
65.40	463.04	412.93	519.23
65.50	463.77	413.58	520.06
65.60	464.50	414.22	520.89
65.70	465.23	414.86	521.72
65.80	465.96	415.51	522.54
65.90	466.69	416.15	523.37
66.00	467.42	416.79	524.20
66.10	468.15	417.44	525.03
66.20	468.88	418.08	525.85
66.30	469.61	418.72	526.68
66.40	470.34	419.37	527.51
66.50	471.07	420.01	528.34
66.60	471.80	420.66	529.17
66.70	472.53	421.30	529.99
66.80	473.26	421.94	530.82
66.90	473.99	422.59	531.65
67.00	474.72	423.23	532.48
67.10	475.45	423.87	533.31
67.20	476.18	424.52	534.13
67.30	476.91	425.16	534.96
67.40	477.64	425.80	535.79
67.50	478.37	426.45	536.62
67.60	479.10	427.09	537.45
67.70	479.83	427.73	538.28
67.80	480.56	428.38	539.11
67.90	481.29	429.02	539.93
68.00	482.02	429.67	540.76
68.10	482.75	430.31	541.59
68.20	483.49	430.95	542.42
68.30	484.22	431.60	543.25
68.40	484.95	432.24	544.08
68.50	485.68	432.88	544.91
68.60	486.41	433.53	545.74
68.70	487.14	434.17	546.57
68.80	487.87	434.82	547.40
68.90	488.60	435.46	548.23
69.00	489.33	436.10	549.05
69.10	490.06	436.75	549.88
69.20	490.79	437.39	550.71
69.30	491.52	438.04	551.54
69.40	492.25	438.68	552.37
69.50	492.99	439.32	553.20
69.60	493.72	439.97	554.03
69.70	494.45	440.61	554.86
69.80	495.18	441.25	555.69
69.90	495.91	441.90	556.52
70.00	496.64	442.54	557.35
70.10	497.37	443.19	558.18
70.20	498.10	443.83	559.01
70.30	498.83	444.47	559.84
70.40	499.57	445.12	560.67
70.50	500.30	445.76	561.50
70.60	501.03	446.41	562.33
70.70	501.76	447.05	563.16
70.80	502.49	447.69	563.99
70.90	503.22	448.34	564.82
71.00	503.95	448.98	565.65
71.10	504.68	449.63	566.48
71.20	505.42	450.27	567.32
71.30	506.15	450.92	568.15
71.40	506.88	451.56	568.98
71.50	507.61	452.20	569.81
71.60	508.34	452.85	570.64
71.70	509.07	453.49	571.47
71.80	509.81	454.14	572.30
71.90	510.54	454.78	573.13
72.00	511.27	455.42	573.96
72.10	512.00	456.07	574.79
72.20	512.73	456.71	575.62
72.30	513.46	457.36	576.46
72.40	514.20	458.00	577.29
72.50	514.93	458.65	578.12
72.60	515.66	459.29	578.95
72.70	516.39	459.93	579.78
72.80	517.12	460.58	580.61
72.90	517.86	461.22	581.44
73.00	518.59	461.87	582.28
73.10	519.32	462.51	583.11
73.20	520.05	463.16	583.94
73.30	520.78	463.80	584.77
73.40	521.52	464.44	585.60
73.50	522.25	465.09	586.44
73.60	522.98	465.73	587.27
73.70	523.71	466.38	588.10
73.80	524.45	467.02	588.93
73.90	525.18	467.67	589.76
74.00	525.91	468.31	590.60
74.10	526.64	468.96	591.43
74.20	527.38	469.60	592.26
74.30	528.11	470.24	593.09
74.40	528.84	470.89	593.92
74.50	529.57	471.53	594.76
74.60	530.31	472.18	595.59
74.70	531.04	472.82	596.42
74.80	531.77	473.47	597.25
74.90	532.50	474.11	598.09
75.00	533.24	474.76	598.92
75.10	533.97	475.40	599.75
75.20	534.70	476.04	600.59
75.30	535.43	476.69	601.42
75.40	536.17	477.33	602.25
75.50	536.90	477.98	603.08
75.60	537.63	478.62	603.92
75.70	538.37	479.27	604.75
75.80	539.10	479.91	605.58
75.90	539.83	480.56	606.42
76.00	540.56	481.20	607.25
76.10	541.30	481.85	608.08
76.20	542.03	482.49	608.92
76.30	542.76	483.14	609.75
76.40	543.50	483.78	610.58
76.50	544.23	484.42	611.42
76.60	544.96	485.07	612.25
76.70	545.70	485.71	613.08
76.80	546.43	486.36	613.92
76.90	547.16	487.00	614.75
77.00	547.90	487.65	615.59
77.10	548.63	488.29	616.42
77.20	549.36	488.94	617.25
77.30	550.10	489.58	618.09
77.40	550.83	490.23	618.92
77.50	551.56	490.87	619.75
77.60	552.30	491.52	620.59
77.70	553.03	492.16	621.42
77.80	553.76	492.81	622.26
77.90	554.50	493.45	623.09
78.00	555.23	494.10	623.93
78.10	555.96	494.74	624.76
78.20	556.70	495.39	625.59
78.30	557.43	496.03	626.43
78.40	558.16	496.68	627.26
78.50	558.90	497.32	628.10
78.60	559.63	497.97	628.93
78.70	560.36	498.61	629.77
78.80	561.10	499.26	630.60
78.90	561.83	499.90	631.44
79.00	562.57	500.55	632.27
79.10	563.30	501.19	633.11
79.20	564.03	501.84	633.94
79.30	564.77	502.48	634.78
79.40	565.50	503.13	635.61
79.50	566.24	503.77	636.45
79.60	566.97	504.42	637.28
79.70	567.70	505.06	638.12
79.80	568.44	505.71	638.95
79.90	569.17	506.35	639.79
80.00	569.91	507.00	640.62
80.10	570.64	507.64	641.46
80.20	571.37	508.29	642.29
80.30	572.11	508.93	643.13
80.40	572.84	509.58	643.96
80.50	573.58	510.22	644.80
80.60	574.31	510.87	645.63
80.70	575.05	511.51	646.47
80.80	575.78	512.16	647.31
80.90	576.51	512.80	648.14
81.00	577.25	513.45	648.98
81.10	577.98	514.09	649.81
81.20	578.72	514.74	650.65
81.30	579.45	515.38	651.49
81.40	580.19	516.03	652.32
81.50	580.92	516.67	653.16
81.60	581.66	517.32	653.99
81.70	582.39	517.96	654.83
81.80	583.12	518.61	655.67
81.90	583.86	519.25	656.50
82.00	584.59	519.90	657.34
82.10	585.33	520.54	658.17
82.20	586.06	521.19	659.01
82.30	586.80	521.83	659.85
82.40	587.53	522.48	660.68
82.50	588.27	523.13	661.52
