# Supplementary material
Source: MDPI journal article supplement (https://www.mdpi.com/2504-446X/8/3/115)
Supplement: s1 [file s1 › Table S16 Paleosuchus palpebrosus Framework.csv]

Head Length (cm)	Fit (estimation) (cm)	Lower limit (95% confidence interval) (cm)	Upper limit (95% confidence interval) (cm)
2.70	17.40	15.75	19.23
2.80	18.09	16.38	19.98
2.90	18.78	17.01	20.74
3.00	19.47	17.63	21.50
3.10	20.17	18.26	22.27
3.20	20.86	18.89	23.03
3.30	21.55	19.53	23.79
3.40	22.25	20.16	24.56
3.50	22.95	20.79	25.33
3.60	23.65	21.43	26.10
3.70	24.35	22.07	26.87
3.80	25.05	22.71	27.64
3.90	25.76	23.34	28.42
4.00	26.46	23.98	29.19
4.10	27.17	24.63	29.97
4.20	27.87	25.27	30.74
4.30	28.58	25.91	31.52
4.40	29.29	26.56	32.30
4.50	30.00	27.20	33.08
4.60	30.71	27.85	33.87
4.70	31.42	28.50	34.65
4.80	32.14	29.14	35.43
4.90	32.85	29.79	36.22
5.00	33.56	30.44	37.01
5.10	34.28	31.09	37.79
5.20	35.00	31.75	38.58
5.30	35.72	32.40	39.37
5.40	36.43	33.05	40.16
5.50	37.15	33.71	40.95
5.60	37.87	34.36	41.75
5.70	38.60	35.02	42.54
5.80	39.32	35.67	43.33
5.90	40.04	36.33	44.13
6.00	40.76	36.99	44.93
6.10	41.49	37.65	45.72
6.20	42.21	38.31	46.52
6.30	42.94	38.97	47.32
6.40	43.67	39.63	48.12
6.50	44.39	40.29	48.92
6.60	45.12	40.95	49.72
6.70	45.85	41.61	50.52
6.80	46.58	42.28	51.33
6.90	47.31	42.94	52.13
7.00	48.04	43.60	52.93
7.10	48.77	44.27	53.74
7.20	49.51	44.93	54.55
7.30	50.24	45.60	55.35
7.40	50.97	46.27	56.16
7.50	51.71	46.94	56.97
7.60	52.44	47.60	57.78
7.70	53.18	48.27	58.59
7.80	53.92	48.94	59.40
7.90	54.65	49.61	60.21
8.00	55.39	50.28	61.02
8.10	56.13	50.95	61.83
8.20	56.87	51.62	62.65
8.30	57.61	52.30	63.46
8.40	58.35	52.97	64.27
8.50	59.09	53.64	65.09
8.60	59.83	54.31	65.91
8.70	60.57	54.99	66.72
8.80	61.31	55.66	67.54
8.90	62.06	56.34	68.36
9.00	62.80	57.01	69.18
9.10	63.54	57.69	69.99
9.20	64.29	58.37	70.81
9.30	65.03	59.04	71.63
9.40	65.78	59.72	72.46
9.50	66.53	60.40	73.28
9.60	67.27	61.08	74.10
9.70	68.02	61.75	74.92
9.80	68.77	62.43	75.74
9.90	69.52	63.11	76.57
10.00	70.26	63.79	77.39
10.10	71.01	64.47	78.22
10.20	71.76	65.15	79.04
10.30	72.51	65.83	79.87
10.40	73.26	66.52	80.70
10.50	74.01	67.20	81.52
10.60	74.77	67.88	82.35
10.70	75.52	68.56	83.18
10.80	76.27	69.25	84.01
10.90	77.02	69.93	84.84
11.00	77.78	70.61	85.67
11.10	78.53	71.30	86.50
11.20	79.29	71.98	87.33
11.30	80.04	72.67	88.16
11.40	80.80	73.35	88.99
11.50	81.55	74.04	89.82
11.60	82.31	74.73	90.66
11.70	83.06	75.41	91.49
11.80	83.82	76.10	92.32
11.90	84.58	76.79	93.16
12.00	85.34	77.48	93.99
12.10	86.09	78.16	94.83
12.20	86.85	78.85	95.66
12.30	87.61	79.54	96.50
12.40	88.37	80.23	97.34
12.50	89.13	80.92	98.17
12.60	89.89	81.61	99.01
12.70	90.65	82.30	99.85
12.80	91.41	82.99	100.69
12.90	92.17	83.68	101.53
13.00	92.94	84.37	102.37
13.10	93.70	85.07	103.21
13.20	94.46	85.76	104.05
13.30	95.22	86.45	104.89
13.40	95.99	87.14	105.73
13.50	96.75	87.84	106.57
13.60	97.51	88.53	107.41
13.70	98.28	89.22	108.25
13.80	99.04	89.92	109.10
13.90	99.81	90.61	109.94
14.00	100.57	91.31	110.78
14.10	101.34	92.00	111.63
14.20	102.11	92.70	112.47
14.30	102.87	93.39	113.32
14.40	103.64	94.09	114.16
14.50	104.41	94.78	115.01
14.60	105.17	95.48	115.85
14.70	105.94	96.18	116.70
14.80	106.71	96.87	117.55
14.90	107.48	97.57	118.40
15.00	108.25	98.27	119.24
15.10	109.02	98.96	120.09
15.20	109.79	99.66	120.94
15.30	110.56	100.36	121.79
15.40	111.33	101.06	122.64
15.50	112.10	101.76	123.49
15.60	112.87	102.46	124.34
15.70	113.64	103.16	125.19
15.80	114.41	103.86	126.04
15.90	115.18	104.56	126.89
16.00	115.96	105.26	127.74
16.10	116.73	105.96	128.60
16.20	117.50	106.66	129.45
16.30	118.28	107.36	130.30
16.40	119.05	108.06	131.15
16.50	119.82	108.76	132.01
16.60	120.60	109.47	132.86
16.70	121.37	110.17	133.71
16.80	122.15	110.87	134.57
16.90	122.92	111.57	135.42
17.00	123.70	112.28	136.28
17.10	124.47	112.98	137.14
17.20	125.25	113.68	137.99
17.30	126.02	114.39	138.85
17.40	126.80	115.09	139.70
17.50	127.58	115.79	140.56
17.60	128.36	116.50	141.42
17.70	129.13	117.20	142.28
17.80	129.91	117.91	143.13
17.90	130.69	118.61	143.99
18.00	131.47	119.32	144.85
18.10	132.25	120.03	145.71
18.20	133.02	120.73	146.57
18.30	133.80	121.44	147.43
18.40	134.58	122.14	148.29
18.50	135.36	122.85	149.15
18.60	136.14	123.56	150.01
18.70	136.92	124.26	150.87
18.80	137.70	124.97	151.73
18.90	138.48	125.68	152.59
19.00	139.27	126.39	153.46
19.10	140.05	127.10	154.32
19.20	140.83	127.80	155.18
19.30	141.61	128.51	156.04
19.40	142.39	129.22	156.91
19.50	143.18	129.93	157.77
19.60	143.96	130.64	158.63
19.70	144.74	131.35	159.50
19.80	145.52	132.06	160.36
19.90	146.31	132.77	161.23
20.00	147.09	133.48	162.09
20.10	147.88	134.19	162.96
20.20	148.66	134.90	163.82
20.30	149.44	135.61	164.69
20.40	150.23	136.32	165.56
20.50	151.01	137.03	166.42
20.60	151.80	137.74	167.29
20.70	152.59	138.45	168.16
20.80	153.37	139.17	169.03
20.90	154.16	139.88	169.89
21.00	154.94	140.59	170.76
21.10	155.73	141.30	171.63
21.20	156.52	142.02	172.50
21.30	157.30	142.73	173.37
21.40	158.09	143.44	174.24
21.50	158.88	144.16	175.11
21.60	159.67	144.87	175.98
21.70	160.45	145.58	176.85
21.80	161.24	146.30	177.72
21.90	162.03	147.01	178.59
22.00	162.82	147.72	179.46
22.10	163.61	148.44	180.33
22.20	164.40	149.15	181.20
22.30	165.19	149.87	182.07
22.40	165.98	150.58	182.94
22.50	166.77	151.30	183.82
22.60	167.56	152.01	184.69
22.70	168.35	152.73	185.56
22.80	169.14	153.45	186.44
22.90	169.93	154.16	187.31
23.00	170.72	154.88	188.18
23.10	171.51	155.59	189.06
23.20	172.30	156.31	189.93
23.30	173.09	157.03	190.81
23.40	173.89	157.74	191.68
23.50	174.68	158.46	192.55
23.60	175.47	159.18	193.43
23.70	176.26	159.90	194.31
23.80	177.06	160.61	195.18
23.90	177.85	161.33	196.06
24.00	178.64	162.05	196.93
24.10	179.44	162.77	197.81
24.20	180.23	163.49	198.69
24.30	181.02	164.20	199.56
24.40	181.82	164.92	200.44
24.50	182.61	165.64	201.32
24.60	183.41	166.36	202.20
24.70	184.20	167.08	203.08
24.80	185.00	167.80	203.95
24.90	185.79	168.52	204.83
25.00	186.59	169.24	205.71
25.10	187.38	169.96	206.59
25.20	188.18	170.68	207.47
25.30	188.97	171.40	208.35
25.40	189.77	172.12	209.23
25.50	190.57	172.84	210.11
25.60	191.36	173.56	210.99
25.70	192.16	174.28	211.87
25.80	192.96	175.00	212.75
25.90	193.75	175.73	213.63
26.00	194.55	176.45	214.51
26.10	195.35	177.17	215.40
26.20	196.15	177.89	216.28
26.30	196.95	178.61	217.16
26.40	197.74	179.34	218.04
26.50	198.54	180.06	218.92
26.60	199.34	180.78	219.81
26.70	200.14	181.50	220.69
26.80	200.94	182.23	221.57
26.90	201.74	182.95	222.46
27.00	202.54	183.67	223.34
27.10	203.34	184.40	224.22
27.20	204.14	185.12	225.11
27.30	204.94	185.84	225.99
27.40	205.74	186.57	226.88
27.50	206.54	187.29	227.76
27.60	207.34	188.01	228.65
27.70	208.14	188.74	229.53
27.80	208.94	189.46	230.42
27.90	209.74	190.19	231.30
28.00	210.54	190.91	232.19
28.10	211.34	191.64	233.08
28.20	212.15	192.36	233.96
28.30	212.95	193.09	234.85
28.40	213.75	193.81	235.74
28.50	214.55	194.54	236.62
28.60	215.35	195.27	237.51
28.70	216.16	195.99	238.40
28.80	216.96	196.72	239.29
28.90	217.76	197.44	240.17
29.00	218.57	198.17	241.06
29.10	219.37	198.90	241.95
29.20	220.17	199.62	242.84
29.30	220.98	200.35	243.73
29.40	221.78	201.08	244.62
29.50	222.59	201.80	245.51
29.60	223.39	202.53	246.40
29.70	224.19	203.26	247.29
29.80	225.00	203.99	248.18
29.90	225.80	204.71	249.07
30.00	226.61	205.44	249.96
30.10	227.41	206.17	250.85
30.20	228.22	206.90	251.74
30.30	229.02	207.63	252.63
30.40	229.83	208.35	253.52
30.50	230.64	209.08	254.41
30.60	231.44	209.81	255.30
30.70	232.25	210.54	256.20
30.80	233.05	211.27	257.09
30.90	233.86	212.00	257.98
31.00	234.67	212.73	258.87
31.10	235.48	213.46	259.77
31.20	236.28	214.19	260.66
31.30	237.09	214.92	261.55
31.40	237.90	215.65	262.44
31.50	238.70	216.38	263.34
31.60	239.51	217.11	264.23
31.70	240.32	217.84	265.13
31.80	241.13	218.57	266.02
31.90	241.94	219.30	266.91
32.00	242.75	220.03	267.81
32.10	243.55	220.76	268.70
32.20	244.36	221.49	269.60
32.30	245.17	222.22	270.49
32.40	245.98	222.95	271.39
32.50	246.79	223.68	272.28
32.60	247.60	224.41	273.18
32.70	248.41	225.15	274.08
32.80	249.22	225.88	274.97
32.90	250.03	226.61	275.87
33.00	250.84	227.34	276.76
33.10	251.65	228.07	277.66
33.20	252.46	228.81	278.56
33.30	253.27	229.54	279.46
33.40	254.08	230.27	280.35
33.50	254.89	231.00	281.25
33.60	255.70	231.74	282.15
33.70	256.51	232.47	283.05
33.80	257.33	233.20	283.94
33.90	258.14	233.94	284.84
34.00	258.95	234.67	285.74
34.10	259.76	235.40	286.64
34.20	260.57	236.14	287.54
34.30	261.38	236.87	288.44
34.40	262.20	237.60	289.34
34.50	263.01	238.34	290.24
34.60	263.82	239.07	291.14
34.70	264.63	239.81	292.03
34.80	265.45	240.54	292.93
34.90	266.26	241.27	293.83
35.00	267.07	242.01	294.74
35.10	267.89	242.74	295.64
35.20	268.70	243.48	296.54
35.30	269.51	244.21	297.44
35.40	270.33	244.95	298.34
35.50	271.14	245.68	299.24
35.60	271.96	246.42	300.14
35.70	272.77	247.15	301.04
35.80	273.59	247.89	301.94
35.90	274.40	248.63	302.85
36.00	275.21	249.36	303.75
36.10	276.03	250.10	304.65
36.20	276.84	250.83	305.55
36.30	277.66	251.57	306.46
36.40	278.48	252.31	307.36
36.50	279.29	253.04	308.26
36.60	280.11	253.78	309.16
36.70	280.92	254.52	310.07
36.80	281.74	255.25	310.97
36.90	282.55	255.99	311.88
37.00	283.37	256.73	312.78
37.10	284.19	257.46	313.68
37.20	285.00	258.20	314.59
37.30	285.82	258.94	315.49
37.40	286.64	259.68	316.40
37.50	287.45	260.41	317.30
37.60	288.27	261.15	318.21
37.70	289.09	261.89	319.11
37.80	289.91	262.63	320.02
37.90	290.72	263.37	320.92
38.00	291.54	264.10	321.83
38.10	292.36	264.84	322.73
38.20	293.18	265.58	323.64
38.30	293.99	266.32	324.55
38.40	294.81	267.06	325.45
38.50	295.63	267.80	326.36
38.60	296.45	268.54	327.27
38.70	297.27	269.27	328.17
38.80	298.09	270.01	329.08
38.90	298.91	270.75	329.99
39.00	299.73	271.49	330.89
39.10	300.54	272.23	331.80
39.20	301.36	272.97	332.71
39.30	302.18	273.71	333.62
39.40	303.00	274.45	334.53
39.50	303.82	275.19	335.43
39.60	304.64	275.93	336.34
39.70	305.46	276.67	337.25
39.80	306.28	277.41	338.16
39.90	307.10	278.15	339.07
40.00	307.92	278.89	339.98
40.10	308.74	279.63	340.89
40.20	309.56	280.37	341.80
40.30	310.39	281.11	342.71
40.40	311.21	281.86	343.61
40.50	312.03	282.60	344.52
40.60	312.85	283.34	345.43
40.70	313.67	284.08	346.34
40.80	314.49	284.82	347.26
40.90	315.31	285.56	348.17
41.00	316.14	286.30	349.08
41.10	316.96	287.04	349.99
41.20	317.78	287.79	350.90
41.30	318.60	288.53	351.81
41.40	319.42	289.27	352.72
41.50	320.25	290.01	353.63
41.60	321.07	290.75	354.54
41.70	321.89	291.50	355.46
41.80	322.71	292.24	356.37
41.90	323.54	292.98	357.28
42.00	324.36	293.72	358.19
42.10	325.18	294.47	359.10
42.20	326.01	295.21	360.02
42.30	326.83	295.95	360.93
42.40	327.65	296.70	361.84
42.50	328.48	297.44	362.75
42.60	329.30	298.18	363.67
42.70	330.13	298.93	364.58
42.80	330.95	299.67	365.49
42.90	331.77	300.41	366.41
43.00	332.60	301.16	367.32
43.10	333.42	301.90	368.24
43.20	334.25	302.64	369.15
43.30	335.07	303.39	370.06
43.40	335.90	304.13	370.98
43.50	336.72	304.88	371.89
43.60	337.55	305.62	372.81
43.70	338.37	306.37	373.72
43.80	339.20	307.11	374.64
43.90	340.02	307.85	375.55
44.00	340.85	308.60	376.47
44.10	341.67	309.34	377.38
44.20	342.50	310.09	378.30
44.30	343.33	310.83	379.22
44.40	344.15	311.58	380.13
44.50	344.98	312.32	381.05
44.60	345.80	313.07	381.96
44.70	346.63	313.81	382.88
44.80	347.46	314.56	383.80
44.90	348.28	315.31	384.71
45.00	349.11	316.05	385.63
45.10	349.94	316.80	386.55
45.20	350.77	317.54	387.46
45.30	351.59	318.29	388.38
45.40	352.42	319.03	389.30
45.50	353.25	319.78	390.22
45.60	354.08	320.53	391.13
45.70	354.90	321.27	392.05
45.80	355.73	322.02	392.97
45.90	356.56	322.77	393.89
46.00	357.39	323.51	394.81
46.10	358.21	324.26	395.72
46.20	359.04	325.01	396.64
46.30	359.87	325.75	397.56
46.40	360.70	326.50	398.48
46.50	361.53	327.25	399.40
46.60	362.36	328.00	400.32
46.70	363.19	328.74	401.24
46.80	364.01	329.49	402.16
46.90	364.84	330.24	403.08
47.00	365.67	330.98	404.00
47.10	366.50	331.73	404.92
47.20	367.33	332.48	405.84
47.30	368.16	333.23	406.76
47.40	368.99	333.98	407.68
47.50	369.82	334.72	408.60
47.60	370.65	335.47	409.52
47.70	371.48	336.22	410.44
47.80	372.31	336.97	411.36
47.90	373.14	337.72	412.28
48.00	373.97	338.47	413.20
48.10	374.80	339.21	414.12
48.20	375.63	339.96	415.04
48.30	376.46	340.71	415.97
48.40	377.29	341.46	416.89
48.50	378.13	342.21	417.81
48.60	378.96	342.96	418.73
48.70	379.79	343.71	419.65
48.80	380.62	344.46	420.58
48.90	381.45	345.21	421.50
49.00	382.28	345.96	422.42
49.10	383.11	346.71	423.34
49.20	383.94	347.46	424.27
49.30	384.78	348.21	425.19
49.40	385.61	348.95	426.11
49.50	386.44	349.70	427.04
49.60	387.27	350.45	427.96
49.70	388.11	351.20	428.88
49.80	388.94	351.96	429.81
49.90	389.77	352.71	430.73
50.00	390.60	353.46	431.65
50.10	391.44	354.21	432.58
50.20	392.27	354.96	433.50
50.30	393.10	355.71	434.43
50.40	393.93	356.46	435.35
50.50	394.77	357.21	436.27
50.60	395.60	357.96	437.20
50.70	396.43	358.71	438.12
50.80	397.27	359.46	439.05
50.90	398.10	360.21	439.97
51.00	398.93	360.96	440.90
51.10	399.77	361.72	441.82
51.20	400.60	362.47	442.75
51.30	401.44	363.22	443.68
51.40	402.27	363.97	444.60
51.50	403.10	364.72	445.53
51.60	403.94	365.47	446.45
51.70	404.77	366.22	447.38
51.80	405.61	366.98	448.31
51.90	406.44	367.73	449.23
52.00	407.28	368.48	450.16
52.10	408.11	369.23	451.09
52.20	408.95	369.99	452.01
52.30	409.78	370.74	452.94
52.40	410.62	371.49	453.87
52.50	411.45	372.24	454.79
52.60	412.29	372.99	455.72
52.70	413.12	373.75	456.65
52.80	413.96	374.50	457.58
52.90	414.79	375.25	458.50
53.00	415.63	376.01	459.43
53.10	416.47	376.76	460.36
53.20	417.30	377.51	461.29
53.30	418.14	378.27	462.21
53.40	418.97	379.02	463.14
53.50	419.81	379.77	464.07
53.60	420.65	380.53	465.00
53.70	421.48	381.28	465.93
53.80	422.32	382.03	466.86
53.90	423.16	382.79	467.79
54.00	423.99	383.54	468.72
54.10	424.83	384.29	469.64
54.20	425.67	385.05	470.57
54.30	426.51	385.80	471.50
54.40	427.34	386.56	472.43
54.50	428.18	387.31	473.36
54.60	429.02	388.06	474.29
54.70	429.85	388.82	475.22
54.80	430.69	389.57	476.15
54.90	431.53	390.33	477.08
55.00	432.37	391.08	478.01
55.10	433.21	391.84	478.94
55.20	434.04	392.59	479.87
55.30	434.88	393.35	480.80
55.40	435.72	394.10	481.74
55.50	436.56	394.86	482.67
55.60	437.40	395.61	483.60
55.70	438.24	396.37	484.53
55.80	439.07	397.12	485.46
55.90	439.91	397.88	486.39
56.00	440.75	398.63	487.32
56.10	441.59	399.39	488.25
56.20	442.43	400.14	489.19
56.30	443.27	400.90	490.12
56.40	444.11	401.65	491.05
56.50	444.95	402.41	491.98
56.60	445.79	403.17	492.91
56.70	446.63	403.92	493.85
56.80	447.47	404.68	494.78
56.90	448.31	405.43	495.71
57.00	449.15	406.19	496.65
57.10	449.99	406.95	497.58
57.20	450.83	407.70	498.51
57.30	451.67	408.46	499.44
57.40	452.51	409.21	500.38
57.50	453.35	409.97	501.31
57.60	454.19	410.73	502.24
57.70	455.03	411.48	503.18
57.80	455.87	412.24	504.11
57.90	456.71	413.00	505.05
58.00	457.55	413.76	505.98
58.10	458.39	414.51	506.91
58.20	459.23	415.27	507.85
58.30	460.07	416.03	508.78
58.40	460.91	416.78	509.72
58.50	461.75	417.54	510.65
58.60	462.60	418.30	511.59
58.70	463.44	419.06	512.52
58.80	464.28	419.81	513.45
58.90	465.12	420.57	514.39
59.00	465.96	421.33	515.32
59.10	466.80	422.09	516.26
59.20	467.65	422.84	517.20
59.30	468.49	423.60	518.13
59.40	469.33	424.36	519.07
59.50	470.17	425.12	520.00
59.60	471.01	425.88	520.94
59.70	471.86	426.63	521.87
59.80	472.70	427.39	522.81
59.90	473.54	428.15	523.75
60.00	474.38	428.91	524.68
60.10	475.23	429.67	525.62
60.20	476.07	430.43	526.56
60.30	476.91	431.18	527.49
60.40	477.76	431.94	528.43
60.50	478.60	432.70	529.37
60.60	479.44	433.46	530.30
60.70	480.29	434.22	531.24
60.80	481.13	434.98	532.18
60.90	481.97	435.74	533.11
61.00	482.82	436.50	534.05
61.10	483.66	437.26	534.99
61.20	484.50	438.02	535.93
61.30	485.35	438.78	536.86
61.40	486.19	439.53	537.80
61.50	487.04	440.29	538.74
61.60	487.88	441.05	539.68
61.70	488.72	441.81	540.62
61.80	489.57	442.57	541.55
61.90	490.41	443.33	542.49
62.00	491.26	444.09	543.43
62.10	492.10	444.85	544.37
62.20	492.95	445.61	545.31
62.30	493.79	446.37	546.25
62.40	494.64	447.13	547.19
62.50	495.48	447.89	548.13
62.60	496.33	448.65	549.06
62.70	497.17	449.41	550.00
62.80	498.02	450.17	550.94
62.90	498.86	450.93	551.88
63.00	499.71	451.70	552.82
63.10	500.55	452.46	553.76
63.20	501.40	453.22	554.70
63.30	502.24	453.98	555.64
63.40	503.09	454.74	556.58
63.50	503.94	455.50	557.52
63.60	504.78	456.26	558.46
63.70	505.63	457.02	559.40
63.80	506.47	457.78	560.34
63.90	507.32	458.54	561.28
64.00	508.17	459.31	562.22
64.10	509.01	460.07	563.17
64.20	509.86	460.83	564.11
64.30	510.71	461.59	565.05
64.40	511.55	462.35	565.99
64.50	512.40	463.11	566.93
64.60	513.25	463.87	567.87
64.70	514.09	464.64	568.81
64.80	514.94	465.40	569.75
64.90	515.79	466.16	570.70
65.00	516.63	466.92	571.64
65.10	517.48	467.68	572.58
65.20	518.33	468.45	573.52
65.30	519.17	469.21	574.46
65.40	520.02	469.97	575.41
65.50	520.87	470.73	576.35
65.60	521.72	471.49	577.29
65.70	522.57	472.26	578.23
65.80	523.41	473.02	579.17
65.90	524.26	473.78	580.12
66.00	525.11	474.55	581.06
66.10	525.96	475.31	582.00
66.20	526.81	476.07	582.95
66.30	527.65	476.83	583.89
66.40	528.50	477.60	584.83
66.50	529.35	478.36	585.78
66.60	530.20	479.12	586.72
66.70	531.05	479.89	587.66
66.80	531.90	480.65	588.61
66.90	532.74	481.41	589.55
67.00	533.59	482.18	590.49
67.10	534.44	482.94	591.44
67.20	535.29	483.70	592.38
67.30	536.14	484.47	593.33
67.40	536.99	485.23	594.27
67.50	537.84	485.99	595.22
67.60	538.69	486.76	596.16
67.70	539.54	487.52	597.10
67.80	540.39	488.28	598.05
67.90	541.24	489.05	598.99
68.00	542.09	489.81	599.94
68.10	542.94	490.58	600.88
68.20	543.79	491.34	601.83
68.30	544.64	492.10	602.77
68.40	545.49	492.87	603.72
68.50	546.34	493.63	604.66
68.60	547.19	494.40	605.61
68.70	548.04	495.16	606.56
68.80	548.89	495.93	607.50
68.90	549.74	496.69	608.45
69.00	550.59	497.46	609.39
69.10	551.44	498.22	610.34
69.20	552.29	498.98	611.29
69.30	553.14	499.75	612.23
69.40	553.99	500.51	613.18
69.50	554.84	501.28	614.12
69.60	555.69	502.04	615.07
69.70	556.54	502.81	616.02
69.80	557.39	503.57	616.96
69.90	558.24	504.34	617.91
70.00	559.10	505.11	618.86
70.10	559.95	505.87	619.80
70.20	560.80	506.64	620.75
70.30	561.65	507.40	621.70
70.40	562.50	508.17	622.65
70.50	563.35	508.93	623.59
70.60	564.21	509.70	624.54
70.70	565.06	510.46	625.49
70.80	565.91	511.23	626.44
70.90	566.76	512.00	627.38
71.00	567.61	512.76	628.33
71.10	568.47	513.53	629.28
71.20	569.32	514.29	630.23
71.30	570.17	515.06	631.18
71.40	571.02	515.83	632.13
71.50	571.87	516.59	633.07
71.60	572.73	517.36	634.02
71.70	573.58	518.12	634.97
71.80	574.43	518.89	635.92
71.90	575.29	519.66	636.87
72.00	576.14	520.42	637.82
72.10	576.99	521.19	638.77
72.20	577.84	521.96	639.71
72.30	578.70	522.72	640.66
72.40	579.55	523.49	641.61
72.50	580.40	524.26	642.56
72.60	581.26	525.02	643.51
72.70	582.11	525.79	644.46
72.80	582.96	526.56	645.41
72.90	583.82	527.33	646.36
73.00	584.67	528.09	647.31
73.10	585.52	528.86	648.26
73.20	586.38	529.63	649.21
73.30	587.23	530.39	650.16
73.40	588.09	531.16	651.11
73.50	588.94	531.93	652.06
73.60	589.79	532.70	653.01
73.70	590.65	533.46	653.96
73.80	591.50	534.23	654.91
73.90	592.36	535.00	655.86
74.00	593.21	535.77	656.81
74.10	594.07	536.54	657.77
74.20	594.92	537.30	658.72
74.30	595.78	538.07	659.67
74.40	596.63	538.84	660.62
74.50	597.48	539.61	661.57
74.60	598.34	540.37	662.52
74.70	599.19	541.14	663.47
74.80	600.05	541.91	664.42
74.90	600.90	542.68	665.38
75.00	601.76	543.45	666.33
75.10	602.61	544.22	667.28
75.20	603.47	544.98	668.23
75.30	604.33	545.75	669.18
75.40	605.18	546.52	670.14
75.50	606.04	547.29	671.09
75.60	606.89	548.06	672.04
75.70	607.75	548.83	672.99
75.80	608.60	549.60	673.94
75.90	609.46	550.37	674.90
76.00	610.32	551.13	675.85
76.10	611.17	551.90	676.80
76.20	612.03	552.67	677.76
76.30	612.88	553.44	678.71
76.40	613.74	554.21	679.66
76.50	614.60	554.98	680.61
76.60	615.45	555.75	681.57
76.70	616.31	556.52	682.52
76.80	617.16	557.29	683.47
76.90	618.02	558.06	684.43
77.00	618.88	558.83	685.38
77.10	619.73	559.60	686.34
77.20	620.59	560.37	687.29
77.30	621.45	561.14	688.24
77.40	622.31	561.91	689.20
77.50	623.16	562.68	690.15
77.60	624.02	563.45	691.11
77.70	624.88	564.22	692.06
77.80	625.73	564.99	693.01
77.90	626.59	565.76	693.97
78.00	627.45	566.53	694.92
78.10	628.31	567.30	695.88
78.20	629.16	568.07	696.83
78.30	630.02	568.84	697.79
78.40	630.88	569.61	698.74
78.50	631.74	570.38	699.70
78.60	632.59	571.15	700.65
78.70	633.45	571.92	701.61
78.80	634.31	572.69	702.56
78.90	635.17	573.46	703.52
79.00	636.03	574.23	704.47
79.10	636.88	575.00	705.43
79.20	637.74	575.77	706.38
79.30	638.60	576.54	707.34
79.40	639.46	577.31	708.30
79.50	640.32	578.08	709.25
79.60	641.18	578.85	710.21
79.70	642.03	579.63	711.16
79.80	642.89	580.40	712.12
79.90	643.75	581.17	713.08
80.00	644.61	581.94	714.03
80.10	645.47	582.71	714.99
80.20	646.33	583.48	715.94
80.30	647.19	584.25	716.90
80.40	648.05	585.02	717.86
80.50	648.91	585.80	718.81
80.60	649.76	586.57	719.77
80.70	650.62	587.34	720.73
80.80	651.48	588.11	721.68
80.90	652.34	588.88	722.64
81.00	653.20	589.65	723.60
81.10	654.06	590.43	724.56
81.20	654.92	591.20	725.51
81.30	655.78	591.97	726.47
81.40	656.64	592.74	727.43
81.50	657.50	593.51	728.39
81.60	658.36	594.29	729.34
81.70	659.22	595.06	730.30
81.80	660.08	595.83	731.26
81.90	660.94	596.60	732.22
82.00	661.80	597.38	733.18
82.10	662.66	598.15	734.13
82.20	663.52	598.92	735.09
82.30	664.38	599.69	736.05
82.40	665.24	600.47	737.01
82.50	666.10	601.24	737.97
