# Supplementary material
Source: MDPI journal article supplement (https://www.mdpi.com/2504-446X/8/3/115)
Supplement: s1 [file s1 › Table S17 Paleosuchus trigonatus Framework.csv]

Head Length (cm)	Fit (estimation) (cm)	Lower limit (95% confidence interval) (cm)	Upper limit (95% confidence interval) (cm)
2.70	15.10	13.73	16.61
2.80	15.70	14.29	17.27
2.90	16.31	14.84	17.92
3.00	16.91	15.40	18.57
3.10	17.52	15.97	19.23
3.20	18.13	16.53	19.89
3.30	18.74	17.09	20.54
3.40	19.35	17.66	21.20
3.50	19.96	18.23	21.87
3.60	20.58	18.80	22.53
3.70	21.19	19.37	23.19
3.80	21.81	19.94	23.86
3.90	22.43	20.51	24.52
4.00	23.04	21.08	25.19
4.10	23.66	21.66	25.86
4.20	24.29	22.23	26.53
4.30	24.91	22.81	27.20
4.40	25.53	23.39	27.87
4.50	26.16	23.97	28.54
4.60	26.78	24.55	29.22
4.70	27.41	25.13	29.89
4.80	28.04	25.71	30.57
4.90	28.66	26.30	31.24
5.00	29.29	26.88	31.92
5.10	29.92	27.47	32.60
5.20	30.55	28.05	33.28
5.30	31.19	28.64	33.96
5.40	31.82	29.23	34.64
5.50	32.45	29.82	35.32
5.60	33.09	30.41	36.01
5.70	33.72	31.00	36.69
5.80	34.36	31.59	37.38
5.90	35.00	32.18	38.06
6.00	35.64	32.77	38.75
6.10	36.28	33.37	39.44
6.20	36.92	33.96	40.13
6.30	37.56	34.56	40.81
6.40	38.20	35.15	41.50
6.50	38.84	35.75	42.20
6.60	39.48	36.35	42.89
6.70	40.13	36.94	43.58
6.80	40.77	37.54	44.27
6.90	41.41	38.14	44.97
7.00	42.06	38.74	45.66
7.10	42.71	39.34	46.36
7.20	43.35	39.94	47.05
7.30	44.00	40.55	47.75
7.40	44.65	41.15	48.45
7.50	45.30	41.75	49.15
7.60	45.95	42.35	49.85
7.70	46.60	42.96	50.55
7.80	47.25	43.56	51.25
7.90	47.90	44.17	51.95
8.00	48.55	44.78	52.65
8.10	49.21	45.38	53.35
8.20	49.86	45.99	54.06
8.30	50.51	46.60	54.76
8.40	51.17	47.20	55.47
8.50	51.82	47.81	56.17
8.60	52.48	48.42	56.88
8.70	53.14	49.03	57.58
8.80	53.79	49.64	58.29
8.90	54.45	50.25	59.00
9.00	55.11	50.86	59.71
9.10	55.77	51.47	60.42
9.20	56.43	52.09	61.13
9.30	57.09	52.70	61.84
9.40	57.75	53.31	62.55
9.50	58.41	53.93	63.26
9.60	59.07	54.54	63.97
9.70	59.73	55.15	64.68
9.80	60.39	55.77	65.40
9.90	61.05	56.38	66.11
10.00	61.72	57.00	66.83
10.10	62.38	57.62	67.54
10.20	63.05	58.23	68.26
10.30	63.71	58.85	68.97
10.40	64.38	59.47	69.69
10.50	65.04	60.08	70.41
10.60	65.71	60.70	71.13
10.70	66.37	61.32	71.84
10.80	67.04	61.94	72.56
10.90	67.71	62.56	73.28
11.00	68.38	63.18	74.00
11.10	69.05	63.80	74.72
11.20	69.71	64.42	75.44
11.30	70.38	65.04	76.17
11.40	71.05	65.66	76.89
11.50	71.72	66.28	77.61
11.60	72.40	66.91	78.33
11.70	73.07	67.53	79.06
11.80	73.74	68.15	79.78
11.90	74.41	68.77	80.51
12.00	75.08	69.40	81.23
12.10	75.76	70.02	81.96
12.20	76.43	70.65	82.69
12.30	77.10	71.27	83.41
12.40	77.78	71.89	84.14
12.50	78.45	72.52	84.87
12.60	79.13	73.15	85.60
12.70	79.80	73.77	86.32
12.80	80.48	74.40	87.05
12.90	81.15	75.02	87.78
13.00	81.83	75.65	88.51
13.10	82.51	76.28	89.25
13.20	83.18	76.90	89.98
13.30	83.86	77.53	90.71
13.40	84.54	78.16	91.44
13.50	85.22	78.79	92.17
13.60	85.90	79.42	92.91
13.70	86.58	80.05	93.64
13.80	87.26	80.68	94.37
13.90	87.94	81.31	95.11
14.00	88.62	81.94	95.84
14.10	89.30	82.57	96.58
14.20	89.98	83.20	97.31
14.30	90.66	83.83	98.05
14.40	91.34	84.46	98.79
14.50	92.02	85.09	99.52
14.60	92.71	85.72	100.26
14.70	93.39	86.35	101.00
14.80	94.07	86.98	101.74
14.90	94.76	87.62	102.48
15.00	95.44	88.25	103.22
15.10	96.12	88.88	103.96
15.20	96.81	89.52	104.70
15.30	97.49	90.15	105.44
15.40	98.18	90.78	106.18
15.50	98.86	91.42	106.92
15.60	99.55	92.05	107.66
15.70	100.24	92.69	108.40
15.80	100.92	93.32	109.14
15.90	101.61	93.96	109.89
16.00	102.30	94.59	110.63
16.10	102.98	95.23	111.37
16.20	103.67	95.86	112.12
16.30	104.36	96.50	112.86
16.40	105.05	97.13	113.61
16.50	105.74	97.77	114.35
16.60	106.43	98.41	115.10
16.70	107.12	99.04	115.85
16.80	107.81	99.68	116.59
16.90	108.50	100.32	117.34
17.00	109.19	100.96	118.09
17.10	109.88	101.60	118.83
17.20	110.57	102.23	119.58
17.30	111.26	102.87	120.33
17.40	111.95	103.51	121.08
17.50	112.64	104.15	121.83
17.60	113.34	104.79	122.58
17.70	114.03	105.43	123.33
17.80	114.72	106.07	124.08
17.90	115.41	106.71	124.83
18.00	116.11	107.35	125.58
18.10	116.80	107.99	126.33
18.20	117.49	108.63	127.08
18.30	118.19	109.27	127.84
18.40	118.88	109.91	128.59
18.50	119.58	110.55	129.34
18.60	120.27	111.19	130.10
18.70	120.97	111.83	130.85
18.80	121.66	112.47	131.60
18.90	122.36	113.12	132.36
19.00	123.06	113.76	133.11
19.10	123.75	114.40	133.87
19.20	124.45	115.04	134.62
19.30	125.15	115.69	135.38
19.40	125.84	116.33	136.14
19.50	126.54	116.97	136.89
19.60	127.24	117.62	137.65
19.70	127.94	118.26	138.41
19.80	128.64	118.90	139.16
19.90	129.33	119.55	139.92
20.00	130.03	120.19	140.68
20.10	130.73	120.84	141.44
20.20	131.43	121.48	142.20
20.30	132.13	122.13	142.96
20.40	132.83	122.77	143.72
20.50	133.53	123.42	144.48
20.60	134.23	124.06	145.24
20.70	134.93	124.71	146.00
20.80	135.63	125.35	146.76
20.90	136.33	126.00	147.52
21.00	137.04	126.64	148.28
21.10	137.74	127.29	149.04
21.20	138.44	127.94	149.80
21.30	139.14	128.58	150.57
21.40	139.84	129.23	151.33
21.50	140.55	129.88	152.09
21.60	141.25	130.52	152.86
21.70	141.95	131.17	153.62
21.80	142.66	131.82	154.38
21.90	143.36	132.47	155.15
22.00	144.06	133.12	155.91
22.10	144.77	133.76	156.68
22.20	145.47	134.41	157.44
22.30	146.18	135.06	158.21
22.40	146.88	135.71	158.98
22.50	147.59	136.36	159.74
22.60	148.29	137.01	160.51
22.70	149.00	137.66	161.27
22.80	149.70	138.30	162.04
22.90	150.41	138.95	162.81
23.00	151.12	139.60	163.58
23.10	151.82	140.25	164.35
23.20	152.53	140.90	165.11
23.30	153.24	141.55	165.88
23.40	153.94	142.20	166.65
23.50	154.65	142.85	167.42
23.60	155.36	143.50	168.19
23.70	156.07	144.16	168.96
23.80	156.77	144.81	169.73
23.90	157.48	145.46	170.50
24.00	158.19	146.11	171.27
24.10	158.90	146.76	172.04
24.20	159.61	147.41	172.81
24.30	160.32	148.06	173.59
24.40	161.03	148.72	174.36
24.50	161.74	149.37	175.13
24.60	162.45	150.02	175.90
24.70	163.16	150.67	176.68
24.80	163.87	151.32	177.45
24.90	164.58	151.98	178.22
25.00	165.29	152.63	179.00
25.10	166.00	153.28	179.77
25.20	166.71	153.94	180.54
25.30	167.42	154.59	181.32
25.40	168.13	155.24	182.09
25.50	168.85	155.90	182.87
25.60	169.56	156.55	183.64
25.70	170.27	157.20	184.42
25.80	170.98	157.86	185.20
25.90	171.69	158.51	185.97
26.00	172.41	159.17	186.75
26.10	173.12	159.82	187.53
26.20	173.83	160.48	188.30
26.30	174.55	161.13	189.08
26.40	175.26	161.79	189.86
26.50	175.97	162.44	190.64
26.60	176.69	163.10	191.41
26.70	177.40	163.75	192.19
26.80	178.12	164.41	192.97
26.90	178.83	165.06	193.75
27.00	179.55	165.72	194.53
27.10	180.26	166.37	195.31
27.20	180.98	167.03	196.09
27.30	181.69	167.69	196.87
27.40	182.41	168.34	197.65
27.50	183.12	169.00	198.43
27.60	183.84	169.66	199.21
27.70	184.56	170.31	199.99
27.80	185.27	170.97	200.77
27.90	185.99	171.63	201.55
28.00	186.71	172.28	202.34
28.10	187.42	172.94	203.12
28.20	188.14	173.60	203.90
28.30	188.86	174.26	204.68
28.40	189.57	174.91	205.47
28.50	190.29	175.57	206.25
28.60	191.01	176.23	207.03
28.70	191.73	176.89	207.82
28.80	192.45	177.55	208.60
28.90	193.17	178.20	209.38
29.00	193.88	178.86	210.17
29.10	194.60	179.52	210.95
29.20	195.32	180.18	211.74
29.30	196.04	180.84	212.52
29.40	196.76	181.50	213.31
29.50	197.48	182.16	214.09
29.60	198.20	182.82	214.88
29.70	198.92	183.47	215.67
29.80	199.64	184.13	216.45
29.90	200.36	184.79	217.24
30.00	201.08	185.45	218.03
30.10	201.80	186.11	218.81
30.20	202.52	186.77	219.60
30.30	203.24	187.43	220.39
30.40	203.97	188.09	221.18
30.50	204.69	188.75	221.96
30.60	205.41	189.41	222.75
30.70	206.13	190.08	223.54
30.80	206.85	190.74	224.33
30.90	207.57	191.40	225.12
31.00	208.30	192.06	225.91
31.10	209.02	192.72	226.70
31.20	209.74	193.38	227.49
31.30	210.46	194.04	228.28
31.40	211.19	194.70	229.07
31.50	211.91	195.36	229.86
31.60	212.63	196.03	230.65
31.70	213.36	196.69	231.44
31.80	214.08	197.35	232.23
31.90	214.81	198.01	233.02
32.00	215.53	198.67	233.81
32.10	216.25	199.34	234.61
32.20	216.98	200.00	235.40
32.30	217.70	200.66	236.19
32.40	218.43	201.32	236.98
32.50	219.15	201.99	237.78
32.60	219.88	202.65	238.57
32.70	220.60	203.31	239.36
32.80	221.33	203.98	240.16
32.90	222.05	204.64	240.95
33.00	222.78	205.30	241.74
33.10	223.50	205.97	242.54
33.20	224.23	206.63	243.33
33.30	224.96	207.29	244.13
33.40	225.68	207.96	244.92
33.50	226.41	208.62	245.72
33.60	227.14	209.28	246.51
33.70	227.86	209.95	247.31
33.80	228.59	210.61	248.10
33.90	229.32	211.28	248.90
34.00	230.05	211.94	249.70
34.10	230.77	212.61	250.49
34.20	231.50	213.27	251.29
34.30	232.23	213.94	252.09
34.40	232.96	214.60	252.88
34.50	233.68	215.26	253.68
34.60	234.41	215.93	254.48
34.70	235.14	216.60	255.27
34.80	235.87	217.26	256.07
34.90	236.60	217.93	256.87
35.00	237.33	218.59	257.67
35.10	238.06	219.26	258.47
35.20	238.79	219.92	259.27
35.30	239.52	220.59	260.07
35.40	240.24	221.25	260.86
35.50	240.97	221.92	261.66
35.60	241.70	222.59	262.46
35.70	242.43	223.25	263.26
35.80	243.16	223.92	264.06
35.90	243.89	224.59	264.86
36.00	244.63	225.25	265.66
36.10	245.36	225.92	266.47
36.20	246.09	226.59	267.27
36.30	246.82	227.25	268.07
36.40	247.55	227.92	268.87
36.50	248.28	228.59	269.67
36.60	249.01	229.25	270.47
36.70	249.74	229.92	271.27
36.80	250.47	230.59	272.08
36.90	251.21	231.26	272.88
37.00	251.94	231.92	273.68
37.10	252.67	232.59	274.48
37.20	253.40	233.26	275.29
37.30	254.14	233.93	276.09
37.40	254.87	234.59	276.89
37.50	255.60	235.26	277.70
37.60	256.33	235.93	278.50
37.70	257.07	236.60	279.30
37.80	257.80	237.27	280.11
37.90	258.53	237.94	280.91
38.00	259.27	238.60	281.72
38.10	260.00	239.27	282.52
38.20	260.73	239.94	283.33
38.30	261.47	240.61	284.13
38.40	262.20	241.28	284.94
38.50	262.94	241.95	285.74
38.60	263.67	242.62	286.55
38.70	264.40	243.29	287.36
38.80	265.14	243.96	288.16
38.90	265.87	244.63	288.97
39.00	266.61	245.29	289.78
39.10	267.34	245.96	290.58
39.20	268.08	246.63	291.39
39.30	268.81	247.30	292.20
39.40	269.55	247.97	293.00
39.50	270.29	248.64	293.81
39.60	271.02	249.31	294.62
39.70	271.76	249.98	295.43
39.80	272.49	250.65	296.24
39.90	273.23	251.32	297.04
40.00	273.97	251.99	297.85
40.10	274.70	252.67	298.66
40.20	275.44	253.34	299.47
40.30	276.18	254.01	300.28
40.40	276.91	254.68	301.09
40.50	277.65	255.35	301.90
40.60	278.39	256.02	302.71
40.70	279.12	256.69	303.52
40.80	279.86	257.36	304.33
40.90	280.60	258.03	305.14
41.00	281.34	258.70	305.95
41.10	282.07	259.38	306.76
41.20	282.81	260.05	307.57
41.30	283.55	260.72	308.38
41.40	284.29	261.39	309.19
41.50	285.03	262.06	310.00
41.60	285.76	262.73	310.81
41.70	286.50	263.41	311.63
41.80	287.24	264.08	312.44
41.90	287.98	264.75	313.25
42.00	288.72	265.42	314.06
42.10	289.46	266.09	314.88
42.20	290.20	266.77	315.69
42.30	290.94	267.44	316.50
42.40	291.68	268.11	317.31
42.50	292.42	268.78	318.13
42.60	293.16	269.46	318.94
42.70	293.90	270.13	319.75
42.80	294.64	270.80	320.57
42.90	295.38	271.48	321.38
43.00	296.12	272.15	322.20
43.10	296.86	272.82	323.01
43.20	297.60	273.50	323.83
43.30	298.34	274.17	324.64
43.40	299.08	274.84	325.45
43.50	299.82	275.52	326.27
43.60	300.56	276.19	327.09
43.70	301.30	276.86	327.90
43.80	302.04	277.54	328.72
43.90	302.79	278.21	329.53
44.00	303.53	278.88	330.35
44.10	304.27	279.56	331.16
44.20	305.01	280.23	331.98
44.30	305.75	280.91	332.80
44.40	306.50	281.58	333.61
44.50	307.24	282.26	334.43
44.60	307.98	282.93	335.25
44.70	308.72	283.60	336.06
44.80	309.46	284.28	336.88
44.90	310.21	284.95	337.70
45.00	310.95	285.63	338.52
45.10	311.69	286.30	339.34
45.20	312.44	286.98	340.15
45.30	313.18	287.65	340.97
45.40	313.92	288.33	341.79
45.50	314.67	289.00	342.61
45.60	315.41	289.68	343.43
45.70	316.15	290.35	344.25
45.80	316.90	291.03	345.07
45.90	317.64	291.70	345.88
46.00	318.39	292.38	346.70
46.10	319.13	293.06	347.52
46.20	319.87	293.73	348.34
46.30	320.62	294.41	349.16
46.40	321.36	295.08	349.98
46.50	322.11	295.76	350.80
46.60	322.85	296.44	351.62
46.70	323.60	297.11	352.44
46.80	324.34	297.79	353.27
46.90	325.09	298.46	354.09
47.00	325.83	299.14	354.91
47.10	326.58	299.82	355.73
47.20	327.32	300.49	356.55
47.30	328.07	301.17	357.37
47.40	328.82	301.85	358.19
47.50	329.56	302.52	359.02
47.60	330.31	303.20	359.84
47.70	331.05	303.88	360.66
47.80	331.80	304.55	361.48
47.90	332.55	305.23	362.31
48.00	333.29	305.91	363.13
48.10	334.04	306.58	363.95
48.20	334.79	307.26	364.77
48.30	335.53	307.94	365.60
48.40	336.28	308.62	366.42
48.50	337.03	309.29	367.25
48.60	337.77	309.97	368.07
48.70	338.52	310.65	368.89
48.80	339.27	311.33	369.72
48.90	340.02	312.00	370.54
49.00	340.76	312.68	371.37
49.10	341.51	313.36	372.19
49.20	342.26	314.04	373.02
49.30	343.01	314.72	373.84
49.40	343.76	315.39	374.67
49.50	344.50	316.07	375.49
49.60	345.25	316.75	376.32
49.70	346.00	317.43	377.14
49.80	346.75	318.11	377.97
49.90	347.50	318.79	378.79
50.00	348.25	319.47	379.62
50.10	348.99	320.14	380.45
50.20	349.74	320.82	381.27
50.30	350.49	321.50	382.10
50.40	351.24	322.18	382.93
50.50	351.99	322.86	383.75
50.60	352.74	323.54	384.58
50.70	353.49	324.22	385.41
50.80	354.24	324.90	386.23
50.90	354.99	325.58	387.06
51.00	355.74	326.26	387.89
51.10	356.49	326.93	388.72
51.20	357.24	327.61	389.54
51.30	357.99	328.29	390.37
51.40	358.74	328.97	391.20
51.50	359.49	329.65	392.03
51.60	360.24	330.33	392.86
51.70	360.99	331.01	393.69
51.80	361.74	331.69	394.52
51.90	362.49	332.37	395.34
52.00	363.24	333.05	396.17
52.10	364.00	333.73	397.00
52.20	364.75	334.41	397.83
52.30	365.50	335.09	398.66
52.40	366.25	335.77	399.49
52.50	367.00	336.45	400.32
52.60	367.75	337.13	401.15
52.70	368.50	337.81	401.98
52.80	369.26	338.49	402.81
52.90	370.01	339.18	403.64
53.00	370.76	339.86	404.47
53.10	371.51	340.54	405.31
53.20	372.26	341.22	406.14
53.30	373.02	341.90	406.97
53.40	373.77	342.58	407.80
53.50	374.52	343.26	408.63
53.60	375.27	343.94	409.46
53.70	376.03	344.62	410.29
53.80	376.78	345.30	411.13
53.90	377.53	345.99	411.96
54.00	378.29	346.67	412.79
54.10	379.04	347.35	413.62
54.20	379.79	348.03	414.46
54.30	380.55	348.71	415.29
54.40	381.30	349.39	416.12
54.50	382.05	350.07	416.95
54.60	382.81	350.76	417.79
54.70	383.56	351.44	418.62
54.80	384.31	352.12	419.45
54.90	385.07	352.80	420.29
55.00	385.82	353.48	421.12
55.10	386.58	354.17	421.95
55.20	387.33	354.85	422.79
55.30	388.09	355.53	423.62
55.40	388.84	356.21	424.46
55.50	389.60	356.89	425.29
55.60	390.35	357.58	426.13
55.70	391.10	358.26	426.96
55.80	391.86	358.94	427.80
55.90	392.61	359.63	428.63
56.00	393.37	360.31	429.47
56.10	394.13	360.99	430.30
56.20	394.88	361.67	431.14
56.30	395.64	362.36	431.97
56.40	396.39	363.04	432.81
56.50	397.15	363.72	433.64
56.60	397.90	364.41	434.48
56.70	398.66	365.09	435.32
56.80	399.42	365.77	436.15
56.90	400.17	366.45	436.99
57.00	400.93	367.14	437.83
57.10	401.68	367.82	438.66
57.20	402.44	368.50	439.50
57.30	403.20	369.19	440.34
57.40	403.95	369.87	441.17
57.50	404.71	370.56	442.01
57.60	405.47	371.24	442.85
57.70	406.22	371.92	443.69
57.80	406.98	372.61	444.52
57.90	407.74	373.29	445.36
58.00	408.49	373.97	446.20
58.10	409.25	374.66	447.04
58.20	410.01	375.34	447.88
58.30	410.77	376.03	448.72
58.40	411.52	376.71	449.55
58.50	412.28	377.40	450.39
58.60	413.04	378.08	451.23
58.70	413.80	378.76	452.07
58.80	414.56	379.45	452.91
58.90	415.31	380.13	453.75
59.00	416.07	380.82	454.59
59.10	416.83	381.50	455.43
59.20	417.59	382.19	456.27
59.30	418.35	382.87	457.11
59.40	419.10	383.56	457.95
59.50	419.86	384.24	458.79
59.60	420.62	384.93	459.63
59.70	421.38	385.61	460.47
59.80	422.14	386.30	461.31
59.90	422.90	386.98	462.15
60.00	423.66	387.67	462.99
60.10	424.42	388.35	463.83
60.20	425.18	389.04	464.67
60.30	425.94	389.72	465.51
60.40	426.70	390.41	466.36
60.50	427.45	391.09	467.20
60.60	428.21	391.78	468.04
60.70	428.97	392.46	468.88
60.80	429.73	393.15	469.72
60.90	430.49	393.84	470.56
61.00	431.25	394.52	471.41
61.10	432.01	395.21	472.25
61.20	432.77	395.89	473.09
61.30	433.53	396.58	473.93
61.40	434.30	397.27	474.78
61.50	435.06	397.95	475.62
61.60	435.82	398.64	476.46
61.70	436.58	399.32	477.31
61.80	437.34	400.01	478.15
61.90	438.10	400.70	478.99
62.00	438.86	401.38	479.84
62.10	439.62	402.07	480.68
62.20	440.38	402.76	481.52
62.30	441.14	403.44	482.37
62.40	441.90	404.13	483.21
62.50	442.67	404.82	484.06
62.60	443.43	405.50	484.90
62.70	444.19	406.19	485.74
62.80	444.95	406.88	486.59
62.90	445.71	407.56	487.43
63.00	446.47	408.25	488.28
63.10	447.24	408.94	489.12
63.20	448.00	409.62	489.97
63.30	448.76	410.31	490.81
63.40	449.52	411.00	491.66
63.50	450.29	411.68	492.50
63.60	451.05	412.37	493.35
63.70	451.81	413.06	494.20
63.80	452.57	413.75	495.04
63.90	453.34	414.43	495.89
64.00	454.10	415.12	496.73
64.10	454.86	415.81	497.58
64.20	455.62	416.50	498.43
64.30	456.39	417.18	499.27
64.40	457.15	417.87	500.12
64.50	457.91	418.56	500.97
64.60	458.68	419.25	501.81
64.70	459.44	419.94	502.66
64.80	460.20	420.62	503.51
64.90	460.97	421.31	504.36
65.00	461.73	422.00	505.20
65.10	462.49	422.69	506.05
65.20	463.26	423.38	506.90
65.30	464.02	424.06	507.75
65.40	464.79	424.75	508.59
65.50	465.55	425.44	509.44
65.60	466.31	426.13	510.29
65.70	467.08	426.82	511.14
65.80	467.84	427.51	511.99
65.90	468.61	428.19	512.84
66.00	469.37	428.88	513.68
66.10	470.14	429.57	514.53
66.20	470.90	430.26	515.38
66.30	471.67	430.95	516.23
66.40	472.43	431.64	517.08
66.50	473.20	432.33	517.93
66.60	473.96	433.02	518.78
66.70	474.73	433.71	519.63
66.80	475.49	434.39	520.48
66.90	476.26	435.08	521.33
67.00	477.02	435.77	522.18
67.10	477.79	436.46	523.03
67.20	478.55	437.15	523.88
67.30	479.32	437.84	524.73
67.40	480.09	438.53	525.58
67.50	480.85	439.22	526.43
67.60	481.62	439.91	527.28
67.70	482.38	440.60	528.13
67.80	483.15	441.29	528.98
67.90	483.92	441.98	529.83
68.00	484.68	442.67	530.68
68.10	485.45	443.36	531.54
68.20	486.21	444.05	532.39
68.30	486.98	444.74	533.24
68.40	487.75	445.43	534.09
68.50	488.51	446.12	534.94
68.60	489.28	446.81	535.79
68.70	490.05	447.50	536.65
68.80	490.81	448.19	537.50
68.90	491.58	448.88	538.35
69.00	492.35	449.57	539.20
69.10	493.12	450.26	540.06
69.20	493.88	450.95	540.91
69.30	494.65	451.64	541.76
69.40	495.42	452.33	542.61
69.50	496.19	453.02	543.47
69.60	496.95	453.71	544.32
69.70	497.72	454.40	545.17
69.80	498.49	455.09	546.03
69.90	499.26	455.78	546.88
70.00	500.02	456.47	547.73
70.10	500.79	457.16	548.59
70.20	501.56	457.85	549.44
70.30	502.33	458.54	550.29
70.40	503.10	459.23	551.15
70.50	503.87	459.93	552.00
70.60	504.63	460.62	552.86
70.70	505.40	461.31	553.71
70.80	506.17	462.00	554.57
70.90	506.94	462.69	555.42
71.00	507.71	463.38	556.28
71.10	508.48	464.07	557.13
71.20	509.25	464.76	557.99
71.30	510.02	465.45	558.84
71.40	510.78	466.15	559.70
71.50	511.55	466.84	560.55
71.60	512.32	467.53	561.41
71.70	513.09	468.22	562.26
71.80	513.86	468.91	563.12
71.90	514.63	469.60	563.97
72.00	515.40	470.30	564.83
72.10	516.17	470.99	565.69
72.20	516.94	471.68	566.54
72.30	517.71	472.37	567.40
72.40	518.48	473.06	568.26
72.50	519.25	473.76	569.11
72.60	520.02	474.45	569.97
72.70	520.79	475.14	570.83
72.80	521.56	475.83	571.68
72.90	522.33	476.52	572.54
73.00	523.10	477.22	573.40
73.10	523.87	477.91	574.25
73.20	524.64	478.60	575.11
73.30	525.41	479.29	575.97
73.40	526.18	479.99	576.83
73.50	526.95	480.68	577.68
73.60	527.72	481.37	578.54
73.70	528.50	482.06	579.40
73.80	529.27	482.76	580.26
73.90	530.04	483.45	581.12
74.00	530.81	484.14	581.97
74.10	531.58	484.83	582.83
74.20	532.35	485.53	583.69
74.30	533.12	486.22	584.55
74.40	533.89	486.91	585.41
74.50	534.67	487.61	586.27
74.60	535.44	488.30	587.13
74.70	536.21	488.99	587.99
74.80	536.98	489.68	588.85
74.90	537.75	490.38	589.70
75.00	538.52	491.07	590.56
75.10	539.30	491.76	591.42
75.20	540.07	492.46	592.28
75.30	540.84	493.15	593.14
75.40	541.61	493.84	594.00
75.50	542.39	494.54	594.86
75.60	543.16	495.23	595.72
75.70	543.93	495.92	596.58
75.80	544.70	496.62	597.44
75.90	545.48	497.31	598.30
76.00	546.25	498.00	599.16
76.10	547.02	498.70	600.02
76.20	547.79	499.39	600.89
76.30	548.57	500.09	601.75
76.40	549.34	500.78	602.61
76.50	550.11	501.47	603.47
76.60	550.89	502.17	604.33
76.70	551.66	502.86	605.19
76.80	552.43	503.56	606.05
76.90	553.21	504.25	606.91
77.00	553.98	504.94	607.78
77.10	554.75	505.64	608.64
77.20	555.53	506.33	609.50
77.30	556.30	507.03	610.36
77.40	557.07	507.72	611.22
77.50	557.85	508.42	612.09
77.60	558.62	509.11	612.95
77.70	559.40	509.80	613.81
77.80	560.17	510.50	614.67
77.90	560.94	511.19	615.54
78.00	561.72	511.89	616.40
78.10	562.49	512.58	617.26
78.20	563.27	513.28	618.12
78.30	564.04	513.97	618.99
78.40	564.82	514.67	619.85
78.50	565.59	515.36	620.71
78.60	566.36	516.06	621.58
78.70	567.14	516.75	622.44
78.80	567.91	517.45	623.30
78.90	568.69	518.14	624.17
79.00	569.46	518.84	625.03
79.10	570.24	519.53	625.90
79.20	571.01	520.23	626.76
79.30	571.79	520.92	627.62
79.40	572.56	521.62	628.49
79.50	573.34	522.31	629.35
79.60	574.12	523.01	630.22
79.70	574.89	523.70	631.08
79.80	575.67	524.40	631.95
79.90	576.44	525.09	632.81
80.00	577.22	525.79	633.68
80.10	577.99	526.48	634.54
80.20	578.77	527.18	635.41
80.30	579.55	527.88	636.27
80.40	580.32	528.57	637.14
80.50	581.10	529.27	638.00
80.60	581.87	529.96	638.87
80.70	582.65	530.66	639.73
80.80	583.43	531.35	640.60
80.90	584.20	532.05	641.47
81.00	584.98	532.75	642.33
81.10	585.75	533.44	643.20
81.20	586.53	534.14	644.06
81.30	587.31	534.83	644.93
81.40	588.08	535.53	645.80
81.50	588.86	536.23	646.66
81.60	589.64	536.92	647.53
81.70	590.42	537.62	648.40
81.80	591.19	538.32	649.26
81.90	591.97	539.01	650.13
82.00	592.75	539.71	651.00
82.10	593.52	540.40	651.86
82.20	594.30	541.10	652.73
82.30	595.08	541.80	653.60
82.40	595.86	542.49	654.47
82.50	596.63	543.19	655.33
